# Supplementary material for: Comparative genomic analysis of Klebsiella pneumoniae subsp. pneumoniae KP617 and PittNDM01, NUHL24835, and ATCC BAA-2146 reveals unique evolutionary history of this strain
Source: Gut Pathog. 2016 Jul 11;8:34. doi: 10.1186/s13099-016-0117-1 (PMC4940875; doi:10.1186/s13099-016-0117-1)
Supplement: Supplementary file 1 — 10.1186/s13099-016-0117-1 Annotated genes of KP617 and comparison of their sequences with those of the reference strains by using the RAST server. [file 13099_2016_117_MOESM1_ESM.xlsx]

## Sheet: Seq-based Comparison
Table S1. Annotated genes of KP617 and comparison of their sequences with those of the reference strains by using the RAST server
Contig	Gene	Length	Gene id(KP617)	function	Hit	Contig	Gene	Gene id(PittNDM01)	percent identity 573.2207	function	Hit	Contig	Gene	Gene id(NUHL24835)	percent identity 573.2212	function	Hit	Contig	Gene	Gene id(PMK1)	percent identity 573.2215	function	Hit	Contig	Gene	Gene id(ATCC BAA-2146)	percent identity 573.2241	function
1	1	466	fig|573.1888.peg.1	Colanic acid biosynthsis UDP-glucose lipid carrier transferase WcaJ	bi	1	19	fig|573.2207.peg.19	100	Colanic acid biosynthsis UDP-glucose lipid carrier transferase WcaJ	bi	1	1	fig|573.2212.peg.1	100	Colanic acid biosynthsis UDP-glucose lipid carrier transferase WcaJ	bi	1	2	fig|573.2215.peg.2	31.85	Undecaprenyl-phosphate galactosephosphotransferase (EC 2.7.8.6)	bi	1	3416	fig|573.2241.peg.3416	44.95	Undecaprenyl-phosphate galactosephosphotransferase (EC 2.7.8.6)
1	2	469	fig|573.1888.peg.2	6-phosphogluconate dehydrogenase, decarboxylating (EC 1.1.1.44)	bi	1	20	fig|573.2207.peg.20	100	6-phosphogluconate dehydrogenase, decarboxylating (EC 1.1.1.44)	bi	1	2	fig|573.2212.peg.2	100	6-phosphogluconate dehydrogenase, decarboxylating (EC 1.1.1.44)	bi	1	4962	fig|573.2215.peg.4962	99.36	6-phosphogluconate dehydrogenase, decarboxylating (EC 1.1.1.44)	bi	1	3407	fig|573.2241.peg.3407	97.65	6-phosphogluconate dehydrogenase, decarboxylating (EC 1.1.1.44)
1	3	472	fig|573.1888.peg.3	Mannose-1-phosphate guanylyltransferase (GDP) (EC 2.7.7.22) / Mannose-6-phosphate isomerase (EC 5.3.1.8)	bi	1	21	fig|573.2207.peg.21	100	Mannose-1-phosphate guanylyltransferase (GDP) (EC 2.7.7.22) / Mannose-6-phosphate isomerase (EC 5.3.1.8)	bi	1	3	fig|573.2212.peg.3	99.79	Mannose-1-phosphate guanylyltransferase (GDP) (EC 2.7.7.22) / Mannose-6-phosphate isomerase (EC 5.3.1.8)	bi	1	4961	fig|573.2215.peg.4961	99.36	Mannose-1-phosphate guanylyltransferase (GDP) (EC 2.7.7.22)	bi	1	3406	fig|573.2241.peg.3406	90.66	Mannose-1-phosphate guanylyltransferase (GDP) (EC 2.7.7.22)
1	4	457	fig|573.1888.peg.4	Phosphomannomutase (EC 5.4.2.8)	bi	1	22	fig|573.2207.peg.22	100	Phosphomannomutase (EC 5.4.2.8)	bi	1	4	fig|573.2212.peg.4	100	Phosphomannomutase (EC 5.4.2.8)	bi	1	4960	fig|573.2215.peg.4960	99.56	Phosphomannomutase (EC 5.4.2.8)	bi	1	3436	fig|573.2241.peg.3436	91.89	Phosphomannomutase (EC 5.4.2.8)
1	5	389	fig|573.1888.peg.5	UDP-glucose 6-dehydrogenase (EC 1.1.1.22)	bi	1	23	fig|573.2207.peg.23	100	UDP-glucose 6-dehydrogenase (EC 1.1.1.22)	bi	1	5	fig|573.2212.peg.5	100	UDP-glucose 6-dehydrogenase (EC 1.1.1.22)	bi	1	4959	fig|573.2215.peg.4959	99.48	UDP-glucose 6-dehydrogenase (EC 1.1.1.22)	bi	1	3437	fig|573.2241.peg.3437	96.13	UDP-glucose dehydrogenase (EC 1.1.1.22)
1	6	359	fig|573.1888.peg.6	dTDP-glucose 4,6-dehydratase (EC 4.2.1.46)	bi	1	24	fig|573.2207.peg.24	100	dTDP-glucose 4,6-dehydratase (EC 4.2.1.46)	bi	1	6	fig|573.2212.peg.6	100	dTDP-glucose 4,6-dehydratase (EC 4.2.1.46)	bi	1	4957	fig|573.2215.peg.4957	99.7	dTDP-glucose 4,6-dehydratase (EC 4.2.1.46)	bi	1	3438	fig|573.2241.peg.3438	84.73	dTDP-glucose 4,6-dehydratase (EC 4.2.1.46)
1	7	256	fig|573.1888.peg.7	O-antigen export system permease protein RfbD	bi	1	25	fig|573.2207.peg.25	100	O-antigen export system permease protein RfbD	bi	1	7	fig|573.2212.peg.7	100	O-antigen export system permease protein RfbD	bi	1	4956	fig|573.2215.peg.4956	100	O-antigen export system permease protein RfbD	bi	1	3404	fig|573.2241.peg.3404	32.37	O-antigen export system permease protein RfbD
1	8	247	fig|573.1888.peg.8	Teichoic acid export ATP-binding protein TagH (EC 3.6.3.40)	bi	1	26	fig|573.2207.peg.26	100	Teichoic acid export ATP-binding protein TagH (EC 3.6.3.40)	bi	1	8	fig|573.2212.peg.8	100	Teichoic acid export ATP-binding protein TagH (EC 3.6.3.40)	bi	1	4955	fig|573.2215.peg.4955	99.59	Teichoic acid export ATP-binding protein TagH (EC 3.6.3.40)	bi	1	3403	fig|573.2241.peg.3403	45.5	Teichoic acid export ATP-binding protein TagH (EC 3.6.3.40)
1	9	636	fig|573.1888.peg.9	FIG00633989: hypothetical protein	bi	1	27	fig|573.2207.peg.27	100	FIG00633989: hypothetical protein	bi	1	9	fig|573.2212.peg.9	100	FIG00633989: hypothetical protein	bi	1	4954	fig|573.2215.peg.4954	99.37	FIG00633989: hypothetical protein	-				0
1	10	317	fig|573.1888.peg.10	UDP-galactopyranose mutase (EC 5.4.99.9)	bi	1	28	fig|573.2207.peg.28	100	UDP-galactopyranose mutase (EC 5.4.99.9)	bi	1	10	fig|573.2212.peg.10	100	UDP-galactopyranose mutase (EC 5.4.99.9)	bi	1	4953	fig|573.2215.peg.4953	99.37	UDP-galactopyranose mutase (EC 5.4.99.9)	-				0
1	11	298	fig|573.1888.peg.11	Putative glycosyl transferase	bi	1	29	fig|573.2207.peg.29	100	Putative glycosyl transferase	bi	1	11	fig|573.2212.peg.11	100	Putative glycosyl transferase	bi	1	4952	fig|573.2215.peg.4952	98.32	Putative glycosyl transferase	-				0
1	12	344	fig|573.1888.peg.12	Putative glycosyl transferase	bi	1	30	fig|573.2207.peg.30	100	Putative glycosyl transferase	bi	1	12	fig|573.2212.peg.12	100	Putative glycosyl transferase	bi	1	4951	fig|573.2215.peg.4951	99.1	Putative glycosyl transferase	-				0
1	13	201	fig|573.1888.peg.13	Mobile element protein	uni	1	1108	fig|573.2207.peg.1108	100	Mobile element protein	uni	1	1753	fig|573.2212.peg.1753	100	Mobile element protein	uni	1	763	fig|573.2215.peg.763	100	Mobile element protein	-				0
1	14	53	fig|573.1888.peg.14	Putative glycosyl transferase	bi	1	32	fig|573.2207.peg.32	100	Putative glycosyl transferase	uni	1	12	fig|573.2212.peg.12	97.62	Putative glycosyl transferase	uni	1	4951	fig|573.2215.peg.4951	97.62	Putative glycosyl transferase	-				0
1	15	424	fig|573.1888.peg.15	capsular polysaccharide biosynthsis protein	bi	1	33	fig|573.2207.peg.33	100	capsular polysaccharide biosynthsis protein	bi	1	13	fig|573.2212.peg.13	100	capsular polysaccharide biosynthsis protein	bi	1	4950	fig|573.2215.peg.4950	98.58	capsular polysaccharide biosynthsis protein	bi	1	3408	fig|573.2241.peg.3408	32.56	Glycosyltransferase (EC 2.4.1.-)
1	16	200	fig|573.1888.peg.16	Phosphoribosyl-AMP cyclohydrolase (EC 3.5.4.19) / Phosphoribosyl-ATP pyrophosphatase (EC 3.6.1.31)	bi	1	34	fig|573.2207.peg.34	100	Phosphoribosyl-AMP cyclohydrolase (EC 3.5.4.19) / Phosphoribosyl-ATP pyrophosphatase (EC 3.6.1.31)	bi	1	14	fig|573.2212.peg.14	100	Phosphoribosyl-AMP cyclohydrolase (EC 3.5.4.19) / Phosphoribosyl-ATP pyrophosphatase (EC 3.6.1.31)	bi	1	4949	fig|573.2215.peg.4949	98.99	Phosphoribosyl-AMP cyclohydrolase (EC 3.5.4.19) / Phosphoribosyl-ATP pyrophosphatase (EC 3.6.1.31)	bi	1	3392	fig|573.2241.peg.3392	98.99	Phosphoribosyl-AMP cyclohydrolase (EC 3.5.4.19) / Phosphoribosyl-ATP pyrophosphatase (EC 3.6.1.31)
1	17	259	fig|573.1888.peg.17	Imidazole glycerol phosphate synthase cyclase subunit (EC 4.1.3.-)	bi	1	35	fig|573.2207.peg.35	100	Imidazole glycerol phosphate synthase cyclase subunit (EC 4.1.3.-)	bi	1	15	fig|573.2212.peg.15	100	Imidazole glycerol phosphate synthase cyclase subunit (EC 4.1.3.-)	bi	1	4948	fig|573.2215.peg.4948	100	Imidazole glycerol phosphate synthase cyclase subunit (EC 4.1.3.-)	bi	1	3391	fig|573.2241.peg.3391	100	Imidazole glycerol phosphate synthase cyclase subunit (EC 4.1.3.-)
1	18	246	fig|573.1888.peg.18	Phosphoribosylformimino-5-aminoimidazole carboxamide ribotide isomerase (EC 5.3.1.16)	bi	1	36	fig|573.2207.peg.36	100	Phosphoribosylformimino-5-aminoimidazole carboxamide ribotide isomerase (EC 5.3.1.16)	bi	1	16	fig|573.2212.peg.16	100	Phosphoribosylformimino-5-aminoimidazole carboxamide ribotide isomerase (EC 5.3.1.16)	bi	1	4947	fig|573.2215.peg.4947	99.59	Phosphoribosylformimino-5-aminoimidazole carboxamide ribotide isomerase (EC 5.3.1.16)	bi	1	3390	fig|573.2241.peg.3390	99.59	Phosphoribosylformimino-5-aminoimidazole carboxamide ribotide isomerase (EC 5.3.1.16)
1	19	197	fig|573.1888.peg.19	Imidazole glycerol phosphate synthase amidotransferase subunit (EC 2.4.2.-)	bi	1	37	fig|573.2207.peg.37	100	Imidazole glycerol phosphate synthase amidotransferase subunit (EC 2.4.2.-)	bi	1	17	fig|573.2212.peg.17	100	Imidazole glycerol phosphate synthase amidotransferase subunit (EC 2.4.2.-)	bi	1	4946	fig|573.2215.peg.4946	100	Imidazole glycerol phosphate synthase amidotransferase subunit (EC 2.4.2.-)	bi	1	3389	fig|573.2241.peg.3389	98.98	Imidazole glycerol phosphate synthase amidotransferase subunit (EC 2.4.2.-)
1	20	356	fig|573.1888.peg.20	Histidinol-phosphatase (EC 3.1.3.15) / Imidazoleglycerol-phosphate dehydratase (EC 4.2.1.19)	bi	1	38	fig|573.2207.peg.38	100	Histidinol-phosphatase (EC 3.1.3.15) / Imidazoleglycerol-phosphate dehydratase (EC 4.2.1.19)	bi	1	18	fig|573.2212.peg.18	100	Histidinol-phosphatase (EC 3.1.3.15) / Imidazoleglycerol-phosphate dehydratase (EC 4.2.1.19)	bi	1	4945	fig|573.2215.peg.4945	100	Histidinol-phosphatase (EC 3.1.3.15) / Imidazoleglycerol-phosphate dehydratase (EC 4.2.1.19)	bi	1	3388	fig|573.2241.peg.3388	99.72	Histidinol-phosphatase (EC 3.1.3.15) / Imidazoleglycerol-phosphate dehydratase (EC 4.2.1.19)
1	21	354	fig|573.1888.peg.21	Histidinol-phosphate aminotransferase (EC 2.6.1.9)	bi	1	39	fig|573.2207.peg.39	100	Histidinol-phosphate aminotransferase (EC 2.6.1.9)	bi	1	19	fig|573.2212.peg.19	100	Histidinol-phosphate aminotransferase (EC 2.6.1.9)	bi	1	4944	fig|573.2215.peg.4944	99.72	Histidinol-phosphate aminotransferase (EC 2.6.1.9)	bi	1	3387	fig|573.2241.peg.3387	99.43	Histidinol-phosphate aminotransferase (EC 2.6.1.9)
1	22	435	fig|573.1888.peg.22	Histidinol dehydrogenase (EC 1.1.1.23)	bi	1	40	fig|573.2207.peg.40	100	Histidinol dehydrogenase (EC 1.1.1.23)	bi	1	20	fig|573.2212.peg.20	99.77	Histidinol dehydrogenase (EC 1.1.1.23)	bi	1	4943	fig|573.2215.peg.4943	99.54	Histidinol dehydrogenase (EC 1.1.1.23)	bi	1	3386	fig|573.2241.peg.3386	99.31	Histidinol dehydrogenase (EC 1.1.1.23)
1	23	300	fig|573.1888.peg.23	ATP phosphoribosyltransferase (EC 2.4.2.17)	bi	1	41	fig|573.2207.peg.41	100	ATP phosphoribosyltransferase (EC 2.4.2.17)	bi	1	21	fig|573.2212.peg.21	100	ATP phosphoribosyltransferase (EC 2.4.2.17)	bi	1	4942	fig|573.2215.peg.4942	100	ATP phosphoribosyltransferase (EC 2.4.2.17)	bi	1	3385	fig|573.2241.peg.3385	100	ATP phosphoribosyltransferase (EC 2.4.2.17)
1	24	275	fig|573.1888.peg.24	Nucleoside-diphosphate-sugar epimerases	bi	1	42	fig|573.2207.peg.42	100	Nucleoside-diphosphate-sugar epimerases	bi	1	22	fig|573.2212.peg.22	100	Nucleoside-diphosphate-sugar epimerases	bi	1	4941	fig|573.2215.peg.4941	100	Nucleoside-diphosphate-sugar epimerases	bi	1	3384	fig|573.2241.peg.3384	100	Nucleoside-diphosphate-sugar epimerases
1	25	297	fig|573.1888.peg.25	Hypothetical transcriptional regulator yeeY	bi	1	43	fig|573.2207.peg.43	100	Hypothetical transcriptional regulator yeeY	bi	1	23	fig|573.2212.peg.23	100	Hypothetical transcriptional regulator yeeY	bi	1	4940	fig|573.2215.peg.4940	99.32	Hypothetical transcriptional regulator yeeY	bi	1	3383	fig|573.2241.peg.3383	98.99	Hypothetical transcriptional regulator yeeY
1	26	429	fig|573.1888.peg.26	Putrescine importer	bi	1	44	fig|573.2207.peg.44	100	Putrescine importer	bi	1	24	fig|573.2212.peg.24	100	Putrescine importer	bi	1	4939	fig|573.2215.peg.4939	100	Putrescine importer	bi	1	3382	fig|573.2241.peg.3382	100	Putrescine importer
1	27	104	fig|573.1888.peg.27	Transcriptional regulator, ArsR family	bi	1	45	fig|573.2207.peg.45	100	Transcriptional regulator, ArsR family	bi	1	25	fig|573.2212.peg.25	100	Transcriptional regulator, ArsR family	bi	1	4938	fig|573.2215.peg.4938	100	Transcriptional regulator, ArsR family	bi	1	3381	fig|573.2241.peg.3381	100	Transcriptional regulator, ArsR family
1	28	701	fig|573.1888.peg.28	Translation elongation factor G	bi	1	46	fig|573.2207.peg.46	100	Translation elongation factor G	bi	1	26	fig|573.2212.peg.26	100	Translation elongation factor G	bi	1	4937	fig|573.2215.peg.4937	99.86	Translation elongation factor G	bi	1	3380	fig|573.2241.peg.3380	100	Translation elongation factor G
1	29	475	fig|573.1888.peg.29	Exodeoxyribonuclease I (EC 3.1.11.1)	bi	1	47	fig|573.2207.peg.47	100	Exodeoxyribonuclease I (EC 3.1.11.1)	bi	1	27	fig|573.2212.peg.27	100	Exodeoxyribonuclease I (EC 3.1.11.1)	bi	1	4936	fig|573.2215.peg.4936	98.31	Exodeoxyribonuclease I (EC 3.1.11.1)	bi	1	3379	fig|573.2241.peg.3379	99.16	Exodeoxyribonuclease I (EC 3.1.11.1)
1	30	350	fig|573.1888.peg.30	D-alanyl-D-alanine carboxypeptidase (EC 3.4.16.4)	bi	1	48	fig|573.2207.peg.48	100	D-alanyl-D-alanine carboxypeptidase (EC 3.4.16.4)	bi	1	28	fig|573.2212.peg.28	100	D-alanyl-D-alanine carboxypeptidase (EC 3.4.16.4)	bi	1	4935	fig|573.2215.peg.4935	99.43	D-alanyl-D-alanine carboxypeptidase (EC 3.4.16.4)	bi	1	3378	fig|573.2241.peg.3378	99.43	D-alanyl-D-alanine carboxypeptidase (EC 3.4.16.4)
1	31	495	fig|573.1888.peg.31	hypothetical protein	uni	1	1425	fig|573.2207.peg.1425	100	Retron-type RNA-directed DNA polymerase (EC 2.7.7.49)	uni	1	4122	fig|573.2212.peg.4122	22.94	Retron-type RNA-directed DNA polymerase (EC 2.7.7.49)	uni	1	3571	fig|573.2215.peg.3571	100	Retron-type RNA-directed DNA polymerase (EC 2.7.7.49)	uni	1	1655	fig|573.2241.peg.1655	100	hypothetical protein
1	32	158	fig|573.1888.peg.32	DNA gyrase inhibitory protein	bi	1	50	fig|573.2207.peg.50	100	DNA gyrase inhibitory protein	bi	1	29	fig|573.2212.peg.29	100	DNA gyrase inhibitory protein	bi	1	4934	fig|573.2215.peg.4934	99.36	DNA gyrase inhibitory protein	bi	1	3377	fig|573.2241.peg.3377	98.73	DNA gyrase inhibitory protein
1	33	353	fig|573.1888.peg.33	Putative inner membrane protein	bi	1	51	fig|573.2207.peg.51	100	Putative inner membrane protein	bi	1	30	fig|573.2212.peg.30	100	Putative inner membrane protein	bi	1	4933	fig|573.2215.peg.4933	100	Putative inner membrane protein	bi	1	3376	fig|573.2241.peg.3376	100	Putative inner membrane protein
1	34	108	fig|573.1888.peg.34	UPF0265 protein YeeX	bi	1	52	fig|573.2207.peg.52	100	UPF0265 protein YeeX	bi	1	31	fig|573.2212.peg.31	100	UPF0265 protein YeeX	bi	1	4932	fig|573.2215.peg.4932	100	UPF0265 protein YeeX	bi	1	3375	fig|573.2241.peg.3375	100	UPF0265 protein YeeX
1	35	247	fig|573.1888.peg.35	Cobalamin synthase (EC 2.7.8.26)	bi	1	53	fig|573.2207.peg.53	100	Cobalamin synthase (EC 2.7.8.26)	bi	1	32	fig|573.2212.peg.32	100	Cobalamin synthase (EC 2.7.8.26)	bi	1	4931	fig|573.2215.peg.4931	99.19	Cobalamin synthase (EC 2.7.8.26)	bi	1	3374	fig|573.2241.peg.3374	99.59	Cobalamin synthase (EC 2.7.8.26)
1	36	356	fig|573.1888.peg.36	Nicotinate-nucleotide--dimethylbenzimidazole phosphoribosyltransferase (EC 2.4.2.21)	bi	1	54	fig|573.2207.peg.54	100	Nicotinate-nucleotide--dimethylbenzimidazole phosphoribosyltransferase (EC 2.4.2.21)	bi	1	33	fig|573.2212.peg.33	99.72	Nicotinate-nucleotide--dimethylbenzimidazole phosphoribosyltransferase (EC 2.4.2.21)	bi	1	4930	fig|573.2215.peg.4930	98.31	Nicotinate-nucleotide--dimethylbenzimidazole phosphoribosyltransferase (EC 2.4.2.21)	bi	1	3373	fig|573.2241.peg.3373	98.87	Nicotinate-nucleotide--dimethylbenzimidazole phosphoribosyltransferase (EC 2.4.2.21)
1	37	378	fig|573.1888.peg.37	Adenosylhomocysteinase (EC 3.3.1.1)	bi	1	55	fig|573.2207.peg.55	99.73	Adenosylhomocysteinase (EC 3.3.1.1)	bi	1	34	fig|573.2212.peg.34	100	Adenosylhomocysteinase (EC 3.3.1.1)	bi	1	4929	fig|573.2215.peg.4929	99.19	Adenosylhomocysteinase (EC 3.3.1.1)	bi	1	3372	fig|573.2241.peg.3372	99.46	Adenosylhomocysteinase (EC 3.3.1.1)
1	38	244	fig|573.1888.peg.38	Probable transmembrane protein	bi	1	56	fig|573.2207.peg.56	100	Probable transmembrane protein	bi	1	35	fig|573.2212.peg.35	100	Probable transmembrane protein	bi	1	4928	fig|573.2215.peg.4928	100	Probable transmembrane protein	bi	1	3371	fig|573.2241.peg.3371	100	Probable transmembrane protein
1	39	130	fig|573.1888.peg.39	4-oxalocrotonate tautomerase	bi	1	57	fig|573.2207.peg.57	100	4-oxalocrotonate tautomerase	bi	1	36	fig|573.2212.peg.36	100	4-oxalocrotonate tautomerase	bi	1	4927	fig|573.2215.peg.4927	99.22	4-oxalocrotonate tautomerase	bi	1	3370	fig|573.2241.peg.3370	100	4-oxalocrotonate tautomerase
1	40	319	fig|573.1888.peg.40	Transcriptional regulator, LysR family	bi	1	58	fig|573.2207.peg.58	100	Transcriptional regulator, LysR family	bi	1	37	fig|573.2212.peg.37	100	Transcriptional regulator, LysR family	bi	1	4926	fig|573.2215.peg.4926	99.69	Transcriptional regulator, LysR family	bi	1	3369	fig|573.2241.peg.3369	99.06	Transcriptional regulator, LysR family
1	41	247	fig|573.1888.peg.41	Lipoate-protein ligase A	bi	1	59	fig|573.2207.peg.59	100	Lipoate-protein ligase A	bi	1	38	fig|573.2212.peg.38	100	Lipoate-protein ligase A	bi	1	4925	fig|573.2215.peg.4925	98.78	Lipoate-protein ligase A	bi	1	3368	fig|573.2241.peg.3368	99.19	Lipoate-protein ligase A
1	42	440	fig|573.1888.peg.42	Shikimate transporter	bi	1	60	fig|573.2207.peg.60	100	Shikimate transporter	bi	1	39	fig|573.2212.peg.39	100	Shikimate transporter	bi	1	4924	fig|573.2215.peg.4924	100	Shikimate transporter	bi	1	3367	fig|573.2241.peg.3367	99.54	Shikimate transporter
1	43	154	fig|573.1888.peg.43	FIG00732374: hypothetical protein	bi	1	61	fig|573.2207.peg.61	100	FIG00732374: hypothetical protein	bi	1	40	fig|573.2212.peg.40	100	FIG00732374: hypothetical protein	bi	1	4923	fig|573.2215.peg.4923	98.69	FIG00732374: hypothetical protein	bi	1	3366	fig|573.2241.peg.3366	99.35	FIG00732374: hypothetical protein
1	44	628	fig|573.1888.peg.44	FIG00731454: hypothetical protein	bi	1	62	fig|573.2207.peg.62	100	FIG00731454: hypothetical protein	bi	1	41	fig|573.2212.peg.41	99.84	FIG00731454: hypothetical protein	bi	1	4922	fig|573.2215.peg.4922	100	FIG00731454: hypothetical protein	bi	1	3365	fig|573.2241.peg.3365	100	FIG00731454: hypothetical protein
1	45	111	fig|573.1888.peg.45	FIG074102: hypothetical protein	bi	1	63	fig|573.2207.peg.63	100	FIG074102: hypothetical protein	bi	1	42	fig|573.2212.peg.42	100	FIG074102: hypothetical protein	bi	1	4921	fig|573.2215.peg.4921	99.09	FIG074102: hypothetical protein	bi	1	3363	fig|573.2241.peg.3363	99.09	FIG074102: hypothetical protein
1	46	112	fig|573.1888.peg.46	FIG00731334: hypothetical protein	bi	1	64	fig|573.2207.peg.64	100	FIG00731334: hypothetical protein	bi	1	43	fig|573.2212.peg.43	100	FIG00731334: hypothetical protein	bi	1	4920	fig|573.2215.peg.4920	99.1	FIG00731334: hypothetical protein	bi	1	3362	fig|573.2241.peg.3362	100	FIG00731334: hypothetical protein
1	47	305	fig|573.1888.peg.47	Glycine cleavage system transcriptional activator	bi	1	65	fig|573.2207.peg.65	100	Glycine cleavage system transcriptional activator	bi	1	44	fig|573.2212.peg.44	100	Glycine cleavage system transcriptional activator	bi	1	4919	fig|573.2215.peg.4919	99.01	Glycine cleavage system transcriptional activator	bi	1	3361	fig|573.2241.peg.3361	100	Glycine cleavage system transcriptional activator
1	48	192	fig|573.1888.peg.48	FIG00732030: hypothetical protein	bi	1	66	fig|573.2207.peg.66	100	FIG00732030: hypothetical protein	bi	1	45	fig|573.2212.peg.45	100	FIG00732030: hypothetical protein	bi	1	4918	fig|573.2215.peg.4918	100	FIG00732030: hypothetical protein	bi	1	3360	fig|573.2241.peg.3360	97.91	FIG00732030: hypothetical protein
1	49	279	fig|573.1888.peg.49	Non-heme chloroperoxidase (EC 1.11.1.10)	bi	1	67	fig|573.2207.peg.67	100	Non-heme chloroperoxidase (EC 1.11.1.10)	bi	1	46	fig|573.2212.peg.46	100	Non-heme chloroperoxidase (EC 1.11.1.10)	bi	1	4917	fig|573.2215.peg.4917	100	Non-heme chloroperoxidase (EC 1.11.1.10)	bi	1	3359	fig|573.2241.peg.3359	100	Non-heme chloroperoxidase (EC 1.11.1.10)
1	50	324	fig|573.1888.peg.50	FOG: GGDEF domain	bi	1	68	fig|573.2207.peg.68	100	FOG: GGDEF domain	bi	1	47	fig|573.2212.peg.47	100	FOG: GGDEF domain	bi	1	4916	fig|573.2215.peg.4916	100	FOG: GGDEF domain	bi	1	3358	fig|573.2241.peg.3358	100	FOG: GGDEF domain
1	51	368	fig|573.1888.peg.51	FIG00731820: hypothetical protein	bi	1	69	fig|573.2207.peg.69	100	FIG00731820: hypothetical protein	bi	1	48	fig|573.2212.peg.48	100	FIG00731820: hypothetical protein	bi	1	4915	fig|573.2215.peg.4915	100	FIG00731820: hypothetical protein	bi	1	3357	fig|573.2241.peg.3357	99.46	FIG00731820: hypothetical protein
1	52	321	fig|573.1888.peg.52	Patatin	bi	1	70	fig|573.2207.peg.70	100	Patatin	-				0		-				0		-				0
1	53	51	fig|573.1888.peg.53	hypothetical protein	bi	1	71	fig|573.2207.peg.71	100	hypothetical protein	-				0		-				0		-				0
1	54	582	fig|573.1888.peg.54	hypothetical protein	bi	1	72	fig|573.2207.peg.72	100	hypothetical protein	-				0		-				0		-				0
1	55	358	fig|573.1888.peg.55	patatin-related protein	bi	1	73	fig|573.2207.peg.73	100	patatin-related protein	-				0		-				0		-				0
1	56	433	fig|573.1888.peg.56	FIG01202724: hypothetical protein	bi	1	74	fig|573.2207.peg.74	100	FIG01202724: hypothetical protein	-				0		-				0		-				0
1	57	590	fig|573.1888.peg.57	Sulfur carrier protein adenylyltransferase ThiF	bi	1	75	fig|573.2207.peg.75	100	Sulfur carrier protein adenylyltransferase ThiF	uni	1	3149	fig|573.2212.peg.3149	33.06	Sulfur carrier protein adenylyltransferase ThiF	uni	1	1850	fig|573.2215.peg.1850	33.06	Sulfur carrier protein adenylyltransferase ThiF	uni	1	208	fig|573.2241.peg.208	33.06	Sulfur carrier protein adenylyltransferase ThiF
1	58	247	fig|573.1888.peg.58	antirestriction protein	bi	1	76	fig|573.2207.peg.76	100	antirestriction protein	bi	1	56	fig|573.2212.peg.56	89.84	antirestriction protein	bi	1	4908	fig|573.2215.peg.4908	90.65	antirestriction protein	bi	1	4413	fig|573.2241.peg.4413	44.65	Antirestriction protein
1	59	230	fig|573.1888.peg.59	VrlR-like protein	bi	1	77	fig|573.2207.peg.77	100	VrlR-like protein	-				0		-				0		-				0
1	60	1175	fig|573.1888.peg.60	FIG00464231: hypothetical protein	bi	1	78	fig|573.2207.peg.78	100	FIG00464231: hypothetical protein	-				0		bi	1	2604	fig|573.2215.peg.2604	40.41	FIG00464231: hypothetical protein	-				0
1	61	249	fig|573.1888.peg.61	TriL protein	bi	1	79	fig|573.2207.peg.79	100	TriL protein	bi	1	57	fig|573.2212.peg.57	84.15	TriL protein	bi	1	4907	fig|573.2215.peg.4907	85.77	TriL protein	-				0
1	62	620	fig|573.1888.peg.62	FIG00641840: hypothetical protein	bi	1	80	fig|573.2207.peg.80	100	FIG00641840: hypothetical protein	bi	1	58	fig|573.2212.peg.58	92.89	FIG00641840: hypothetical protein	bi	1	4906	fig|573.2215.peg.4906	90.95	FIG00641840: hypothetical protein	-				0
1	63	102	fig|573.1888.peg.63	IncN plasmid KikA protein	bi	1	81	fig|573.2207.peg.81	100	IncN plasmid KikA protein	bi	1	59	fig|573.2212.peg.59	100	IncN plasmid KikA protein	-				0		-				0
1	64	342	fig|573.1888.peg.64	ATPase required for both assembly of type IV secretion complex and secretion of T-DNA complex, VirB11	bi	1	82	fig|573.2207.peg.82	100	ATPase required for both assembly of type IV secretion complex and secretion of T-DNA complex, VirB11	bi	1	60	fig|573.2212.peg.60	100	ATPase required for both assembly of type IV secretion complex and secretion of T-DNA complex, VirB11	bi	1	4904	fig|573.2215.peg.4904	100	ATPase required for both assembly of type IV secretion complex and secretion of T-DNA complex, VirB11	uni	1	4395	fig|573.2241.peg.4395	32.35	Twitching motility protein PilT
1	65	417	fig|573.1888.peg.65	Inner membrane protein of type IV secretion of T-DNA complex, TonB-like, VirB10	bi	1	83	fig|573.2207.peg.83	100	Inner membrane protein of type IV secretion of T-DNA complex, TonB-like, VirB10	bi	1	61	fig|573.2212.peg.61	99.76	Inner membrane protein of type IV secretion of T-DNA complex, TonB-like, VirB10	bi	1	4903	fig|573.2215.peg.4903	99.76	Inner membrane protein of type IV secretion of T-DNA complex, TonB-like, VirB10	-				0
1	66	303	fig|573.1888.peg.66	Outer membrane and periplasm component of type IV secretion of T-DNA complex, has secretin-like domain, VirB9	bi	1	84	fig|573.2207.peg.84	100	Outer membrane and periplasm component of type IV secretion of T-DNA complex, has secretin-like domain, VirB9	bi	1	62	fig|573.2212.peg.62	100	Outer membrane and periplasm component of type IV secretion of T-DNA complex, has secretin-like domain, VirB9	bi	1	4902	fig|573.2215.peg.4902	100	Outer membrane and periplasm component of type IV secretion of T-DNA complex, has secretin-like domain, VirB9	-				0
1	67	228	fig|573.1888.peg.67	Inner membrane protein forms channel for type IV secretion of T-DNA complex, VirB8	bi	1	85	fig|573.2207.peg.85	100	Inner membrane protein forms channel for type IV secretion of T-DNA complex, VirB8	bi	1	63	fig|573.2212.peg.63	100	Inner membrane protein forms channel for type IV secretion of T-DNA complex, VirB8	bi	1	4901	fig|573.2215.peg.4901	100	Inner membrane protein forms channel for type IV secretion of T-DNA complex, VirB8	-				0
1	68	40	fig|573.1888.peg.68	hypothetical protein	bi	1	86	fig|573.2207.peg.86	100	hypothetical protein	bi	1	64	fig|573.2212.peg.64	100	hypothetical protein	bi	1	4900	fig|573.2215.peg.4900	100	hypothetical protein	-				0
1	69	358	fig|573.1888.peg.69	Inner membrane protein of type IV secretion of T-DNA complex, VirB6	bi	1	87	fig|573.2207.peg.87	100	Inner membrane protein of type IV secretion of T-DNA complex, VirB6	bi	1	65	fig|573.2212.peg.65	99.72	Inner membrane protein of type IV secretion of T-DNA complex, VirB6	bi	1	4899	fig|573.2215.peg.4899	100	Inner membrane protein of type IV secretion of T-DNA complex, VirB6	-				0
1	70	205	fig|573.1888.peg.70	Minor pilin of type IV secretion complex, VirB5	bi	1	88	fig|573.2207.peg.88	100	Minor pilin of type IV secretion complex, VirB5	bi	1	66	fig|573.2212.peg.66	99.51	Minor pilin of type IV secretion complex, VirB5	bi	1	4898	fig|573.2215.peg.4898	100	Minor pilin of type IV secretion complex, VirB5	-				0
1	71	913	fig|573.1888.peg.71	ATPase required for both assembly of type IV secretion complex and secretion of T-DNA complex, VirB4	bi	1	89	fig|573.2207.peg.89	100	ATPase required for both assembly of type IV secretion complex and secretion of T-DNA complex, VirB4	bi	1	67	fig|573.2212.peg.67	100	ATPase required for both assembly of type IV secretion complex and secretion of T-DNA complex, VirB4	bi	1	4897	fig|573.2215.peg.4897	99.89	ATPase required for both assembly of type IV secretion complex and secretion of T-DNA complex, VirB4	-				0
1	72	60	fig|573.1888.peg.72	hypothetical protein	bi	1	90	fig|573.2207.peg.90	100	hypothetical protein	bi	1	68	fig|573.2212.peg.68	100	hypothetical protein	bi	1	4896	fig|573.2215.peg.4896	100	hypothetical protein	-				0
1	73	78	fig|573.1888.peg.73	putative ATP/GTP-binding protein remnant	bi	1	91	fig|573.2207.peg.91	100	putative ATP/GTP-binding protein remnant	bi	1	69	fig|573.2212.peg.69	100	putative ATP/GTP-binding protein remnant	bi	1	4895	fig|573.2215.peg.4895	100	putative ATP/GTP-binding protein remnant	-				0
1	74	43	fig|573.1888.peg.74	hypothetical protein	bi	1	92	fig|573.2207.peg.92	100	hypothetical protein	bi	1	70	fig|573.2212.peg.70	100	hypothetical protein	bi	1	4894	fig|573.2215.peg.4894	100	hypothetical protein	uni	1	1149	fig|573.2241.peg.1149	52.63	Haemolysin expression modulating protein
1	75	194	fig|573.1888.peg.75	FIG01220315: hypothetical protein	bi	1	93	fig|573.2207.peg.93	100	FIG01220315: hypothetical protein	bi	1	71	fig|573.2212.peg.71	99.48	FIG01220315: hypothetical protein	bi	1	4893	fig|573.2215.peg.4893	99.48	FIG01220315: hypothetical protein	bi	1	4465	fig|573.2241.peg.4465	39.52	FIG004780: hypothetical protein in PFGI-1-like cluster
1	76	47	fig|573.1888.peg.76	FIG01220170: hypothetical protein	bi	1	94	fig|573.2207.peg.94	100	FIG01220170: hypothetical protein	-				0		-				0		-				0
1	77	309	fig|573.1888.peg.77	FIG00639976: hypothetical protein	bi	1	95	fig|573.2207.peg.95	100	FIG00639976: hypothetical protein	bi	1	72	fig|573.2212.peg.72	100	FIG00639976: hypothetical protein	bi	1	4892	fig|573.2215.peg.4892	100	FIG00639976: hypothetical protein	-				0
1	78	674	fig|573.1888.peg.78	Outer membrane receptor proteins, mostly Fe transport	bi	1	96	fig|573.2207.peg.96	100	Outer membrane receptor proteins, mostly Fe transport	bi	1	73	fig|573.2212.peg.73	99.7	TonB-dependent receptor	bi	1	4888	fig|573.2215.peg.4888	99.55	COG1629: Outer membrane receptor proteins, mostly Fe transport	uni	1	2104	fig|573.2241.peg.2104	30.91	Ferrichrome-iron receptor
1	79	526	fig|573.1888.peg.79	2,3-dihydroxybenzoate-AMP ligase (EC 2.7.7.58) of siderophore biosynthesis	bi	1	97	fig|573.2207.peg.97	100	2,3-dihydroxybenzoate-AMP ligase (EC 2.7.7.58) of siderophore biosynthesis	bi	1	74	fig|573.2212.peg.74	99.81	2,3-dihydroxybenzoate-AMP ligase (EC 2.7.7.58) of siderophore biosynthesis / Isochorismate synthase (EC 5.4.4.2) of siderophore biosynthesis	bi	1	4887	fig|573.2215.peg.4887	100	2,3-dihydroxybenzoate-AMP ligase (EC 2.7.7.58) of siderophore biosynthesis	uni	1	1399	fig|573.2241.peg.1399	42.45	2,3-dihydroxybenzoate-AMP ligase (EC 2.7.7.58) of siderophore biosynthesis
1	80	268	fig|573.1888.peg.80	Thioesterase	bi	1	98	fig|573.2207.peg.98	100	Thioesterase	bi	1	75	fig|573.2212.peg.75	100	Thioesterase	bi	1	4886	fig|573.2215.peg.4886	100	Thioesterase	-				0
1	81	367	fig|573.1888.peg.81	Thiazolinyl imide reductase in siderophore biosynthesis gene cluster	bi	1	99	fig|573.2207.peg.99	100	Thiazolinyl imide reductase in siderophore biosynthesis gene cluster	bi	1	76	fig|573.2212.peg.76	100	Thiazolinyl imide reductase in siderophore biosynthesis gene cluster	bi	1	4885	fig|573.2215.peg.4885	100	Thiazolinyl imide reductase in siderophore biosynthesis gene cluster	-				0
1	82	3164	fig|573.1888.peg.82	iron aquisition yersiniabactin synthesis enzyme (Irp1,polyketide synthetase) @ Siderophore biosynthesis non-ribosomal peptide synthetase modules	bi	1	100	fig|573.2207.peg.100	100	iron aquisition yersiniabactin synthesis enzyme (Irp1,polyketide synthetase) @ Siderophore biosynthesis non-ribosomal peptide synthetase modules	bi	1	77	fig|573.2212.peg.77	99.84	iron aquisition yersiniabactin synthesis enzyme (Irp1,polyketide synthetase) @ Siderophore biosynthesis non-ribosomal peptide synthetase modules	bi	1	4884	fig|573.2215.peg.4884	99.87	iron aquisition yersiniabactin synthesis enzyme (Irp1,polyketide synthetase) @ Siderophore biosynthesis non-ribosomal peptide synthetase modules	uni	1	2664	fig|573.2241.peg.2664	26.59	3-oxoacyl-[acyl-carrier-protein] synthase, KASII (EC 2.3.1.179)
1	83	2036	fig|573.1888.peg.83	iron aquisition yersiniabactin synthesis enzyme (Irp2)	bi	1	101	fig|573.2207.peg.101	100	iron aquisition yersiniabactin synthesis enzyme (Irp2)	bi	1	78	fig|573.2212.peg.78	99.85	iron aquisition yersiniabactin synthesis enzyme (Irp2)	bi	1	4883	fig|573.2215.peg.4883	99.85	iron aquisition yersiniabactin synthesis enzyme (Irp2)	uni	1	1392	fig|573.2241.peg.1392	32.02	Enterobactin synthetase component F, serine activating enzyme (EC 2.7.7.-)
1	84	320	fig|573.1888.peg.84	iron aquisition regulator (YbtA,AraC-like,required for transcription of FyuA/psn,Irp2)	bi	1	102	fig|573.2207.peg.102	100	iron aquisition regulator (YbtA,AraC-like,required for transcription of FyuA/psn,Irp2)	bi	1	79	fig|573.2212.peg.79	100	iron aquisition regulator (YbtA,AraC-like,required for transcription of FyuA/psn,Irp2)	bi	1	4882	fig|573.2215.peg.4882	100	iron aquisition regulator (YbtA,AraC-like,required for transcription of FyuA/psn,Irp2)	uni	1	2589	fig|573.2241.peg.2589	32.61	FIG00639224: hypothetical protein
1	85	571	fig|573.1888.peg.85	Putative ABC iron siderophore transporter, fused permease and ATPase domains	bi	1	103	fig|573.2207.peg.103	100	Putative ABC iron siderophore transporter, fused permease and ATPase domains	bi	1	80	fig|573.2212.peg.80	100	Putative ABC iron siderophore transporter, fused permease and ATPase domains	bi	1	4881	fig|573.2215.peg.4881	100	Putative ABC iron siderophore transporter, fused permease and ATPase domains	uni	1	1117	fig|573.2241.peg.1117	44.84	ATP-binding component of a transport system
1	86	601	fig|573.1888.peg.86	Inner membrane ABC-transporter YbtQ	bi	1	104	fig|573.2207.peg.104	100	Inner membrane ABC-transporter YbtQ	bi	1	81	fig|573.2212.peg.81	99.5	Inner membrane ABC-transporter YbtQ	bi	1	4880	fig|573.2215.peg.4880	99.83	Inner membrane ABC-transporter YbtQ	uni	1	1766	fig|573.2241.peg.1766	33.03	Lipid A export ATP-binding/permease protein MsbA
1	87	427	fig|573.1888.peg.87	Putative signal transducer	bi	1	105	fig|573.2207.peg.105	100	Putative signal transducer	bi	1	82	fig|573.2212.peg.82	100	Putative signal transducer	bi	1	4879	fig|573.2215.peg.4879	99.77	Putative signal transducer	uni	1	1099	fig|573.2241.peg.1099	25.97	AmpG permease
1	88	435	fig|573.1888.peg.88	Anthranilate synthase, aminase component (EC 4.1.3.27)	bi	1	106	fig|573.2207.peg.106	100	Anthranilate synthase, aminase component (EC 4.1.3.27)	bi	1	83	fig|573.2212.peg.83	100	Anthranilate synthase, aminase component (EC 4.1.3.27)	bi	1	4878	fig|573.2215.peg.4878	100	Anthranilate synthase, aminase component (EC 4.1.3.27)	uni	1	2117	fig|573.2241.peg.2117	31.27	Anthranilate synthase, aminase component (EC 4.1.3.27)
1	89	421	fig|573.1888.peg.89	Mobile element protein	bi	1	107	fig|573.2207.peg.107	100	Mobile element protein	bi	1	84	fig|573.2212.peg.84	99.05	Mobile element protein	bi	1	4845	fig|573.2215.peg.4845	98.06	Mobile element protein	uni	1	524	fig|573.2241.peg.524	55.1	COG0582: Integrase
1	90	51	fig|573.1888.peg.90	hypothetical protein	bi	1	108	fig|573.2207.peg.108	100	hypothetical protein	bi	1	85	fig|573.2212.peg.85	98	hypothetical protein	bi	1	4844	fig|573.2215.peg.4844	100	hypothetical protein	bi	1	3356	fig|573.2241.peg.3356	100	hypothetical protein
1	91	479	fig|573.1888.peg.91	FIG01069516: hypothetical protein	bi	1	109	fig|573.2207.peg.109	100	FIG01069516: hypothetical protein	bi	1	86	fig|573.2212.peg.86	100	FIG01069516: hypothetical protein	bi	1	4843	fig|573.2215.peg.4843	99.79	FIG01069516: hypothetical protein	bi	1	3355	fig|573.2241.peg.3355	100	FIG01069516: hypothetical protein
1	92	485	fig|573.1888.peg.92	AMP nucleosidase (EC 3.2.2.4)	bi	1	110	fig|573.2207.peg.110	100	AMP nucleosidase (EC 3.2.2.4)	bi	1	87	fig|573.2212.peg.87	100	AMP nucleosidase (EC 3.2.2.4)	bi	1	4842	fig|573.2215.peg.4842	100	AMP nucleosidase (EC 3.2.2.4)	bi	1	3354	fig|573.2241.peg.3354	100	AMP nucleosidase (EC 3.2.2.4)
1	93	82	fig|573.1888.peg.93	polymyxin resistance protein B	bi	1	111	fig|573.2207.peg.111	100	polymyxin resistance protein B	bi	1	88	fig|573.2212.peg.88	100	polymyxin resistance protein B	bi	1	4841	fig|573.2215.peg.4841	100	polymyxin resistance protein B	bi	1	3353	fig|573.2241.peg.3353	97.53	polymyxin resistance protein B
1	94	541	fig|573.1888.peg.94	Putative membrane protein	bi	1	112	fig|573.2207.peg.112	100	Putative membrane protein	bi	1	89	fig|573.2212.peg.89	100	Putative membrane protein	bi	1	4840	fig|573.2215.peg.4840	98.89	Putative membrane protein	bi	1	3352	fig|573.2241.peg.3352	98.52	Putative membrane protein
1	95	326	fig|573.1888.peg.95	YhdH, a putative quinone oxidoreductase	bi	1	113	fig|573.2207.peg.113	100	YhdH, a putative quinone oxidoreductase	bi	1	90	fig|573.2212.peg.90	100	YhdH, a putative quinone oxidoreductase	bi	1	4839	fig|573.2215.peg.4839	100	YhdH, a putative quinone oxidoreductase	bi	1	3351	fig|573.2241.peg.3351	99.38	YhdH, a putative quinone oxidoreductase
1	96	235	fig|573.1888.peg.96	Transcriptional regulator, TetR family	bi	1	114	fig|573.2207.peg.114	100	Transcriptional regulator, TetR family	bi	1	91	fig|573.2212.peg.91	100	Transcriptional regulator, TetR family	bi	1	4838	fig|573.2215.peg.4838	100	Transcriptional regulator, TetR family	bi	1	3350	fig|573.2241.peg.3350	98.72	Transcriptional regulator, TetR family
1	97	545	fig|573.1888.peg.97	Na+/H+ antiporter	bi	1	115	fig|573.2207.peg.115	100	Na+/H+ antiporter	bi	1	92	fig|573.2212.peg.92	100	Na+/H+ antiporter	bi	1	4837	fig|573.2215.peg.4837	100	Na+/H+ antiporter	bi	1	3349	fig|573.2241.peg.3349	100	Na+/H+ antiporter
1	98	306	fig|573.1888.peg.98	Nitrogen assimilation regulatory protein Nac	bi	1	116	fig|573.2207.peg.116	100	Nitrogen assimilation regulatory protein Nac	bi	1	93	fig|573.2212.peg.93	100	Nitrogen assimilation regulatory protein Nac	bi	1	4836	fig|573.2215.peg.4836	100	Nitrogen assimilation regulatory protein Nac	bi	1	3348	fig|573.2241.peg.3348	100	Nitrogen assimilation regulatory protein Nac
1	99	317	fig|573.1888.peg.99	Alkanesulfonate utilization operon LysR-family regulator CbI	bi	1	117	fig|573.2207.peg.117	100	Alkanesulfonate utilization operon LysR-family regulator CbI	bi	1	94	fig|573.2212.peg.94	100	Alkanesulfonate utilization operon LysR-family regulator CbI	bi	1	4835	fig|573.2215.peg.4835	100	Alkanesulfonate utilization operon LysR-family regulator CbI	bi	1	3347	fig|573.2241.peg.3347	99.68	Alkanesulfonate utilization operon LysR-family regulator CbI
1	100	314	fig|573.1888.peg.100	L,D-transpeptidase ErfK	bi	1	118	fig|573.2207.peg.118	100	L,D-transpeptidase ErfK	bi	1	95	fig|573.2212.peg.95	100	L,D-transpeptidase ErfK	bi	1	4834	fig|573.2215.peg.4834	100	L,D-transpeptidase ErfK	bi	1	3346	fig|573.2241.peg.3346	97.76	L,D-transpeptidase ErfK
1	101	79	fig|573.1888.peg.101	FIG00731602: hypothetical protein	bi	1	119	fig|573.2207.peg.119	98.72	FIG00731602: hypothetical protein	bi	1	96	fig|573.2212.peg.96	100	FIG00731602: hypothetical protein	bi	1	4833	fig|573.2215.peg.4833	100	FIG00731602: hypothetical protein	bi	1	3345	fig|573.2241.peg.3345	100	FIG00731602: hypothetical protein
1	102	260	fig|573.1888.peg.102	Transcriptional regulator, LysR family	bi	1	121	fig|573.2207.peg.121	100	Transcriptional regulator, LysR family	bi	1	98	fig|573.2212.peg.98	100	Transcriptional regulator, LysR family	bi	1	4832	fig|573.2215.peg.4832	99.02	Transcriptional regulator, LysR family	bi	1	3344	fig|573.2241.peg.3344	94.37	Transcriptional regulator, LysR family
1	103	267	fig|573.1888.peg.103	FIG01220476: hypothetical protein	bi	1	122	fig|573.2207.peg.122	100	FIG01220476: hypothetical protein	bi	1	99	fig|573.2212.peg.99	100	FIG01220476: hypothetical protein	bi	1	4830	fig|573.2215.peg.4830	100	FIG01220476: hypothetical protein	bi	1	3343	fig|573.2241.peg.3343	99.62	FIG01220476: hypothetical protein
1	104	382	fig|573.1888.peg.104	Outer membrane protein N precursor	bi	1	123	fig|573.2207.peg.123	100	Outer membrane protein N precursor	bi	1	142	fig|573.2212.peg.142	100	Outer membrane protein N precursor	bi	1	4829	fig|573.2215.peg.4829	100	Outer membrane protein N precursor	bi	1	3342	fig|573.2241.peg.3342	100	Outer membrane protein N precursor
1	105	94	fig|573.1888.peg.105	FIG00732248: hypothetical protein	bi	1	124	fig|573.2207.peg.124	100	FIG00732248: hypothetical protein	bi	1	143	fig|573.2212.peg.143	100	FIG00732248: hypothetical protein	bi	1	4828	fig|573.2215.peg.4828	100	FIG00732248: hypothetical protein	bi	1	3340	fig|573.2241.peg.3340	100	FIG00732248: hypothetical protein
1	106	236	fig|573.1888.peg.106	metal-dependent phosphohydrolase	bi	1	125	fig|573.2207.peg.125	100	metal-dependent phosphohydrolase	bi	1	144	fig|573.2212.peg.144	100	metal-dependent phosphohydrolase	bi	1	4827	fig|573.2215.peg.4827	100	metal-dependent phosphohydrolase	bi	1	3339	fig|573.2241.peg.3339	100	metal-dependent phosphohydrolase
1	107	467	fig|573.1888.peg.107	DNA-cytosine methyltransferase (EC 2.1.1.37)	bi	1	126	fig|573.2207.peg.126	100	DNA-cytosine methyltransferase (EC 2.1.1.37)	bi	1	145	fig|573.2212.peg.145	100	DNA-cytosine methyltransferase (EC 2.1.1.37)	bi	1	4826	fig|573.2215.peg.4826	100	DNA-cytosine methyltransferase (EC 2.1.1.37)	bi	1	3338	fig|573.2241.peg.3338	99.36	DNA-cytosine methyltransferase (EC 2.1.1.37)
1	108	166	fig|573.1888.peg.108	Very-short-patch mismatch repair endonuclease (G-T specific)	bi	1	127	fig|573.2207.peg.127	100	Very-short-patch mismatch repair endonuclease (G-T specific)	bi	1	146	fig|573.2212.peg.146	100	Very-short-patch mismatch repair endonuclease (G-T specific)	bi	1	4825	fig|573.2215.peg.4825	100	Very-short-patch mismatch repair endonuclease (G-T specific)	bi	1	3337	fig|573.2241.peg.3337	98.78	Very-short-patch mismatch repair endonuclease (G-T specific)
1	109	304	fig|573.1888.peg.109	Permease of the drug/metabolite transporter (DMT) superfamily	bi	1	128	fig|573.2207.peg.128	100	Permease of the drug/metabolite transporter (DMT) superfamily	bi	1	147	fig|573.2212.peg.147	100	Permease of the drug/metabolite transporter (DMT) superfamily	bi	1	4824	fig|573.2215.peg.4824	100	Permease of the drug/metabolite transporter (DMT) superfamily	bi	1	3336	fig|573.2241.peg.3336	99.67	Permease of the drug/metabolite transporter (DMT) superfamily
1	110	304	fig|573.1888.peg.110	Putative inner membrane protein	bi	1	129	fig|573.2207.peg.129	100	Putative inner membrane protein	bi	1	148	fig|573.2212.peg.148	100	Putative inner membrane protein	bi	1	4823	fig|573.2215.peg.4823	100	Putative inner membrane protein	bi	1	3335	fig|573.2241.peg.3335	100	Putative inner membrane protein
1	111	560	fig|573.1888.peg.111	FIG00732790: hypothetical protein	bi	1	130	fig|573.2207.peg.130	100	FIG00732790: hypothetical protein	bi	1	149	fig|573.2212.peg.149	100	FIG00732790: hypothetical protein	bi	1	4822	fig|573.2215.peg.4822	100	FIG00732790: hypothetical protein	bi	1	3334	fig|573.2241.peg.3334	99.46	FIG00732790: hypothetical protein
1	112	74	fig|573.1888.peg.112	putative cytoplasmic protein	bi	1	131	fig|573.2207.peg.131	100	putative cytoplasmic protein	bi	1	151	fig|573.2212.peg.151	100	putative cytoplasmic protein	bi	1	4821	fig|573.2215.peg.4821	100	putative cytoplasmic protein	bi	1	3333	fig|573.2241.peg.3333	100	putative cytoplasmic protein
1	113	64	fig|573.1888.peg.113	DsrB protein	bi	1	132	fig|573.2207.peg.132	100	DsrB protein	bi	1	152	fig|573.2212.peg.152	100	DsrB protein	bi	1	4820	fig|573.2215.peg.4820	100	DsrB protein	bi	1	3332	fig|573.2241.peg.3332	100	DsrB protein
1	114	208	fig|573.1888.peg.114	Colanic acid capsular biosynthesis activation accesory protein RcsA, co-regulator with RcsB	bi	1	133	fig|573.2207.peg.133	100	Colanic acid capsular biosynthesis activation accesory protein RcsA, co-regulator with RcsB	bi	1	153	fig|573.2212.peg.153	100	Colanic acid capsular biosynthesis activation accesory protein RcsA, co-regulator with RcsB	bi	1	4819	fig|573.2215.peg.4819	100	Colanic acid capsular biosynthesis activation accesory protein RcsA, co-regulator with RcsB	bi	1	3331	fig|573.2241.peg.3331	99.03	Colanic acid capsular biosynthesis activation accesory protein RcsA, co-regulator with RcsB
1	115	145	fig|573.1888.peg.115	FIG00640199: hypothetical protein	bi	1	134	fig|573.2207.peg.134	100	FIG00640199: hypothetical protein	bi	1	154	fig|573.2212.peg.154	100	FIG00640199: hypothetical protein	bi	1	4818	fig|573.2215.peg.4818	100	FIG00640199: hypothetical protein	bi	1	3330	fig|573.2241.peg.3330	100	FIG00640199: hypothetical protein
1	116	515	fig|573.1888.peg.116	Cytoplasmic alpha-amylase (EC 3.2.1.1)	bi	1	135	fig|573.2207.peg.135	100	Cytoplasmic alpha-amylase (EC 3.2.1.1)	bi	1	155	fig|573.2212.peg.155	100	Cytoplasmic alpha-amylase (EC 3.2.1.1)	bi	1	4817	fig|573.2215.peg.4817	100	Cytoplasmic alpha-amylase (EC 3.2.1.1)	bi	1	3329	fig|573.2241.peg.3329	99.8	Cytoplasmic alpha-amylase (EC 3.2.1.1)
1	117	267	fig|573.1888.peg.117	Cystine ABC transporter, periplasmic cystine-binding protein FliY	bi	1	136	fig|573.2207.peg.136	100	Cystine ABC transporter, periplasmic cystine-binding protein FliY	bi	1	156	fig|573.2212.peg.156	100	Cystine ABC transporter, periplasmic cystine-binding protein FliY	bi	1	4816	fig|573.2215.peg.4816	100	Cystine ABC transporter, periplasmic cystine-binding protein FliY	bi	1	3328	fig|573.2241.peg.3328	100	Cystine ABC transporter, periplasmic cystine-binding protein FliY
1	118	329	fig|573.1888.peg.118	D-cysteine desulfhydrase (EC 4.4.1.15)	bi	1	137	fig|573.2207.peg.137	100	D-cysteine desulfhydrase (EC 4.4.1.15)	bi	1	157	fig|573.2212.peg.157	100	D-cysteine desulfhydrase (EC 4.4.1.15)	bi	1	4815	fig|573.2215.peg.4815	100	D-cysteine desulfhydrase (EC 4.4.1.15)	bi	1	3327	fig|573.2241.peg.3327	99.09	D-cysteine desulfhydrase (EC 4.4.1.15)
1	119	223	fig|573.1888.peg.119	Cystine ABC transporter, permease protein	bi	1	138	fig|573.2207.peg.138	100	Cystine ABC transporter, permease protein	bi	1	158	fig|573.2212.peg.158	100	Cystine ABC transporter, permease protein	bi	1	4814	fig|573.2215.peg.4814	100	Cystine ABC transporter, permease protein	bi	1	3326	fig|573.2241.peg.3326	100	Cystine ABC transporter, permease protein
1	120	251	fig|573.1888.peg.120	Cystine ABC transporter, ATP-binding protein	bi	1	139	fig|573.2207.peg.139	100	Cystine ABC transporter, ATP-binding protein	bi	1	159	fig|573.2212.peg.159	100	Cystine ABC transporter, ATP-binding protein	bi	1	4813	fig|573.2215.peg.4813	99.57	Cystine ABC transporter, ATP-binding protein	bi	1	3325	fig|573.2241.peg.3325	100	Cystine ABC transporter, ATP-binding protein
1	121	241	fig|573.1888.peg.121	N-3-oxohexanoyl-L-homoserine lactone quorum-sensing transcriptional activator @ N-3-oxooctanoyl-L-homoserine lactone quorum-sensing transcriptional activator	bi	1	140	fig|573.2207.peg.140	100	N-3-oxohexanoyl-L-homoserine lactone quorum-sensing transcriptional activator @ N-3-oxooctanoyl-L-homoserine lactone quorum-sensing transcriptional activator	bi	1	160	fig|573.2212.peg.160	100	N-3-oxohexanoyl-L-homoserine lactone quorum-sensing transcriptional activator @ N-3-oxooctanoyl-L-homoserine lactone quorum-sensing transcriptional activator	bi	1	4812	fig|573.2215.peg.4812	100	N-3-oxohexanoyl-L-homoserine lactone quorum-sensing transcriptional activator @ N-3-oxooctanoyl-L-homoserine lactone quorum-sensing transcriptional activator	bi	1	3324	fig|573.2241.peg.3324	100	N-3-oxohexanoyl-L-homoserine lactone quorum-sensing transcriptional activator @ N-3-oxooctanoyl-L-homoserine lactone quorum-sensing transcriptional activator
1	122	75	fig|573.1888.peg.122	FIG00634007: hypothetical protein	bi	1	141	fig|573.2207.peg.141	100	FIG00634007: hypothetical protein	bi	1	161	fig|573.2212.peg.161	100	FIG00634007: hypothetical protein	bi	1	4811	fig|573.2215.peg.4811	100	FIG00634007: hypothetical protein	bi	1	3323	fig|573.2241.peg.3323	100	FIG00634007: hypothetical protein
1	123	236	fig|573.1888.peg.123	BarA-associated response regulator UvrY (= GacA = SirA)	bi	1	142	fig|573.2207.peg.142	100	BarA-associated response regulator UvrY (= GacA = SirA)	bi	1	162	fig|573.2212.peg.162	100	BarA-associated response regulator UvrY (= GacA = SirA)	bi	1	4810	fig|573.2215.peg.4810	100	BarA-associated response regulator UvrY (= GacA = SirA)	bi	1	3322	fig|573.2241.peg.3322	100	BarA-associated response regulator UvrY (= GacA = SirA)
1	124	611	fig|573.1888.peg.124	Excinuclease ABC subunit C	bi	1	143	fig|573.2207.peg.143	100	Excinuclease ABC subunit C	bi	1	163	fig|573.2212.peg.163	100	Excinuclease ABC subunit C	bi	1	4809	fig|573.2215.peg.4809	100	Excinuclease ABC subunit C	bi	1	3321	fig|573.2241.peg.3321	100	Excinuclease ABC subunit C
1	125	183	fig|573.1888.peg.125	CDP-diacylglycerol--glycerol-3-phosphate 3-phosphatidyltransferase (EC 2.7.8.5)	bi	1	144	fig|573.2207.peg.144	100	CDP-diacylglycerol--glycerol-3-phosphate 3-phosphatidyltransferase (EC 2.7.8.5)	bi	1	164	fig|573.2212.peg.164	100	CDP-diacylglycerol--glycerol-3-phosphate 3-phosphatidyltransferase (EC 2.7.8.5)	bi	1	4808	fig|573.2215.peg.4808	100	CDP-diacylglycerol--glycerol-3-phosphate 3-phosphatidyltransferase (EC 2.7.8.5)	bi	1	3320	fig|573.2241.peg.3320	99.45	CDP-diacylglycerol--glycerol-3-phosphate 3-phosphatidyltransferase (EC 2.7.8.5)
1	126	294	fig|573.1888.peg.126	4-hydroxy-tetrahydrodipicolinate synthase (EC 4.3.3.7)	bi	1	145	fig|573.2207.peg.145	100	4-hydroxy-tetrahydrodipicolinate synthase (EC 4.3.3.7)	bi	1	165	fig|573.2212.peg.165	100	4-hydroxy-tetrahydrodipicolinate synthase (EC 4.3.3.7)	bi	1	4807	fig|573.2215.peg.4807	100	4-hydroxy-tetrahydrodipicolinate synthase (EC 4.3.3.7)	bi	1	3319	fig|573.2241.peg.3319	99.66	4-hydroxy-tetrahydrodipicolinate synthase (EC 4.3.3.7)
1	127	218	fig|573.1888.peg.127	FIG00731320: hypothetical protein	bi	1	146	fig|573.2207.peg.146	100	FIG00731320: hypothetical protein	bi	1	166	fig|573.2212.peg.166	100	FIG00731320: hypothetical protein	bi	1	4806	fig|573.2215.peg.4806	100	FIG00731320: hypothetical protein	bi	1	3318	fig|573.2241.peg.3318	99.08	FIG00731320: hypothetical protein
1	128	404	fig|573.1888.peg.128	Tyrosine-specific transport protein	bi	1	147	fig|573.2207.peg.147	100	Tyrosine-specific transport protein	bi	1	167	fig|573.2212.peg.167	100	Tyrosine-specific transport protein	bi	1	4805	fig|573.2215.peg.4805	100	Tyrosine-specific transport protein	bi	1	3317	fig|573.2241.peg.3317	99.5	Tyrosine-specific transport protein
1	129	80	fig|573.1888.peg.129	FIG00731492: hypothetical protein	bi	1	148	fig|573.2207.peg.148	100	FIG00731492: hypothetical protein	bi	1	168	fig|573.2212.peg.168	100	FIG00731492: hypothetical protein	bi	1	4804	fig|573.2215.peg.4804	100	FIG00731492: hypothetical protein	bi	1	3316	fig|573.2241.peg.3316	98.73	FIG00731492: hypothetical protein
1	130	166	fig|573.1888.peg.130	Ferritin-like protein 2	bi	1	149	fig|573.2207.peg.149	100	Ferritin-like protein 2	bi	1	169	fig|573.2212.peg.169	100	Ferritin-like protein 2	bi	1	4803	fig|573.2215.peg.4803	100	Ferritin-like protein 2	bi	1	3315	fig|573.2241.peg.3315	100	Ferritin-like protein 2
1	131	60	fig|573.1888.peg.131	FIG00733022: hypothetical protein	bi	1	150	fig|573.2207.peg.150	100	FIG00733022: hypothetical protein	bi	1	170	fig|573.2212.peg.170	100	FIG00733022: hypothetical protein	bi	1	4802	fig|573.2215.peg.4802	100	FIG00733022: hypothetical protein	bi	1	3314	fig|573.2241.peg.3314	98.31	FIG00733022: hypothetical protein
1	132	213	fig|573.1888.peg.132	predicted 4-deoxy-L-threo-5-hexosulose-uronate ketol-isomerase (EC 5.3.1.17)	bi	1	151	fig|573.2207.peg.151	100	predicted 4-deoxy-L-threo-5-hexosulose-uronate ketol-isomerase (EC 5.3.1.17)	bi	1	171	fig|573.2212.peg.171	100	predicted 4-deoxy-L-threo-5-hexosulose-uronate ketol-isomerase (EC 5.3.1.17)	bi	1	4801	fig|573.2215.peg.4801	100	predicted 4-deoxy-L-threo-5-hexosulose-uronate ketol-isomerase (EC 5.3.1.17)	bi	1	3313	fig|573.2241.peg.3313	99.53	predicted 4-deoxy-L-threo-5-hexosulose-uronate ketol-isomerase (EC 5.3.1.17)
1	133	474	fig|573.1888.peg.133	Permeases of the major facilitator superfamily	bi	1	152	fig|573.2207.peg.152	100	Permeases of the major facilitator superfamily	bi	1	172	fig|573.2212.peg.172	100	Permeases of the major facilitator superfamily	bi	1	4800	fig|573.2215.peg.4800	100	Permeases of the major facilitator superfamily	bi	1	3312	fig|573.2241.peg.3312	100	Permeases of the major facilitator superfamily
1	134	84	fig|573.1888.peg.134	FIG00510289: hypothetical protein	bi	1	153	fig|573.2207.peg.153	100	FIG00510289: hypothetical protein	bi	1	173	fig|573.2212.peg.173	100	FIG00510289: hypothetical protein	bi	1	4799	fig|573.2215.peg.4799	100	FIG00510289: hypothetical protein	bi	1	3311	fig|573.2241.peg.3311	100	FIG00510289: hypothetical protein
1	135	504	fig|573.1888.peg.135	Putative transport protein	bi	1	154	fig|573.2207.peg.154	100	Putative transport protein	bi	1	174	fig|573.2212.peg.174	100	Putative transport protein	bi	1	4798	fig|573.2215.peg.4798	100	Putative transport protein	bi	1	3310	fig|573.2241.peg.3310	100	Putative transport protein
1	136	53	fig|573.1888.peg.136	hypothetical protein	bi	1	155	fig|573.2207.peg.155	100	hypothetical protein	bi	1	175	fig|573.2212.peg.175	100	hypothetical protein	bi	1	4797	fig|573.2215.peg.4797	100	hypothetical protein	bi	1	3309	fig|573.2241.peg.3309	98.08	hypothetical protein
1	137	170	fig|573.1888.peg.137	Ferritin-like protein 2	bi	1	156	fig|573.2207.peg.156	100	Ferritin-like protein 2	bi	1	176	fig|573.2212.peg.176	100	Ferritin-like protein 2	bi	1	4796	fig|573.2215.peg.4796	100	Ferritin-like protein 2	bi	1	3308	fig|573.2241.peg.3308	100	Ferritin-like protein 2
1	138	327	fig|573.1888.peg.138	L-arabinose-binding periplasmic protein precursor AraF (TC 3.A.1.2.2)	bi	1	157	fig|573.2207.peg.157	100	L-arabinose-binding periplasmic protein precursor AraF (TC 3.A.1.2.2)	bi	1	177	fig|573.2212.peg.177	100	L-arabinose-binding periplasmic protein precursor AraF (TC 3.A.1.2.2)	bi	1	4795	fig|573.2215.peg.4795	100	L-arabinose-binding periplasmic protein precursor AraF (TC 3.A.1.2.2)	bi	1	3306	fig|573.2241.peg.3306	100	L-arabinose-binding periplasmic protein precursor AraF (TC 3.A.1.2.2)
1	139	505	fig|573.1888.peg.139	L-arabinose transport ATP-binding protein AraG (TC 3.A.1.2.2)	bi	1	158	fig|573.2207.peg.158	100	L-arabinose transport ATP-binding protein AraG (TC 3.A.1.2.2)	bi	1	178	fig|573.2212.peg.178	100	L-arabinose transport ATP-binding protein AraG (TC 3.A.1.2.2)	bi	1	4794	fig|573.2215.peg.4794	100	L-arabinose transport ATP-binding protein AraG (TC 3.A.1.2.2)	bi	1	3305	fig|573.2241.peg.3305	100	L-arabinose transport ATP-binding protein AraG (TC 3.A.1.2.2)
1	140	327	fig|573.1888.peg.140	L-arabinose transport system permease protein (TC 3.A.1.2.2)	bi	1	159	fig|573.2207.peg.159	100	L-arabinose transport system permease protein (TC 3.A.1.2.2)	bi	1	179	fig|573.2212.peg.179	100	L-arabinose transport system permease protein (TC 3.A.1.2.2)	bi	1	4793	fig|573.2215.peg.4793	100	L-arabinose transport system permease protein (TC 3.A.1.2.2)	bi	1	3304	fig|573.2241.peg.3304	100	L-arabinose transport system permease protein (TC 3.A.1.2.2)
1	141	263	fig|573.1888.peg.141	Trehalose-6-phosphate phosphatase (EC 3.1.3.12)	bi	1	160	fig|573.2207.peg.160	100	Trehalose-6-phosphate phosphatase (EC 3.1.3.12)	bi	1	180	fig|573.2212.peg.180	99.62	Trehalose-6-phosphate phosphatase (EC 3.1.3.12)	bi	1	4792	fig|573.2215.peg.4792	99.62	Trehalose-6-phosphate phosphatase (EC 3.1.3.12)	bi	1	3303	fig|573.2241.peg.3303	99.62	Trehalose-6-phosphate phosphatase (EC 3.1.3.12)
1	142	475	fig|573.1888.peg.142	Alpha,alpha-trehalose-phosphate synthase [UDP-forming] (EC 2.4.1.15)	bi	1	161	fig|573.2207.peg.161	100	Alpha,alpha-trehalose-phosphate synthase [UDP-forming] (EC 2.4.1.15)	bi	1	181	fig|573.2212.peg.181	100	Alpha,alpha-trehalose-phosphate synthase [UDP-forming] (EC 2.4.1.15)	bi	1	4791	fig|573.2215.peg.4791	100	Alpha,alpha-trehalose-phosphate synthase [UDP-forming] (EC 2.4.1.15)	bi	1	3302	fig|573.2241.peg.3302	100	Alpha,alpha-trehalose-phosphate synthase [UDP-forming] (EC 2.4.1.15)
1	143	143	fig|573.1888.peg.143	Universal stress protein C	bi	1	162	fig|573.2207.peg.162	100	Universal stress protein C	bi	1	182	fig|573.2212.peg.182	100	Universal stress protein C	bi	1	4790	fig|573.2215.peg.4790	100	Universal stress protein C	bi	1	3301	fig|573.2241.peg.3301	100	Universal stress protein C
1	144	528	fig|573.1888.peg.144	Rhamnogalacturonide transporter RhiT	bi	1	163	fig|573.2207.peg.163	100	Rhamnogalacturonide transporter RhiT	bi	1	183	fig|573.2212.peg.183	100	Rhamnogalacturonide transporter RhiT	bi	1	4789	fig|573.2215.peg.4789	100	Rhamnogalacturonide transporter RhiT	bi	1	3300	fig|573.2241.peg.3300	100	Rhamnogalacturonide transporter RhiT
1	145	380	fig|573.1888.peg.145	Rhamnogalacturonides degradation protein RhiN	bi	1	164	fig|573.2207.peg.164	100	Rhamnogalacturonides degradation protein RhiN	bi	1	184	fig|573.2212.peg.184	100	Rhamnogalacturonides degradation protein RhiN	bi	1	4788	fig|573.2215.peg.4788	100	Rhamnogalacturonides degradation protein RhiN	bi	1	3299	fig|573.2241.peg.3299	99.74	Rhamnogalacturonides degradation protein RhiN
1	146	578	fig|573.1888.peg.146	Arginyl-tRNA synthetase (EC 6.1.1.19)	bi	1	165	fig|573.2207.peg.165	100	Arginyl-tRNA synthetase (EC 6.1.1.19)	bi	1	185	fig|573.2212.peg.185	100	Arginyl-tRNA synthetase (EC 6.1.1.19)	bi	1	4787	fig|573.2215.peg.4787	100	Arginyl-tRNA synthetase (EC 6.1.1.19)	bi	1	3298	fig|573.2241.peg.3298	99.83	Arginyl-tRNA synthetase (EC 6.1.1.19)
1	147	190	fig|573.1888.peg.147	Protein yecM	bi	1	166	fig|573.2207.peg.166	100	Protein yecM	bi	1	186	fig|573.2212.peg.186	100	Protein yecM	bi	1	4786	fig|573.2215.peg.4786	100	Protein yecM	bi	1	3297	fig|573.2241.peg.3297	99.47	Protein yecM
1	148	248	fig|573.1888.peg.148	Cytoplasmic copper homeostasis protein cutC	bi	1	167	fig|573.2207.peg.167	100	Cytoplasmic copper homeostasis protein cutC	bi	1	187	fig|573.2212.peg.187	100	Cytoplasmic copper homeostasis protein cutC	bi	1	4785	fig|573.2215.peg.4785	100	Cytoplasmic copper homeostasis protein cutC	bi	1	3296	fig|573.2241.peg.3296	99.6	Cytoplasmic copper homeostasis protein cutC
1	149	335	fig|573.1888.peg.149	tRNA (5-methoxyuridine) 34 synthase	bi	1	168	fig|573.2207.peg.168	100	tRNA (5-methoxyuridine) 34 synthase	bi	1	188	fig|573.2212.peg.188	100	tRNA (5-methoxyuridine) 34 synthase	bi	1	4784	fig|573.2215.peg.4784	100	tRNA (5-methoxyuridine) 34 synthase	bi	1	3295	fig|573.2241.peg.3295	99.7	tRNA (5-methoxyuridine) 34 synthase
1	150	248	fig|573.1888.peg.150	tRNA (uridine-5-oxyacetic acid methyl ester) 34 synthase	bi	1	169	fig|573.2207.peg.169	100	tRNA (uridine-5-oxyacetic acid methyl ester) 34 synthase	bi	1	189	fig|573.2212.peg.189	100	tRNA (uridine-5-oxyacetic acid methyl ester) 34 synthase	bi	1	4783	fig|573.2215.peg.4783	100	tRNA (uridine-5-oxyacetic acid methyl ester) 34 synthase	bi	1	3294	fig|573.2241.peg.3294	100	tRNA (uridine-5-oxyacetic acid methyl ester) 34 synthase
1	151	132	fig|573.1888.peg.151	FIG01046209: inner membrane protein	bi	1	170	fig|573.2207.peg.170	100	FIG01046209: inner membrane protein	bi	1	190	fig|573.2212.peg.190	100	FIG01046209: inner membrane protein	bi	1	4782	fig|573.2215.peg.4782	100	FIG01046209: inner membrane protein	bi	1	3293	fig|573.2241.peg.3293	100	FIG01046209: inner membrane protein
1	152	258	fig|573.1888.peg.152	FIG003003: hypothetical protein	bi	1	171	fig|573.2207.peg.171	100	FIG003003: hypothetical protein	bi	1	191	fig|573.2212.peg.191	97.27	FIG003003: hypothetical protein	bi	1	4781	fig|573.2215.peg.4781	97.27	FIG003003: hypothetical protein	bi	1	3292	fig|573.2241.peg.3292	96.88	FIG003003: hypothetical protein
1	153	420	fig|573.1888.peg.153	Phage integrase	bi	1	172	fig|573.2207.peg.172	100	Phage integrase	-				0		-				0		-				0
1	154	148	fig|573.1888.peg.154	Phage-related protein	bi	1	174	fig|573.2207.peg.174	100	Phage-related protein	-				0		-				0		-				0
1	155	91	fig|573.1888.peg.155	Phage protein	bi	1	175	fig|573.2207.peg.175	100	Phage protein	-				0		-				0		-				0
1	156	176	fig|573.1888.peg.156	putative DNA methylase	bi	1	176	fig|573.2207.peg.176	100	putative DNA methylase	-				0		-				0		-				0
1	157	207	fig|573.1888.peg.157	exonuclease( EC:3.1.11.3 )	bi	1	177	fig|573.2207.peg.177	100	exonuclease( EC:3.1.11.3 )	-				0		-				0		bi	1	1197	fig|573.2241.peg.1197	24.51	Phage exonuclease (EC 3.1.11.3); Putative phage-encoded enzyme involved in integration-recombination
1	158	41	fig|573.1888.peg.158	hypothetical protein	bi	1	178	fig|573.2207.peg.178	100	hypothetical protein	-				0		-				0		-				0
1	159	95	fig|573.1888.peg.159	hypothetical protein	bi	1	179	fig|573.2207.peg.179	100	hypothetical protein	-				0		-				0		bi	1	2156	fig|573.2241.peg.2156	95.74	hypothetical protein
1	160	324	fig|573.1888.peg.160	TolA protein	bi	1	180	fig|573.2207.peg.180	100	TolA protein	-				0		-				0		-				0
1	161	65	fig|573.1888.peg.161	hypothetical protein	bi	1	181	fig|573.2207.peg.181	100	hypothetical protein	-				0		-				0		bi	1	2157	fig|573.2241.peg.2157	63.46	hypothetical protein
1	162	53	fig|573.1888.peg.162	hypothetical protein	bi	1	182	fig|573.2207.peg.182	100	hypothetical protein	-				0		-				0		bi	1	2158	fig|573.2241.peg.2158	78.95	hypothetical protein
1	163	41	fig|573.1888.peg.163	hypothetical protein	bi	1	183	fig|573.2207.peg.183	100	hypothetical protein	-				0		-				0		-				0
1	164	139	fig|573.1888.peg.164	COG2932: Predicted transcriptional regulator	bi	1	184	fig|573.2207.peg.184	100	COG2932: Predicted transcriptional regulator	-				0		-				0		bi	1	2161	fig|573.2241.peg.2161	94.2	COG2932: Predicted transcriptional regulator
1	165	74	fig|573.1888.peg.165	hypothetical protein	bi	1	185	fig|573.2207.peg.185	100	hypothetical protein	-				0		-				0		bi	1	1202	fig|573.2241.peg.1202	100	hypothetical protein
1	166	259	fig|573.1888.peg.166	Origin specific replication binding factor	bi	1	186	fig|573.2207.peg.186	100	Origin specific replication binding factor	-				0		-				0		-				0
1	167	101	fig|573.1888.peg.167	hypothetical protein	bi	1	187	fig|573.2207.peg.187	100	hypothetical protein	-				0		-				0		-				0
1	168	130	fig|573.1888.peg.168	hypothetical protein	bi	1	188	fig|573.2207.peg.188	100	hypothetical protein	-				0		-				0		bi	1	3812	fig|573.2241.peg.3812	64.49	hypothetical protein
1	169	298	fig|573.1888.peg.169	Phage NinC	bi	1	189	fig|573.2207.peg.189	100	hypothetical protein	-				0		-				0		-				0
1	170	229	fig|573.1888.peg.170	Phage protein	bi	1	190	fig|573.2207.peg.190	100	Phage protein	-				0		-				0		-				0
1	171	86	fig|573.1888.peg.171	DNA polymerase III theta subunit (EC 2.7.7.7)	bi	1	191	fig|573.2207.peg.191	100	DNA polymerase III theta subunit (EC 2.7.7.7)	uni	1	215	fig|573.2212.peg.215	63.08	DNA polymerase III theta subunit (EC 2.7.7.7)	uni	1	4757	fig|573.2215.peg.4757	63.08	DNA polymerase III theta subunit (EC 2.7.7.7)	uni	1	3268	fig|573.2241.peg.3268	63.08	DNA polymerase III theta subunit (EC 2.7.7.7)
1	172	87	fig|573.1888.peg.172	Phage protein	bi	1	192	fig|573.2207.peg.192	100	Phage protein	-				0		-				0		-				0
1	173	213	fig|573.1888.peg.173	Protein NinG	bi	1	194	fig|573.2207.peg.194	100	Protein NinG	-				0		-				0		bi	1	1212	fig|573.2241.peg.1212	49.53	Phage NinG rap recombination
1	174	166	fig|573.1888.peg.174	Phage antitermination protein Q	bi	1	195	fig|573.2207.peg.195	100	Phage antitermination protein Q	-				0		-				0		bi	1	1213	fig|573.2241.peg.1213	96.36	antiterminator-like protein
1	175	164	fig|573.1888.peg.175	Phage lysin (EC 3.2.1.17) # Phage lysozyme or muramidase (EC 3.2.1.17)	bi	1	196	fig|573.2207.peg.196	100	Phage lysin (EC 3.2.1.17) # Phage lysozyme or muramidase (EC 3.2.1.17)	bi	1	1482	fig|573.2212.peg.1482	87.62	Phage lysin (EC 3.2.1.17) # Phage lysozyme or muramidase (EC 3.2.1.17)	-				0		bi	1	1679	fig|573.2241.peg.1679	37.21	Prophage lysozyme (EC 3.2.1.17); Phage lysin
1	176	108	fig|573.1888.peg.176	Phage outer membrane lytic protein Rz	bi	1	197	fig|573.2207.peg.197	100	Phage outer membrane lytic protein Rz	-				0		-				0		bi	1	2229	fig|573.2241.peg.2229	30	Phage outer membrane lytic protein Rz
1	177	39	fig|573.1888.peg.177	hypothetical protein	bi	1	198	fig|573.2207.peg.198	100	hypothetical protein	-				0		-				0		-				0
1	178	201	fig|573.1888.peg.178	FIG01045330: hypothetical protein	bi	1	199	fig|573.2207.peg.199	100	FIG01045330: hypothetical protein	-				0		-				0		bi	1	1219	fig|573.2241.peg.1219	97	FIG01045330: hypothetical protein
1	179	491	fig|573.1888.peg.179	FIG01220481: hypothetical protein	bi	1	200	fig|573.2207.peg.200	100	FIG01220481: hypothetical protein	-				0		-				0		bi	1	1220	fig|573.2241.peg.1220	98.98	FIG01220481: hypothetical protein
1	180	488	fig|573.1888.peg.180	gp5	bi	1	201	fig|573.2207.peg.201	100	gp5	-				0		-				0		bi	1	1221	fig|573.2241.peg.1221	95.14	gp5
1	181	41	fig|573.1888.peg.181	hypothetical protein	bi	1	202	fig|573.2207.peg.202	100	hypothetical protein	-				0		-				0		-				0
1	182	253	fig|573.1888.peg.182	COG0840: Methyl-accepting chemotaxis protein	bi	1	203	fig|573.2207.peg.203	100	COG0840: Methyl-accepting chemotaxis protein	-				0		-				0		bi	1	1222	fig|573.2241.peg.1222	89.02	COG0840: Methyl-accepting chemotaxis protein
1	183	452	fig|573.1888.peg.183	gp7	bi	1	204	fig|573.2207.peg.204	100	gp7	-				0		-				0		bi	1	1224	fig|573.2241.peg.1224	52.56	gp7
1	184	117	fig|573.1888.peg.184	Phage protein	bi	1	205	fig|573.2207.peg.205	100	Phage protein	-				0		-				0		-				0
1	185	352	fig|573.1888.peg.185	FIG01045895: hypothetical protein	bi	1	206	fig|573.2207.peg.206	100	FIG01045895: hypothetical protein	-				0		-				0		bi	1	1226	fig|573.2241.peg.1226	27.87	FIG01045895: hypothetical protein
1	186	80	fig|573.1888.peg.186	hypothetical protein	bi	1	207	fig|573.2207.peg.207	100	hypothetical protein	-				0		-				0		bi	1	1227	fig|573.2241.peg.1227	59.38	hypothetical protein
1	187	127	fig|573.1888.peg.187	FIG00731856: hypothetical protein	bi	1	208	fig|573.2207.peg.208	100	FIG00731856: hypothetical protein	-				0		-				0		bi	1	1228	fig|573.2241.peg.1228	99.21	FIG00731856: hypothetical protein
1	188	42	fig|573.1888.peg.188	hypothetical protein	bi	1	209	fig|573.2207.peg.209	100	hypothetical protein	-				0		-				0		-				0
1	189	60	fig|573.1888.peg.189	hypothetical protein	bi	1	210	fig|573.2207.peg.210	100	hypothetical protein	-				0		-				0		bi	1	1229	fig|573.2241.peg.1229	94.92	FIG00553556: hypothetical protein
1	190	123	fig|573.1888.peg.190	FIG00553480: hypothetical protein	bi	1	211	fig|573.2207.peg.211	100	FIG00553480: hypothetical protein	-				0		-				0		-				0
1	191	128	fig|573.1888.peg.191	Phage protein	bi	1	212	fig|573.2207.peg.212	100	Phage protein	-				0		-				0		bi	1	1230	fig|573.2241.peg.1230	39.47	hypothetical protein
1	192	255	fig|573.1888.peg.192	FIG00627013: hypothetical protein	bi	1	213	fig|573.2207.peg.213	100	FIG00627013: hypothetical protein	-				0		-				0		bi	1	1231	fig|573.2241.peg.1231	41.88	Putative phage protein
1	193	238	fig|573.1888.peg.193	Phage protein	bi	1	214	fig|573.2207.peg.214	100	Phage protein	-				0		-				0		bi	1	1232	fig|573.2241.peg.1232	78.02	Phage protein
1	194	110	fig|573.1888.peg.194	FIG01048207: hypothetical protein	bi	1	215	fig|573.2207.peg.215	100	FIG01048207: hypothetical protein	-				0		-				0		-				0
1	195	39	fig|573.1888.peg.195	hypothetical protein	bi	1	216	fig|573.2207.peg.216	100	hypothetical protein	-				0		-				0		-				0
1	196	88	fig|573.1888.peg.196	hypothetical protein	bi	1	217	fig|573.2207.peg.217	100	hypothetical protein	-				0		-				0		-				0
1	197	1088	fig|573.1888.peg.197	Phage tail length tape-measure protein 1	bi	1	218	fig|573.2207.peg.218	100	Phage tail length tape-measure protein 1	-				0		-				0		uni	1	1239	fig|573.2241.peg.1239	49.57	Phage tail length tape-measure protein 1
1	198	78	fig|573.1888.peg.198	Phage protein	bi	1	219	fig|573.2207.peg.219	100	Phage protein	-				0		-				0		bi	1	1240	fig|573.2241.peg.1240	98.7	Phage protein
1	199	157	fig|573.1888.peg.199	Phage protein	bi	1	220	fig|573.2207.peg.220	100	Phage protein	-				0		-				0		bi	1	1241	fig|573.2241.peg.1241	97.81	Phage protein
1	200	132	fig|573.1888.peg.200	Phage protein	bi	1	221	fig|573.2207.peg.221	100	Phage protein	-				0		-				0		bi	1	1242	fig|573.2241.peg.1242	93.89	Phage protein
1	201	826	fig|573.1888.peg.201	FIG00553532: hypothetical protein	bi	1	222	fig|573.2207.peg.222	100	FIG00553532: hypothetical protein	uni	1	137	fig|573.2212.peg.137	26.07	FIG00731921: hypothetical protein	-				0		bi	1	1243	fig|573.2241.peg.1243	98.42	FIG00553532: hypothetical protein
1	202	701	fig|573.1888.peg.202	FIG00644701: hypothetical protein	bi	1	223	fig|573.2207.peg.223	100	FIG00644701: hypothetical protein	uni	1	4799	fig|573.2212.peg.4799	92.84	Endo-1,4-beta-xylanase Z precursor (EC 3.2.1.8)	-				0		bi	1	1244	fig|573.2241.peg.1244	81.25	FIG00644701: hypothetical protein
1	203	78	fig|573.1888.peg.203	hypothetical protein	bi	1	224	fig|573.2207.peg.224	100	hypothetical protein	bi	1	4036	fig|573.2212.peg.4036	84.42	hypothetical protein	-				0		-				0
1	204	65	fig|573.1888.peg.204	hypothetical protein	bi	1	225	fig|573.2207.peg.225	100	hypothetical protein	bi	1	4800	fig|573.2212.peg.4800	100	hypothetical protein	-				0		-				0
1	205	495	fig|573.1888.peg.205	hypothetical protein	uni	1	1425	fig|573.2207.peg.1425	100	Retron-type RNA-directed DNA polymerase (EC 2.7.7.49)	uni	1	4122	fig|573.2212.peg.4122	22.94	Retron-type RNA-directed DNA polymerase (EC 2.7.7.49)	uni	1	3571	fig|573.2215.peg.3571	100	Retron-type RNA-directed DNA polymerase (EC 2.7.7.49)	uni	1	1655	fig|573.2241.peg.1655	100	hypothetical protein
1	206	80	fig|573.1888.peg.206	hypothetical protein	bi	1	1424	fig|573.2207.peg.1424	100	hypothetical protein	-				0		-				0		bi	1	1247	fig|573.2241.peg.1247	84.81	hypothetical protein
1	207	189	fig|573.1888.peg.207	Nicotinamidase/isochorismatase family protein	bi	1	1423	fig|573.2207.peg.1423	100	Nicotinamidase/isochorismatase family protein	bi	1	192	fig|573.2212.peg.192	100	Nicotinamidase/isochorismatase family protein	bi	1	4780	fig|573.2215.peg.4780	100	Nicotinamidase/isochorismatase family protein	bi	1	3291	fig|573.2241.peg.3291	100	Nicotinamidase/isochorismatase family protein
1	208	596	fig|573.1888.peg.208	Aspartyl-tRNA synthetase (EC 6.1.1.12)	bi	1	1422	fig|573.2207.peg.1422	100	Aspartyl-tRNA synthetase (EC 6.1.1.12)	bi	1	193	fig|573.2212.peg.193	99.83	Aspartyl-tRNA synthetase (EC 6.1.1.12)	bi	1	4779	fig|573.2215.peg.4779	99.83	Aspartyl-tRNA synthetase (EC 6.1.1.12)	bi	1	3290	fig|573.2241.peg.3290	99.83	Aspartyl-tRNA synthetase (EC 6.1.1.12)
1	209	148	fig|573.1888.peg.209	Dihydroneopterin triphosphate pyrophosphohydrolase type 2 (nudB)	bi	1	1421	fig|573.2207.peg.1421	100	Dihydroneopterin triphosphate pyrophosphohydrolase type 2 (nudB)	bi	1	194	fig|573.2212.peg.194	100	Dihydroneopterin triphosphate pyrophosphohydrolase type 2 (nudB)	bi	1	4778	fig|573.2215.peg.4778	100	Dihydroneopterin triphosphate pyrophosphohydrolase type 2 (nudB)	bi	1	3289	fig|573.2241.peg.3289	99.32	Dihydroneopterin triphosphate pyrophosphohydrolase type 2 (nudB)
1	210	247	fig|573.1888.peg.210	FIG000859: hypothetical protein YebC	bi	1	1420	fig|573.2207.peg.1420	100	FIG000859: hypothetical protein YebC	bi	1	195	fig|573.2212.peg.195	100	FIG000859: hypothetical protein YebC	bi	1	4777	fig|573.2215.peg.4777	100	FIG000859: hypothetical protein YebC	bi	1	3288	fig|573.2241.peg.3288	100	FIG000859: hypothetical protein YebC
1	211	174	fig|573.1888.peg.211	Crossover junction endodeoxyribonuclease RuvC (EC 3.1.22.4)	bi	1	1419	fig|573.2207.peg.1419	100	Crossover junction endodeoxyribonuclease RuvC (EC 3.1.22.4)	bi	1	196	fig|573.2212.peg.196	100	Crossover junction endodeoxyribonuclease RuvC (EC 3.1.22.4)	bi	1	4776	fig|573.2215.peg.4776	100	Crossover junction endodeoxyribonuclease RuvC (EC 3.1.22.4)	bi	1	3287	fig|573.2241.peg.3287	99.42	Crossover junction endodeoxyribonuclease RuvC (EC 3.1.22.4)
1	212	204	fig|573.1888.peg.212	Holliday junction DNA helicase RuvA	bi	1	1418	fig|573.2207.peg.1418	100	Holliday junction DNA helicase RuvA	bi	1	197	fig|573.2212.peg.197	100	Holliday junction DNA helicase RuvA	bi	1	4775	fig|573.2215.peg.4775	100	Holliday junction DNA helicase RuvA	bi	1	3286	fig|573.2241.peg.3286	100	Holliday junction DNA helicase RuvA
1	213	337	fig|573.1888.peg.213	Holliday junction DNA helicase RuvB	bi	1	1417	fig|573.2207.peg.1417	100	Holliday junction DNA helicase RuvB	bi	1	198	fig|573.2212.peg.198	100	Holliday junction DNA helicase RuvB	bi	1	4774	fig|573.2215.peg.4774	100	Holliday junction DNA helicase RuvB	bi	1	3285	fig|573.2241.peg.3285	100	Holliday junction DNA helicase RuvB
1	214	262	fig|573.1888.peg.214	Zinc ABC transporter, inner membrane permease protein ZnuB	bi	1	1416	fig|573.2207.peg.1416	100	Zinc ABC transporter, inner membrane permease protein ZnuB	bi	1	199	fig|573.2212.peg.199	100	Zinc ABC transporter, inner membrane permease protein ZnuB	bi	1	4773	fig|573.2215.peg.4773	100	Zinc ABC transporter, inner membrane permease protein ZnuB	bi	1	3284	fig|573.2241.peg.3284	99.23	Zinc ABC transporter, inner membrane permease protein ZnuB
1	215	251	fig|573.1888.peg.215	Zinc ABC transporter, ATP-binding protein ZnuC	bi	1	1415	fig|573.2207.peg.1415	100	Zinc ABC transporter, ATP-binding protein ZnuC	bi	1	200	fig|573.2212.peg.200	100	Zinc ABC transporter, ATP-binding protein ZnuC	bi	1	4772	fig|573.2215.peg.4772	100	Zinc ABC transporter, ATP-binding protein ZnuC	bi	1	3283	fig|573.2241.peg.3283	100	Zinc ABC transporter, ATP-binding protein ZnuC
1	216	315	fig|573.1888.peg.216	Zinc ABC transporter, periplasmic-binding protein ZnuA	bi	1	1414	fig|573.2207.peg.1414	100	Zinc ABC transporter, periplasmic-binding protein ZnuA	bi	1	201	fig|573.2212.peg.201	100	Zinc ABC transporter, periplasmic-binding protein ZnuA	bi	1	4771	fig|573.2215.peg.4771	100	Zinc ABC transporter, periplasmic-binding protein ZnuA	bi	1	3282	fig|573.2241.peg.3282	100	Zinc ABC transporter, periplasmic-binding protein ZnuA
1	217	440	fig|573.1888.peg.217	Cell wall endopeptidase, family M23/M37	bi	1	1413	fig|573.2207.peg.1413	100	Cell wall endopeptidase, family M23/M37	bi	1	202	fig|573.2212.peg.202	100	Cell wall endopeptidase, family M23/M37	bi	1	4770	fig|573.2215.peg.4770	100	Cell wall endopeptidase, family M23/M37	bi	1	3281	fig|573.2241.peg.3281	100	Cell wall endopeptidase, family M23/M37
1	218	325	fig|573.1888.peg.218	Lipid A biosynthesis (KDO) 2-(lauroyl)-lipid IVA acyltransferase (EC 2.3.1.-)	bi	1	1412	fig|573.2207.peg.1412	100	Lipid A biosynthesis (KDO) 2-(lauroyl)-lipid IVA acyltransferase (EC 2.3.1.-)	bi	1	203	fig|573.2212.peg.203	100	Lipid A biosynthesis (KDO) 2-(lauroyl)-lipid IVA acyltransferase (EC 2.3.1.-)	bi	1	4769	fig|573.2215.peg.4769	100	Lipid A biosynthesis (KDO) 2-(lauroyl)-lipid IVA acyltransferase (EC 2.3.1.-)	bi	1	3280	fig|573.2241.peg.3280	100	Lipid A biosynthesis (KDO) 2-(lauroyl)-lipid IVA acyltransferase (EC 2.3.1.-)
1	219	481	fig|573.1888.peg.219	Pyruvate kinase (EC 2.7.1.40)	bi	1	1411	fig|573.2207.peg.1411	100	Pyruvate kinase (EC 2.7.1.40)	bi	1	204	fig|573.2212.peg.204	100	Pyruvate kinase (EC 2.7.1.40)	bi	1	4768	fig|573.2215.peg.4768	100	Pyruvate kinase (EC 2.7.1.40)	bi	1	3279	fig|573.2241.peg.3279	100	Pyruvate kinase (EC 2.7.1.40)
1	220	302	fig|573.1888.peg.220	Phosphogluconate repressor HexR, RpiR family	bi	1	1410	fig|573.2207.peg.1410	100	Phosphogluconate repressor HexR, RpiR family	bi	1	205	fig|573.2212.peg.205	100	Phosphogluconate repressor HexR, RpiR family	bi	1	4767	fig|573.2215.peg.4767	100	Phosphogluconate repressor HexR, RpiR family	bi	1	3278	fig|573.2241.peg.3278	100	Phosphogluconate repressor HexR, RpiR family
1	221	50	fig|573.1888.peg.221	hypothetical protein	bi	1	1409	fig|573.2207.peg.1409	100	hypothetical protein	bi	1	206	fig|573.2212.peg.206	100	hypothetical protein	bi	1	4766	fig|573.2215.peg.4766	100	hypothetical protein	bi	1	3277	fig|573.2241.peg.3277	100	hypothetical protein
1	222	492	fig|573.1888.peg.222	Glucose-6-phosphate 1-dehydrogenase (EC 1.1.1.49)	bi	1	1408	fig|573.2207.peg.1408	100	Glucose-6-phosphate 1-dehydrogenase (EC 1.1.1.49)	bi	1	207	fig|573.2212.peg.207	100	Glucose-6-phosphate 1-dehydrogenase (EC 1.1.1.49)	bi	1	4765	fig|573.2215.peg.4765	100	Glucose-6-phosphate 1-dehydrogenase (EC 1.1.1.49)	bi	1	3276	fig|573.2241.peg.3276	100	Glucose-6-phosphate 1-dehydrogenase (EC 1.1.1.49)
1	223	604	fig|573.1888.peg.223	Phosphogluconate dehydratase (EC 4.2.1.12)	bi	1	1407	fig|573.2207.peg.1407	100	Phosphogluconate dehydratase (EC 4.2.1.12)	bi	1	208	fig|573.2212.peg.208	100	Phosphogluconate dehydratase (EC 4.2.1.12)	bi	1	4764	fig|573.2215.peg.4764	100	Phosphogluconate dehydratase (EC 4.2.1.12)	bi	1	3275	fig|573.2241.peg.3275	99.83	Phosphogluconate dehydratase (EC 4.2.1.12)
1	224	214	fig|573.1888.peg.224	4-hydroxy-2-oxoglutarate aldolase (EC 4.1.3.16) @ 2-dehydro-3-deoxyphosphogluconate aldolase (EC 4.1.2.14)	bi	1	1406	fig|573.2207.peg.1406	100	4-hydroxy-2-oxoglutarate aldolase (EC 4.1.3.16) @ 2-dehydro-3-deoxyphosphogluconate aldolase (EC 4.1.2.14)	bi	1	209	fig|573.2212.peg.209	100	4-hydroxy-2-oxoglutarate aldolase (EC 4.1.3.16) @ 2-dehydro-3-deoxyphosphogluconate aldolase (EC 4.1.2.14)	bi	1	4763	fig|573.2215.peg.4763	100	4-hydroxy-2-oxoglutarate aldolase (EC 4.1.3.16) @ 2-dehydro-3-deoxyphosphogluconate aldolase (EC 4.1.2.14)	bi	1	3274	fig|573.2241.peg.3274	100	4-hydroxy-2-oxoglutarate aldolase (EC 4.1.3.16) @ 2-dehydro-3-deoxyphosphogluconate aldolase (EC 4.1.2.14)
1	225	393	fig|573.1888.peg.225	Phosphoribosylglycinamide formyltransferase 2 (EC 2.1.2.-)	bi	1	1405	fig|573.2207.peg.1405	100	Phosphoribosylglycinamide formyltransferase 2 (EC 2.1.2.-)	bi	1	210	fig|573.2212.peg.210	100	Phosphoribosylglycinamide formyltransferase 2 (EC 2.1.2.-)	bi	1	4762	fig|573.2215.peg.4762	100	Phosphoribosylglycinamide formyltransferase 2 (EC 2.1.2.-)	bi	1	3273	fig|573.2241.peg.3273	99.23	Phosphoribosylglycinamide formyltransferase 2 (EC 2.1.2.-)
1	226	116	fig|573.1888.peg.226	DNA damage-inducible gene in SOS regulon, dependent on cyclic AMP and H-NS	bi	1	1404	fig|573.2207.peg.1404	100	DNA damage-inducible gene in SOS regulon, dependent on cyclic AMP and H-NS	bi	1	211	fig|573.2212.peg.211	100	DNA damage-inducible gene in SOS regulon, dependent on cyclic AMP and H-NS	bi	1	4761	fig|573.2215.peg.4761	100	DNA damage-inducible gene in SOS regulon, dependent on cyclic AMP and H-NS	bi	1	3272	fig|573.2241.peg.3272	99.13	DNA damage-inducible gene in SOS regulon, dependent on cyclic AMP and H-NS
1	227	220	fig|573.1888.peg.227	FIG004088: inner membrane protein YebE	bi	1	1403	fig|573.2207.peg.1403	100	FIG004088: inner membrane protein YebE	bi	1	212	fig|573.2212.peg.212	100	FIG004088: inner membrane protein YebE	bi	1	4760	fig|573.2215.peg.4760	100	FIG004088: inner membrane protein YebE	bi	1	3271	fig|573.2241.peg.3271	99.09	FIG004088: inner membrane protein YebE
1	228	676	fig|573.1888.peg.228	Protease II (EC 3.4.21.83)	bi	1	1402	fig|573.2207.peg.1402	99.85	Protease II (EC 3.4.21.83)	bi	1	213	fig|573.2212.peg.213	99.85	Protease II (EC 3.4.21.83)	bi	1	4759	fig|573.2215.peg.4759	99.85	Protease II (EC 3.4.21.83)	bi	1	3270	fig|573.2241.peg.3270	99.85	Protease II (EC 3.4.21.83)
1	229	220	fig|573.1888.peg.229	Exodeoxyribonuclease X (EC 3.1.11.-)	bi	1	1401	fig|573.2207.peg.1401	100	Exodeoxyribonuclease X (EC 3.1.11.-)	bi	1	214	fig|573.2212.peg.214	99.54	Exodeoxyribonuclease X (EC 3.1.11.-)	bi	1	4758	fig|573.2215.peg.4758	99.09	Exodeoxyribonuclease X (EC 3.1.11.-)	bi	1	3269	fig|573.2241.peg.3269	98.17	Exodeoxyribonuclease X (EC 3.1.11.-)
1	230	77	fig|573.1888.peg.230	DNA polymerase III theta subunit (EC 2.7.7.7)	bi	1	1400	fig|573.2207.peg.1400	100	DNA polymerase III theta subunit (EC 2.7.7.7)	bi	1	215	fig|573.2212.peg.215	100	DNA polymerase III theta subunit (EC 2.7.7.7)	bi	1	4757	fig|573.2215.peg.4757	100	DNA polymerase III theta subunit (EC 2.7.7.7)	bi	1	3268	fig|573.2241.peg.3268	100	DNA polymerase III theta subunit (EC 2.7.7.7)
1	231	125	fig|573.1888.peg.231	Copper resistance protein CopC	bi	1	1399	fig|573.2207.peg.1399	100	Copper resistance protein CopC	bi	1	216	fig|573.2212.peg.216	100	Copper resistance protein CopC	bi	1	4756	fig|573.2215.peg.4756	100	Copper resistance protein CopC	bi	1	3267	fig|573.2241.peg.3267	100	Copper resistance protein CopC
1	232	290	fig|573.1888.peg.232	Copper resistance protein D	bi	1	1398	fig|573.2207.peg.1398	100	Copper resistance protein D	bi	1	217	fig|573.2212.peg.217	100	Copper resistance protein D	bi	1	4755	fig|573.2215.peg.4755	100	Copper resistance protein D	bi	1	3266	fig|573.2241.peg.3266	98.96	Copper resistance protein D
1	233	113	fig|573.1888.peg.233	FIG00923183: possible membrane protein YebY	bi	1	1397	fig|573.2207.peg.1397	100	FIG00923183: possible membrane protein YebY	bi	1	218	fig|573.2212.peg.218	100	FIG00923183: possible membrane protein YebY	bi	1	4754	fig|573.2215.peg.4754	100	FIG00923183: possible membrane protein YebY	bi	1	3265	fig|573.2241.peg.3265	99.11	FIG00923183: possible membrane protein YebY
1	234	48	fig|573.1888.peg.234	hypothetical protein	bi	1	1396	fig|573.2207.peg.1396	100	hypothetical protein	bi	1	219	fig|573.2212.peg.219	100	hypothetical protein	bi	1	4753	fig|573.2215.peg.4753	100	hypothetical protein	bi	1	3264	fig|573.2241.peg.3264	100	hypothetical protein
1	235	323	fig|573.1888.peg.235	Virulence factor VirK	bi	1	1395	fig|573.2207.peg.1395	99.69	Virulence factor VirK	bi	1	220	fig|573.2212.peg.220	100	Virulence factor VirK	bi	1	4752	fig|573.2215.peg.4752	99.69	Virulence factor VirK	bi	1	3263	fig|573.2241.peg.3263	99.69	Virulence factor VirK
1	236	218	fig|573.1888.peg.236	Ren protein	bi	1	1394	fig|573.2207.peg.1394	100	Ren protein	bi	1	221	fig|573.2212.peg.221	100	Ren protein	bi	1	4751	fig|573.2215.peg.4751	100	Ren protein	bi	1	3262	fig|573.2241.peg.3262	98.16	Ren protein
1	237	64	fig|573.1888.peg.237	FIG00732534: hypothetical protein	bi	1	1393	fig|573.2207.peg.1393	100	FIG00732534: hypothetical protein	bi	1	222	fig|573.2212.peg.222	100	FIG00732534: hypothetical protein	bi	1	4750	fig|573.2215.peg.4750	100	FIG00732534: hypothetical protein	bi	1	3261	fig|573.2241.peg.3261	100	FIG00732534: hypothetical protein
1	238	103	fig|573.1888.peg.238	FIG00731406: hypothetical protein	bi	1	1392	fig|573.2207.peg.1392	100	FIG00731406: hypothetical protein	bi	1	223	fig|573.2212.peg.223	100	FIG00731406: hypothetical protein	bi	1	4749	fig|573.2215.peg.4749	100	FIG00731406: hypothetical protein	bi	1	3260	fig|573.2241.peg.3260	100	FIG00731406: hypothetical protein
1	239	478	fig|573.1888.peg.239	tRNA/RNA cytosine-C5-methylase (EC 2.1.1.-)	bi	1	1391	fig|573.2207.peg.1391	100	tRNA/RNA cytosine-C5-methylase (EC 2.1.1.-)	bi	1	224	fig|573.2212.peg.224	100	tRNA/RNA cytosine-C5-methylase (EC 2.1.1.-)	bi	1	4748	fig|573.2215.peg.4748	100	tRNA/RNA cytosine-C5-methylase (EC 2.1.1.-)	bi	1	3259	fig|573.2241.peg.3259	100	tRNA/RNA cytosine-C5-methylase (EC 2.1.1.-)
1	240	878	fig|573.1888.peg.240	Paraquat-inducible protein B	bi	1	1390	fig|573.2207.peg.1390	100	Paraquat-inducible protein B	bi	1	225	fig|573.2212.peg.225	100	Paraquat-inducible protein B	bi	1	4747	fig|573.2215.peg.4747	100	Paraquat-inducible protein B	bi	1	3258	fig|573.2241.peg.3258	100	Paraquat-inducible protein B
1	241	428	fig|573.1888.peg.241	Paraquat-inducible protein A	bi	1	1389	fig|573.2207.peg.1389	100	Paraquat-inducible protein A	bi	1	226	fig|573.2212.peg.226	99.76	Paraquat-inducible protein A	bi	1	4746	fig|573.2215.peg.4746	100	Paraquat-inducible protein A	bi	1	3257	fig|573.2241.peg.3257	100	Paraquat-inducible protein A
1	242	166	fig|573.1888.peg.242	Free methionine-(R)-sulfoxide reductase, contains GAF domain	bi	1	1388	fig|573.2207.peg.1388	100	Free methionine-(R)-sulfoxide reductase, contains GAF domain	bi	1	227	fig|573.2212.peg.227	100	Free methionine-(R)-sulfoxide reductase, contains GAF domain	bi	1	4745	fig|573.2215.peg.4745	100	Free methionine-(R)-sulfoxide reductase, contains GAF domain	bi	1	3256	fig|573.2241.peg.3256	100	Free methionine-(R)-sulfoxide reductase, contains GAF domain
1	243	226	fig|573.1888.peg.243	ProQ: influences osmotic activation of compatible solute ProP	bi	1	1387	fig|573.2207.peg.1387	100	ProQ: influences osmotic activation of compatible solute ProP	bi	1	228	fig|573.2212.peg.228	100	ProQ: influences osmotic activation of compatible solute ProP	bi	1	4744	fig|573.2215.peg.4744	100	ProQ: influences osmotic activation of compatible solute ProP	bi	1	3255	fig|573.2241.peg.3255	100	ProQ: influences osmotic activation of compatible solute ProP
1	244	683	fig|573.1888.peg.244	Tail-specific protease precursor (EC 3.4.21.102)	bi	1	1386	fig|573.2207.peg.1386	100	Tail-specific protease precursor (EC 3.4.21.102)	bi	1	229	fig|573.2212.peg.229	100	Tail-specific protease precursor (EC 3.4.21.102)	bi	1	4743	fig|573.2215.peg.4743	100	Tail-specific protease precursor (EC 3.4.21.102)	bi	1	3254	fig|573.2241.peg.3254	100	Tail-specific protease precursor (EC 3.4.21.102)
1	245	295	fig|573.1888.peg.245	Probable protease HtpX (EC 3.4.24.-)	bi	1	1385	fig|573.2207.peg.1385	100	Probable protease HtpX (EC 3.4.24.-)	bi	1	230	fig|573.2212.peg.230	100	Probable protease HtpX (EC 3.4.24.-)	bi	1	4742	fig|573.2215.peg.4742	100	Probable protease HtpX (EC 3.4.24.-)	bi	1	3253	fig|573.2241.peg.3253	100	Probable protease HtpX (EC 3.4.24.-)
1	246	461	fig|573.1888.peg.246	Putative transport protein	bi	1	1384	fig|573.2207.peg.1384	100	Putative transport protein	bi	1	231	fig|573.2212.peg.231	100	Putative transport protein	bi	1	4741	fig|573.2215.peg.4741	100	Putative transport protein	bi	1	3252	fig|573.2241.peg.3252	99.77	Putative transport protein
1	247	264	fig|573.1888.peg.247	Transcriptional regulator KdgR, KDG operon repressor	bi	1	1383	fig|573.2207.peg.1383	100	Transcriptional regulator KdgR, KDG operon repressor	bi	1	232	fig|573.2212.peg.232	100	Transcriptional regulator KdgR, KDG operon repressor	bi	1	4740	fig|573.2215.peg.4740	100	Transcriptional regulator KdgR, KDG operon repressor	bi	1	3251	fig|573.2241.peg.3251	100	Transcriptional regulator KdgR, KDG operon repressor
1	248	80	fig|573.1888.peg.248	putative exported protein	bi	1	1382	fig|573.2207.peg.1382	100	putative exported protein	bi	1	233	fig|573.2212.peg.233	98.18	putative exported protein	bi	1	4739	fig|573.2215.peg.4739	100	putative exported protein	bi	1	3250	fig|573.2241.peg.3250	100	putative exported protein
1	249	48	fig|573.1888.peg.249	Putative inner membrane protein	-				0		-				0		-				0		-				0
1	250	97	fig|573.1888.peg.250	FIG00731922: hypothetical protein	bi	1	1380	fig|573.2207.peg.1380	100	FIG00731922: hypothetical protein	bi	1	235	fig|573.2212.peg.235	98.96	FIG00731922: hypothetical protein	bi	1	4737	fig|573.2215.peg.4737	100	FIG00731922: hypothetical protein	bi	1	3248	fig|573.2241.peg.3248	98.72	FIG00731922: hypothetical protein
1	251	70	fig|573.1888.peg.251	Cold shock protein CspC	bi	1	1378	fig|573.2207.peg.1378	100	Cold shock protein CspC	bi	1	236	fig|573.2212.peg.236	100	Cold shock protein CspC	bi	1	4735	fig|573.2215.peg.4735	100	Cold shock protein CspC	bi	1	3246	fig|573.2241.peg.3246	100	Cold shock protein CspC
1	252	583	fig|573.1888.peg.252	Cell division protein FtsI [Peptidoglycan synthetase] (EC 2.4.1.129)	bi	1	1377	fig|573.2207.peg.1377	99.83	Cell division protein FtsI [Peptidoglycan synthetase] (EC 2.4.1.129)	bi	1	237	fig|573.2212.peg.237	100	Cell division protein FtsI [Peptidoglycan synthetase] (EC 2.4.1.129)	bi	1	4734	fig|573.2215.peg.4734	99.83	Cell division protein FtsI [Peptidoglycan synthetase] (EC 2.4.1.129)	bi	1	3245	fig|573.2241.peg.3245	99.83	Cell division protein FtsI [Peptidoglycan synthetase] (EC 2.4.1.129)
1	253	265	fig|573.1888.peg.253	Ribosomal RNA large subunit methyltransferase A (EC 2.1.1.51)	bi	1	1376	fig|573.2207.peg.1376	100	Ribosomal RNA large subunit methyltransferase A (EC 2.1.1.51)	bi	1	238	fig|573.2212.peg.238	100	Ribosomal RNA large subunit methyltransferase A (EC 2.1.1.51)	bi	1	4733	fig|573.2215.peg.4733	100	Ribosomal RNA large subunit methyltransferase A (EC 2.1.1.51)	bi	1	3244	fig|573.2241.peg.3244	100	Ribosomal RNA large subunit methyltransferase A (EC 2.1.1.51)
1	254	189	fig|573.1888.peg.254	Putative membrane protein	bi	1	1375	fig|573.2207.peg.1375	100	Putative membrane protein	bi	1	239	fig|573.2212.peg.239	100	Putative membrane protein	bi	1	4732	fig|573.2215.peg.4732	100	Putative membrane protein	bi	1	3243	fig|573.2241.peg.3243	100	Putative membrane protein
1	255	153	fig|573.1888.peg.255	FIG00510464: hypothetical protein	bi	1	1374	fig|573.2207.peg.1374	100	FIG00510464: hypothetical protein	bi	1	240	fig|573.2212.peg.240	100	FIG00510464: hypothetical protein	bi	1	4731	fig|573.2215.peg.4731	100	FIG00510464: hypothetical protein	bi	1	3242	fig|573.2241.peg.3242	100	FIG00510464: hypothetical protein
1	256	284	fig|573.1888.peg.256	PTS system, mannose-specific IID component	bi	1	1373	fig|573.2207.peg.1373	100	PTS system, mannose-specific IID component	bi	1	241	fig|573.2212.peg.241	100	PTS system, mannose-specific IID component	bi	1	4730	fig|573.2215.peg.4730	100	PTS system, mannose-specific IID component	bi	1	3241	fig|573.2241.peg.3241	100	PTS system, mannose-specific IID component
1	257	267	fig|573.1888.peg.257	PTS system, mannose-specific IIC component	bi	1	1372	fig|573.2207.peg.1372	100	PTS system, mannose-specific IIC component	bi	1	242	fig|573.2212.peg.242	100	PTS system, mannose-specific IIC component	bi	1	4729	fig|573.2215.peg.4729	100	PTS system, mannose-specific IIC component	bi	1	3240	fig|573.2241.peg.3240	100	PTS system, mannose-specific IIC component
1	258	324	fig|573.1888.peg.258	PTS system, mannose-specific IIA component (EC 2.7.1.69) / PTS system, mannose-specific IIB component (EC 2.7.1.69)	bi	1	1371	fig|573.2207.peg.1371	100	PTS system, mannose-specific IIA component (EC 2.7.1.69) / PTS system, mannose-specific IIB component (EC 2.7.1.69)	bi	1	243	fig|573.2212.peg.243	100	PTS system, mannose-specific IIA component (EC 2.7.1.69) / PTS system, mannose-specific IIB component (EC 2.7.1.69)	bi	1	4728	fig|573.2215.peg.4728	100	PTS system, mannose-specific IIA component (EC 2.7.1.69) / PTS system, mannose-specific IIB component (EC 2.7.1.69)	bi	1	3239	fig|573.2241.peg.3239	100	PTS system, mannose-specific IIA component (EC 2.7.1.69) / PTS system, mannose-specific IIB component (EC 2.7.1.69)
1	259	516	fig|573.1888.peg.259	Magnesium and cobalt efflux protein CorC	bi	1	1370	fig|573.2207.peg.1370	100	Magnesium and cobalt efflux protein CorC	bi	1	244	fig|573.2212.peg.244	100	Magnesium and cobalt efflux protein CorC	bi	1	4727	fig|573.2215.peg.4727	100	Magnesium and cobalt efflux protein CorC	bi	1	3238	fig|573.2241.peg.3238	100	Magnesium and cobalt efflux protein CorC
1	260	526	fig|573.1888.peg.260	Rtn protein	bi	1	1369	fig|573.2207.peg.1369	100	Rtn protein	bi	1	245	fig|573.2212.peg.245	99.81	Rtn protein	bi	1	4726	fig|573.2215.peg.4726	100	Rtn protein	bi	1	3237	fig|573.2241.peg.3237	99.61	Rtn protein
1	261	433	fig|573.1888.peg.261	L-serine dehydratase, beta subunit (EC 4.3.1.17) / L-serine dehydratase, alpha subunit (EC 4.3.1.17)	bi	1	1368	fig|573.2207.peg.1368	100	L-serine dehydratase, beta subunit (EC 4.3.1.17) / L-serine dehydratase, alpha subunit (EC 4.3.1.17)	bi	1	246	fig|573.2212.peg.246	100	L-serine dehydratase, beta subunit (EC 4.3.1.17) / L-serine dehydratase, alpha subunit (EC 4.3.1.17)	bi	1	4725	fig|573.2215.peg.4725	100	L-serine dehydratase, beta subunit (EC 4.3.1.17) / L-serine dehydratase, alpha subunit (EC 4.3.1.17)	bi	1	3236	fig|573.2241.peg.3236	100	L-serine dehydratase, beta subunit (EC 4.3.1.17) / L-serine dehydratase, alpha subunit (EC 4.3.1.17)
1	262	193	fig|573.1888.peg.262	Hypothetical nudix hydrolase YeaB	bi	1	1367	fig|573.2207.peg.1367	100	Hypothetical nudix hydrolase YeaB	bi	1	247	fig|573.2212.peg.247	100	Hypothetical nudix hydrolase YeaB	bi	1	4724	fig|573.2215.peg.4724	100	Hypothetical nudix hydrolase YeaB	bi	1	3235	fig|573.2241.peg.3235	100	Hypothetical nudix hydrolase YeaB
1	263	452	fig|573.1888.peg.263	Para-aminobenzoate synthase, aminase component (EC 2.6.1.85)	bi	1	1366	fig|573.2207.peg.1366	100	Para-aminobenzoate synthase, aminase component (EC 2.6.1.85)	bi	1	248	fig|573.2212.peg.248	100	Para-aminobenzoate synthase, aminase component (EC 2.6.1.85)	bi	1	4723	fig|573.2215.peg.4723	100	Para-aminobenzoate synthase, aminase component (EC 2.6.1.85)	bi	1	3234	fig|573.2241.peg.3234	99.56	Para-aminobenzoate synthase, aminase component (EC 2.6.1.85)
1	264	60	fig|573.1888.peg.264	FIG00638134: hypothetical protein	bi	1	1365	fig|573.2207.peg.1365	100	FIG00638134: hypothetical protein	bi	1	249	fig|573.2212.peg.249	100	FIG00638134: hypothetical protein	bi	1	4722	fig|573.2215.peg.4722	100	FIG00638134: hypothetical protein	bi	1	3233	fig|573.2241.peg.3233	100	FIG00638134: hypothetical protein
1	265	122	fig|573.1888.peg.265	RidA/YER057c/UK114 superfamily, group 2, YoaB-like protein	bi	1	1364	fig|573.2207.peg.1364	100	RidA/YER057c/UK114 superfamily, group 2, YoaB-like protein	bi	1	250	fig|573.2212.peg.250	100	RidA/YER057c/UK114 superfamily, group 2, YoaB-like protein	bi	1	4721	fig|573.2215.peg.4721	100	RidA/YER057c/UK114 superfamily, group 2, YoaB-like protein	bi	1	3232	fig|573.2241.peg.3232	100	RidA/YER057c/UK114 superfamily, group 2, YoaB-like protein
1	266	637	fig|573.1888.peg.266	DinG family ATP-dependent helicase YoaA	bi	1	1363	fig|573.2207.peg.1363	99.84	DinG family ATP-dependent helicase YoaA	bi	1	251	fig|573.2212.peg.251	100	DinG family ATP-dependent helicase YoaA	bi	1	4720	fig|573.2215.peg.4720	99.69	DinG family ATP-dependent helicase YoaA	bi	1	3231	fig|573.2241.peg.3231	100	DinG family ATP-dependent helicase YoaA
1	267	232	fig|573.1888.peg.267	TsaB protein, required for threonylcarbamoyladenosine (t(6)A) formation in tRNA	bi	1	1362	fig|573.2207.peg.1362	100	TsaB protein, required for threonylcarbamoyladenosine (t(6)A) formation in tRNA	bi	1	252	fig|573.2212.peg.252	100	TsaB protein, required for threonylcarbamoyladenosine (t(6)A) formation in tRNA	bi	1	4719	fig|573.2215.peg.4719	99.57	TsaB protein, required for threonylcarbamoyladenosine (t(6)A) formation in tRNA	bi	1	3230	fig|573.2241.peg.3230	99.13	TsaB protein, required for threonylcarbamoyladenosine (t(6)A) formation in tRNA
1	268	215	fig|573.1888.peg.268	Starvation lipoprotein Slp paralog	bi	1	1360	fig|573.2207.peg.1360	98.73	Starvation lipoprotein Slp paralog	bi	1	253	fig|573.2212.peg.253	98.96	Starvation lipoprotein Slp paralog	bi	1	4718	fig|573.2215.peg.4718	98.96	Starvation lipoprotein Slp paralog	bi	1	3229	fig|573.2241.peg.3229	98.96	Starvation lipoprotein Slp paralog
1	269	562	fig|573.1888.peg.269	Long-chain-fatty-acid--CoA ligase (EC 6.2.1.3)	bi	1	1359	fig|573.2207.peg.1359	100	Long-chain-fatty-acid--CoA ligase (EC 6.2.1.3)	bi	1	254	fig|573.2212.peg.254	100	Long-chain-fatty-acid--CoA ligase (EC 6.2.1.3)	bi	1	4717	fig|573.2215.peg.4717	100	Long-chain-fatty-acid--CoA ligase (EC 6.2.1.3)	bi	1	3228	fig|573.2241.peg.3228	99.82	Long-chain-fatty-acid--CoA ligase (EC 6.2.1.3)
1	270	376	fig|573.1888.peg.270	Ribonuclease D (EC 3.1.26.3)	bi	1	1358	fig|573.2207.peg.1358	100	Ribonuclease D (EC 3.1.26.3)	bi	1	255	fig|573.2212.peg.255	100	Ribonuclease D (EC 3.1.26.3)	bi	1	4716	fig|573.2215.peg.4716	98.65	Ribonuclease D (EC 3.1.26.3)	bi	1	3227	fig|573.2241.peg.3227	99.2	Ribonuclease D (EC 3.1.26.3)
1	271	90	fig|573.1888.peg.271	Cell division topological specificity factor MinE	bi	1	1357	fig|573.2207.peg.1357	100	Cell division topological specificity factor MinE	bi	1	256	fig|573.2212.peg.256	100	Cell division topological specificity factor MinE	bi	1	4715	fig|573.2215.peg.4715	100	Cell division topological specificity factor MinE	bi	1	3226	fig|573.2241.peg.3226	100	Cell division topological specificity factor MinE
1	272	271	fig|573.1888.peg.272	Septum site-determining protein MinD	bi	1	1356	fig|573.2207.peg.1356	100	Septum site-determining protein MinD	bi	1	257	fig|573.2212.peg.257	100	Septum site-determining protein MinD	bi	1	4714	fig|573.2215.peg.4714	100	Septum site-determining protein MinD	bi	1	3225	fig|573.2241.peg.3225	100	Septum site-determining protein MinD
1	273	233	fig|573.1888.peg.273	Septum site-determining protein MinC	bi	1	1355	fig|573.2207.peg.1355	100	Septum site-determining protein MinC	bi	1	258	fig|573.2212.peg.258	99.57	Septum site-determining protein MinC	bi	1	4713	fig|573.2215.peg.4713	100	Septum site-determining protein MinC	bi	1	3224	fig|573.2241.peg.3224	99.57	Septum site-determining protein MinC
1	274	63	fig|573.1888.peg.274	Protein YcgL	bi	1	1354	fig|573.2207.peg.1354	100	Protein YcgL	bi	1	259	fig|573.2212.peg.259	100	Protein YcgL	bi	1	4712	fig|573.2215.peg.4712	100	Protein YcgL	bi	1	3223	fig|573.2241.peg.3223	100	Protein YcgL
1	275	220	fig|573.1888.peg.275	FIG094199: Fumarylacetoacetate hydrolase	bi	1	1353	fig|573.2207.peg.1353	100	FIG094199: Fumarylacetoacetate hydrolase	bi	1	260	fig|573.2212.peg.260	100	FIG094199: Fumarylacetoacetate hydrolase	bi	1	4711	fig|573.2215.peg.4711	99.54	FIG094199: Fumarylacetoacetate hydrolase	bi	1	3222	fig|573.2241.peg.3222	99.54	FIG094199: Fumarylacetoacetate hydrolase
1	276	149	fig|573.1888.peg.276	YcgN (Fragment)	bi	1	1352	fig|573.2207.peg.1352	100	YcgN (Fragment)	bi	1	261	fig|573.2212.peg.261	100	YcgN (Fragment)	bi	1	4710	fig|573.2215.peg.4710	100	YcgN (Fragment)	bi	1	3221	fig|573.2241.peg.3221	100	YcgN (Fragment)
1	277	115	fig|573.1888.peg.277	FIG074102: hypothetical protein	bi	1	1351	fig|573.2207.peg.1351	100	FIG074102: hypothetical protein	bi	1	262	fig|573.2212.peg.262	100	FIG074102: hypothetical protein	bi	1	4709	fig|573.2215.peg.4709	99.12	FIG074102: hypothetical protein	bi	1	3220	fig|573.2241.peg.3220	100	FIG074102: hypothetical protein
1	278	160	fig|573.1888.peg.278	Periplasmic thiol:disulfide oxidoreductase DsbB, required for DsbA reoxidation	bi	1	1350	fig|573.2207.peg.1350	100	Periplasmic thiol:disulfide oxidoreductase DsbB, required for DsbA reoxidation	bi	1	263	fig|573.2212.peg.263	100	Periplasmic thiol:disulfide oxidoreductase DsbB, required for DsbA reoxidation	bi	1	4708	fig|573.2215.peg.4708	99.37	Periplasmic thiol:disulfide oxidoreductase DsbB, required for DsbA reoxidation	bi	1	3219	fig|573.2241.peg.3219	99.37	Periplasmic thiol:disulfide oxidoreductase DsbB, required for DsbA reoxidation
1	279	517	fig|573.1888.peg.279	Na+/H+ antiporter NhaB	bi	1	1349	fig|573.2207.peg.1349	100	Na+/H+ antiporter NhaB	bi	1	264	fig|573.2212.peg.264	100	Na+/H+ antiporter NhaB	bi	1	4707	fig|573.2215.peg.4707	100	Na+/H+ antiporter NhaB	bi	1	3218	fig|573.2241.peg.3218	99.42	Na+/H+ antiporter NhaB
1	280	44	fig|573.1888.peg.280	hypothetical protein	bi	1	1348	fig|573.2207.peg.1348	100	hypothetical protein	bi	1	265	fig|573.2212.peg.265	100	hypothetical protein	bi	1	4706	fig|573.2215.peg.4706	100	hypothetical protein	bi	1	3217	fig|573.2241.peg.3217	97.67	hypothetical protein
1	281	240	fig|573.1888.peg.281	Transcriptional regulator for fatty acid degradation FadR, GntR family	bi	1	1347	fig|573.2207.peg.1347	100	Transcriptional regulator for fatty acid degradation FadR, GntR family	bi	1	266	fig|573.2212.peg.266	100	Transcriptional regulator for fatty acid degradation FadR, GntR family	bi	1	4705	fig|573.2215.peg.4705	100	Transcriptional regulator for fatty acid degradation FadR, GntR family	bi	1	3216	fig|573.2241.peg.3216	100	Transcriptional regulator for fatty acid degradation FadR, GntR family
1	282	511	fig|573.1888.peg.282	FIG004684: SpoVR-like protein	bi	1	1346	fig|573.2207.peg.1346	100	FIG004684: SpoVR-like protein	bi	1	267	fig|573.2212.peg.267	99.8	FIG004684: SpoVR-like protein	bi	1	4704	fig|573.2215.peg.4704	99.8	FIG004684: SpoVR-like protein	bi	1	3215	fig|573.2241.peg.3215	99.8	FIG004684: SpoVR-like protein
1	283	49	fig|573.1888.peg.283	hypothetical protein	bi	1	1345	fig|573.2207.peg.1345	100	hypothetical protein	bi	1	268	fig|573.2212.peg.268	100	hypothetical protein	bi	1	4703	fig|573.2215.peg.4703	100	hypothetical protein	bi	1	3214	fig|573.2241.peg.3214	95.83	hypothetical protein
1	284	424	fig|573.1888.peg.284	D-amino acid dehydrogenase small subunit (EC 1.4.99.1)	bi	1	1344	fig|573.2207.peg.1344	100	D-amino acid dehydrogenase small subunit (EC 1.4.99.1)	bi	1	269	fig|573.2212.peg.269	99.75	D-amino acid dehydrogenase small subunit (EC 1.4.99.1)	bi	1	4702	fig|573.2215.peg.4702	100	D-amino acid dehydrogenase small subunit (EC 1.4.99.1)	bi	1	3213	fig|573.2241.peg.3213	99.76	D-amino acid dehydrogenase small subunit (EC 1.4.99.1)
1	285	357	fig|573.1888.peg.285	Alanine racemase (EC 5.1.1.1)	bi	1	1343	fig|573.2207.peg.1343	100	Alanine racemase (EC 5.1.1.1)	bi	1	270	fig|573.2212.peg.270	100	Alanine racemase (EC 5.1.1.1)	bi	1	4701	fig|573.2215.peg.4701	100	Alanine racemase (EC 5.1.1.1)	bi	1	3212	fig|573.2241.peg.3212	99.72	Alanine racemase (EC 5.1.1.1) ## catabolic
1	286	578	fig|573.1888.peg.286	Cell volume regulation protein A	bi	1	1342	fig|573.2207.peg.1342	100	Cell volume regulation protein A	bi	1	271	fig|573.2212.peg.271	100	Cell volume regulation protein A	bi	1	4700	fig|573.2215.peg.4700	100	Cell volume regulation protein A	bi	1	3211	fig|573.2241.peg.3211	99.83	Cell volume regulation protein A
1	287	305	fig|573.1888.peg.287	Muramoyltetrapeptide carboxypeptidase (EC 3.4.17.13)	bi	1	1341	fig|573.2207.peg.1341	100	Muramoyltetrapeptide carboxypeptidase (EC 3.4.17.13)	bi	1	272	fig|573.2212.peg.272	100	Muramoyltetrapeptide carboxypeptidase (EC 3.4.17.13)	bi	1	4699	fig|573.2215.peg.4699	100	Muramoyltetrapeptide carboxypeptidase (EC 3.4.17.13)	bi	1	3210	fig|573.2241.peg.3210	100	Muramoyltetrapeptide carboxypeptidase (EC 3.4.17.13)
1	288	168	fig|573.1888.peg.288	Membrane-bound lytic murein transglycosylase E (EC 3.2.1.-)	bi	1	1340	fig|573.2207.peg.1340	100	Membrane-bound lytic murein transglycosylase E (EC 3.2.1.-)	bi	1	273	fig|573.2212.peg.273	100	Membrane-bound lytic murein transglycosylase E (EC 3.2.1.-)	bi	1	4698	fig|573.2215.peg.4698	100	Membrane-bound lytic murein transglycosylase E (EC 3.2.1.-)	bi	1	3209	fig|573.2241.peg.3209	100	Membrane-bound lytic murein transglycosylase E (EC 3.2.1.-)
1	289	707	fig|573.1888.peg.289	Ferrichrome-iron receptor	bi	1	1339	fig|573.2207.peg.1339	100	Ferrichrome-iron receptor	bi	1	274	fig|573.2212.peg.274	100	Ferrichrome-iron receptor	bi	1	4697	fig|573.2215.peg.4697	100	Ferrichrome-iron receptor	bi	1	3208	fig|573.2241.peg.3208	99.58	Ferrichrome-iron receptor
1	290	582	fig|573.1888.peg.290	Trehalase (EC 3.2.1.28); Periplasmic trehalase precursor (EC 3.2.1.28)	bi	1	1338	fig|573.2207.peg.1338	100	Trehalase (EC 3.2.1.28); Periplasmic trehalase precursor (EC 3.2.1.28)	bi	1	275	fig|573.2212.peg.275	100	Trehalase (EC 3.2.1.28); Periplasmic trehalase precursor (EC 3.2.1.28)	bi	1	4696	fig|573.2215.peg.4696	99.83	Trehalase (EC 3.2.1.28); Periplasmic trehalase precursor (EC 3.2.1.28)	bi	1	3207	fig|573.2241.peg.3207	99.48	Trehalase (EC 3.2.1.28); Periplasmic trehalase precursor (EC 3.2.1.28)
1	291	480	fig|573.1888.peg.291	Protein containing domains DUF404, DUF407	bi	1	1337	fig|573.2207.peg.1337	100	Protein containing domains DUF404, DUF407	bi	1	276	fig|573.2212.peg.276	99.79	Protein containing domains DUF404, DUF407	bi	1	4695	fig|573.2215.peg.4695	99.79	Protein containing domains DUF404, DUF407	bi	1	3205	fig|573.2241.peg.3205	99.79	Protein containing domains DUF404, DUF407
1	292	310	fig|573.1888.peg.292	Protein containing domains DUF403	bi	1	1336	fig|573.2207.peg.1336	100	Protein containing domains DUF403	bi	1	277	fig|573.2212.peg.277	100	Protein containing domains DUF403	bi	1	4694	fig|573.2215.peg.4694	100	Protein containing domains DUF403	bi	1	3204	fig|573.2241.peg.3204	100	Protein containing domains DUF403
1	293	272	fig|573.1888.peg.293	Protein containing transglutaminase-like domain, putative cysteine protease	bi	1	1335	fig|573.2207.peg.1335	100	Protein containing transglutaminase-like domain, putative cysteine protease	bi	1	278	fig|573.2212.peg.278	100	Protein containing transglutaminase-like domain, putative cysteine protease	bi	1	4693	fig|573.2215.peg.4693	100	Protein containing transglutaminase-like domain, putative cysteine protease	bi	1	3203	fig|573.2241.peg.3203	100	Protein containing transglutaminase-like domain, putative cysteine protease
1	294	249	fig|573.1888.peg.294	FIG00731993: hypothetical protein	bi	1	1334	fig|573.2207.peg.1334	100	FIG00731993: hypothetical protein	bi	1	279	fig|573.2212.peg.279	100	FIG00731993: hypothetical protein	bi	1	4692	fig|573.2215.peg.4692	100	FIG00731993: hypothetical protein	bi	1	3202	fig|573.2241.peg.3202	99.6	FIG00731993: hypothetical protein
1	295	98	fig|573.1888.peg.295	hypothetical protein	bi	1	1333	fig|573.2207.peg.1333	100	hypothetical protein	bi	1	280	fig|573.2212.peg.280	98.97	hypothetical protein	bi	1	4691	fig|573.2215.peg.4691	98.97	hypothetical protein	-				0
1	296	329	fig|573.1888.peg.296	Fatty acid desaturase	bi	1	1332	fig|573.2207.peg.1332	100	Fatty acid desaturase	bi	1	281	fig|573.2212.peg.281	100	Fatty acid desaturase	bi	1	4690	fig|573.2215.peg.4690	100	Fatty acid desaturase	bi	1	3200	fig|573.2241.peg.3200	98.48	Fatty acid desaturase
1	297	267	fig|573.1888.peg.297	ABC-type phosphate/phosphonate transport system, periplasmic component	bi	1	1331	fig|573.2207.peg.1331	100	ABC-type phosphate/phosphonate transport system, periplasmic component	bi	1	282	fig|573.2212.peg.282	100	ABC-type phosphate/phosphonate transport system, periplasmic component	bi	1	4689	fig|573.2215.peg.4689	100	ABC-type phosphate/phosphonate transport system, periplasmic component	bi	1	3199	fig|573.2241.peg.3199	98.87	ABC-type phosphate/phosphonate transport system, periplasmic component
1	298	41	fig|573.1888.peg.298	Nitrilotriacetate monooxygenase component A (EC 1.14.13.-)	bi	1	1330	fig|573.2207.peg.1330	100	Nitrilotriacetate monooxygenase component A (EC 1.14.13.-)	bi	1	283	fig|573.2212.peg.283	100	Nitrilotriacetate monooxygenase component A (EC 1.14.13.-)	bi	1	4688	fig|573.2215.peg.4688	100	Nitrilotriacetate monooxygenase component A (EC 1.14.13.-)	bi	1	3198	fig|573.2241.peg.3198	100	Nitrilotriacetate monooxygenase component A (EC 1.14.13.-)
1	299	48	fig|573.1888.peg.299	hypothetical protein	bi	1	1329	fig|573.2207.peg.1329	100	hypothetical protein	bi	1	284	fig|573.2212.peg.284	100	hypothetical protein	bi	1	4687	fig|573.2215.peg.4687	100	hypothetical protein	bi	1	3197	fig|573.2241.peg.3197	97.87	hypothetical protein
1	300	315	fig|573.1888.peg.300	Threonine catabolic operon transcriptional activator TdcA	bi	1	1328	fig|573.2207.peg.1328	100	Threonine catabolic operon transcriptional activator TdcA	bi	1	285	fig|573.2212.peg.285	100	Threonine catabolic operon transcriptional activator TdcA	bi	1	4686	fig|573.2215.peg.4686	99.68	Threonine catabolic operon transcriptional activator TdcA	bi	1	3196	fig|573.2241.peg.3196	100	Threonine catabolic operon transcriptional activator TdcA
1	301	330	fig|573.1888.peg.301	Threonine dehydratase, catabolic (EC 4.3.1.19)	bi	1	1327	fig|573.2207.peg.1327	100	Threonine dehydratase, catabolic (EC 4.3.1.19)	bi	1	286	fig|573.2212.peg.286	100	Threonine dehydratase, catabolic (EC 4.3.1.19)	bi	1	4685	fig|573.2215.peg.4685	100	Threonine dehydratase, catabolic (EC 4.3.1.19)	bi	1	3195	fig|573.2241.peg.3195	99.39	Threonine dehydratase, catabolic (EC 4.3.1.19)
1	302	444	fig|573.1888.peg.302	L-threonine transporter, anaerobically inducible	bi	1	1326	fig|573.2207.peg.1326	100	L-threonine transporter, anaerobically inducible	bi	1	287	fig|573.2212.peg.287	100	L-threonine transporter, anaerobically inducible	bi	1	4684	fig|573.2215.peg.4684	100	L-threonine transporter, anaerobically inducible	bi	1	3194	fig|573.2241.peg.3194	99.77	L-threonine transporter, anaerobically inducible
1	303	403	fig|573.1888.peg.303	Acetate kinase (EC 2.7.2.1)	bi	1	1325	fig|573.2207.peg.1325	100	Acetate kinase (EC 2.7.2.1)	bi	1	288	fig|573.2212.peg.288	100	Acetate kinase (EC 2.7.2.1)	bi	1	4683	fig|573.2215.peg.4683	100	Acetate kinase (EC 2.7.2.1)	bi	1	3193	fig|573.2241.peg.3193	99.75	Acetate kinase (EC 2.7.2.1)
1	304	765	fig|573.1888.peg.304	Pyruvate formate-lyase (EC 2.3.1.54)	bi	1	1324	fig|573.2207.peg.1324	100	Pyruvate formate-lyase (EC 2.3.1.54)	bi	1	289	fig|573.2212.peg.289	100	Pyruvate formate-lyase (EC 2.3.1.54)	bi	1	4682	fig|573.2215.peg.4682	100	Pyruvate formate-lyase (EC 2.3.1.54)	bi	1	3192	fig|573.2241.peg.3192	99.35	Pyruvate formate-lyase (EC 2.3.1.54)
1	305	353	fig|573.1888.peg.305	Branched-chain amino acid ABC transporter, amino acid-binding protein (TC 3.A.1.4.1)	bi	1	1323	fig|573.2207.peg.1323	100	Branched-chain amino acid ABC transporter, amino acid-binding protein (TC 3.A.1.4.1)	bi	1	290	fig|573.2212.peg.290	100	Branched-chain amino acid ABC transporter, amino acid-binding protein (TC 3.A.1.4.1)	bi	1	4681	fig|573.2215.peg.4681	100	Branched-chain amino acid ABC transporter, amino acid-binding protein (TC 3.A.1.4.1)	bi	1	3191	fig|573.2241.peg.3191	99.72	Branched-chain amino acid ABC transporter, amino acid-binding protein (TC 3.A.1.4.1)
1	306	305	fig|573.1888.peg.306	High-affinity branched-chain amino acid transport system permease protein LivH (TC 3.A.1.4.1)	bi	1	1322	fig|573.2207.peg.1322	100	High-affinity branched-chain amino acid transport system permease protein LivH (TC 3.A.1.4.1)	bi	1	291	fig|573.2212.peg.291	100	High-affinity branched-chain amino acid transport system permease protein LivH (TC 3.A.1.4.1)	bi	1	4680	fig|573.2215.peg.4680	100	High-affinity branched-chain amino acid transport system permease protein LivH (TC 3.A.1.4.1)	bi	1	3190	fig|573.2241.peg.3190	100	High-affinity branched-chain amino acid transport system permease protein LivH (TC 3.A.1.4.1)
1	307	429	fig|573.1888.peg.307	Branched-chain amino acid transport system permease protein LivM (TC 3.A.1.4.1)	bi	1	1321	fig|573.2207.peg.1321	100	Branched-chain amino acid transport system permease protein LivM (TC 3.A.1.4.1)	bi	1	292	fig|573.2212.peg.292	100	Branched-chain amino acid transport system permease protein LivM (TC 3.A.1.4.1)	bi	1	4679	fig|573.2215.peg.4679	100	Branched-chain amino acid transport system permease protein LivM (TC 3.A.1.4.1)	bi	1	3189	fig|573.2241.peg.3189	99.77	Branched-chain amino acid transport system permease protein LivM (TC 3.A.1.4.1)
1	308	292	fig|573.1888.peg.308	Branched-chain amino acid transport ATP-binding protein LivG (TC 3.A.1.4.1)	bi	1	1320	fig|573.2207.peg.1320	100	Branched-chain amino acid transport ATP-binding protein LivG (TC 3.A.1.4.1)	bi	1	293	fig|573.2212.peg.293	100	Branched-chain amino acid transport ATP-binding protein LivG (TC 3.A.1.4.1)	bi	1	4678	fig|573.2215.peg.4678	100	Branched-chain amino acid transport ATP-binding protein LivG (TC 3.A.1.4.1)	bi	1	3188	fig|573.2241.peg.3188	99.66	Branched-chain amino acid transport ATP-binding protein LivG (TC 3.A.1.4.1)
1	309	240	fig|573.1888.peg.309	Branched-chain amino acid transport ATP-binding protein LivF (TC 3.A.1.4.1)	bi	1	1319	fig|573.2207.peg.1319	100	Branched-chain amino acid transport ATP-binding protein LivF (TC 3.A.1.4.1)	bi	1	294	fig|573.2212.peg.294	100	Branched-chain amino acid transport ATP-binding protein LivF (TC 3.A.1.4.1)	bi	1	4677	fig|573.2215.peg.4677	100	Branched-chain amino acid transport ATP-binding protein LivF (TC 3.A.1.4.1)	bi	1	3187	fig|573.2241.peg.3187	99.58	Branched-chain amino acid transport ATP-binding protein LivF (TC 3.A.1.4.1)
1	310	298	fig|573.1888.peg.310	Transcriptional regulator	bi	1	1318	fig|573.2207.peg.1318	100	Transcriptional regulator	bi	1	295	fig|573.2212.peg.295	99.66	Transcriptional regulator	bi	1	4676	fig|573.2215.peg.4676	100	Transcriptional regulator	bi	1	3186	fig|573.2241.peg.3186	100	Transcriptional regulator
1	311	548	fig|573.1888.peg.311	Phosphoenolpyruvate carboxykinase [ATP] (EC 4.1.1.49)	bi	1	1317	fig|573.2207.peg.1317	100	Phosphoenolpyruvate carboxykinase [ATP] (EC 4.1.1.49)	bi	1	296	fig|573.2212.peg.296	100	Phosphoenolpyruvate carboxykinase [ATP] (EC 4.1.1.49)	bi	1	4675	fig|573.2215.peg.4675	100	Phosphoenolpyruvate carboxykinase [ATP] (EC 4.1.1.49)	bi	1	3185	fig|573.2241.peg.3185	100	Phosphoenolpyruvate carboxykinase [ATP] (EC 4.1.1.49)
1	312	159	fig|573.1888.peg.312	GCN5-related N-acetyltransferase (EC 2.3.1.57)	bi	1	1316	fig|573.2207.peg.1316	100	GCN5-related N-acetyltransferase (EC 2.3.1.57)	bi	1	297	fig|573.2212.peg.297	100	GCN5-related N-acetyltransferase (EC 2.3.1.57)	bi	1	4674	fig|573.2215.peg.4674	100	GCN5-related N-acetyltransferase (EC 2.3.1.57)	bi	1	3184	fig|573.2241.peg.3184	99.37	GCN5-related N-acetyltransferase (EC 2.3.1.57)
1	313	309	fig|573.1888.peg.313	FIG000557: hypothetical protein co-occurring with RecR	bi	1	1315	fig|573.2207.peg.1315	100	FIG000557: hypothetical protein co-occurring with RecR	bi	1	298	fig|573.2212.peg.298	100	FIG000557: hypothetical protein co-occurring with RecR	bi	1	4673	fig|573.2215.peg.4673	100	FIG000557: hypothetical protein co-occurring with RecR	bi	1	3183	fig|573.2241.peg.3183	100	FIG000557: hypothetical protein co-occurring with RecR
1	314	464	fig|573.1888.peg.314	metabolite/H symporter, major facilitator superfamily (MFS)	bi	1	1314	fig|573.2207.peg.1314	100	metabolite/H symporter, major facilitator superfamily (MFS)	bi	1	299	fig|573.2212.peg.299	100	metabolite/H symporter, major facilitator superfamily (MFS)	bi	1	4672	fig|573.2215.peg.4672	100	metabolite/H symporter, major facilitator superfamily (MFS)	bi	1	3182	fig|573.2241.peg.3182	99.78	metabolite/H symporter, major facilitator superfamily (MFS)
1	315	270	fig|573.1888.peg.315	Hypothetical ABC transport system, periplasmic component	bi	1	1313	fig|573.2207.peg.1313	100	Hypothetical ABC transport system, periplasmic component	bi	1	300	fig|573.2212.peg.300	100	Hypothetical ABC transport system, periplasmic component	bi	1	4671	fig|573.2215.peg.4671	100	Hypothetical ABC transport system, periplasmic component	bi	1	3181	fig|573.2241.peg.3181	100	Hypothetical ABC transport system, periplasmic component
1	316	300	fig|573.1888.peg.316	LysR family transcriptional regulator YbhD	bi	1	1312	fig|573.2207.peg.1312	100	LysR family transcriptional regulator YbhD	bi	1	301	fig|573.2212.peg.301	100	LysR family transcriptional regulator YbhD	bi	1	4670	fig|573.2215.peg.4670	100	LysR family transcriptional regulator YbhD	bi	1	3180	fig|573.2241.peg.3180	100	LysR family transcriptional regulator YbhD
1	317	161	fig|573.1888.peg.317	Putative cold-shock protein	bi	1	1311	fig|573.2207.peg.1311	100	Putative cold-shock protein	bi	1	302	fig|573.2212.peg.302	100	Putative cold-shock protein	bi	1	4669	fig|573.2215.peg.4669	98.8	Putative cold-shock protein	bi	1	3179	fig|573.2241.peg.3179	100	Putative cold-shock protein
1	318	264	fig|573.1888.peg.318	Ribosomal large subunit pseudouridine synthase A (EC 4.2.1.70)	bi	1	1310	fig|573.2207.peg.1310	100	Ribosomal large subunit pseudouridine synthase A (EC 4.2.1.70)	bi	1	303	fig|573.2212.peg.303	100	Ribosomal large subunit pseudouridine synthase A (EC 4.2.1.70)	bi	1	4662	fig|573.2215.peg.4662	98.71	Ribosomal large subunit pseudouridine synthase A (EC 4.2.1.70)	bi	1	3178	fig|573.2241.peg.3178	98.71	Ribosomal large subunit pseudouridine synthase A (EC 4.2.1.70)
1	319	180	fig|573.1888.peg.319	Nucleoprotein/polynucleotide-associated enzyme	bi	1	1309	fig|573.2207.peg.1309	99.44	Nucleoprotein/polynucleotide-associated enzyme	bi	1	304	fig|573.2212.peg.304	99.44	Nucleoprotein/polynucleotide-associated enzyme	bi	1	4661	fig|573.2215.peg.4661	99.44	Nucleoprotein/polynucleotide-associated enzyme	bi	1	3177	fig|573.2241.peg.3177	99.44	Nucleoprotein/polynucleotide-associated enzyme
1	320	110	fig|573.1888.peg.320	FIG00732272: hypothetical protein	bi	1	1308	fig|573.2207.peg.1308	100	FIG00732272: hypothetical protein	bi	1	305	fig|573.2212.peg.305	100	FIG00732272: hypothetical protein	bi	1	4660	fig|573.2215.peg.4660	100	FIG00732272: hypothetical protein	bi	1	3176	fig|573.2241.peg.3176	100	FIG00732272: hypothetical protein
1	321	54	fig|573.1888.peg.321	hypothetical protein	bi	1	1307	fig|573.2207.peg.1307	100	hypothetical protein	bi	1	306	fig|573.2212.peg.306	100	hypothetical protein	bi	1	4659	fig|573.2215.peg.4659	98.11	hypothetical protein	bi	1	3175	fig|573.2241.peg.3175	100	hypothetical protein
1	322	337	fig|573.1888.peg.322	Uncharacterized protein ImpJ/VasE	bi	1	1306	fig|573.2207.peg.1306	100	Uncharacterized protein ImpJ/VasE	bi	1	307	fig|573.2212.peg.307	99.7	Uncharacterized protein ImpJ/VasE	bi	1	4658	fig|573.2215.peg.4658	100	Uncharacterized protein ImpJ/VasE	bi	1	3174	fig|573.2241.peg.3174	99.49	Uncharacterized protein ImpJ/VasE
1	323	218	fig|573.1888.peg.323	Probable transmembrane protein	bi	1	1305	fig|573.2207.peg.1305	100	Probable transmembrane protein	bi	1	308	fig|573.2212.peg.308	99.54	Probable transmembrane protein	bi	1	4657	fig|573.2215.peg.4657	100	Probable transmembrane protein	bi	1	3173	fig|573.2241.peg.3173	99.54	Probable transmembrane protein
1	324	566	fig|573.1888.peg.324	Outer membrane protein assembly factor YaeT precursor	bi	1	1304	fig|573.2207.peg.1304	100	Outer membrane protein assembly factor YaeT precursor	bi	1	309	fig|573.2212.peg.309	100	Outer membrane protein assembly factor YaeT precursor	bi	1	4656	fig|573.2215.peg.4656	100	Outer membrane protein assembly factor YaeT precursor	bi	1	3172	fig|573.2241.peg.3172	97.52	Outer membrane protein assembly factor YaeT precursor
1	325	829	fig|573.1888.peg.325	VgrG protein	bi	1	1303	fig|573.2207.peg.1303	100	VgrG protein	bi	1	310	fig|573.2212.peg.310	100	VgrG protein	bi	1	4655	fig|573.2215.peg.4655	99.63	VgrG protein	bi	1	3170	fig|573.2241.peg.3170	95.29	VgrG protein
1	326	754	fig|573.1888.peg.326	FIG00731336: hypothetical protein	bi	1	1302	fig|573.2207.peg.1302	100	FIG00731336: hypothetical protein	bi	1	311	fig|573.2212.peg.311	100	FIG00731336: hypothetical protein	-				0		bi	1	3162	fig|573.2241.peg.3162	93.36	FIG00731336: hypothetical protein
1	327	297	fig|573.1888.peg.327	serine/threonine kinase	bi	1	1301	fig|573.2207.peg.1301	100	serine/threonine kinase	bi	1	312	fig|573.2212.peg.312	100	serine/threonine kinase	-				0		bi	1	3157	fig|573.2241.peg.3157	96.96	serine/threonine kinase
1	328	40	fig|573.1888.peg.328	FIG00731336: hypothetical protein	bi	1	1297	fig|573.2207.peg.1297	100	FIG00731336: hypothetical protein	bi	1	313	fig|573.2212.peg.313	100	FIG00731336: hypothetical protein	bi	1	4652	fig|573.2215.peg.4652	100	FIG00731336: hypothetical protein	bi	1	3160	fig|573.2241.peg.3160	97.37	FIG00731336: hypothetical protein
1	329	298	fig|573.1888.peg.329	serine/threonine kinase	bi	1	1299	fig|573.2207.peg.1299	100	serine/threonine kinase	bi	1	314	fig|573.2212.peg.314	100	serine/threonine kinase	-				0		bi	1	3158	fig|573.2241.peg.3158	96.97	serine/threonine kinase
1	330	298	fig|573.1888.peg.330	serine/threonine kinase	bi	1	1298	fig|573.2207.peg.1298	100	serine/threonine kinase	bi	1	315	fig|573.2212.peg.315	100	serine/threonine kinase	-				0		bi	1	3161	fig|573.2241.peg.3161	97.64	serine/threonine kinase
1	331	40	fig|573.1888.peg.331	FIG00731336: hypothetical protein	uni	1	1297	fig|573.2207.peg.1297	100	FIG00731336: hypothetical protein	uni	1	313	fig|573.2212.peg.313	100	FIG00731336: hypothetical protein	uni	1	4652	fig|573.2215.peg.4652	100	FIG00731336: hypothetical protein	uni	1	3160	fig|573.2241.peg.3160	97.37	FIG00731336: hypothetical protein
1	332	88	fig|573.1888.peg.332	serine/threonine kinase	bi	1	1296	fig|573.2207.peg.1296	100	serine/threonine kinase	bi	1	317	fig|573.2212.peg.317	100	serine/threonine kinase	-				0		uni	1	3161	fig|573.2241.peg.3161	96.15	serine/threonine kinase
1	333	45	fig|573.1888.peg.333	hypothetical protein	bi	1	1295	fig|573.2207.peg.1295	100	hypothetical protein	bi	1	318	fig|573.2212.peg.318	100	hypothetical protein	bi	1	4651	fig|573.2215.peg.4651	100	hypothetical protein	bi	1	3156	fig|573.2241.peg.3156	97.73	hypothetical protein
1	334	53	fig|573.1888.peg.334	hypothetical protein	bi	1	1294	fig|573.2207.peg.1294	100	hypothetical protein	bi	1	319	fig|573.2212.peg.319	100	hypothetical protein	bi	1	4650	fig|573.2215.peg.4650	100	hypothetical protein	bi	1	3155	fig|573.2241.peg.3155	100	hypothetical protein
1	335	89	fig|573.1888.peg.335	FIG00731555: hypothetical protein	bi	1	1293	fig|573.2207.peg.1293	100	FIG00731555: hypothetical protein	bi	1	320	fig|573.2212.peg.320	100	FIG00731555: hypothetical protein	bi	1	4649	fig|573.2215.peg.4649	100	FIG00731555: hypothetical protein	bi	1	3154	fig|573.2241.peg.3154	98.86	FIG00731555: hypothetical protein
1	336	386	fig|573.1888.peg.336	FIG00731376: hypothetical protein	bi	1	1292	fig|573.2207.peg.1292	100	FIG00731376: hypothetical protein	bi	1	321	fig|573.2212.peg.321	100	FIG00731376: hypothetical protein	bi	1	4648	fig|573.2215.peg.4648	100	FIG00731376: hypothetical protein	bi	1	3153	fig|573.2241.peg.3153	99.74	FIG00731376: hypothetical protein
1	337	1139	fig|573.1888.peg.337	probable membrane protein YPO1482	bi	1	1291	fig|573.2207.peg.1291	100	probable membrane protein YPO1482	bi	1	322	fig|573.2212.peg.322	99.91	probable membrane protein YPO1482	bi	1	4646	fig|573.2215.peg.4646	98.06	probable membrane protein YPO1482	bi	1	3152	fig|573.2241.peg.3152	97.17	probable membrane protein YPO1482
1	338	588	fig|573.1888.peg.338	Protein ImpG/VasA	bi	1	1289	fig|573.2207.peg.1289	100	Protein ImpG/VasA	bi	1	323	fig|573.2212.peg.323	99.83	Protein ImpG/VasA	bi	1	4645	fig|573.2215.peg.4645	98.81	Protein ImpG/VasA	bi	1	3151	fig|573.2241.peg.3151	98.64	Protein ImpG/VasA
1	339	364	fig|573.1888.peg.339	Uncharacterized protein ImpH/VasB	bi	1	1288	fig|573.2207.peg.1288	100	Uncharacterized protein ImpH/VasB	bi	1	324	fig|573.2212.peg.324	100	Uncharacterized protein ImpH/VasB	bi	1	4644	fig|573.2215.peg.4644	99.11	Uncharacterized protein ImpH/VasB	bi	1	3150	fig|573.2241.peg.3150	99.45	Uncharacterized protein ImpH/VasB
1	340	163	fig|573.1888.peg.340	FIG00732196: hypothetical protein	bi	1	1287	fig|573.2207.peg.1287	100	FIG00732196: hypothetical protein	bi	1	325	fig|573.2212.peg.325	100	FIG00732196: hypothetical protein	bi	1	4643	fig|573.2215.peg.4643	98.77	FIG00732196: hypothetical protein	bi	1	3149	fig|573.2241.peg.3149	99.38	FIG00732196: hypothetical protein
1	341	148	fig|573.1888.peg.341	Uncharacterized protein similar to VCA0109	bi	1	1286	fig|573.2207.peg.1286	100	Uncharacterized protein similar to VCA0109	bi	1	326	fig|573.2212.peg.326	100	Uncharacterized protein similar to VCA0109	bi	1	4642	fig|573.2215.peg.4642	100	Uncharacterized protein similar to VCA0109	bi	1	3148	fig|573.2241.peg.3148	100	Uncharacterized protein similar to VCA0109
1	342	472	fig|573.1888.peg.342	FIG00732447: hypothetical protein	bi	1	1285	fig|573.2207.peg.1285	100	FIG00732447: hypothetical protein	bi	1	327	fig|573.2212.peg.327	100	FIG00732447: hypothetical protein	bi	1	4641	fig|573.2215.peg.4641	99.58	FIG00732447: hypothetical protein	bi	1	3147	fig|573.2241.peg.3147	99.58	FIG00732447: hypothetical protein
1	343	305	fig|573.1888.peg.343	Ribose ABC transport system, periplasmic ribose-binding protein RbsB (TC 3.A.1.2.1)	bi	1	1284	fig|573.2207.peg.1284	100	Ribose ABC transport system, periplasmic ribose-binding protein RbsB (TC 3.A.1.2.1)	bi	1	328	fig|573.2212.peg.328	100	Ribose ABC transport system, periplasmic ribose-binding protein RbsB (TC 3.A.1.2.1)	bi	1	4640	fig|573.2215.peg.4640	100	Ribose ABC transport system, periplasmic ribose-binding protein RbsB (TC 3.A.1.2.1)	bi	1	3146	fig|573.2241.peg.3146	100	Ribose ABC transport system, periplasmic ribose-binding protein RbsB (TC 3.A.1.2.1)
1	344	110	fig|573.1888.peg.344	FIG00732835: hypothetical protein	bi	1	1283	fig|573.2207.peg.1283	100	FIG00732835: hypothetical protein	bi	1	329	fig|573.2212.peg.329	100	FIG00732835: hypothetical protein	bi	1	4639	fig|573.2215.peg.4639	99.08	FIG00732835: hypothetical protein	bi	1	3145	fig|573.2241.peg.3145	97.25	FIG00732835: hypothetical protein
1	345	364	fig|573.1888.peg.345	GTP-binding and nucleic acid-binding protein YchF	bi	1	1282	fig|573.2207.peg.1282	100	GTP-binding and nucleic acid-binding protein YchF	bi	1	330	fig|573.2212.peg.330	100	GTP-binding and nucleic acid-binding protein YchF	bi	1	4638	fig|573.2215.peg.4638	100	GTP-binding and nucleic acid-binding protein YchF	bi	1	3144	fig|573.2241.peg.3144	99.72	GTP-binding and nucleic acid-binding protein YchF
1	346	195	fig|573.1888.peg.346	Peptidyl-tRNA hydrolase (EC 3.1.1.29)	bi	1	1281	fig|573.2207.peg.1281	100	Peptidyl-tRNA hydrolase (EC 3.1.1.29)	bi	1	331	fig|573.2212.peg.331	100	Peptidyl-tRNA hydrolase (EC 3.1.1.29)	bi	1	4637	fig|573.2215.peg.4637	100	Peptidyl-tRNA hydrolase (EC 3.1.1.29)	bi	1	3143	fig|573.2241.peg.3143	99.48	Peptidyl-tRNA hydrolase (EC 3.1.1.29)
1	347	92	fig|573.1888.peg.347	FIG00554739: membrane protein YchH	bi	1	1280	fig|573.2207.peg.1280	100	FIG00554739: membrane protein YchH	bi	1	332	fig|573.2212.peg.332	100	FIG00554739: membrane protein YchH	bi	1	4636	fig|573.2215.peg.4636	100	FIG00554739: membrane protein YchH	bi	1	3142	fig|573.2241.peg.3142	100	FIG00554739: membrane protein YchH
1	348	349	fig|573.1888.peg.348	Albicidin resistance protein	bi	1	1279	fig|573.2207.peg.1279	100	Albicidin resistance protein	bi	1	333	fig|573.2212.peg.333	99.71	Albicidin resistance protein	bi	1	4635	fig|573.2215.peg.4635	100	Albicidin resistance protein	bi	1	3141	fig|573.2241.peg.3141	100	Albicidin resistance protein
1	349	560	fig|573.1888.peg.349	Putative sulfate permease	bi	1	1278	fig|573.2207.peg.1278	100	Putative sulfate permease	bi	1	334	fig|573.2212.peg.334	100	Putative sulfate permease	bi	1	4634	fig|573.2215.peg.4634	100	Putative sulfate permease	bi	1	3140	fig|573.2241.peg.3140	99.82	Putative sulfate permease
1	350	316	fig|573.1888.peg.350	Ribose-phosphate pyrophosphokinase (EC 2.7.6.1)	bi	1	1277	fig|573.2207.peg.1277	100	Ribose-phosphate pyrophosphokinase (EC 2.7.6.1)	bi	1	335	fig|573.2212.peg.335	100	Ribose-phosphate pyrophosphokinase (EC 2.7.6.1)	bi	1	4633	fig|573.2215.peg.4633	100	Ribose-phosphate pyrophosphokinase (EC 2.7.6.1)	bi	1	3139	fig|573.2241.peg.3139	100	Ribose-phosphate pyrophosphokinase (EC 2.7.6.1)
1	351	283	fig|573.1888.peg.351	4-diphosphocytidyl-2-C-methyl-D-erythritol kinase (EC 2.7.1.148)	bi	1	1276	fig|573.2207.peg.1276	100	4-diphosphocytidyl-2-C-methyl-D-erythritol kinase (EC 2.7.1.148)	bi	1	336	fig|573.2212.peg.336	100	4-diphosphocytidyl-2-C-methyl-D-erythritol kinase (EC 2.7.1.148)	bi	1	4632	fig|573.2215.peg.4632	100	4-diphosphocytidyl-2-C-methyl-D-erythritol kinase (EC 2.7.1.148)	bi	1	3138	fig|573.2241.peg.3138	100	4-diphosphocytidyl-2-C-methyl-D-erythritol kinase (EC 2.7.1.148)
1	352	204	fig|573.1888.peg.352	Outer membrane lipoprotein LolB precursor	bi	1	1275	fig|573.2207.peg.1275	100	Outer membrane lipoprotein LolB precursor	bi	1	337	fig|573.2212.peg.337	100	Outer membrane lipoprotein LolB precursor	bi	1	4631	fig|573.2215.peg.4631	100	Outer membrane lipoprotein LolB precursor	bi	1	3137	fig|573.2241.peg.3137	100	Outer membrane lipoprotein LolB precursor
1	353	419	fig|573.1888.peg.353	Glutamyl-tRNA reductase (EC 1.2.1.70)	bi	1	1274	fig|573.2207.peg.1274	100	Glutamyl-tRNA reductase (EC 1.2.1.70)	bi	1	338	fig|573.2212.peg.338	100	Glutamyl-tRNA reductase (EC 1.2.1.70)	bi	1	4630	fig|573.2215.peg.4630	100	Glutamyl-tRNA reductase (EC 1.2.1.70)	bi	1	3136	fig|573.2241.peg.3136	100	Glutamyl-tRNA reductase (EC 1.2.1.70)
1	354	361	fig|573.1888.peg.354	Peptide chain release factor 1	bi	1	1273	fig|573.2207.peg.1273	100	Peptide chain release factor 1	bi	1	339	fig|573.2212.peg.339	100	Peptide chain release factor 1	bi	1	4629	fig|573.2215.peg.4629	100	Peptide chain release factor 1	bi	1	3135	fig|573.2241.peg.3135	100	Peptide chain release factor 1
1	355	283	fig|573.1888.peg.355	Protein-N(5)-glutamine methyltransferase PrmC, methylates polypeptide chain release factors RF1 and RF2	bi	1	1272	fig|573.2207.peg.1272	100	Protein-N(5)-glutamine methyltransferase PrmC, methylates polypeptide chain release factors RF1 and RF2	bi	1	340	fig|573.2212.peg.340	100	Protein-N(5)-glutamine methyltransferase PrmC, methylates polypeptide chain release factors RF1 and RF2	bi	1	4628	fig|573.2215.peg.4628	100	Protein-N(5)-glutamine methyltransferase PrmC, methylates polypeptide chain release factors RF1 and RF2	bi	1	3134	fig|573.2241.peg.3134	100	Protein-N(5)-glutamine methyltransferase PrmC, methylates polypeptide chain release factors RF1 and RF2
1	356	117	fig|573.1888.peg.356	FIG002082: Protein SirB2	bi	1	1271	fig|573.2207.peg.1271	100	FIG002082: Protein SirB2	bi	1	341	fig|573.2212.peg.341	100	FIG002082: Protein SirB2	bi	1	4627	fig|573.2215.peg.4627	100	FIG002082: Protein SirB2	bi	1	3133	fig|573.2241.peg.3133	99.09	FIG002082: Protein SirB2
1	357	271	fig|573.1888.peg.357	FIG002708: Protein SirB1	bi	1	1270	fig|573.2207.peg.1270	100	FIG002708: Protein SirB1	bi	1	342	fig|573.2212.peg.342	100	FIG002708: Protein SirB1	bi	1	4626	fig|573.2215.peg.4626	100	FIG002708: Protein SirB1	bi	1	3132	fig|573.2241.peg.3132	100	FIG002708: Protein SirB1
1	358	285	fig|573.1888.peg.358	2-Keto-3-deoxy-D-manno-octulosonate-8-phosphate synthase (EC 2.5.1.55)	bi	1	1269	fig|573.2207.peg.1269	100	2-Keto-3-deoxy-D-manno-octulosonate-8-phosphate synthase (EC 2.5.1.55)	bi	1	343	fig|573.2212.peg.343	100	2-Keto-3-deoxy-D-manno-octulosonate-8-phosphate synthase (EC 2.5.1.55)	bi	1	4625	fig|573.2215.peg.4625	100	2-Keto-3-deoxy-D-manno-octulosonate-8-phosphate synthase (EC 2.5.1.55)	bi	1	3131	fig|573.2241.peg.3131	100	2-Keto-3-deoxy-D-manno-octulosonate-8-phosphate synthase (EC 2.5.1.55)
1	359	367	fig|573.1888.peg.359	Calcium/proton antiporter	bi	1	1268	fig|573.2207.peg.1268	100	Calcium/proton antiporter	bi	1	344	fig|573.2212.peg.344	100	Calcium/proton antiporter	bi	1	4624	fig|573.2215.peg.4624	100	Calcium/proton antiporter	bi	1	3130	fig|573.2241.peg.3130	100	Calcium/proton antiporter
1	360	77	fig|573.1888.peg.360	Cation transport regulator chaB	bi	1	1267	fig|573.2207.peg.1267	100	Cation transport regulator chaB	bi	1	345	fig|573.2212.peg.345	100	Cation transport regulator chaB	bi	1	4623	fig|573.2215.peg.4623	100	Cation transport regulator chaB	bi	1	3129	fig|573.2241.peg.3129	100	Cation transport regulator chaB
1	361	227	fig|573.1888.peg.361	Cation transport protein chaC	bi	1	1266	fig|573.2207.peg.1266	100	Cation transport protein chaC	bi	1	346	fig|573.2212.peg.346	100	Cation transport protein chaC	bi	1	4622	fig|573.2215.peg.4622	100	Cation transport protein chaC	bi	1	3128	fig|573.2241.peg.3128	100	Cation transport protein chaC
1	362	40	fig|573.1888.peg.362	hypothetical protein	bi	1	1265	fig|573.2207.peg.1265	100	hypothetical protein	bi	1	347	fig|573.2212.peg.347	100	hypothetical protein	bi	1	4621	fig|573.2215.peg.4621	100	hypothetical protein	-				0
1	363	81	fig|573.1888.peg.363	FIG00510384: hypothetical protein	bi	1	1264	fig|573.2207.peg.1264	100	FIG00510384: hypothetical protein	bi	1	348	fig|573.2212.peg.348	100	FIG00510384: hypothetical protein	bi	1	4620	fig|573.2215.peg.4620	100	FIG00510384: hypothetical protein	bi	1	3127	fig|573.2241.peg.3127	100	FIG00510384: hypothetical protein
1	364	118	fig|573.1888.peg.364	Putative ACR protein	bi	1	1263	fig|573.2207.peg.1263	100	Putative ACR protein	bi	1	349	fig|573.2212.peg.349	100	Putative ACR protein	bi	1	4619	fig|573.2215.peg.4619	100	Putative ACR protein	bi	1	3126	fig|573.2241.peg.3126	100	Putative ACR protein
1	365	394	fig|573.1888.peg.365	Response regulator NasT	bi	1	1262	fig|573.2207.peg.1262	100	Response regulator NasT	bi	1	350	fig|573.2212.peg.350	100	Response regulator NasT	bi	1	4618	fig|573.2215.peg.4618	99.75	Response regulator NasT	bi	1	3125	fig|573.2241.peg.3125	99.24	Response regulator NasT
1	366	38	fig|573.1888.peg.366	hypothetical protein	-				0		bi	1	351	fig|573.2212.peg.351	100	hypothetical protein	bi	1	4617	fig|573.2215.peg.4617	100	hypothetical protein	bi	1	3124	fig|573.2241.peg.3124	97.3	hypothetical protein
1	367	419	fig|573.1888.peg.367	Nitrate ABC transporter, nitrate-binding protein	bi	1	1261	fig|573.2207.peg.1261	100	Nitrate ABC transporter, nitrate-binding protein	bi	1	352	fig|573.2212.peg.352	100	Nitrate ABC transporter, nitrate-binding protein	bi	1	4616	fig|573.2215.peg.4616	100	Nitrate ABC transporter, nitrate-binding protein	bi	1	3123	fig|573.2241.peg.3123	100	Nitrate ABC transporter, nitrate-binding protein
1	368	295	fig|573.1888.peg.368	Cyanate ABC transporter, permease protein	bi	1	1260	fig|573.2207.peg.1260	100	Cyanate ABC transporter, permease protein	bi	1	353	fig|573.2212.peg.353	100	Cyanate ABC transporter, permease protein	bi	1	4615	fig|573.2215.peg.4615	100	Cyanate ABC transporter, permease protein	bi	1	3122	fig|573.2241.peg.3122	100	Cyanate ABC transporter, permease protein
1	369	263	fig|573.1888.peg.369	Nitrate ABC transporter, ATP-binding protein	bi	1	1259	fig|573.2207.peg.1259	100	Nitrate ABC transporter, ATP-binding protein	bi	1	354	fig|573.2212.peg.354	99.62	Nitrate ABC transporter, ATP-binding protein	bi	1	4614	fig|573.2215.peg.4614	100	Nitrate ABC transporter, ATP-binding protein	bi	1	3121	fig|573.2241.peg.3121	99.62	Nitrate ABC transporter, ATP-binding protein
1	370	1356	fig|573.1888.peg.370	Nitrite reductase [NAD(P)H] large subunit (EC 1.7.1.4)	bi	1	1258	fig|573.2207.peg.1258	100	Nitrite reductase [NAD(P)H] large subunit (EC 1.7.1.4)	bi	1	355	fig|573.2212.peg.355	100	Nitrite reductase [NAD(P)H] large subunit (EC 1.7.1.4)	bi	1	4613	fig|573.2215.peg.4613	99.93	Nitrite reductase [NAD(P)H] large subunit (EC 1.7.1.4)	bi	1	3120	fig|573.2241.peg.3120	99.41	Nitrite reductase [NAD(P)H] large subunit (EC 1.7.1.4)
1	371	867	fig|573.1888.peg.371	Assimilatory nitrate reductase large subunit (EC:1.7.99.4)	bi	1	1256	fig|573.2207.peg.1256	100	Assimilatory nitrate reductase large subunit (EC:1.7.99.4)	bi	1	356	fig|573.2212.peg.356	100	Assimilatory nitrate reductase large subunit (EC:1.7.99.4)	bi	1	4612	fig|573.2215.peg.4612	100	Assimilatory nitrate reductase large subunit (EC:1.7.99.4)	bi	1	3119	fig|573.2241.peg.3119	99.77	Assimilatory nitrate reductase large subunit (EC:1.7.99.4)
1	372	455	fig|573.1888.peg.372	Invasin	bi	1	1255	fig|573.2207.peg.1255	100	Invasin	bi	1	357	fig|573.2212.peg.357	100	Invasin	bi	1	4611	fig|573.2215.peg.4611	99.78	Invasin	bi	1	3118	fig|573.2241.peg.3118	99.78	Invasin
1	373	217	fig|573.1888.peg.373	Nitrate/nitrite response regulator protein	bi	1	1254	fig|573.2207.peg.1254	100	Nitrate/nitrite response regulator protein	bi	1	358	fig|573.2212.peg.358	100	Nitrate/nitrite response regulator protein	bi	1	4610	fig|573.2215.peg.4610	100	Nitrate/nitrite response regulator protein	bi	1	3117	fig|573.2241.peg.3117	100	Nitrate/nitrite response regulator protein
1	374	593	fig|573.1888.peg.374	Nitrate/nitrite sensor protein (EC 2.7.3.-)	bi	1	1253	fig|573.2207.peg.1253	100	Nitrate/nitrite sensor protein (EC 2.7.3.-)	bi	1	359	fig|573.2212.peg.359	100	Nitrate/nitrite sensor protein (EC 2.7.3.-)	bi	1	4609	fig|573.2215.peg.4609	100	Nitrate/nitrite sensor protein (EC 2.7.3.-)	bi	1	3116	fig|573.2241.peg.3116	99.83	Nitrate/nitrite sensor protein (EC 2.7.3.-)
1	375	463	fig|573.1888.peg.375	Nitrate/nitrite transporter	bi	1	1252	fig|573.2207.peg.1252	100	Nitrate/nitrite transporter	bi	1	360	fig|573.2212.peg.360	100	Nitrate/nitrite transporter	bi	1	4608	fig|573.2215.peg.4608	100	Nitrate/nitrite transporter	bi	1	3115	fig|573.2241.peg.3115	100	Nitrate/nitrite transporter
1	376	38	fig|573.1888.peg.376	hypothetical protein	bi	1	1251	fig|573.2207.peg.1251	100	hypothetical protein	bi	1	361	fig|573.2212.peg.361	100	hypothetical protein	bi	1	4607	fig|573.2215.peg.4607	100	hypothetical protein	bi	1	3114	fig|573.2241.peg.3114	94.59	hypothetical protein
1	377	1248	fig|573.1888.peg.377	Respiratory nitrate reductase alpha chain (EC 1.7.99.4)	bi	1	1250	fig|573.2207.peg.1250	100	Respiratory nitrate reductase alpha chain (EC 1.7.99.4)	bi	1	362	fig|573.2212.peg.362	100	Respiratory nitrate reductase alpha chain (EC 1.7.99.4)	bi	1	4606	fig|573.2215.peg.4606	100	Respiratory nitrate reductase alpha chain (EC 1.7.99.4)	bi	1	3113	fig|573.2241.peg.3113	100	Respiratory nitrate reductase alpha chain (EC 1.7.99.4)
1	378	512	fig|573.1888.peg.378	Respiratory nitrate reductase beta chain (EC 1.7.99.4)	bi	1	1249	fig|573.2207.peg.1249	100	Respiratory nitrate reductase beta chain (EC 1.7.99.4)	bi	1	363	fig|573.2212.peg.363	100	Respiratory nitrate reductase beta chain (EC 1.7.99.4)	bi	1	4605	fig|573.2215.peg.4605	100	Respiratory nitrate reductase beta chain (EC 1.7.99.4)	bi	1	3112	fig|573.2241.peg.3112	100	Respiratory nitrate reductase beta chain (EC 1.7.99.4)
1	379	237	fig|573.1888.peg.379	Respiratory nitrate reductase delta chain (EC 1.7.99.4)	bi	1	1248	fig|573.2207.peg.1248	100	Respiratory nitrate reductase delta chain (EC 1.7.99.4)	bi	1	364	fig|573.2212.peg.364	99.58	Respiratory nitrate reductase delta chain (EC 1.7.99.4)	bi	1	4604	fig|573.2215.peg.4604	99.58	Respiratory nitrate reductase delta chain (EC 1.7.99.4)	bi	1	3111	fig|573.2241.peg.3111	99.58	Respiratory nitrate reductase delta chain (EC 1.7.99.4)
1	380	226	fig|573.1888.peg.380	Respiratory nitrate reductase gamma chain (EC 1.7.99.4)	bi	1	1247	fig|573.2207.peg.1247	100	Respiratory nitrate reductase gamma chain (EC 1.7.99.4)	bi	1	365	fig|573.2212.peg.365	100	Respiratory nitrate reductase gamma chain (EC 1.7.99.4)	bi	1	4603	fig|573.2215.peg.4603	100	Respiratory nitrate reductase gamma chain (EC 1.7.99.4)	bi	1	3110	fig|573.2241.peg.3110	100	Respiratory nitrate reductase gamma chain (EC 1.7.99.4)
1	381	299	fig|573.1888.peg.381	Permease of the drug/metabolite transporter (DMT) superfamily	bi	1	1246	fig|573.2207.peg.1246	100	Permease of the drug/metabolite transporter (DMT) superfamily	bi	1	366	fig|573.2212.peg.366	99.66	Permease of the drug/metabolite transporter (DMT) superfamily	bi	1	4602	fig|573.2215.peg.4602	100	Permease of the drug/metabolite transporter (DMT) superfamily	bi	1	3109	fig|573.2241.peg.3109	100	Permease of the drug/metabolite transporter (DMT) superfamily
1	382	148	fig|573.1888.peg.382	Leucine-responsive regulatory protein, regulator for leucine (or lrp) regulon and high-affinity branched-chain amino acid transport system	bi	1	1245	fig|573.2207.peg.1245	100	Leucine-responsive regulatory protein, regulator for leucine (or lrp) regulon and high-affinity branched-chain amino acid transport system	bi	1	367	fig|573.2212.peg.367	100	Leucine-responsive regulatory protein, regulator for leucine (or lrp) regulon and high-affinity branched-chain amino acid transport system	bi	1	4601	fig|573.2215.peg.4601	100	Leucine-responsive regulatory protein, regulator for leucine (or lrp) regulon and high-affinity branched-chain amino acid transport system	bi	1	3108	fig|573.2241.peg.3108	99.32	Leucine-responsive regulatory protein, regulator for leucine (or lrp) regulon and high-affinity branched-chain amino acid transport system
1	383	281	fig|573.1888.peg.383	Formyltetrahydrofolate deformylase (EC 3.5.1.10)	bi	1	1244	fig|573.2207.peg.1244	100	Formyltetrahydrofolate deformylase (EC 3.5.1.10)	bi	1	368	fig|573.2212.peg.368	100	Formyltetrahydrofolate deformylase (EC 3.5.1.10)	bi	1	4600	fig|573.2215.peg.4600	100	Formyltetrahydrofolate deformylase (EC 3.5.1.10)	bi	1	3107	fig|573.2241.peg.3107	100	Formyltetrahydrofolate deformylase (EC 3.5.1.10)
1	384	120	fig|573.1888.peg.384	UPF0225 protein YchJ	bi	1	1243	fig|573.2207.peg.1243	100	UPF0225 protein YchJ	bi	1	369	fig|573.2212.peg.369	100	UPF0225 protein YchJ	bi	1	4599	fig|573.2215.peg.4599	100	UPF0225 protein YchJ	bi	1	3106	fig|573.2241.peg.3106	100	UPF0225 protein YchJ
1	385	301	fig|573.1888.peg.385	UPF0028 protein YchK	bi	1	1242	fig|573.2207.peg.1242	100	UPF0028 protein YchK	bi	1	370	fig|573.2212.peg.370	100	UPF0028 protein YchK	bi	1	4598	fig|573.2215.peg.4598	100	UPF0028 protein YchK	bi	1	3105	fig|573.2241.peg.3105	99.67	UPF0028 protein YchK
1	386	338	fig|573.1888.peg.386	Hnr protein	bi	1	1241	fig|573.2207.peg.1241	100	Hnr protein	bi	1	371	fig|573.2212.peg.371	100	Hnr protein	bi	1	4597	fig|573.2215.peg.4597	100	Hnr protein	bi	1	3104	fig|573.2241.peg.3104	99.7	Hnr protein
1	387	301	fig|573.1888.peg.387	UTP--glucose-1-phosphate uridylyltransferase (EC 2.7.7.9)	bi	1	1240	fig|573.2207.peg.1240	100	UTP--glucose-1-phosphate uridylyltransferase (EC 2.7.7.9)	bi	1	372	fig|573.2212.peg.372	100	UTP--glucose-1-phosphate uridylyltransferase (EC 2.7.7.9)	bi	1	4596	fig|573.2215.peg.4596	100	UTP--glucose-1-phosphate uridylyltransferase (EC 2.7.7.9)	bi	1	3103	fig|573.2241.peg.3103	100	UTP--glucose-1-phosphate uridylyltransferase (EC 2.7.7.9)
1	388	109	fig|573.1888.peg.388	DNA-binding protein H-NS	bi	1	1239	fig|573.2207.peg.1239	100	DNA-binding protein H-NS	bi	1	373	fig|573.2212.peg.373	99.07	DNA-binding protein H-NS	bi	1	4595	fig|573.2215.peg.4595	99.07	DNA-binding protein H-NS	bi	1	3102	fig|573.2241.peg.3102	99.07	DNA-binding protein H-NS
1	389	176	fig|573.1888.peg.389	Thymidine kinase (EC 2.7.1.21)	bi	1	1238	fig|573.2207.peg.1238	100	Thymidine kinase (EC 2.7.1.21)	bi	1	374	fig|573.2212.peg.374	100	Thymidine kinase (EC 2.7.1.21)	bi	1	4594	fig|573.2215.peg.4594	100	Thymidine kinase (EC 2.7.1.21)	bi	1	3101	fig|573.2241.peg.3101	100	Thymidine kinase (EC 2.7.1.21)
1	390	892	fig|573.1888.peg.390	Alcohol dehydrogenase (EC 1.1.1.1); Acetaldehyde dehydrogenase (EC 1.2.1.10)	bi	1	1237	fig|573.2207.peg.1237	100	Alcohol dehydrogenase (EC 1.1.1.1); Acetaldehyde dehydrogenase (EC 1.2.1.10)	bi	1	375	fig|573.2212.peg.375	99.89	Alcohol dehydrogenase (EC 1.1.1.1); Acetaldehyde dehydrogenase (EC 1.2.1.10)	bi	1	4593	fig|573.2215.peg.4593	99.89	Alcohol dehydrogenase (EC 1.1.1.1); Acetaldehyde dehydrogenase (EC 1.2.1.10)	bi	1	3100	fig|573.2241.peg.3100	99.78	Alcohol dehydrogenase (EC 1.1.1.1); Acetaldehyde dehydrogenase (EC 1.2.1.10)
1	391	216	fig|573.1888.peg.391	Putative membrane protein	bi	1	1236	fig|573.2207.peg.1236	100	Putative membrane protein	bi	1	376	fig|573.2212.peg.376	100	Putative membrane protein	bi	1	4592	fig|573.2215.peg.4592	100	Putative membrane protein	bi	1	3099	fig|573.2241.peg.3099	100	Putative membrane protein
1	392	545	fig|573.1888.peg.392	Oligopeptide ABC transporter, periplasmic oligopeptide-binding protein OppA (TC 3.A.1.5.1)	bi	1	1235	fig|573.2207.peg.1235	100	Oligopeptide ABC transporter, periplasmic oligopeptide-binding protein OppA (TC 3.A.1.5.1)	bi	1	378	fig|573.2212.peg.378	99.82	Oligopeptide ABC transporter, periplasmic oligopeptide-binding protein OppA (TC 3.A.1.5.1)	bi	1	4591	fig|573.2215.peg.4591	99.82	Oligopeptide ABC transporter, periplasmic oligopeptide-binding protein OppA (TC 3.A.1.5.1)	bi	1	3097	fig|573.2241.peg.3097	99.82	Oligopeptide ABC transporter, periplasmic oligopeptide-binding protein OppA (TC 3.A.1.5.1)
1	393	307	fig|573.1888.peg.393	Oligopeptide transport system permease protein OppB (TC 3.A.1.5.1)	bi	1	1234	fig|573.2207.peg.1234	100	Oligopeptide transport system permease protein OppB (TC 3.A.1.5.1)	bi	1	379	fig|573.2212.peg.379	100	Oligopeptide transport system permease protein OppB (TC 3.A.1.5.1)	bi	1	4590	fig|573.2215.peg.4590	100	Oligopeptide transport system permease protein OppB (TC 3.A.1.5.1)	bi	1	3096	fig|573.2241.peg.3096	100	Oligopeptide transport system permease protein OppB (TC 3.A.1.5.1)
1	394	303	fig|573.1888.peg.394	Oligopeptide transport system permease protein OppC (TC 3.A.1.5.1)	bi	1	1233	fig|573.2207.peg.1233	100	Oligopeptide transport system permease protein OppC (TC 3.A.1.5.1)	bi	1	380	fig|573.2212.peg.380	100	Oligopeptide transport system permease protein OppC (TC 3.A.1.5.1)	bi	1	4589	fig|573.2215.peg.4589	100	Oligopeptide transport system permease protein OppC (TC 3.A.1.5.1)	bi	1	3095	fig|573.2241.peg.3095	100	Oligopeptide transport system permease protein OppC (TC 3.A.1.5.1)
1	395	338	fig|573.1888.peg.395	Oligopeptide transport ATP-binding protein OppD (TC 3.A.1.5.1)	bi	1	1232	fig|573.2207.peg.1232	100	Oligopeptide transport ATP-binding protein OppD (TC 3.A.1.5.1)	bi	1	381	fig|573.2212.peg.381	100	Oligopeptide transport ATP-binding protein OppD (TC 3.A.1.5.1)	bi	1	4588	fig|573.2215.peg.4588	100	Oligopeptide transport ATP-binding protein OppD (TC 3.A.1.5.1)	bi	1	3094	fig|573.2241.peg.3094	99.7	Oligopeptide transport ATP-binding protein OppD (TC 3.A.1.5.1)
1	396	335	fig|573.1888.peg.396	Oligopeptide transport ATP-binding protein OppF (TC 3.A.1.5.1)	bi	1	1231	fig|573.2207.peg.1231	100	Oligopeptide transport ATP-binding protein OppF (TC 3.A.1.5.1)	bi	1	382	fig|573.2212.peg.382	100	Oligopeptide transport ATP-binding protein OppF (TC 3.A.1.5.1)	bi	1	4587	fig|573.2215.peg.4587	100	Oligopeptide transport ATP-binding protein OppF (TC 3.A.1.5.1)	bi	1	3093	fig|573.2241.peg.3093	100	Oligopeptide transport ATP-binding protein OppF (TC 3.A.1.5.1)
1	397	276	fig|573.1888.peg.397	Potassium voltage-gated channel subfamily KQT; possible potassium channel, VIC family	bi	1	1230	fig|573.2207.peg.1230	100	Potassium voltage-gated channel subfamily KQT; possible potassium channel, VIC family	bi	1	383	fig|573.2212.peg.383	100	Potassium voltage-gated channel subfamily KQT; possible potassium channel, VIC family	bi	1	4586	fig|573.2215.peg.4586	100	Potassium voltage-gated channel subfamily KQT; possible potassium channel, VIC family	bi	1	3092	fig|573.2241.peg.3092	100	Potassium voltage-gated channel subfamily KQT; possible potassium channel, VIC family
1	398	110	fig|573.1888.peg.398	FIG002901: hypothetical protein co-occurring with Cardiolipin synthetase	bi	1	1229	fig|573.2207.peg.1229	100	FIG002901: hypothetical protein co-occurring with Cardiolipin synthetase	bi	1	384	fig|573.2212.peg.384	100	FIG002901: hypothetical protein co-occurring with Cardiolipin synthetase	bi	1	4585	fig|573.2215.peg.4585	100	FIG002901: hypothetical protein co-occurring with Cardiolipin synthetase	bi	1	3091	fig|573.2241.peg.3091	100	FIG002901: hypothetical protein co-occurring with Cardiolipin synthetase
1	399	487	fig|573.1888.peg.399	Cardiolipin synthetase (EC 2.7.8.-)	bi	1	1228	fig|573.2207.peg.1228	100	Cardiolipin synthetase (EC 2.7.8.-)	bi	1	385	fig|573.2212.peg.385	100	Cardiolipin synthetase (EC 2.7.8.-)	bi	1	4584	fig|573.2215.peg.4584	100	Cardiolipin synthetase (EC 2.7.8.-)	bi	1	3090	fig|573.2241.peg.3090	100	Cardiolipin synthetase (EC 2.7.8.-)
1	400	46	fig|573.1888.peg.400	FIG00644304: hypothetical protein	bi	1	1227	fig|573.2207.peg.1227	100	FIG00644304: hypothetical protein	bi	1	386	fig|573.2212.peg.386	100	FIG00644304: hypothetical protein	bi	1	4583	fig|573.2215.peg.4583	100	FIG00644304: hypothetical protein	bi	1	3089	fig|573.2241.peg.3089	100	FIG00644304: hypothetical protein
1	401	193	fig|573.1888.peg.401	hypothetical protein	bi	1	1226	fig|573.2207.peg.1226	100	hypothetical protein	bi	1	387	fig|573.2212.peg.387	100	hypothetical protein	bi	1	4582	fig|573.2215.peg.4582	100	hypothetical protein	bi	1	3087	fig|573.2241.peg.3087	100	hypothetical protein
1	402	99	fig|573.1888.peg.402	YciL protein	bi	1	1225	fig|573.2207.peg.1225	100	YciL protein	bi	1	388	fig|573.2212.peg.388	100	YciL protein	bi	1	4580	fig|573.2215.peg.4580	100	YciL protein	bi	1	3086	fig|573.2241.peg.3086	100	YciL protein
1	403	246	fig|573.1888.peg.403	Ferric siderophore transport system, periplasmic binding protein TonB	bi	1	1224	fig|573.2207.peg.1224	100	Ferric siderophore transport system, periplasmic binding protein TonB	bi	1	389	fig|573.2212.peg.389	100	Ferric siderophore transport system, periplasmic binding protein TonB	bi	1	4579	fig|573.2215.peg.4579	100	Ferric siderophore transport system, periplasmic binding protein TonB	bi	1	3085	fig|573.2241.peg.3085	99.18	Ferric siderophore transport system, periplasmic binding protein TonB
1	404	291	fig|573.1888.peg.404	Ribulosamine/erythrulosamine 3-kinase potentially involved in protein deglycation	bi	1	1223	fig|573.2207.peg.1223	100	Ribulosamine/erythrulosamine 3-kinase potentially involved in protein deglycation	bi	1	390	fig|573.2212.peg.390	100	Ribulosamine/erythrulosamine 3-kinase potentially involved in protein deglycation	bi	1	4578	fig|573.2215.peg.4578	100	Ribulosamine/erythrulosamine 3-kinase potentially involved in protein deglycation	bi	1	3084	fig|573.2241.peg.3084	100	Ribulosamine/erythrulosamine 3-kinase potentially involved in protein deglycation
1	405	95	fig|573.1888.peg.405	FIG00637864: hypothetical protein	bi	1	1222	fig|573.2207.peg.1222	100	FIG00637864: hypothetical protein	bi	1	391	fig|573.2212.peg.391	100	FIG00637864: hypothetical protein	bi	1	4577	fig|573.2215.peg.4577	100	FIG00637864: hypothetical protein	bi	1	3083	fig|573.2241.peg.3083	96.81	FIG00637864: hypothetical protein
1	406	311	fig|573.1888.peg.406	6-phosphofructokinase class II (EC 2.7.1.11)	bi	1	1221	fig|573.2207.peg.1221	100	6-phosphofructokinase class II (EC 2.7.1.11)	bi	1	392	fig|573.2212.peg.392	100	6-phosphofructokinase class II (EC 2.7.1.11)	bi	1	4576	fig|573.2215.peg.4576	100	6-phosphofructokinase class II (EC 2.7.1.11)	bi	1	3082	fig|573.2241.peg.3082	100	6-phosphofructokinase class II (EC 2.7.1.11)
1	407	230	fig|573.1888.peg.407	Putative outer membrane protein	bi	1	1220	fig|573.2207.peg.1220	100	Putative outer membrane protein	bi	1	393	fig|573.2212.peg.393	100	Putative outer membrane protein	bi	1	4575	fig|573.2215.peg.4575	100	Putative outer membrane protein	bi	1	3081	fig|573.2241.peg.3081	100	Putative outer membrane protein
1	408	78	fig|573.1888.peg.408	FIG00731377: hypothetical protein	bi	1	1219	fig|573.2207.peg.1219	100	FIG00731377: hypothetical protein	bi	1	394	fig|573.2212.peg.394	100	FIG00731377: hypothetical protein	bi	1	4574	fig|573.2215.peg.4574	100	FIG00731377: hypothetical protein	bi	1	3080	fig|573.2241.peg.3080	100	FIG00731377: hypothetical protein
1	409	643	fig|573.1888.peg.409	Threonyl-tRNA synthetase (EC 6.1.1.3)	bi	1	1218	fig|573.2207.peg.1218	100	Threonyl-tRNA synthetase (EC 6.1.1.3)	bi	1	395	fig|573.2212.peg.395	100	Threonyl-tRNA synthetase (EC 6.1.1.3)	bi	1	4573	fig|573.2215.peg.4573	100	Threonyl-tRNA synthetase (EC 6.1.1.3)	bi	1	3079	fig|573.2241.peg.3079	100	Threonyl-tRNA synthetase (EC 6.1.1.3)
1	410	114	fig|573.1888.peg.410	Translation initiation factor 3	bi	1	1217	fig|573.2207.peg.1217	100	Translation initiation factor 3	bi	1	396	fig|573.2212.peg.396	100	Translation initiation factor 3	bi	1	4572	fig|573.2215.peg.4572	100	Translation initiation factor 3	bi	1	3078	fig|573.2241.peg.3078	100	Translation initiation factor 3
1	411	66	fig|573.1888.peg.411	LSU ribosomal protein L35p	bi	1	1216	fig|573.2207.peg.1216	100	LSU ribosomal protein L35p	bi	1	397	fig|573.2212.peg.397	100	LSU ribosomal protein L35p	bi	1	4571	fig|573.2215.peg.4571	100	LSU ribosomal protein L35p	bi	1	3077	fig|573.2241.peg.3077	100	LSU ribosomal protein L35p
1	412	119	fig|573.1888.peg.412	LSU ribosomal protein L20p	bi	1	1215	fig|573.2207.peg.1215	100	LSU ribosomal protein L20p	bi	1	398	fig|573.2212.peg.398	100	LSU ribosomal protein L20p	bi	1	4570	fig|573.2215.peg.4570	100	LSU ribosomal protein L20p	bi	1	3076	fig|573.2241.peg.3076	100	LSU ribosomal protein L20p
1	413	328	fig|573.1888.peg.413	Phenylalanyl-tRNA synthetase alpha chain (EC 6.1.1.20)	bi	1	1214	fig|573.2207.peg.1214	100	Phenylalanyl-tRNA synthetase alpha chain (EC 6.1.1.20)	bi	1	399	fig|573.2212.peg.399	100	Phenylalanyl-tRNA synthetase alpha chain (EC 6.1.1.20)	bi	1	4569	fig|573.2215.peg.4569	100	Phenylalanyl-tRNA synthetase alpha chain (EC 6.1.1.20)	bi	1	3075	fig|573.2241.peg.3075	100	Phenylalanyl-tRNA synthetase alpha chain (EC 6.1.1.20)
1	414	796	fig|573.1888.peg.414	Phenylalanyl-tRNA synthetase beta chain (EC 6.1.1.20)	bi	1	1213	fig|573.2207.peg.1213	100	Phenylalanyl-tRNA synthetase beta chain (EC 6.1.1.20)	bi	1	400	fig|573.2212.peg.400	100	Phenylalanyl-tRNA synthetase beta chain (EC 6.1.1.20)	bi	1	4568	fig|573.2215.peg.4568	100	Phenylalanyl-tRNA synthetase beta chain (EC 6.1.1.20)	bi	1	3074	fig|573.2241.peg.3074	99.75	Phenylalanyl-tRNA synthetase beta chain (EC 6.1.1.20)
1	415	100	fig|573.1888.peg.415	Integration host factor alpha subunit	bi	1	1212	fig|573.2207.peg.1212	100	Integration host factor alpha subunit	bi	1	401	fig|573.2212.peg.401	100	Integration host factor alpha subunit	bi	1	4567	fig|573.2215.peg.4567	100	Integration host factor alpha subunit	bi	1	3073	fig|573.2241.peg.3073	100	Integration host factor alpha subunit
1	416	118	fig|573.1888.peg.416	Translation initiation inhibitor	bi	1	1211	fig|573.2207.peg.1211	100	Translation initiation inhibitor	bi	1	402	fig|573.2212.peg.402	100	Translation initiation inhibitor	bi	1	4566	fig|573.2215.peg.4566	100	Translation initiation inhibitor	bi	1	3072	fig|573.2241.peg.3072	100	Translation initiation inhibitor
1	417	418	fig|573.1888.peg.417	D-amino acid dehydrogenase small subunit (EC 1.4.99.1)	bi	1	1210	fig|573.2207.peg.1210	100	D-amino acid dehydrogenase small subunit (EC 1.4.99.1)	bi	1	403	fig|573.2212.peg.403	100	D-amino acid dehydrogenase small subunit (EC 1.4.99.1)	bi	1	4565	fig|573.2215.peg.4565	100	D-amino acid dehydrogenase small subunit (EC 1.4.99.1)	bi	1	3071	fig|573.2241.peg.3071	99.76	D-amino acid dehydrogenase small subunit (EC 1.4.99.1)
1	418	305	fig|573.1888.peg.418	Transcriptional activator protein LysR	bi	1	1209	fig|573.2207.peg.1209	100	Transcriptional activator protein LysR	bi	1	404	fig|573.2212.peg.404	100	Transcriptional activator protein LysR	bi	1	4564	fig|573.2215.peg.4564	100	Transcriptional activator protein LysR	bi	1	3070	fig|573.2241.peg.3070	99.67	Transcriptional activator protein LysR
1	419	484	fig|573.1888.peg.419	FIG00732247: hypothetical protein	bi	1	1208	fig|573.2207.peg.1208	100	FIG00732247: hypothetical protein	bi	1	405	fig|573.2212.peg.405	99.79	FIG00732247: hypothetical protein	bi	1	4563	fig|573.2215.peg.4563	99.79	FIG00732247: hypothetical protein	bi	1	3069	fig|573.2241.peg.3069	99.58	FIG00732247: hypothetical protein
1	420	329	fig|573.1888.peg.420	Vitamin B12 ABC transporter, permease component BtuC	bi	1	1206	fig|573.2207.peg.1206	100	Vitamin B12 ABC transporter, permease component BtuC	bi	1	406	fig|573.2212.peg.406	100	Vitamin B12 ABC transporter, permease component BtuC	bi	1	4562	fig|573.2215.peg.4562	100	Vitamin B12 ABC transporter, permease component BtuC	bi	1	3068	fig|573.2241.peg.3068	99.7	Vitamin B12 ABC transporter, permease component BtuC
1	421	264	fig|573.1888.peg.421	Methionine ABC transporter substrate-binding protein	bi	1	1205	fig|573.2207.peg.1205	100	Methionine ABC transporter substrate-binding protein	bi	1	407	fig|573.2212.peg.407	99.62	Methionine ABC transporter substrate-binding protein	bi	1	4561	fig|573.2215.peg.4561	100	Methionine ABC transporter substrate-binding protein	bi	1	3067	fig|573.2241.peg.3067	99.62	Methionine ABC transporter substrate-binding protein
1	422	184	fig|573.1888.peg.422	Glutathione peroxidase family protein	bi	1	1204	fig|573.2207.peg.1204	100	Glutathione peroxidase family protein	bi	1	408	fig|573.2212.peg.408	100	Glutathione peroxidase family protein	bi	1	4560	fig|573.2215.peg.4560	100	Glutathione peroxidase family protein	bi	1	3066	fig|573.2241.peg.3066	100	Glutathione peroxidase family protein
1	423	250	fig|573.1888.peg.423	Vitamin B12 ABC transporter, ATPase component BtuD	bi	1	1203	fig|573.2207.peg.1203	100	Vitamin B12 ABC transporter, ATPase component BtuD	bi	1	409	fig|573.2212.peg.409	100	Vitamin B12 ABC transporter, ATPase component BtuD	bi	1	4559	fig|573.2215.peg.4559	100	Vitamin B12 ABC transporter, ATPase component BtuD	bi	1	3065	fig|573.2241.peg.3065	99.2	Vitamin B12 ABC transporter, ATPase component BtuD
1	424	155	fig|573.1888.peg.424	Probable lipoprotein nlpC precursor	bi	1	1202	fig|573.2207.peg.1202	100	Probable lipoprotein nlpC precursor	bi	1	410	fig|573.2212.peg.410	100	Probable lipoprotein nlpC precursor	bi	1	4558	fig|573.2215.peg.4558	100	Probable lipoprotein nlpC precursor	bi	1	3064	fig|573.2241.peg.3064	100	Probable lipoprotein nlpC precursor
1	425	481	fig|573.1888.peg.425	Selenoprotein O and cysteine-containing homologs	bi	1	1201	fig|573.2207.peg.1201	100	Selenoprotein O and cysteine-containing homologs	bi	1	411	fig|573.2212.peg.411	100	Selenoprotein O and cysteine-containing homologs	bi	1	4557	fig|573.2215.peg.4557	100	Selenoprotein O and cysteine-containing homologs	bi	1	3063	fig|573.2241.peg.3063	99.79	Selenoprotein O and cysteine-containing homologs
1	426	76	fig|573.1888.peg.426	FIG00731881: hypothetical protein	bi	1	1200	fig|573.2207.peg.1200	100	FIG00731881: hypothetical protein	bi	1	412	fig|573.2212.peg.412	100	FIG00731881: hypothetical protein	bi	1	4556	fig|573.2215.peg.4556	100	FIG00731881: hypothetical protein	bi	1	3062	fig|573.2241.peg.3062	100	FIG00731881: hypothetical protein
1	427	381	fig|573.1888.peg.427	2-keto-3-deoxy-D-arabino-heptulosonate-7-phosphate synthase I alpha (EC 2.5.1.54)	bi	1	1199	fig|573.2207.peg.1199	99.73	2-keto-3-deoxy-D-arabino-heptulosonate-7-phosphate synthase I alpha (EC 2.5.1.54)	bi	1	413	fig|573.2212.peg.413	100	2-keto-3-deoxy-D-arabino-heptulosonate-7-phosphate synthase I alpha (EC 2.5.1.54)	bi	1	4555	fig|573.2215.peg.4555	100	2-keto-3-deoxy-D-arabino-heptulosonate-7-phosphate synthase I alpha (EC 2.5.1.54)	bi	1	3061	fig|573.2241.peg.3061	99.74	2-keto-3-deoxy-D-arabino-heptulosonate-7-phosphate synthase I alpha (EC 2.5.1.54)
1	428	278	fig|573.1888.peg.428	FIG137360: hypothetical protein	bi	1	1198	fig|573.2207.peg.1198	100	FIG137360: hypothetical protein	bi	1	414	fig|573.2212.peg.414	100	FIG137360: hypothetical protein	bi	1	4554	fig|573.2215.peg.4554	100	FIG137360: hypothetical protein	bi	1	3060	fig|573.2241.peg.3060	100	FIG137360: hypothetical protein
1	429	793	fig|573.1888.peg.429	Phosphoenolpyruvate synthase (EC 2.7.9.2)	bi	1	1197	fig|573.2207.peg.1197	100	Phosphoenolpyruvate synthase (EC 2.7.9.2)	bi	1	415	fig|573.2212.peg.415	100	Phosphoenolpyruvate synthase (EC 2.7.9.2)	bi	1	4553	fig|573.2215.peg.4553	100	Phosphoenolpyruvate synthase (EC 2.7.9.2)	bi	1	3058	fig|573.2241.peg.3058	100	Phosphoenolpyruvate synthase (EC 2.7.9.2)
1	430	371	fig|573.1888.peg.430	Putative membrane protein	bi	1	1196	fig|573.2207.peg.1196	100	Putative membrane protein	bi	1	416	fig|573.2212.peg.416	99.73	Putative membrane protein	bi	1	4552	fig|573.2215.peg.4552	99.73	Putative membrane protein	bi	1	3057	fig|573.2241.peg.3057	99.73	Putative membrane protein
1	431	48	fig|573.1888.peg.431	hypothetical protein	bi	1	1195	fig|573.2207.peg.1195	100	hypothetical protein	-				0		-				0		-				0
1	432	1020	fig|573.1888.peg.432	Glycolate dehydrogenase (EC 1.1.99.14), subunit GlcD	bi	1	1194	fig|573.2207.peg.1194	100	Glycolate dehydrogenase (EC 1.1.99.14), subunit GlcD	bi	1	417	fig|573.2212.peg.417	100	Glycolate dehydrogenase (EC 1.1.99.14), subunit GlcD	bi	1	4551	fig|573.2215.peg.4551	99.9	Glycolate dehydrogenase (EC 1.1.99.14), subunit GlcD	bi	1	3056	fig|573.2241.peg.3056	99.71	Glycolate dehydrogenase (EC 1.1.99.14), subunit GlcD
1	433	137	fig|573.1888.peg.433	1,4-dihydroxy-2-naphthoyl-CoA hydrolase (EC 3.1.2.28) in menaquinone biosynthesis	bi	1	1193	fig|573.2207.peg.1193	100	1,4-dihydroxy-2-naphthoyl-CoA hydrolase (EC 3.1.2.28) in menaquinone biosynthesis	bi	1	418	fig|573.2212.peg.418	100	1,4-dihydroxy-2-naphthoyl-CoA hydrolase (EC 3.1.2.28) in menaquinone biosynthesis	bi	1	4550	fig|573.2215.peg.4550	100	1,4-dihydroxy-2-naphthoyl-CoA hydrolase (EC 3.1.2.28) in menaquinone biosynthesis	bi	1	3055	fig|573.2241.peg.3055	100	1,4-dihydroxy-2-naphthoyl-CoA hydrolase (EC 3.1.2.28) in menaquinone biosynthesis
1	434	83	fig|573.1888.peg.434	Transglycosylase associated protein	bi	1	1192	fig|573.2207.peg.1192	100	Transglycosylase associated protein	bi	1	419	fig|573.2212.peg.419	100	Transglycosylase associated protein	bi	1	4549	fig|573.2215.peg.4549	100	Transglycosylase associated protein	bi	1	3054	fig|573.2241.peg.3054	100	Transglycosylase associated protein
1	435	107	fig|573.1888.peg.435	FIG00732171: hypothetical protein	bi	1	1191	fig|573.2207.peg.1191	100	FIG00732171: hypothetical protein	bi	1	420	fig|573.2212.peg.420	100	FIG00732171: hypothetical protein	bi	1	4548	fig|573.2215.peg.4548	100	FIG00732171: hypothetical protein	bi	1	3053	fig|573.2241.peg.3053	99.06	FIG00732171: hypothetical protein
1	436	327	fig|573.1888.peg.436	FIG00919961: hypothetical protein	bi	1	1190	fig|573.2207.peg.1190	100	FIG00919961: hypothetical protein	bi	1	421	fig|573.2212.peg.421	100	FIG00919961: hypothetical protein	bi	1	4547	fig|573.2215.peg.4547	100	FIG00919961: hypothetical protein	bi	1	3052	fig|573.2241.peg.3052	100	FIG00919961: hypothetical protein
1	437	344	fig|573.1888.peg.437	5-methyltetrahydropteroyltriglutamate--homocysteine methyltransferase (EC 2.1.1.14)	bi	1	1189	fig|573.2207.peg.1189	100	5-methyltetrahydropteroyltriglutamate--homocysteine methyltransferase (EC 2.1.1.14)	bi	1	422	fig|573.2212.peg.422	100	5-methyltetrahydropteroyltriglutamate--homocysteine methyltransferase (EC 2.1.1.14)	bi	1	4546	fig|573.2215.peg.4546	100	5-methyltetrahydropteroyltriglutamate--homocysteine methyltransferase (EC 2.1.1.14)	bi	1	3051	fig|573.2241.peg.3051	100	5-methyltetrahydropteroyltriglutamate--homocysteine methyltransferase (EC 2.1.1.14)
1	438	396	fig|573.1888.peg.438	Transporter, MFS superfamily	bi	1	1188	fig|573.2207.peg.1188	100	Transporter, MFS superfamily	bi	1	423	fig|573.2212.peg.423	100	Transporter, MFS superfamily	bi	1	4545	fig|573.2215.peg.4545	100	Transporter, MFS superfamily	bi	1	3050	fig|573.2241.peg.3050	99.75	Transporter, MFS superfamily
1	439	254	fig|573.1888.peg.439	ABC transporter (iron.B12.siderophore.hemin) , ATP-binding component	bi	1	1187	fig|573.2207.peg.1187	100	ABC transporter (iron.B12.siderophore.hemin) , ATP-binding component	bi	1	424	fig|573.2212.peg.424	100	ABC transporter (iron.B12.siderophore.hemin) , ATP-binding component	bi	1	4544	fig|573.2215.peg.4544	100	ABC transporter (iron.B12.siderophore.hemin) , ATP-binding component	bi	1	3049	fig|573.2241.peg.3049	98.81	ABC transporter (iron.B12.siderophore.hemin) , ATP-binding component
1	440	346	fig|573.1888.peg.440	ABC transporter (iron.B12.siderophore.hemin) , permease component	bi	1	1186	fig|573.2207.peg.1186	100	ABC transporter (iron.B12.siderophore.hemin) , permease component	bi	1	425	fig|573.2212.peg.425	100	ABC transporter (iron.B12.siderophore.hemin) , permease component	bi	1	4543	fig|573.2215.peg.4543	100	ABC transporter (iron.B12.siderophore.hemin) , permease component	bi	1	3048	fig|573.2241.peg.3048	100	ABC transporter (iron.B12.siderophore.hemin) , permease component
1	441	333	fig|573.1888.peg.441	ABC transporter (iron.B12.siderophore.hemin) , periplasmic substrate-binding component	bi	1	1185	fig|573.2207.peg.1185	100	ABC transporter (iron.B12.siderophore.hemin) , periplasmic substrate-binding component	bi	1	426	fig|573.2212.peg.426	100	ABC transporter (iron.B12.siderophore.hemin) , periplasmic substrate-binding component	bi	1	4542	fig|573.2215.peg.4542	100	ABC transporter (iron.B12.siderophore.hemin) , periplasmic substrate-binding component	bi	1	3047	fig|573.2241.peg.3047	99.1	ABC transporter (iron.B12.siderophore.hemin) , periplasmic substrate-binding component
1	442	304	fig|573.1888.peg.442	Transcriptional regulator, LysR family	bi	1	1184	fig|573.2207.peg.1184	100	Transcriptional regulator, LysR family	bi	1	427	fig|573.2212.peg.427	100	Transcriptional regulator, LysR family	bi	1	4541	fig|573.2215.peg.4541	100	Transcriptional regulator, LysR family	bi	1	3046	fig|573.2241.peg.3046	98.68	Transcriptional regulator, LysR family
1	443	332	fig|573.1888.peg.443	Nucleoside-diphosphate-sugar epimerases	bi	1	1183	fig|573.2207.peg.1183	100	Nucleoside-diphosphate-sugar epimerases	bi	1	428	fig|573.2212.peg.428	100	Nucleoside-diphosphate-sugar epimerases	bi	1	4540	fig|573.2215.peg.4540	100	Nucleoside-diphosphate-sugar epimerases	bi	1	3045	fig|573.2241.peg.3045	99.09	Nucleoside-diphosphate-sugar epimerases
1	444	179	fig|573.1888.peg.444	Transcriptional regulator, TetR family	bi	1	1182	fig|573.2207.peg.1182	100	Transcriptional regulator, TetR family	bi	1	429	fig|573.2212.peg.429	100	Transcriptional regulator, TetR family	bi	1	4539	fig|573.2215.peg.4539	100	Transcriptional regulator, TetR family	bi	1	3044	fig|573.2241.peg.3044	100	Transcriptional regulator, TetR family
1	445	370	fig|573.1888.peg.445	Probable Co/Zn/Cd efflux system membrane fusion protein	bi	1	1181	fig|573.2207.peg.1181	100	Probable Co/Zn/Cd efflux system membrane fusion protein	bi	1	430	fig|573.2212.peg.430	100	Probable Co/Zn/Cd efflux system membrane fusion protein	bi	1	4538	fig|573.2215.peg.4538	99.73	Probable Co/Zn/Cd efflux system membrane fusion protein	bi	1	3043	fig|573.2241.peg.3043	99.46	Probable Co/Zn/Cd efflux system membrane fusion protein
1	446	1031	fig|573.1888.peg.446	Cation efflux system protein	bi	1	1180	fig|573.2207.peg.1180	100	Cation efflux system protein	bi	1	431	fig|573.2212.peg.431	99.9	Cation efflux system protein	bi	1	4537	fig|573.2215.peg.4537	100	Cation efflux system protein	bi	1	3042	fig|573.2241.peg.3042	98.64	Cation efflux system protein
1	447	395	fig|573.1888.peg.447	L-lactate dehydrogenase (EC 1.1.2.3)	bi	1	1179	fig|573.2207.peg.1179	100	L-lactate dehydrogenase (EC 1.1.2.3)	bi	1	432	fig|573.2212.peg.432	100	L-lactate dehydrogenase (EC 1.1.2.3)	bi	1	4536	fig|573.2215.peg.4536	100	L-lactate dehydrogenase (EC 1.1.2.3)	bi	1	3041	fig|573.2241.peg.3041	99.75	L-lactate dehydrogenase (EC 1.1.2.3)
1	448	211	fig|573.1888.peg.448	Transcriptional regulator, TetR family	bi	1	1178	fig|573.2207.peg.1178	100	Transcriptional regulator, TetR family	bi	1	433	fig|573.2212.peg.433	100	Transcriptional regulator, TetR family	bi	1	4535	fig|573.2215.peg.4535	100	Transcriptional regulator, TetR family	bi	1	3040	fig|573.2241.peg.3040	100	Transcriptional regulator, TetR family
1	449	115	fig|573.1888.peg.449	protein	bi	1	1177	fig|573.2207.peg.1177	100	protein	bi	1	434	fig|573.2212.peg.434	99.12	protein	bi	1	4534	fig|573.2215.peg.4534	100	protein	bi	1	3039	fig|573.2241.peg.3039	98.25	protein
1	450	66	fig|573.1888.peg.450	FIG00731379: hypothetical protein	bi	1	1176	fig|573.2207.peg.1176	100	FIG00731379: hypothetical protein	bi	1	435	fig|573.2212.peg.435	100	FIG00731379: hypothetical protein	bi	1	4533	fig|573.2215.peg.4533	100	FIG00731379: hypothetical protein	bi	1	3038	fig|573.2241.peg.3038	100	FIG00731379: hypothetical protein
1	451	126	fig|573.1888.peg.451	Iron binding protein SufA for iron-sulfur cluster assembly	bi	1	1175	fig|573.2207.peg.1175	100	Iron binding protein SufA for iron-sulfur cluster assembly	bi	1	436	fig|573.2212.peg.436	100	Iron binding protein SufA for iron-sulfur cluster assembly	bi	1	4532	fig|573.2215.peg.4532	100	Iron binding protein SufA for iron-sulfur cluster assembly	bi	1	3037	fig|573.2241.peg.3037	100	Iron binding protein SufA for iron-sulfur cluster assembly
1	452	496	fig|573.1888.peg.452	Iron-sulfur cluster assembly protein SufB	bi	1	1174	fig|573.2207.peg.1174	100	Iron-sulfur cluster assembly protein SufB	bi	1	437	fig|573.2212.peg.437	100	Iron-sulfur cluster assembly protein SufB	bi	1	4531	fig|573.2215.peg.4531	100	Iron-sulfur cluster assembly protein SufB	bi	1	3036	fig|573.2241.peg.3036	100	Iron-sulfur cluster assembly protein SufB
1	453	249	fig|573.1888.peg.453	Iron-sulfur cluster assembly ATPase protein SufC	bi	1	1173	fig|573.2207.peg.1173	100	Iron-sulfur cluster assembly ATPase protein SufC	bi	1	438	fig|573.2212.peg.438	99.6	Iron-sulfur cluster assembly ATPase protein SufC	bi	1	4530	fig|573.2215.peg.4530	100	Iron-sulfur cluster assembly ATPase protein SufC	bi	1	3035	fig|573.2241.peg.3035	100	Iron-sulfur cluster assembly ATPase protein SufC
1	454	425	fig|573.1888.peg.454	Iron-sulfur cluster assembly protein SufD	bi	1	1172	fig|573.2207.peg.1172	100	Iron-sulfur cluster assembly protein SufD	bi	1	439	fig|573.2212.peg.439	100	Iron-sulfur cluster assembly protein SufD	bi	1	4529	fig|573.2215.peg.4529	100	Iron-sulfur cluster assembly protein SufD	bi	1	3034	fig|573.2241.peg.3034	99.53	Iron-sulfur cluster assembly protein SufD
1	455	407	fig|573.1888.peg.455	Cysteine desulfurase (EC 2.8.1.7), SufS subfamily	bi	1	1171	fig|573.2207.peg.1171	99.75	Cysteine desulfurase (EC 2.8.1.7), SufS subfamily	bi	1	440	fig|573.2212.peg.440	99.01	Cysteine desulfurase (EC 2.8.1.7), SufS subfamily	bi	1	4528	fig|573.2215.peg.4528	99.75	Cysteine desulfurase (EC 2.8.1.7), SufS subfamily	bi	1	3033	fig|573.2241.peg.3033	99.75	Cysteine desulfurase (EC 2.8.1.7), SufS subfamily
1	456	139	fig|573.1888.peg.456	Sulfur acceptor protein SufE for iron-sulfur cluster assembly	bi	1	1170	fig|573.2207.peg.1170	100	Sulfur acceptor protein SufE for iron-sulfur cluster assembly	bi	1	441	fig|573.2212.peg.441	100	Sulfur acceptor protein SufE for iron-sulfur cluster assembly	bi	1	4527	fig|573.2215.peg.4527	100	Sulfur acceptor protein SufE for iron-sulfur cluster assembly	bi	1	3032	fig|573.2241.peg.3032	99.28	Sulfur acceptor protein SufE for iron-sulfur cluster assembly
1	457	329	fig|573.1888.peg.457	L,D-transpeptidase YnhG	bi	1	1169	fig|573.2207.peg.1169	100	L,D-transpeptidase YnhG	bi	1	442	fig|573.2212.peg.442	100	L,D-transpeptidase YnhG	bi	1	4526	fig|573.2215.peg.4526	100	L,D-transpeptidase YnhG	bi	1	3031	fig|573.2241.peg.3031	99.7	L,D-transpeptidase YnhG
1	458	79	fig|573.1888.peg.458	major outer membrane lipoprotein	bi	1	1168	fig|573.2207.peg.1168	100	major outer membrane lipoprotein	bi	1	443	fig|573.2212.peg.443	100	major outer membrane lipoprotein	bi	1	4525	fig|573.2215.peg.4525	100	major outer membrane lipoprotein	bi	1	3030	fig|573.2241.peg.3030	100	major outer membrane lipoprotein
1	459	471	fig|573.1888.peg.459	Pyruvate kinase (EC 2.7.1.40)	bi	1	1167	fig|573.2207.peg.1167	100	Pyruvate kinase (EC 2.7.1.40)	bi	1	444	fig|573.2212.peg.444	100	Pyruvate kinase (EC 2.7.1.40)	bi	1	4524	fig|573.2215.peg.4524	100	Pyruvate kinase (EC 2.7.1.40)	bi	1	3029	fig|573.2241.peg.3029	100	Pyruvate kinase (EC 2.7.1.40)
1	460	44	fig|573.1888.peg.460	hypothetical protein	-				0		-				0		-				0		-				0
1	461	53	fig|573.1888.peg.461	hypothetical protein	bi	1	1166	fig|573.2207.peg.1166	100	hypothetical protein	bi	1	445	fig|573.2212.peg.445	100	hypothetical protein	bi	1	4523	fig|573.2215.peg.4523	100	hypothetical protein	bi	1	3028	fig|573.2241.peg.3028	96.15	hypothetical protein
1	462	71	fig|573.1888.peg.462	FIG00637899: hypothetical protein	bi	1	1165	fig|573.2207.peg.1165	100	FIG00637899: hypothetical protein	bi	1	446	fig|573.2212.peg.446	100	FIG00637899: hypothetical protein	bi	1	4522	fig|573.2215.peg.4522	100	FIG00637899: hypothetical protein	bi	1	3027	fig|573.2241.peg.3027	100	FIG00637899: hypothetical protein
1	463	213	fig|573.1888.peg.463	Transcriptional regulator, TetR family	bi	1	1164	fig|573.2207.peg.1164	100	Transcriptional regulator, TetR family	bi	1	447	fig|573.2212.peg.447	100	Transcriptional regulator, TetR family	bi	1	4521	fig|573.2215.peg.4521	100	Transcriptional regulator, TetR family	bi	1	3026	fig|573.2241.peg.3026	100	Transcriptional regulator, TetR family
1	464	618	fig|573.1888.peg.464	4-hydroxyphenylpyruvate dioxygenase (EC 1.13.11.27)	bi	1	1163	fig|573.2207.peg.1163	100	4-hydroxyphenylpyruvate dioxygenase (EC 1.13.11.27)	bi	1	448	fig|573.2212.peg.448	100	4-hydroxyphenylpyruvate dioxygenase (EC 1.13.11.27)	bi	1	4520	fig|573.2215.peg.4520	99.84	4-hydroxyphenylpyruvate dioxygenase (EC 1.13.11.27)	bi	1	3025	fig|573.2241.peg.3025	99.68	4-hydroxyphenylpyruvate dioxygenase (EC 1.13.11.27)
1	465	441	fig|573.1888.peg.465	4-hydroxyphenylpyruvate dioxygenase (EC 1.13.11.27)	bi	1	1162	fig|573.2207.peg.1162	100	4-hydroxyphenylpyruvate dioxygenase (EC 1.13.11.27)	bi	1	449	fig|573.2212.peg.449	99.77	4-hydroxyphenylpyruvate dioxygenase (EC 1.13.11.27)	bi	1	4519	fig|573.2215.peg.4519	100	4-hydroxyphenylpyruvate dioxygenase (EC 1.13.11.27)	bi	1	3024	fig|573.2241.peg.3024	99.32	4-hydroxyphenylpyruvate dioxygenase (EC 1.13.11.27)
1	466	279	fig|573.1888.peg.466	Shikimate 5-dehydrogenase I alpha (EC 1.1.1.25)	bi	1	1161	fig|573.2207.peg.1161	100	Shikimate 5-dehydrogenase I alpha (EC 1.1.1.25)	bi	1	450	fig|573.2212.peg.450	100	Shikimate 5-dehydrogenase I alpha (EC 1.1.1.25)	bi	1	4518	fig|573.2215.peg.4518	100	Shikimate 5-dehydrogenase I alpha (EC 1.1.1.25)	bi	1	3023	fig|573.2241.peg.3023	99.64	Shikimate 5-dehydrogenase I alpha (EC 1.1.1.25)
1	467	248	fig|573.1888.peg.467	Molybdenum-binding periplasmic protein	bi	1	1160	fig|573.2207.peg.1160	100	Molybdenum-binding periplasmic protein	bi	1	451	fig|573.2212.peg.451	100	Molybdenum-binding periplasmic protein	bi	1	4517	fig|573.2215.peg.4517	100	Molybdenum-binding periplasmic protein	bi	1	3022	fig|573.2241.peg.3022	98.38	Molybdenum-binding periplasmic protein
1	468	250	fig|573.1888.peg.468	ABC-type cobalamin/Fe3+-siderophores transport systems, ATPase components	bi	1	1159	fig|573.2207.peg.1159	100	ABC-type cobalamin/Fe3+-siderophores transport systems, ATPase components	bi	1	452	fig|573.2212.peg.452	100	ABC-type cobalamin/Fe3+-siderophores transport systems, ATPase components	bi	1	4516	fig|573.2215.peg.4516	100	ABC-type cobalamin/Fe3+-siderophores transport systems, ATPase components	bi	1	3021	fig|573.2241.peg.3021	99.2	ABC-type cobalamin/Fe3+-siderophores transport systems, ATPase components
1	469	336	fig|573.1888.peg.469	ABC-type Fe3+-siderophore transport system, permease component	bi	1	1158	fig|573.2207.peg.1158	100	ABC-type Fe3+-siderophore transport system, permease component	bi	1	454	fig|573.2212.peg.454	100	ABC-type Fe3+-siderophore transport system, permease component	bi	1	4515	fig|573.2215.peg.4515	100	ABC-type Fe3+-siderophore transport system, permease component	bi	1	3020	fig|573.2241.peg.3020	98.51	ABC-type Fe3+-siderophore transport system, permease component
1	470	353	fig|573.1888.peg.470	Iron(III) ABC transporter, solute-binding protein	bi	1	1157	fig|573.2207.peg.1157	100	Iron(III) ABC transporter, solute-binding protein	bi	1	455	fig|573.2212.peg.455	100	Iron(III) ABC transporter, solute-binding protein	bi	1	4514	fig|573.2215.peg.4514	100	Iron(III) ABC transporter, solute-binding protein	bi	1	3019	fig|573.2241.peg.3019	98.3	Iron(III) ABC transporter, solute-binding protein
1	471	271	fig|573.1888.peg.471	Mhp operon transcriptional activator	bi	1	1156	fig|573.2207.peg.1156	100	Mhp operon transcriptional activator	bi	1	456	fig|573.2212.peg.456	100	Mhp operon transcriptional activator	bi	1	4513	fig|573.2215.peg.4513	100	Mhp operon transcriptional activator	bi	1	3018	fig|573.2241.peg.3018	99.26	Mhp operon transcriptional activator
1	472	555	fig|573.1888.peg.472	3-(3-hydroxy-phenyl)propionate hydroxylase (EC 1.14.13.-)	bi	1	1155	fig|573.2207.peg.1155	100	3-(3-hydroxy-phenyl)propionate hydroxylase (EC 1.14.13.-)	bi	1	457	fig|573.2212.peg.457	100	3-(3-hydroxy-phenyl)propionate hydroxylase (EC 1.14.13.-)	bi	1	4512	fig|573.2215.peg.4512	100	3-(3-hydroxy-phenyl)propionate hydroxylase (EC 1.14.13.-)	bi	1	3017	fig|573.2241.peg.3017	98.56	3-(3-hydroxy-phenyl)propionate hydroxylase (EC 1.14.13.-)
1	473	315	fig|573.1888.peg.473	2,3-dihydroxyphenylpropionate 1,2-dioxygenase (EC 1.13.11.-)	bi	1	1154	fig|573.2207.peg.1154	100	2,3-dihydroxyphenylpropionate 1,2-dioxygenase (EC 1.13.11.-)	bi	1	458	fig|573.2212.peg.458	100	2,3-dihydroxyphenylpropionate 1,2-dioxygenase (EC 1.13.11.-)	bi	1	4511	fig|573.2215.peg.4511	100	2,3-dihydroxyphenylpropionate 1,2-dioxygenase (EC 1.13.11.-)	bi	1	3016	fig|573.2241.peg.3016	99.36	2,3-dihydroxyphenylpropionate 1,2-dioxygenase (EC 1.13.11.-)
1	474	289	fig|573.1888.peg.474	2-hydroxy-6-ketonona-2,4-dienedioic acid hydrolase (EC 3.7.1.-)	bi	1	1153	fig|573.2207.peg.1153	100	2-hydroxy-6-ketonona-2,4-dienedioic acid hydrolase (EC 3.7.1.-)	bi	1	459	fig|573.2212.peg.459	100	2-hydroxy-6-ketonona-2,4-dienedioic acid hydrolase (EC 3.7.1.-)	bi	1	4510	fig|573.2215.peg.4510	100	2-hydroxy-6-ketonona-2,4-dienedioic acid hydrolase (EC 3.7.1.-)	bi	1	3015	fig|573.2241.peg.3015	99.65	2-hydroxy-6-ketonona-2,4-dienedioic acid hydrolase (EC 3.7.1.-)
1	475	269	fig|573.1888.peg.475	2-keto-4-pentenoate hydratase (EC 4.2.1.80)	bi	1	1152	fig|573.2207.peg.1152	100	2-keto-4-pentenoate hydratase (EC 4.2.1.80)	bi	1	460	fig|573.2212.peg.460	100	2-keto-4-pentenoate hydratase (EC 4.2.1.80)	bi	1	4509	fig|573.2215.peg.4509	99.63	2-keto-4-pentenoate hydratase (EC 4.2.1.80)	bi	1	3014	fig|573.2241.peg.3014	99.63	2-keto-4-pentenoate hydratase (EC 4.2.1.80)
1	476	317	fig|573.1888.peg.476	Acetaldehyde dehydrogenase, acetylating, (EC 1.2.1.10) in gene cluster for degradation of phenols, cresols, catechol	bi	1	1151	fig|573.2207.peg.1151	100	Acetaldehyde dehydrogenase, acetylating, (EC 1.2.1.10) in gene cluster for degradation of phenols, cresols, catechol	bi	1	461	fig|573.2212.peg.461	100	Acetaldehyde dehydrogenase, acetylating, (EC 1.2.1.10) in gene cluster for degradation of phenols, cresols, catechol	bi	1	4508	fig|573.2215.peg.4508	100	Acetaldehyde dehydrogenase, acetylating, (EC 1.2.1.10) in gene cluster for degradation of phenols, cresols, catechol	bi	1	3013	fig|573.2241.peg.3013	99.68	Acetaldehyde dehydrogenase, acetylating, (EC 1.2.1.10) in gene cluster for degradation of phenols, cresols, catechol
1	477	339	fig|573.1888.peg.477	4-hydroxy-2-oxovalerate aldolase (EC 4.1.3.39)	bi	1	1150	fig|573.2207.peg.1150	100	4-hydroxy-2-oxovalerate aldolase (EC 4.1.3.39)	bi	1	462	fig|573.2212.peg.462	100	4-hydroxy-2-oxovalerate aldolase (EC 4.1.3.39)	bi	1	4507	fig|573.2215.peg.4507	100	4-hydroxy-2-oxovalerate aldolase (EC 4.1.3.39)	bi	1	3012	fig|573.2241.peg.3012	99.7	4-hydroxy-2-oxovalerate aldolase (EC 4.1.3.39)
1	478	399	fig|573.1888.peg.478	4-hydroxybenzoate transporter	bi	1	1149	fig|573.2207.peg.1149	100	4-hydroxybenzoate transporter	bi	1	463	fig|573.2212.peg.463	100	4-hydroxybenzoate transporter	bi	1	4506	fig|573.2215.peg.4506	100	4-hydroxybenzoate transporter	bi	1	3011	fig|573.2241.peg.3011	98.24	4-hydroxybenzoate transporter
1	479	242	fig|573.1888.peg.479	COG1496: Uncharacterized conserved protein	bi	1	1148	fig|573.2207.peg.1148	100	COG1496: Uncharacterized conserved protein	bi	1	465	fig|573.2212.peg.465	100	COG1496: Uncharacterized conserved protein	bi	1	4505	fig|573.2215.peg.4505	100	COG1496: Uncharacterized conserved protein	bi	1	3010	fig|573.2241.peg.3010	99.17	COG1496: Uncharacterized conserved protein
1	480	527	fig|573.1888.peg.480	Rhodanese-related sulfurtransferase	bi	1	1147	fig|573.2207.peg.1147	100	Rhodanese-related sulfurtransferase	bi	1	466	fig|573.2212.peg.466	100	Rhodanese-related sulfurtransferase	bi	1	4504	fig|573.2215.peg.4504	100	Rhodanese-related sulfurtransferase	bi	1	3009	fig|573.2241.peg.3009	99.05	Rhodanese-related sulfurtransferase
1	481	201	fig|573.1888.peg.481	Cysteine dioxygenase (EC 1.13.11.20)	bi	1	1146	fig|573.2207.peg.1146	100	Cysteine dioxygenase (EC 1.13.11.20)	bi	1	467	fig|573.2212.peg.467	100	Cysteine dioxygenase (EC 1.13.11.20)	bi	1	4503	fig|573.2215.peg.4503	100	Cysteine dioxygenase (EC 1.13.11.20)	bi	1	3008	fig|573.2241.peg.3008	98	Cysteine dioxygenase (EC 1.13.11.20)
1	482	298	fig|573.1888.peg.482	Transcriptional regulator, LysR family	bi	1	1145	fig|573.2207.peg.1145	100	Transcriptional regulator, LysR family	bi	1	468	fig|573.2212.peg.468	100	Transcriptional regulator, LysR family	bi	1	4502	fig|573.2215.peg.4502	100	Transcriptional regulator, LysR family	bi	1	3007	fig|573.2241.peg.3007	99.33	Transcriptional regulator, LysR family
1	483	362	fig|573.1888.peg.483	Alkanesulfonate monooxygenase (EC 1.14.14.5)	bi	1	1144	fig|573.2207.peg.1144	100	Alkanesulfonate monooxygenase (EC 1.14.14.5)	bi	1	469	fig|573.2212.peg.469	100	Alkanesulfonate monooxygenase (EC 1.14.14.5)	bi	1	4501	fig|573.2215.peg.4501	100	Alkanesulfonate monooxygenase (EC 1.14.14.5)	bi	1	3006	fig|573.2241.peg.3006	99.17	Alkanesulfonate monooxygenase (EC 1.14.14.5)
1	484	378	fig|573.1888.peg.484	Butyryl-CoA dehydrogenase (EC 1.3.99.2)	bi	1	1143	fig|573.2207.peg.1143	100	Butyryl-CoA dehydrogenase (EC 1.3.99.2)	bi	1	470	fig|573.2212.peg.470	100	Butyryl-CoA dehydrogenase (EC 1.3.99.2)	bi	1	4500	fig|573.2215.peg.4500	100	Butyryl-CoA dehydrogenase (EC 1.3.99.2)	bi	1	3005	fig|573.2241.peg.3005	97.39	Butyryl-CoA dehydrogenase (EC 1.3.99.2)
1	485	321	fig|573.1888.peg.485	ABC-type nitrate/sulfonate/bicarbonate transport systems, periplasmic components	bi	1	1142	fig|573.2207.peg.1142	100	ABC-type nitrate/sulfonate/bicarbonate transport systems, periplasmic components	bi	1	471	fig|573.2212.peg.471	100	ABC-type nitrate/sulfonate/bicarbonate transport systems, periplasmic components	bi	1	4499	fig|573.2215.peg.4499	100	ABC-type nitrate/sulfonate/bicarbonate transport systems, periplasmic components	bi	1	3004	fig|573.2241.peg.3004	100	ABC-type nitrate/sulfonate/bicarbonate transport systems, periplasmic components
1	486	346	fig|573.1888.peg.486	ABC-type nitrate/sulfonate/bicarbonate transport systems, periplasmic components	bi	1	1141	fig|573.2207.peg.1141	100	ABC-type nitrate/sulfonate/bicarbonate transport systems, periplasmic components	bi	1	472	fig|573.2212.peg.472	99.71	ABC-type nitrate/sulfonate/bicarbonate transport systems, periplasmic components	bi	1	4498	fig|573.2215.peg.4498	99.71	ABC-type nitrate/sulfonate/bicarbonate transport systems, periplasmic components	bi	1	3003	fig|573.2241.peg.3003	99.42	ABC-type nitrate/sulfonate/bicarbonate transport systems, periplasmic components
1	487	332	fig|573.1888.peg.487	Alkanesulfonates transport system permease protein	bi	1	1140	fig|573.2207.peg.1140	100	Alkanesulfonates transport system permease protein	bi	1	473	fig|573.2212.peg.473	99.7	Alkanesulfonates transport system permease protein	bi	1	4497	fig|573.2215.peg.4497	99.7	Alkanesulfonates transport system permease protein	bi	1	3002	fig|573.2241.peg.3002	99.7	Alkanesulfonates transport system permease protein
1	488	258	fig|573.1888.peg.488	Alkanesulfonates ABC transporter ATP-binding protein / Sulfonate ABC transporter, ATP-binding subunit SsuB	bi	1	1139	fig|573.2207.peg.1139	100	Alkanesulfonates ABC transporter ATP-binding protein / Sulfonate ABC transporter, ATP-binding subunit SsuB	bi	1	474	fig|573.2212.peg.474	100	Alkanesulfonates ABC transporter ATP-binding protein / Sulfonate ABC transporter, ATP-binding subunit SsuB	bi	1	4496	fig|573.2215.peg.4496	100	Alkanesulfonates ABC transporter ATP-binding protein / Sulfonate ABC transporter, ATP-binding subunit SsuB	bi	1	3001	fig|573.2241.peg.3001	100	Alkanesulfonates ABC transporter ATP-binding protein / Sulfonate ABC transporter, ATP-binding subunit SsuB
1	489	691	fig|573.1888.peg.489	Ferrichrome-iron receptor	bi	1	1138	fig|573.2207.peg.1138	100	Ferrichrome-iron receptor	bi	1	475	fig|573.2212.peg.475	100	Ferrichrome-iron receptor	bi	1	4495	fig|573.2215.peg.4495	100	Ferrichrome-iron receptor	bi	1	3000	fig|573.2241.peg.3000	99.57	Ferrichrome-iron receptor
1	490	274	fig|573.1888.peg.490	transport; Transport of small molecules: Cations	bi	1	1137	fig|573.2207.peg.1137	100	transport; Transport of small molecules: Cations	bi	1	476	fig|573.2212.peg.476	100	transport; Transport of small molecules: Cations	bi	1	4494	fig|573.2215.peg.4494	100	transport; Transport of small molecules: Cations	bi	1	2999	fig|573.2241.peg.2999	99.27	transport; Transport of small molecules: Cations
1	491	342	fig|573.1888.peg.491	Putative iron compound permease protein of ABC transporter family	bi	1	1136	fig|573.2207.peg.1136	100	Putative iron compound permease protein of ABC transporter family	bi	1	477	fig|573.2212.peg.477	100	Putative iron compound permease protein of ABC transporter family	bi	1	4493	fig|573.2215.peg.4493	100	Putative iron compound permease protein of ABC transporter family	bi	1	2998	fig|573.2241.peg.2998	99.12	Putative iron compound permease protein of ABC transporter family
1	492	351	fig|573.1888.peg.492	putative permease of ferrichrome ABC transporter	bi	1	1135	fig|573.2207.peg.1135	100	putative permease of ferrichrome ABC transporter	bi	1	478	fig|573.2212.peg.478	99.71	putative permease of ferrichrome ABC transporter	bi	1	4492	fig|573.2215.peg.4492	100	putative permease of ferrichrome ABC transporter	bi	1	2997	fig|573.2241.peg.2997	99.14	putative permease of ferrichrome ABC transporter
1	493	318	fig|573.1888.peg.493	Putative iron compound-binding protein of ABC transporter family	bi	1	1134	fig|573.2207.peg.1134	100	Putative iron compound-binding protein of ABC transporter family	bi	1	479	fig|573.2212.peg.479	100	Putative iron compound-binding protein of ABC transporter family	bi	1	4491	fig|573.2215.peg.4491	100	Putative iron compound-binding protein of ABC transporter family	bi	1	2996	fig|573.2241.peg.2996	99.37	Putative iron compound-binding protein of ABC transporter family
1	494	301	fig|573.1888.peg.494	FIG00732392: hypothetical protein	bi	1	1133	fig|573.2207.peg.1133	100	FIG00732392: hypothetical protein	bi	1	480	fig|573.2212.peg.480	100	FIG00732392: hypothetical protein	bi	1	4490	fig|573.2215.peg.4490	100	FIG00732392: hypothetical protein	bi	1	2995	fig|573.2241.peg.2995	99.33	FIG00732392: hypothetical protein
1	495	256	fig|573.1888.peg.495	Glutamine ABC transporter, periplasmic glutamine-binding protein (TC 3.A.1.3.2)	bi	1	1132	fig|573.2207.peg.1132	100	Glutamine ABC transporter, periplasmic glutamine-binding protein (TC 3.A.1.3.2)	bi	1	481	fig|573.2212.peg.481	100	Glutamine ABC transporter, periplasmic glutamine-binding protein (TC 3.A.1.3.2)	bi	1	4489	fig|573.2215.peg.4489	100	Glutamine ABC transporter, periplasmic glutamine-binding protein (TC 3.A.1.3.2)	bi	1	2994	fig|573.2241.peg.2994	100	Glutamine ABC transporter, periplasmic glutamine-binding protein (TC 3.A.1.3.2)
1	496	255	fig|573.1888.peg.496	Amino acid ABC transporter, permease protein	bi	1	1131	fig|573.2207.peg.1131	100	Amino acid ABC transporter, permease protein	bi	1	482	fig|573.2212.peg.482	100	Amino acid ABC transporter, permease protein	bi	1	4488	fig|573.2215.peg.4488	100	Amino acid ABC transporter, permease protein	bi	1	2993	fig|573.2241.peg.2993	100	Amino acid ABC transporter, permease protein
1	497	241	fig|573.1888.peg.497	transport; Transport of small molecules: Cations	bi	1	1130	fig|573.2207.peg.1130	100	transport; Transport of small molecules: Cations	bi	1	483	fig|573.2212.peg.483	100	transport; Transport of small molecules: Cations	bi	1	4487	fig|573.2215.peg.4487	100	transport; Transport of small molecules: Cations	bi	1	2992	fig|573.2241.peg.2992	99.58	transport; Transport of small molecules: Cations
1	498	196	fig|573.1888.peg.498	FIG074102: hypothetical protein	bi	1	1129	fig|573.2207.peg.1129	100	FIG074102: hypothetical protein	bi	1	484	fig|573.2212.peg.484	100	FIG074102: hypothetical protein	bi	1	4486	fig|573.2215.peg.4486	100	FIG074102: hypothetical protein	bi	1	2991	fig|573.2241.peg.2991	97.44	FIG074102: hypothetical protein
1	499	131	fig|573.1888.peg.499	Lactoylglutathione lyase and related lyases	bi	1	1128	fig|573.2207.peg.1128	100	Lactoylglutathione lyase and related lyases	bi	1	485	fig|573.2212.peg.485	100	Lactoylglutathione lyase and related lyases	bi	1	4485	fig|573.2215.peg.4485	100	Lactoylglutathione lyase and related lyases	bi	1	2990	fig|573.2241.peg.2990	98.46	Lactoylglutathione lyase and related lyases
1	500	411	fig|573.1888.peg.500	FIG00731878: hypothetical protein	bi	1	1127	fig|573.2207.peg.1127	100	FIG00731878: hypothetical protein	bi	1	486	fig|573.2212.peg.486	100	FIG00731878: hypothetical protein	bi	1	4484	fig|573.2215.peg.4484	100	FIG00731878: hypothetical protein	bi	1	2989	fig|573.2241.peg.2989	99.51	FIG00731878: hypothetical protein
1	501	145	fig|573.1888.peg.501	Lactoylglutathione lyase and related lyases	bi	1	1126	fig|573.2207.peg.1126	100	Lactoylglutathione lyase and related lyases	bi	1	487	fig|573.2212.peg.487	100	Lactoylglutathione lyase and related lyases	bi	1	4483	fig|573.2215.peg.4483	100	Lactoylglutathione lyase and related lyases	bi	1	2988	fig|573.2241.peg.2988	97.22	Lactoylglutathione lyase and related lyases
1	502	400	fig|573.1888.peg.502	Transporter, MFS superfamily	bi	1	1125	fig|573.2207.peg.1125	100	Transporter, MFS superfamily	bi	1	488	fig|573.2212.peg.488	100	Transporter, MFS superfamily	bi	1	4482	fig|573.2215.peg.4482	100	Transporter, MFS superfamily	bi	1	2987	fig|573.2241.peg.2987	100	Transporter, MFS superfamily
1	503	386	fig|573.1888.peg.503	Metal-dependent amidase/aminoacylase/carboxypeptidase	bi	1	1124	fig|573.2207.peg.1124	100	Metal-dependent amidase/aminoacylase/carboxypeptidase	bi	1	489	fig|573.2212.peg.489	100	Metal-dependent amidase/aminoacylase/carboxypeptidase	bi	1	4481	fig|573.2215.peg.4481	100	Metal-dependent amidase/aminoacylase/carboxypeptidase	bi	1	2986	fig|573.2241.peg.2986	99.48	Metal-dependent amidase/aminoacylase/carboxypeptidase
1	504	717	fig|573.1888.peg.504	Formate dehydrogenase H (EC 1.2.1.2)	bi	1	1123	fig|573.2207.peg.1123	100	Formate dehydrogenase H (EC 1.2.1.2)	bi	1	490	fig|573.2212.peg.490	100	Formate dehydrogenase H (EC 1.2.1.2)	bi	1	4480	fig|573.2215.peg.4480	100	Formate dehydrogenase H (EC 1.2.1.2)	bi	1	2985	fig|573.2241.peg.2985	100	Formate dehydrogenase H (EC 1.2.1.2)
1	505	360	fig|573.1888.peg.505	Malate dehydrogenase (EC 1.1.1.37)	bi	1	1122	fig|573.2207.peg.1122	100	Malate dehydrogenase (EC 1.1.1.37)	bi	1	491	fig|573.2212.peg.491	100	Malate dehydrogenase (EC 1.1.1.37)	bi	1	4479	fig|573.2215.peg.4479	100	Malate dehydrogenase (EC 1.1.1.37)	bi	1	2984	fig|573.2241.peg.2984	99.72	Malate dehydrogenase (EC 1.1.1.37)
1	506	79	fig|573.1888.peg.506	hypothetical protein	bi	1	1121	fig|573.2207.peg.1121	100	hypothetical protein	bi	1	492	fig|573.2212.peg.492	100	hypothetical protein	-				0		bi	1	2983	fig|573.2241.peg.2983	100	hypothetical protein
1	507	363	fig|573.1888.peg.507	Putative ABC transporter, periplasmmic iron binding protein precursor	bi	1	1120	fig|573.2207.peg.1120	100	Putative ABC transporter, periplasmmic iron binding protein precursor	bi	1	493	fig|573.2212.peg.493	100	Putative ABC transporter, periplasmmic iron binding protein precursor	bi	1	4478	fig|573.2215.peg.4478	100	Putative ABC transporter, periplasmmic iron binding protein precursor	bi	1	2982	fig|573.2241.peg.2982	100	Putative ABC transporter, periplasmmic iron binding protein precursor
1	508	590	fig|573.1888.peg.508	Ferric iron ABC transporter, permease protein	bi	1	1119	fig|573.2207.peg.1119	100	Ferric iron ABC transporter, permease protein	bi	1	494	fig|573.2212.peg.494	100	Ferric iron ABC transporter, permease protein	bi	1	4477	fig|573.2215.peg.4477	100	Ferric iron ABC transporter, permease protein	bi	1	2981	fig|573.2241.peg.2981	99.66	Ferric iron ABC transporter, permease protein
1	509	357	fig|573.1888.peg.509	Probable ABC transporter, ATP-binding subunit	bi	1	1118	fig|573.2207.peg.1118	100	Probable ABC transporter, ATP-binding subunit	bi	1	495	fig|573.2212.peg.495	99.72	Probable ABC transporter, ATP-binding subunit	bi	1	4476	fig|573.2215.peg.4476	99.72	Probable ABC transporter, ATP-binding subunit	bi	1	2980	fig|573.2241.peg.2980	99.44	Probable ABC transporter, ATP-binding subunit
1	510	43	fig|573.1888.peg.510	hypothetical protein	bi	1	1117	fig|573.2207.peg.1117	100	hypothetical protein	bi	1	496	fig|573.2212.peg.496	100	hypothetical protein	bi	1	4475	fig|573.2215.peg.4475	100	hypothetical protein	-				0
1	511	799	fig|573.1888.peg.511	CRISPR-associated helicase Cas3	bi	1	1116	fig|573.2207.peg.1116	100	CRISPR-associated helicase Cas3	bi	1	497	fig|573.2212.peg.497	100	CRISPR-associated helicase Cas3	bi	1	4474	fig|573.2215.peg.4474	99.62	CRISPR-associated helicase Cas3	-				0
1	512	506	fig|573.1888.peg.512	CRISPR-associated protein, Cse1 family	bi	1	1115	fig|573.2207.peg.1115	98.79	CRISPR-associated protein, Cse1 family	bi	1	498	fig|573.2212.peg.498	98.79	CRISPR-associated protein, Cse1 family	bi	1	4473	fig|573.2215.peg.4473	98.79	CRISPR-associated protein, Cse1 family	-				0
1	513	201	fig|573.1888.peg.513	Mobile element protein	uni	1	1108	fig|573.2207.peg.1108	100	Mobile element protein	uni	1	1753	fig|573.2212.peg.1753	100	Mobile element protein	uni	1	763	fig|573.2215.peg.763	100	Mobile element protein	-				0
1	514	189	fig|573.1888.peg.514	CRISPR-associated protein, Cse2 family	bi	1	1114	fig|573.2207.peg.1114	100	CRISPR-associated protein, Cse2 family	bi	1	499	fig|573.2212.peg.499	100	CRISPR-associated protein, Cse2 family	bi	1	4472	fig|573.2215.peg.4472	100	CRISPR-associated protein, Cse2 family	-				0
1	515	216	fig|573.1888.peg.515	CRISPR-associated protein, Cse3 family	bi	1	1113	fig|573.2207.peg.1113	100	CRISPR-associated protein, Cse3 family	bi	1	500	fig|573.2212.peg.500	100	CRISPR-associated protein, Cse3 family	bi	1	4471	fig|573.2215.peg.4471	100	CRISPR-associated protein, Cse3 family	-				0
1	516	345	fig|573.1888.peg.516	CRISPR-associated protein, Cse4 family	bi	1	1112	fig|573.2207.peg.1112	100	CRISPR-associated protein, Cse4 family	bi	1	501	fig|573.2212.peg.501	100	CRISPR-associated protein, Cse4 family	bi	1	4470	fig|573.2215.peg.4470	99.71	CRISPR-associated protein, Cse4 family	-				0
1	517	232	fig|573.1888.peg.517	CRISPR-associated protein, Cas5e family	bi	1	1111	fig|573.2207.peg.1111	100	CRISPR-associated protein, Cas5e family	bi	1	502	fig|573.2212.peg.502	100	CRISPR-associated protein, Cas5e family	bi	1	4469	fig|573.2215.peg.4469	99.57	CRISPR-associated protein, Cas5e family	-				0
1	518	292	fig|573.1888.peg.518	CRISPR-associated protein Cas1	bi	1	1110	fig|573.2207.peg.1110	100	CRISPR-associated protein Cas1	bi	1	503	fig|573.2212.peg.503	100	CRISPR-associated protein Cas1	bi	1	4468	fig|573.2215.peg.4468	99.66	CRISPR-associated protein Cas1	-				0
1	519	80	fig|573.1888.peg.519	CRISPR-associated protein, Cas2	bi	1	1109	fig|573.2207.peg.1109	100	CRISPR-associated protein, Cas2	bi	1	504	fig|573.2212.peg.504	100	CRISPR-associated protein, Cas2	bi	1	4467	fig|573.2215.peg.4467	100	CRISPR-associated protein, Cas2	-				0
1	520	201	fig|573.1888.peg.520	Mobile element protein	uni	1	1108	fig|573.2207.peg.1108	100	Mobile element protein	uni	1	1753	fig|573.2212.peg.1753	100	Mobile element protein	uni	1	763	fig|573.2215.peg.763	100	Mobile element protein	-				0
1	521	372	fig|573.1888.peg.521	hypothetical protein	bi	1	1107	fig|573.2207.peg.1107	100	hypothetical protein	bi	1	505	fig|573.2212.peg.505	100	hypothetical protein	bi	1	4466	fig|573.2215.peg.4466	98.92	FIG00510729: hypothetical protein	-				0
1	522	176	fig|573.1888.peg.522	hypothetical protein	bi	1	1106	fig|573.2207.peg.1106	100	hypothetical protein	bi	1	506	fig|573.2212.peg.506	100	hypothetical protein	bi	1	4465	fig|573.2215.peg.4465	100	hypothetical protein	-				0
1	523	124	fig|573.1888.peg.523	Lactoylglutathione lyase and related lyases	bi	1	1105	fig|573.2207.peg.1105	100	Lactoylglutathione lyase and related lyases	bi	1	507	fig|573.2212.peg.507	100	Lactoylglutathione lyase and related lyases	bi	1	4464	fig|573.2215.peg.4464	100	Lactoylglutathione lyase and related lyases	bi	1	2979	fig|573.2241.peg.2979	100	Lactoylglutathione lyase and related lyases
1	524	252	fig|573.1888.peg.524	Gluconate 2-dehydrogenase (EC 1.1.99.3), membrane-bound, gamma subunit	bi	1	1104	fig|573.2207.peg.1104	100	Gluconate 2-dehydrogenase (EC 1.1.99.3), membrane-bound, gamma subunit	bi	1	508	fig|573.2212.peg.508	99.6	Gluconate 2-dehydrogenase (EC 1.1.99.3), membrane-bound, gamma subunit	bi	1	4463	fig|573.2215.peg.4463	99.2	Gluconate 2-dehydrogenase (EC 1.1.99.3), membrane-bound, gamma subunit	bi	1	2978	fig|573.2241.peg.2978	100	Gluconate 2-dehydrogenase (EC 1.1.99.3), membrane-bound, gamma subunit
1	525	595	fig|573.1888.peg.525	Gluconate 2-dehydrogenase (EC 1.1.99.3), membrane-bound, flavoprotein	bi	1	1103	fig|573.2207.peg.1103	100	Gluconate 2-dehydrogenase (EC 1.1.99.3), membrane-bound, flavoprotein	bi	1	509	fig|573.2212.peg.509	100	Gluconate 2-dehydrogenase (EC 1.1.99.3), membrane-bound, flavoprotein	bi	1	4462	fig|573.2215.peg.4462	100	Gluconate 2-dehydrogenase (EC 1.1.99.3), membrane-bound, flavoprotein	bi	1	2977	fig|573.2241.peg.2977	100	Gluconate 2-dehydrogenase (EC 1.1.99.3), membrane-bound, flavoprotein
1	526	447	fig|573.1888.peg.526	Gluconate 2-dehydrogenase (EC 1.1.99.3), membrane-bound, cytochrome c	bi	1	1102	fig|573.2207.peg.1102	100	Gluconate 2-dehydrogenase (EC 1.1.99.3), membrane-bound, cytochrome c	bi	1	510	fig|573.2212.peg.510	100	Gluconate 2-dehydrogenase (EC 1.1.99.3), membrane-bound, cytochrome c	bi	1	4461	fig|573.2215.peg.4461	99.78	Gluconate 2-dehydrogenase (EC 1.1.99.3), membrane-bound, cytochrome c	bi	1	2976	fig|573.2241.peg.2976	100	Gluconate 2-dehydrogenase (EC 1.1.99.3), membrane-bound, cytochrome c
1	527	208	fig|573.1888.peg.527	ABC transporter involved in cytochrome c biogenesis, ATPase component CcmA	bi	1	1101	fig|573.2207.peg.1101	100	ABC transporter involved in cytochrome c biogenesis, ATPase component CcmA	bi	1	511	fig|573.2212.peg.511	100	ABC transporter involved in cytochrome c biogenesis, ATPase component CcmA	bi	1	4460	fig|573.2215.peg.4460	100	ABC transporter involved in cytochrome c biogenesis, ATPase component CcmA	bi	1	2975	fig|573.2241.peg.2975	98.55	ABC transporter involved in cytochrome c biogenesis, ATPase component CcmA
1	528	219	fig|573.1888.peg.528	ABC transporter involved in cytochrome c biogenesis, CcmB subunit	bi	1	1100	fig|573.2207.peg.1100	100	ABC transporter involved in cytochrome c biogenesis, CcmB subunit	bi	1	512	fig|573.2212.peg.512	100	ABC transporter involved in cytochrome c biogenesis, CcmB subunit	bi	1	4459	fig|573.2215.peg.4459	100	ABC transporter involved in cytochrome c biogenesis, CcmB subunit	bi	1	2974	fig|573.2241.peg.2974	99.08	ABC transporter involved in cytochrome c biogenesis, CcmB subunit
1	529	246	fig|573.1888.peg.529	Cytochrome c-type biogenesis protein CcmC, putative heme lyase for CcmE	bi	1	1099	fig|573.2207.peg.1099	100	Cytochrome c-type biogenesis protein CcmC, putative heme lyase for CcmE	bi	1	513	fig|573.2212.peg.513	100	Cytochrome c-type biogenesis protein CcmC, putative heme lyase for CcmE	bi	1	4458	fig|573.2215.peg.4458	100	Cytochrome c-type biogenesis protein CcmC, putative heme lyase for CcmE	bi	1	2973	fig|573.2241.peg.2973	99.59	Cytochrome c-type biogenesis protein CcmC, putative heme lyase for CcmE
1	530	77	fig|573.1888.peg.530	Cytochrome c-type biogenesis protein CcmD, interacts with CcmCE	bi	1	1098	fig|573.2207.peg.1098	100	Cytochrome c-type biogenesis protein CcmD, interacts with CcmCE	bi	1	514	fig|573.2212.peg.514	100	Cytochrome c-type biogenesis protein CcmD, interacts with CcmCE	bi	1	4457	fig|573.2215.peg.4457	100	Cytochrome c-type biogenesis protein CcmD, interacts with CcmCE	bi	1	2972	fig|573.2241.peg.2972	100	Cytochrome c-type biogenesis protein CcmD, interacts with CcmCE
1	531	153	fig|573.1888.peg.531	Cytochrome c-type biogenesis protein CcmE, heme chaperone	bi	1	1097	fig|573.2207.peg.1097	100	Cytochrome c-type biogenesis protein CcmE, heme chaperone	bi	1	515	fig|573.2212.peg.515	100	Cytochrome c-type biogenesis protein CcmE, heme chaperone	bi	1	4456	fig|573.2215.peg.4456	100	Cytochrome c-type biogenesis protein CcmE, heme chaperone	bi	1	2971	fig|573.2241.peg.2971	98.68	Cytochrome c-type biogenesis protein CcmE, heme chaperone
1	532	651	fig|573.1888.peg.532	Cytochrome c heme lyase subunit CcmF	bi	1	1096	fig|573.2207.peg.1096	100	Cytochrome c heme lyase subunit CcmF	bi	1	516	fig|573.2212.peg.516	100	Cytochrome c heme lyase subunit CcmF	bi	1	4455	fig|573.2215.peg.4455	100	Cytochrome c heme lyase subunit CcmF	bi	1	2970	fig|573.2241.peg.2970	99.38	Cytochrome c heme lyase subunit CcmF
1	533	185	fig|573.1888.peg.533	Cytochrome c-type biogenesis protein CcmG/DsbE, thiol:disulfide oxidoreductase	bi	1	1095	fig|573.2207.peg.1095	100	Cytochrome c-type biogenesis protein CcmG/DsbE, thiol:disulfide oxidoreductase	bi	1	517	fig|573.2212.peg.517	100	Cytochrome c-type biogenesis protein CcmG/DsbE, thiol:disulfide oxidoreductase	bi	1	4454	fig|573.2215.peg.4454	100	Cytochrome c-type biogenesis protein CcmG/DsbE, thiol:disulfide oxidoreductase	bi	1	2969	fig|573.2241.peg.2969	100	Cytochrome c-type biogenesis protein CcmG/DsbE, thiol:disulfide oxidoreductase
1	534	163	fig|573.1888.peg.534	Cytochrome c heme lyase subunit CcmL	bi	1	1094	fig|573.2207.peg.1094	100	Cytochrome c heme lyase subunit CcmL	bi	1	518	fig|573.2212.peg.518	100	Cytochrome c heme lyase subunit CcmL	bi	1	4453	fig|573.2215.peg.4453	100	Cytochrome c heme lyase subunit CcmL	bi	1	2968	fig|573.2241.peg.2968	95.27	Cytochrome c heme lyase subunit CcmL
1	535	281	fig|573.1888.peg.535	Cytochrome c heme lyase subunit CcmH	bi	1	1093	fig|573.2207.peg.1093	100	Cytochrome c heme lyase subunit CcmH	bi	1	519	fig|573.2212.peg.519	100	Cytochrome c heme lyase subunit CcmH	bi	1	4452	fig|573.2215.peg.4452	100	Cytochrome c heme lyase subunit CcmH	bi	1	2967	fig|573.2241.peg.2967	98.57	Cytochrome c heme lyase subunit CcmH
1	536	52	fig|573.1888.peg.536	putative transcriptional regulator (LysR familiy)	bi	1	1092	fig|573.2207.peg.1092	100	putative transcriptional regulator (LysR familiy)	bi	1	520	fig|573.2212.peg.520	100	putative transcriptional regulator (LysR familiy)	bi	1	4451	fig|573.2215.peg.4451	100	putative transcriptional regulator (LysR familiy)	uni	1	2057	fig|573.2241.peg.2057	88.89	hypothetical protein
1	537	257	fig|573.1888.peg.537	2,3-butanediol dehydrogenase, S-alcohol forming, (R)-acetoin-specific (EC 1.1.1.4) / Acetoin (diacetyl) reductase (EC 1.1.1.304)	bi	1	1091	fig|573.2207.peg.1091	100	2,3-butanediol dehydrogenase, S-alcohol forming, (R)-acetoin-specific (EC 1.1.1.4) / Acetoin (diacetyl) reductase (EC 1.1.1.304)	bi	1	521	fig|573.2212.peg.521	100	2,3-butanediol dehydrogenase, S-alcohol forming, (R)-acetoin-specific (EC 1.1.1.4) / Acetoin (diacetyl) reductase (EC 1.1.1.304)	bi	1	4450	fig|573.2215.peg.4450	100	2,3-butanediol dehydrogenase, S-alcohol forming, (R)-acetoin-specific (EC 1.1.1.4) / Acetoin (diacetyl) reductase (EC 1.1.1.304)	bi	1	2957	fig|573.2241.peg.2957	100	2,3-butanediol dehydrogenase, S-alcohol forming, (R)-acetoin-specific (EC 1.1.1.4) / Acetoin (diacetyl) reductase (EC 1.1.1.304)
1	538	560	fig|573.1888.peg.538	Acetolactate synthase, catabolic (EC 2.2.1.6)	bi	1	1090	fig|573.2207.peg.1090	100	Acetolactate synthase, catabolic (EC 2.2.1.6)	bi	1	522	fig|573.2212.peg.522	100	Acetolactate synthase, catabolic (EC 2.2.1.6)	bi	1	4449	fig|573.2215.peg.4449	100	Acetolactate synthase, catabolic (EC 2.2.1.6)	bi	1	2956	fig|573.2241.peg.2956	99.82	Acetolactate synthase, catabolic (EC 2.2.1.6)
1	539	260	fig|573.1888.peg.539	Alpha-acetolactate decarboxylase (EC 4.1.1.5)	bi	1	1089	fig|573.2207.peg.1089	100	Alpha-acetolactate decarboxylase (EC 4.1.1.5)	bi	1	523	fig|573.2212.peg.523	100	Alpha-acetolactate decarboxylase (EC 4.1.1.5)	bi	1	4448	fig|573.2215.peg.4448	100	Alpha-acetolactate decarboxylase (EC 4.1.1.5)	bi	1	2955	fig|573.2241.peg.2955	99.61	Alpha-acetolactate decarboxylase (EC 4.1.1.5)
1	540	291	fig|573.1888.peg.540	LysR family transcriptional regulator STM3121	bi	1	1088	fig|573.2207.peg.1088	100	LysR family transcriptional regulator STM3121	bi	1	524	fig|573.2212.peg.524	100	LysR family transcriptional regulator STM3121	bi	1	4447	fig|573.2215.peg.4447	99.66	LysR family transcriptional regulator STM3121	bi	1	2954	fig|573.2241.peg.2954	100	LysR family transcriptional regulator STM3121
1	541	257	fig|573.1888.peg.541	D-beta-hydroxybutyrate dehydrogenase (EC 1.1.1.30)	bi	1	1087	fig|573.2207.peg.1087	100	D-beta-hydroxybutyrate dehydrogenase (EC 1.1.1.30)	bi	1	525	fig|573.2212.peg.525	100	D-beta-hydroxybutyrate dehydrogenase (EC 1.1.1.30)	bi	1	4446	fig|573.2215.peg.4446	100	D-beta-hydroxybutyrate dehydrogenase (EC 1.1.1.30)	bi	1	2953	fig|573.2241.peg.2953	100	D-beta-hydroxybutyrate dehydrogenase (EC 1.1.1.30)
1	542	465	fig|573.1888.peg.542	D-beta-hydroxybutyrate permease	bi	1	1086	fig|573.2207.peg.1086	100	D-beta-hydroxybutyrate permease	bi	1	526	fig|573.2212.peg.526	100	D-beta-hydroxybutyrate permease	bi	1	4445	fig|573.2215.peg.4445	100	D-beta-hydroxybutyrate permease	bi	1	2952	fig|573.2241.peg.2952	99.57	D-beta-hydroxybutyrate permease
1	543	308	fig|573.1888.peg.543	3-hydroxybutyryl-CoA dehydrogenase (EC 1.1.1.157); 3-hydroxyacyl-CoA dehydrogenase (EC 1.1.1.35)	bi	1	1085	fig|573.2207.peg.1085	100	3-hydroxybutyryl-CoA dehydrogenase (EC 1.1.1.157); 3-hydroxyacyl-CoA dehydrogenase (EC 1.1.1.35)	bi	1	527	fig|573.2212.peg.527	100	3-hydroxybutyryl-CoA dehydrogenase (EC 1.1.1.157); 3-hydroxyacyl-CoA dehydrogenase (EC 1.1.1.35)	bi	1	4444	fig|573.2215.peg.4444	100	3-hydroxybutyryl-CoA dehydrogenase (EC 1.1.1.157); 3-hydroxyacyl-CoA dehydrogenase (EC 1.1.1.35)	bi	1	2951	fig|573.2241.peg.2951	100	3-hydroxybutyryl-CoA dehydrogenase (EC 1.1.1.157); 3-hydroxyacyl-CoA dehydrogenase (EC 1.1.1.35)
1	544	394	fig|573.1888.peg.544	3-ketoacyl-CoA thiolase (EC 2.3.1.16); Acetyl-CoA acetyltransferase (EC 2.3.1.9)	bi	1	1084	fig|573.2207.peg.1084	100	3-ketoacyl-CoA thiolase (EC 2.3.1.16); Acetyl-CoA acetyltransferase (EC 2.3.1.9)	bi	1	528	fig|573.2212.peg.528	100	3-ketoacyl-CoA thiolase (EC 2.3.1.16); Acetyl-CoA acetyltransferase (EC 2.3.1.9)	bi	1	4443	fig|573.2215.peg.4443	100	3-ketoacyl-CoA thiolase (EC 2.3.1.16); Acetyl-CoA acetyltransferase (EC 2.3.1.9)	bi	1	2950	fig|573.2241.peg.2950	99.49	3-ketoacyl-CoA thiolase (EC 2.3.1.16); Acetyl-CoA acetyltransferase (EC 2.3.1.9)
1	545	219	fig|573.1888.peg.545	Succinyl-CoA:3-ketoacid-coenzyme A transferase subunit B (EC 2.8.3.5)	bi	1	1083	fig|573.2207.peg.1083	100	Succinyl-CoA:3-ketoacid-coenzyme A transferase subunit B (EC 2.8.3.5)	bi	1	529	fig|573.2212.peg.529	100	Succinyl-CoA:3-ketoacid-coenzyme A transferase subunit B (EC 2.8.3.5)	bi	1	4442	fig|573.2215.peg.4442	100	Succinyl-CoA:3-ketoacid-coenzyme A transferase subunit B (EC 2.8.3.5)	bi	1	2949	fig|573.2241.peg.2949	100	Succinyl-CoA:3-ketoacid-coenzyme A transferase subunit B (EC 2.8.3.5)
1	546	236	fig|573.1888.peg.546	Succinyl-CoA:3-ketoacid-coenzyme A transferase subunit A (EC 2.8.3.5)	bi	1	1082	fig|573.2207.peg.1082	100	Succinyl-CoA:3-ketoacid-coenzyme A transferase subunit A (EC 2.8.3.5)	bi	1	530	fig|573.2212.peg.530	100	Succinyl-CoA:3-ketoacid-coenzyme A transferase subunit A (EC 2.8.3.5)	bi	1	4441	fig|573.2215.peg.4441	100	Succinyl-CoA:3-ketoacid-coenzyme A transferase subunit A (EC 2.8.3.5)	bi	1	2948	fig|573.2241.peg.2948	100	Succinyl-CoA:3-ketoacid-coenzyme A transferase subunit A (EC 2.8.3.5)
1	547	297	fig|573.1888.peg.547	LysR family transcriptional regulator near succinyl-CoA:3-ketoacid-coenzyme A transferase	bi	1	1081	fig|573.2207.peg.1081	100	LysR family transcriptional regulator near succinyl-CoA:3-ketoacid-coenzyme A transferase	bi	1	531	fig|573.2212.peg.531	100	LysR family transcriptional regulator near succinyl-CoA:3-ketoacid-coenzyme A transferase	bi	1	4440	fig|573.2215.peg.4440	100	LysR family transcriptional regulator near succinyl-CoA:3-ketoacid-coenzyme A transferase	bi	1	2947	fig|573.2241.peg.2947	99.66	LysR family transcriptional regulator near succinyl-CoA:3-ketoacid-coenzyme A transferase
1	548	47	fig|573.1888.peg.548	hypothetical protein	bi	1	1080	fig|573.2207.peg.1080	100	hypothetical protein	bi	1	532	fig|573.2212.peg.532	100	hypothetical protein	bi	1	4439	fig|573.2215.peg.4439	100	hypothetical protein	bi	1	2946	fig|573.2241.peg.2946	100	hypothetical protein
1	549	303	fig|573.1888.peg.549	VirK	bi	1	1079	fig|573.2207.peg.1079	100	VirK	bi	1	533	fig|573.2212.peg.533	100	VirK	bi	1	4438	fig|573.2215.peg.4438	100	VirK	bi	1	2945	fig|573.2241.peg.2945	99.67	VirK
1	550	60	fig|573.1888.peg.550	Transcriptional regulator, HxlR family	bi	1	1078	fig|573.2207.peg.1078	100	Transcriptional regulator, HxlR family	bi	1	534	fig|573.2212.peg.534	100	Transcriptional regulator, HxlR family	bi	1	4437	fig|573.2215.peg.4437	100	Transcriptional regulator, HxlR family	bi	1	2944	fig|573.2241.peg.2944	98.31	Transcriptional regulator, HxlR family
1	551	474	fig|573.1888.peg.551	FAD/FMN-containing dehydrogenase	bi	1	1077	fig|573.2207.peg.1077	100	FAD/FMN-containing dehydrogenase	bi	1	535	fig|573.2212.peg.535	100	FAD/FMN-containing dehydrogenase	bi	1	4436	fig|573.2215.peg.4436	100	FAD/FMN-containing dehydrogenase	bi	1	2942	fig|573.2241.peg.2942	98.52	FAD/FMN-containing dehydrogenase
1	552	272	fig|573.1888.peg.552	Hydroxymethylpyrimidine ABC transporter, transmembrane component	bi	1	1076	fig|573.2207.peg.1076	100	Hydroxymethylpyrimidine ABC transporter, transmembrane component	bi	1	536	fig|573.2212.peg.536	100	Hydroxymethylpyrimidine ABC transporter, transmembrane component	bi	1	4435	fig|573.2215.peg.4435	100	Hydroxymethylpyrimidine ABC transporter, transmembrane component	bi	1	2941	fig|573.2241.peg.2941	100	Hydroxymethylpyrimidine ABC transporter, transmembrane component
1	553	277	fig|573.1888.peg.553	ABC-type nitrate/sulfonate/bicarbonate transport system, ATPase component	bi	1	1075	fig|573.2207.peg.1075	100	ABC-type nitrate/sulfonate/bicarbonate transport system, ATPase component	bi	1	537	fig|573.2212.peg.537	100	ABC-type nitrate/sulfonate/bicarbonate transport system, ATPase component	bi	1	4434	fig|573.2215.peg.4434	100	ABC-type nitrate/sulfonate/bicarbonate transport system, ATPase component	bi	1	2940	fig|573.2241.peg.2940	100	ABC-type nitrate/sulfonate/bicarbonate transport system, ATPase component
1	554	328	fig|573.1888.peg.554	Hydroxymethylpyrimidine ABC transporter, substrate-binding component	bi	1	1074	fig|573.2207.peg.1074	99.69	Hydroxymethylpyrimidine ABC transporter, substrate-binding component	bi	1	538	fig|573.2212.peg.538	99.69	Hydroxymethylpyrimidine ABC transporter, substrate-binding component	bi	1	4433	fig|573.2215.peg.4433	99.69	Hydroxymethylpyrimidine ABC transporter, substrate-binding component	bi	1	2939	fig|573.2241.peg.2939	99.08	Hydroxymethylpyrimidine ABC transporter, substrate-binding component
1	555	294	fig|573.1888.peg.555	Creatinine amidohydrolase (EC 3.5.2.10)	bi	1	1073	fig|573.2207.peg.1073	100	Creatinine amidohydrolase (EC 3.5.2.10)	bi	1	539	fig|573.2212.peg.539	100	Creatinine amidohydrolase (EC 3.5.2.10)	bi	1	4432	fig|573.2215.peg.4432	100	Creatinine amidohydrolase (EC 3.5.2.10)	bi	1	2938	fig|573.2241.peg.2938	100	Creatinine amidohydrolase (EC 3.5.2.10)
1	556	160	fig|573.1888.peg.556	Bona fide RidA/YjgF/TdcF/RutC subgroup	bi	1	1072	fig|573.2207.peg.1072	100	Bona fide RidA/YjgF/TdcF/RutC subgroup	bi	1	540	fig|573.2212.peg.540	100	Bona fide RidA/YjgF/TdcF/RutC subgroup	bi	1	4431	fig|573.2215.peg.4431	100	Bona fide RidA/YjgF/TdcF/RutC subgroup	bi	1	2937	fig|573.2241.peg.2937	99.37	Bona fide RidA/YjgF/TdcF/RutC subgroup
1	557	428	fig|573.1888.peg.557	Cytosine deaminase (EC 3.5.4.1)	bi	1	1071	fig|573.2207.peg.1071	100	Cytosine deaminase (EC 3.5.4.1)	bi	1	541	fig|573.2212.peg.541	100	Cytosine deaminase (EC 3.5.4.1)	bi	1	4430	fig|573.2215.peg.4430	100	Cytosine deaminase (EC 3.5.4.1)	bi	1	2936	fig|573.2241.peg.2936	98.13	Cytosine deaminase (EC 3.5.4.1)
1	558	323	fig|573.1888.peg.558	Flavodoxin reductases (ferredoxin-NADPH reductases) family 1; Vanillate O-demethylase oxidoreductase (EC 1.14.13.-)	bi	1	1070	fig|573.2207.peg.1070	100	Flavodoxin reductases (ferredoxin-NADPH reductases) family 1; Vanillate O-demethylase oxidoreductase (EC 1.14.13.-)	bi	1	542	fig|573.2212.peg.542	100	Flavodoxin reductases (ferredoxin-NADPH reductases) family 1; Vanillate O-demethylase oxidoreductase (EC 1.14.13.-)	bi	1	4429	fig|573.2215.peg.4429	99.66	Flavodoxin reductases (ferredoxin-NADPH reductases) family 1; Vanillate O-demethylase oxidoreductase (EC 1.14.13.-)	bi	1	2935	fig|573.2241.peg.2935	91.61	Flavodoxin reductases (ferredoxin-NADPH reductases) family 1; Vanillate O-demethylase oxidoreductase (EC 1.14.13.-)
1	559	300	fig|573.1888.peg.559	FIG00732545: hypothetical protein	bi	1	1069	fig|573.2207.peg.1069	100	FIG00732545: hypothetical protein	bi	1	543	fig|573.2212.peg.543	100	FIG00732545: hypothetical protein	bi	1	4428	fig|573.2215.peg.4428	100	FIG00732545: hypothetical protein	bi	1	2934	fig|573.2241.peg.2934	100	FIG00732545: hypothetical protein
1	560	330	fig|573.1888.peg.560	Hydroxymethylpyrimidine ABC transporter, substrate-binding component	bi	1	1068	fig|573.2207.peg.1068	100	Hydroxymethylpyrimidine ABC transporter, substrate-binding component	bi	1	544	fig|573.2212.peg.544	100	Hydroxymethylpyrimidine ABC transporter, substrate-binding component	bi	1	4427	fig|573.2215.peg.4427	100	Hydroxymethylpyrimidine ABC transporter, substrate-binding component	bi	1	2933	fig|573.2241.peg.2933	99.7	Hydroxymethylpyrimidine ABC transporter, substrate-binding component
1	561	473	fig|573.1888.peg.561	BOX elements	bi	1	1067	fig|573.2207.peg.1067	100	BOX elements	bi	1	545	fig|573.2212.peg.545	100	BOX elements	bi	1	4426	fig|573.2215.peg.4426	100	BOX elements	bi	1	2932	fig|573.2241.peg.2932	98.52	BOX elements
1	562	330	fig|573.1888.peg.562	Oxidoreductase	bi	1	1066	fig|573.2207.peg.1066	100	Oxidoreductase	bi	1	546	fig|573.2212.peg.546	100	Oxidoreductase	bi	1	4425	fig|573.2215.peg.4425	100	Oxidoreductase	bi	1	2931	fig|573.2241.peg.2931	98.48	Oxidoreductase
1	563	467	fig|573.1888.peg.563	diguanylate cyclase/phosphodiesterase (GGDEF & EAL domains) with PAS/PAC sensor(s)	bi	1	1065	fig|573.2207.peg.1065	100	diguanylate cyclase/phosphodiesterase (GGDEF & EAL domains) with PAS/PAC sensor(s)	bi	1	548	fig|573.2212.peg.548	100	diguanylate cyclase/phosphodiesterase (GGDEF & EAL domains) with PAS/PAC sensor(s)	bi	1	4423	fig|573.2215.peg.4423	100	diguanylate cyclase/phosphodiesterase (GGDEF & EAL domains) with PAS/PAC sensor(s)	uni	1	3365	fig|573.2241.peg.3365	32.38	FIG00731454: hypothetical protein
1	564	235	fig|573.1888.peg.564	Mobile element protein	bi	1	1062	fig|573.2207.peg.1062	100	Mobile element protein	-				0		-				0		bi	1	2166	fig|573.2241.peg.2166	100	Mobile element protein
1	565	292	fig|573.1888.peg.565	Beta-lactamase (EC 3.5.2.6)	bi	1	1063	fig|573.2207.peg.1063	100	Beta-lactamase (EC 3.5.2.6)	-				0		-				0		-				0
1	566	235	fig|573.1888.peg.566	Mobile element protein	uni	1	1062	fig|573.2207.peg.1062	100	Mobile element protein	-				0		-				0		uni	1	2166	fig|573.2241.peg.2166	100	Mobile element protein
1	567	52	fig|573.1888.peg.567	hypothetical protein	bi	1	1060	fig|573.2207.peg.1060	100	hypothetical protein	bi	1	558	fig|573.2212.peg.558	100	hypothetical protein	bi	1	4414	fig|573.2215.peg.4414	100	hypothetical protein	-				0
1	568	49	fig|573.1888.peg.568	hypothetical protein	bi	1	1059	fig|573.2207.peg.1059	100	hypothetical protein	bi	1	559	fig|573.2212.peg.559	100	hypothetical protein	bi	1	4413	fig|573.2215.peg.4413	100	hypothetical protein	-				0
1	569	100	fig|573.1888.peg.569	hypothetical protein	-				0		bi	1	561	fig|573.2212.peg.561	100	hypothetical protein	bi	1	4412	fig|573.2215.peg.4412	100	hypothetical protein	-				0
1	570	208	fig|573.1888.peg.570	Mobile element protein	bi	1	1058	fig|573.2207.peg.1058	100	Mobile element protein	bi	1	562	fig|573.2212.peg.562	100	Mobile element protein	bi	1	4411	fig|573.2215.peg.4411	100	Mobile element protein	-				0
1	571	159	fig|573.1888.peg.571	Mobile element protein	bi	1	1057	fig|573.2207.peg.1057	99.35	Mobile element protein	bi	1	563	fig|573.2212.peg.563	99.35	Mobile element protein	bi	1	4410	fig|573.2215.peg.4410	99.35	Mobile element protein	uni	1	3425	fig|573.2241.peg.3425	44.88	Mobile element protein
1	572	130	fig|573.1888.peg.572	Mobile element protein	bi	1	1056	fig|573.2207.peg.1056	100	Mobile element protein	bi	1	564	fig|573.2212.peg.564	100	Mobile element protein	bi	1	4409	fig|573.2215.peg.4409	100	Mobile element protein	uni	1	4469	fig|573.2241.peg.4469	89.47	Mobile element protein
1	573	314	fig|573.1888.peg.573	Tiorf34 protein	bi	1	1055	fig|573.2207.peg.1055	100	Tiorf34 protein	bi	1	565	fig|573.2212.peg.565	100	Tiorf34 protein	bi	1	4408	fig|573.2215.peg.4408	100	Tiorf34 protein	-				0
1	574	47	fig|573.1888.peg.574	hypothetical protein	bi	1	1054	fig|573.2207.peg.1054	100	hypothetical protein	bi	1	566	fig|573.2212.peg.566	100	hypothetical protein	uni	1	3939	fig|573.2215.peg.3939	54.76	Gifsy-2 prophage protein	uni	1	2459	fig|573.2241.peg.2459	57.14	Gifsy-2 prophage protein
1	575	412	fig|573.1888.peg.575	alpha-ketoglutarate permease	bi	1	1053	fig|573.2207.peg.1053	100	alpha-ketoglutarate permease	bi	1	567	fig|573.2212.peg.567	100	alpha-ketoglutarate permease	bi	1	4406	fig|573.2215.peg.4406	100	alpha-ketoglutarate permease	uni	1	3491	fig|573.2241.peg.3491	36.34	Ribitol/Xylitol/Arabitol transporter, MFS superfamily
1	576	364	fig|573.1888.peg.576	Unknown pentose isomerase ECA1953	bi	1	1052	fig|573.2207.peg.1052	100	Unknown pentose isomerase ECA1953	bi	1	568	fig|573.2212.peg.568	100	Unknown pentose isomerase ECA1953	bi	1	4405	fig|573.2215.peg.4405	100	Unknown pentose isomerase ECA1953	-				0
1	577	294	fig|573.1888.peg.577	Protein rpiR	bi	1	1051	fig|573.2207.peg.1051	100	Protein rpiR	bi	1	569	fig|573.2212.peg.569	100	Protein rpiR	bi	1	4404	fig|573.2215.peg.4404	100	Protein rpiR	uni	1	3877	fig|573.2241.peg.3877	26.59	Sialic acid utilization regulator, RpiR family
1	578	309	fig|573.1888.peg.578	Ribokinase (EC 2.7.1.15)	bi	1	1050	fig|573.2207.peg.1050	100	Ribokinase (EC 2.7.1.15)	bi	1	570	fig|573.2212.peg.570	100	Ribokinase (EC 2.7.1.15)	bi	1	4403	fig|573.2215.peg.4403	100	Ribokinase (EC 2.7.1.15)	uni	1	2583	fig|573.2241.peg.2583	34.23	Ribokinase (EC 2.7.1.15)
1	579	308	fig|573.1888.peg.579	Transcriptional regulator, LysR family	bi	1	1049	fig|573.2207.peg.1049	100	Transcriptional regulator, LysR family	bi	1	571	fig|573.2212.peg.571	100	Transcriptional regulator, LysR family	bi	1	4402	fig|573.2215.peg.4402	100	Transcriptional regulator, LysR family	bi	1	2927	fig|573.2241.peg.2927	97.28	Transcriptional regulator, LysR family
1	580	511	fig|573.1888.peg.580	Permeases of the major facilitator superfamily	bi	1	1048	fig|573.2207.peg.1048	100	Permeases of the major facilitator superfamily	bi	1	572	fig|573.2212.peg.572	100	Permeases of the major facilitator superfamily	bi	1	4401	fig|573.2215.peg.4401	100	Permeases of the major facilitator superfamily	bi	1	2926	fig|573.2241.peg.2926	99.02	Permeases of the major facilitator superfamily
1	581	95	fig|573.1888.peg.581	regulatory protein, LuxR	bi	1	1047	fig|573.2207.peg.1047	100	regulatory protein, LuxR	bi	1	573	fig|573.2212.peg.573	100	regulatory protein, LuxR	bi	1	4400	fig|573.2215.peg.4400	100	regulatory protein, LuxR	bi	1	2925	fig|573.2241.peg.2925	100	regulatory protein, LuxR
1	582	163	fig|573.1888.peg.582	FIG00732114: hypothetical protein	bi	1	1046	fig|573.2207.peg.1046	100	FIG00732114: hypothetical protein	bi	1	574	fig|573.2212.peg.574	100	FIG00732114: hypothetical protein	bi	1	4399	fig|573.2215.peg.4399	100	FIG00732114: hypothetical protein	bi	1	2924	fig|573.2241.peg.2924	97.53	FIG00732114: hypothetical protein
1	583	176	fig|573.1888.peg.583	Putative inner membrane protein	bi	1	1045	fig|573.2207.peg.1045	100	Putative inner membrane protein	bi	1	575	fig|573.2212.peg.575	100	Putative inner membrane protein	bi	1	4398	fig|573.2215.peg.4398	100	Putative inner membrane protein	bi	1	2923	fig|573.2241.peg.2923	100	Putative inner membrane protein
1	584	628	fig|573.1888.peg.584	Oligopeptide transport ATP-binding protein OppF (TC 3.A.1.5.1)	bi	1	1044	fig|573.2207.peg.1044	100	Oligopeptide transport ATP-binding protein OppF (TC 3.A.1.5.1)	bi	1	576	fig|573.2212.peg.576	100	Oligopeptide transport ATP-binding protein OppF (TC 3.A.1.5.1)	bi	1	4397	fig|573.2215.peg.4397	100	Oligopeptide transport ATP-binding protein OppF (TC 3.A.1.5.1)	bi	1	2922	fig|573.2241.peg.2922	98.57	Oligopeptide transport ATP-binding protein OppF (TC 3.A.1.5.1)
1	585	317	fig|573.1888.peg.585	Oligopeptide transport system permease protein OppC (TC 3.A.1.5.1)	bi	1	1042	fig|573.2207.peg.1042	100	Oligopeptide transport system permease protein OppC (TC 3.A.1.5.1)	bi	1	578	fig|573.2212.peg.578	100	Oligopeptide transport system permease protein OppC (TC 3.A.1.5.1)	bi	1	4395	fig|573.2215.peg.4395	100	Oligopeptide transport system permease protein OppC (TC 3.A.1.5.1)	bi	1	2921	fig|573.2241.peg.2921	98.73	Oligopeptide transport system permease protein OppC (TC 3.A.1.5.1)
1	586	320	fig|573.1888.peg.586	Oligopeptide transport system permease protein OppB (TC 3.A.1.5.1)	bi	1	1041	fig|573.2207.peg.1041	100	Oligopeptide transport system permease protein OppB (TC 3.A.1.5.1)	bi	1	579	fig|573.2212.peg.579	100	Oligopeptide transport system permease protein OppB (TC 3.A.1.5.1)	bi	1	4394	fig|573.2215.peg.4394	100	Oligopeptide transport system permease protein OppB (TC 3.A.1.5.1)	bi	1	2920	fig|573.2241.peg.2920	100	Oligopeptide transport system permease protein OppB (TC 3.A.1.5.1)
1	587	568	fig|573.1888.peg.587	Oligopeptide ABC transporter, periplasmic oligopeptide-binding protein OppA (TC 3.A.1.5.1)	bi	1	1040	fig|573.2207.peg.1040	100	Oligopeptide ABC transporter, periplasmic oligopeptide-binding protein OppA (TC 3.A.1.5.1)	bi	1	580	fig|573.2212.peg.580	100	Oligopeptide ABC transporter, periplasmic oligopeptide-binding protein OppA (TC 3.A.1.5.1)	bi	1	4393	fig|573.2215.peg.4393	100	Oligopeptide ABC transporter, periplasmic oligopeptide-binding protein OppA (TC 3.A.1.5.1)	bi	1	2919	fig|573.2241.peg.2919	99.47	Oligopeptide ABC transporter, periplasmic oligopeptide-binding protein OppA (TC 3.A.1.5.1)
1	588	228	fig|573.1888.peg.588	Chloramphenicol acetyltransferase (EC 2.3.1.28)	bi	1	1039	fig|573.2207.peg.1039	100	Chloramphenicol acetyltransferase (EC 2.3.1.28)	bi	1	581	fig|573.2212.peg.581	100	Chloramphenicol acetyltransferase (EC 2.3.1.28)	bi	1	4392	fig|573.2215.peg.4392	100	Chloramphenicol acetyltransferase (EC 2.3.1.28)	bi	1	2918	fig|573.2241.peg.2918	100	Chloramphenicol acetyltransferase (EC 2.3.1.28)
1	589	128	fig|573.1888.peg.589	Possible glyoxylase family protein (Lactoylglutathione lyase) (EC 4.4.1.5)	bi	1	1038	fig|573.2207.peg.1038	100	Possible glyoxylase family protein (Lactoylglutathione lyase) (EC 4.4.1.5)	bi	1	582	fig|573.2212.peg.582	100	Possible glyoxylase family protein (Lactoylglutathione lyase) (EC 4.4.1.5)	bi	1	4391	fig|573.2215.peg.4391	100	Possible glyoxylase family protein (Lactoylglutathione lyase) (EC 4.4.1.5)	bi	1	2917	fig|573.2241.peg.2917	100	Possible glyoxylase family protein (Lactoylglutathione lyase) (EC 4.4.1.5)
1	590	257	fig|573.1888.peg.590	Transcriptional regulators of sugar metabolism	bi	1	1037	fig|573.2207.peg.1037	100	Transcriptional regulators of sugar metabolism	bi	1	583	fig|573.2212.peg.583	100	Transcriptional regulators of sugar metabolism	bi	1	4390	fig|573.2215.peg.4390	100	Transcriptional regulators of sugar metabolism	bi	1	2916	fig|573.2241.peg.2916	99.61	Transcriptional regulators of sugar metabolism
1	591	210	fig|573.1888.peg.591	Threonine efflux protein	bi	1	1036	fig|573.2207.peg.1036	100	Threonine efflux protein	bi	1	584	fig|573.2212.peg.584	100	Threonine efflux protein	bi	1	4389	fig|573.2215.peg.4389	100	Threonine efflux protein	bi	1	2915	fig|573.2241.peg.2915	100	Threonine efflux protein
1	592	212	fig|573.1888.peg.592	Carbonic anhydrase (EC 4.2.1.1)	bi	1	1035	fig|573.2207.peg.1035	100	Carbonic anhydrase (EC 4.2.1.1)	bi	1	585	fig|573.2212.peg.585	100	Carbonic anhydrase (EC 4.2.1.1)	bi	1	4388	fig|573.2215.peg.4388	100	Carbonic anhydrase (EC 4.2.1.1)	bi	1	2914	fig|573.2241.peg.2914	100	Carbonic anhydrase (EC 4.2.1.1)
1	593	99	fig|573.1888.peg.593	FIG00731358: hypothetical protein	bi	1	1034	fig|573.2207.peg.1034	96.92	FIG00731358: hypothetical protein	bi	1	586	fig|573.2212.peg.586	96.92	FIG00731358: hypothetical protein	bi	1	4387	fig|573.2215.peg.4387	96.92	FIG00731358: hypothetical protein	bi	1	2912	fig|573.2241.peg.2912	98.46	FIG00731358: hypothetical protein
1	594	233	fig|573.1888.peg.594	FIG00732222: hypothetical protein	bi	1	1033	fig|573.2207.peg.1033	100	FIG00732222: hypothetical protein	bi	1	587	fig|573.2212.peg.587	100	FIG00732222: hypothetical protein	bi	1	4386	fig|573.2215.peg.4386	100	FIG00732222: hypothetical protein	bi	1	2911	fig|573.2241.peg.2911	99.14	FIG00732222: hypothetical protein
1	595	145	fig|573.1888.peg.595	FIG00732443: hypothetical protein	bi	1	1032	fig|573.2207.peg.1032	100	FIG00732443: hypothetical protein	bi	1	588	fig|573.2212.peg.588	100	FIG00732443: hypothetical protein	bi	1	4385	fig|573.2215.peg.4385	100	FIG00732443: hypothetical protein	bi	1	2910	fig|573.2241.peg.2910	100	FIG00732443: hypothetical protein
1	596	279	fig|573.1888.peg.596	FIG00732062: hypothetical protein	bi	1	1031	fig|573.2207.peg.1031	100	FIG00732062: hypothetical protein	bi	1	590	fig|573.2212.peg.590	100	FIG00732062: hypothetical protein	bi	1	4384	fig|573.2215.peg.4384	100	FIG00732062: hypothetical protein	bi	1	2908	fig|573.2241.peg.2908	100	FIG00732062: hypothetical protein
1	597	172	fig|573.1888.peg.597	Ribosomal protein S4 and related proteins	bi	1	1030	fig|573.2207.peg.1030	100	Ribosomal protein S4 and related proteins	bi	1	591	fig|573.2212.peg.591	100	Ribosomal protein S4 and related proteins	bi	1	4383	fig|573.2215.peg.4383	100	Ribosomal protein S4 and related proteins	bi	1	2907	fig|573.2241.peg.2907	99.42	Ribosomal protein S4 and related proteins
1	598	295	fig|573.1888.peg.598	Glycine cleavage system transcriptional activator	bi	1	1029	fig|573.2207.peg.1029	100	Glycine cleavage system transcriptional activator	bi	1	592	fig|573.2212.peg.592	99.66	Glycine cleavage system transcriptional activator	bi	1	4382	fig|573.2215.peg.4382	99.66	Glycine cleavage system transcriptional activator	bi	1	2906	fig|573.2241.peg.2906	99.66	Glycine cleavage system transcriptional activator
1	599	309	fig|573.1888.peg.599	transcriptional regulator, AraC family	bi	1	1028	fig|573.2207.peg.1028	100	transcriptional regulator, AraC family	bi	1	593	fig|573.2212.peg.593	100	transcriptional regulator, AraC family	bi	1	4381	fig|573.2215.peg.4381	100	transcriptional regulator, AraC family	uni	1	2539	fig|573.2241.peg.2539	37.01	Transcriptional regulator, AraC family
1	600	251	fig|573.1888.peg.600	Short-chain dehydrogenase/reductase SDR	bi	1	1027	fig|573.2207.peg.1027	100	Short-chain dehydrogenase/reductase SDR	bi	1	594	fig|573.2212.peg.594	100	Short-chain dehydrogenase/reductase SDR	bi	1	4380	fig|573.2215.peg.4380	100	Short-chain dehydrogenase/reductase SDR	uni	1	2456	fig|573.2241.peg.2456	35.22	3-hydroxypropionate dehydrogenase (EC 1.1.1.298)
1	601	193	fig|573.1888.peg.601	Lysine decarboxylase family	bi	1	1026	fig|573.2207.peg.1026	100	Lysine decarboxylase family	bi	1	596	fig|573.2212.peg.596	100	Lysine decarboxylase family	bi	1	4379	fig|573.2215.peg.4379	100	Lysine decarboxylase family	bi	1	2903	fig|573.2241.peg.2903	98.44	Lysine decarboxylase family
1	602	79	fig|573.1888.peg.602	Acid shock protein precursor	bi	1	1025	fig|573.2207.peg.1025	100	Acid shock protein precursor	bi	1	597	fig|573.2212.peg.597	100	Acid shock protein precursor	bi	1	4378	fig|573.2215.peg.4378	100	Acid shock protein precursor	bi	1	2902	fig|573.2241.peg.2902	100	Acid shock protein precursor
1	603	458	fig|573.1888.peg.603	Multidrug and toxin extrusion (MATE) family efflux pump YdhE/NorM	bi	1	1024	fig|573.2207.peg.1024	100	Multidrug and toxin extrusion (MATE) family efflux pump YdhE/NorM	bi	1	598	fig|573.2212.peg.598	100	Multidrug and toxin extrusion (MATE) family efflux pump YdhE/NorM	bi	1	4377	fig|573.2215.peg.4377	100	Multidrug and toxin extrusion (MATE) family efflux pump YdhE/NorM	bi	1	2901	fig|573.2241.peg.2901	99.56	Multidrug and toxin extrusion (MATE) family efflux pump YdhE/NorM
1	604	212	fig|573.1888.peg.604	Riboflavin synthase eubacterial/eukaryotic (EC 2.5.1.9)	bi	1	1023	fig|573.2207.peg.1023	100	Riboflavin synthase eubacterial/eukaryotic (EC 2.5.1.9)	bi	1	599	fig|573.2212.peg.599	100	Riboflavin synthase eubacterial/eukaryotic (EC 2.5.1.9)	bi	1	4376	fig|573.2215.peg.4376	100	Riboflavin synthase eubacterial/eukaryotic (EC 2.5.1.9)	bi	1	2900	fig|573.2241.peg.2900	99.05	Riboflavin synthase eubacterial/eukaryotic (EC 2.5.1.9)
1	605	383	fig|573.1888.peg.605	Cyclopropane-fatty-acyl-phospholipid synthase (EC 2.1.1.79)	bi	1	1022	fig|573.2207.peg.1022	100	Cyclopropane-fatty-acyl-phospholipid synthase (EC 2.1.1.79)	bi	1	600	fig|573.2212.peg.600	100	Cyclopropane-fatty-acyl-phospholipid synthase (EC 2.1.1.79)	bi	1	4375	fig|573.2215.peg.4375	100	Cyclopropane-fatty-acyl-phospholipid synthase (EC 2.1.1.79)	bi	1	2899	fig|573.2241.peg.2899	100	Cyclopropane-fatty-acyl-phospholipid synthase (EC 2.1.1.79)
1	606	394	fig|573.1888.peg.606	Putative transport protein	bi	1	1021	fig|573.2207.peg.1021	100	Putative transport protein	bi	1	601	fig|573.2212.peg.601	100	Putative transport protein	bi	1	4374	fig|573.2215.peg.4374	100	Putative transport protein	bi	1	2898	fig|573.2241.peg.2898	99.75	Putative transport protein
1	607	342	fig|573.1888.peg.607	Purine nucleotide synthesis repressor	bi	1	1020	fig|573.2207.peg.1020	100	Purine nucleotide synthesis repressor	bi	1	602	fig|573.2212.peg.602	100	Purine nucleotide synthesis repressor	bi	1	4373	fig|573.2215.peg.4373	100	Purine nucleotide synthesis repressor	bi	1	2897	fig|573.2241.peg.2897	100	Purine nucleotide synthesis repressor
1	608	389	fig|573.1888.peg.608	Putative transport protein	bi	1	1019	fig|573.2207.peg.1019	100	Putative transport protein	bi	1	603	fig|573.2212.peg.603	100	Putative transport protein	bi	1	4372	fig|573.2215.peg.4372	100	Putative transport protein	bi	1	2896	fig|573.2241.peg.2896	100	Putative transport protein
1	609	194	fig|573.1888.peg.609	Superoxide dismutase [Fe] (EC 1.15.1.1)	bi	1	1018	fig|573.2207.peg.1018	100	Superoxide dismutase [Fe] (EC 1.15.1.1)	bi	1	604	fig|573.2212.peg.604	100	Superoxide dismutase [Fe] (EC 1.15.1.1)	bi	1	4371	fig|573.2215.peg.4371	100	Superoxide dismutase [Fe] (EC 1.15.1.1)	bi	1	2895	fig|573.2241.peg.2895	100	Superoxide dismutase [Fe] (EC 1.15.1.1)
1	610	162	fig|573.1888.peg.610	Regulatory protein soxS	bi	1	1017	fig|573.2207.peg.1017	100	Regulatory protein soxS	bi	1	605	fig|573.2212.peg.605	100	Regulatory protein soxS	bi	1	4370	fig|573.2215.peg.4370	100	Regulatory protein soxS	bi	1	2894	fig|573.2241.peg.2894	98.76	Regulatory protein soxS
1	611	291	fig|573.1888.peg.611	FIG00545237: hypothetical protein	bi	1	1016	fig|573.2207.peg.1016	100	FIG00545237: hypothetical protein	bi	1	606	fig|573.2212.peg.606	100	FIG00545237: hypothetical protein	bi	1	4369	fig|573.2215.peg.4369	100	FIG00545237: hypothetical protein	bi	1	2893	fig|573.2241.peg.2893	99.48	FIG00545237: hypothetical protein
1	612	116	fig|573.1888.peg.612	Probable monothiol glutaredoxin GrlA	bi	1	1015	fig|573.2207.peg.1015	100	Probable monothiol glutaredoxin GrlA	bi	1	607	fig|573.2212.peg.607	100	Probable monothiol glutaredoxin GrlA	bi	1	4368	fig|573.2215.peg.4368	100	Probable monothiol glutaredoxin GrlA	bi	1	2892	fig|573.2241.peg.2892	100	Probable monothiol glutaredoxin GrlA
1	613	216	fig|573.1888.peg.613	Ribonuclease T (EC 3.1.13.-)	bi	1	1014	fig|573.2207.peg.1014	100	Ribonuclease T (EC 3.1.13.-)	bi	1	608	fig|573.2212.peg.608	100	Ribonuclease T (EC 3.1.13.-)	bi	1	4367	fig|573.2215.peg.4367	100	Ribonuclease T (EC 3.1.13.-)	bi	1	2891	fig|573.2241.peg.2891	100	Ribonuclease T (EC 3.1.13.-)
1	614	136	fig|573.1888.peg.614	Lactoylglutathione lyase (EC 4.4.1.5)	bi	1	1013	fig|573.2207.peg.1013	100	Lactoylglutathione lyase (EC 4.4.1.5)	bi	1	609	fig|573.2212.peg.609	100	Lactoylglutathione lyase (EC 4.4.1.5)	bi	1	4366	fig|573.2215.peg.4366	100	Lactoylglutathione lyase (EC 4.4.1.5)	bi	1	2890	fig|573.2241.peg.2890	100	Lactoylglutathione lyase (EC 4.4.1.5)
1	615	366	fig|573.1888.peg.615	N-ethylmaleimide reductase (EC 1.-.-.-)	bi	1	1012	fig|573.2207.peg.1012	100	N-ethylmaleimide reductase (EC 1.-.-.-)	bi	1	610	fig|573.2212.peg.610	100	N-ethylmaleimide reductase (EC 1.-.-.-)	bi	1	4365	fig|573.2215.peg.4365	100	N-ethylmaleimide reductase (EC 1.-.-.-)	bi	1	2889	fig|573.2241.peg.2889	100	N-ethylmaleimide reductase (EC 1.-.-.-)
1	616	200	fig|573.1888.peg.616	Transcriptional regulator, TetR family	bi	1	1011	fig|573.2207.peg.1011	100	Transcriptional regulator, TetR family	bi	1	611	fig|573.2212.peg.611	100	Transcriptional regulator, TetR family	bi	1	4364	fig|573.2215.peg.4364	100	Transcriptional regulator, TetR family	bi	1	2888	fig|573.2241.peg.2888	100	Transcriptional regulator, TetR family
1	617	81	fig|573.1888.peg.617	FIG00553873: hypothetical protein	bi	1	1010	fig|573.2207.peg.1010	100	FIG00553873: hypothetical protein	bi	1	612	fig|573.2212.peg.612	100	FIG00553873: hypothetical protein	bi	1	4363	fig|573.2215.peg.4363	100	FIG00553873: hypothetical protein	bi	1	2887	fig|573.2241.peg.2887	100	FIG00553873: hypothetical protein
1	618	299	fig|573.1888.peg.618	Putative aldo/keto reductase	bi	1	1009	fig|573.2207.peg.1009	100	Putative aldo/keto reductase	bi	1	613	fig|573.2212.peg.613	100	Putative aldo/keto reductase	bi	1	4362	fig|573.2215.peg.4362	100	Putative aldo/keto reductase	bi	1	2886	fig|573.2241.peg.2886	99.66	Putative aldo/keto reductase
1	619	146	fig|573.1888.peg.619	Superoxide dismutase [Cu-Zn] precursor (EC 1.15.1.1)	bi	1	1008	fig|573.2207.peg.1008	100	Superoxide dismutase [Cu-Zn] precursor (EC 1.15.1.1)	bi	1	614	fig|573.2212.peg.614	100	Superoxide dismutase [Cu-Zn] precursor (EC 1.15.1.1)	bi	1	4361	fig|573.2215.peg.4361	100	Superoxide dismutase [Cu-Zn] precursor (EC 1.15.1.1)	bi	1	2885	fig|573.2241.peg.2885	99.31	Superoxide dismutase [Cu-Zn] precursor (EC 1.15.1.1)
1	620	675	fig|573.1888.peg.620	FIG00731661: hypothetical protein	bi	1	1007	fig|573.2207.peg.1007	100	FIG00731661: hypothetical protein	bi	1	615	fig|573.2212.peg.615	100	FIG00731661: hypothetical protein	bi	1	4359	fig|573.2215.peg.4359	100	FIG00731661: hypothetical protein	bi	1	2884	fig|573.2241.peg.2884	99.85	FIG00731661: hypothetical protein
1	621	299	fig|573.1888.peg.621	Putative membrane protein	bi	1	1006	fig|573.2207.peg.1006	100	Putative membrane protein	bi	1	616	fig|573.2212.peg.616	99.66	Putative membrane protein	bi	1	4358	fig|573.2215.peg.4358	99.66	Putative membrane protein	bi	1	2883	fig|573.2241.peg.2883	99.66	Putative membrane protein
1	622	79	fig|573.1888.peg.622	FIG00638170: hypothetical protein	bi	1	1005	fig|573.2207.peg.1005	100	FIG00638170: hypothetical protein	bi	1	617	fig|573.2212.peg.617	100	FIG00638170: hypothetical protein	bi	1	4357	fig|573.2215.peg.4357	100	FIG00638170: hypothetical protein	bi	1	2882	fig|573.2241.peg.2882	100	FIG00638170: hypothetical protein
1	623	145	fig|573.1888.peg.623	Transcriptional regulator SlyA	bi	1	1004	fig|573.2207.peg.1004	100	Transcriptional regulator SlyA	bi	1	618	fig|573.2212.peg.618	100	Transcriptional regulator SlyA	bi	1	4356	fig|573.2215.peg.4356	100	Transcriptional regulator SlyA	bi	1	2881	fig|573.2241.peg.2881	100	Transcriptional regulator SlyA
1	624	436	fig|573.1888.peg.624	FIG00731518: hypothetical protein	bi	1	1003	fig|573.2207.peg.1003	100	FIG00731518: hypothetical protein	bi	1	619	fig|573.2212.peg.619	100	FIG00731518: hypothetical protein	bi	1	4355	fig|573.2215.peg.4355	99.76	FIG00731518: hypothetical protein	bi	1	2880	fig|573.2241.peg.2880	99.76	FIG00731518: hypothetical protein
1	625	156	fig|573.1888.peg.625	Outer membrane lipoprotein pcp precursor	bi	1	1002	fig|573.2207.peg.1002	100	Outer membrane lipoprotein pcp precursor	bi	1	620	fig|573.2212.peg.620	100	Outer membrane lipoprotein pcp precursor	bi	1	4354	fig|573.2215.peg.4354	100	Outer membrane lipoprotein pcp precursor	bi	1	2879	fig|573.2241.peg.2879	100	Outer membrane lipoprotein pcp precursor
1	626	375	fig|573.1888.peg.626	Anhydro-N-acetylmuramic acid kinase (EC 2.7.1.-)	bi	1	1001	fig|573.2207.peg.1001	100	Anhydro-N-acetylmuramic acid kinase (EC 2.7.1.-)	bi	1	621	fig|573.2212.peg.621	100	Anhydro-N-acetylmuramic acid kinase (EC 2.7.1.-)	bi	1	4353	fig|573.2215.peg.4353	100	Anhydro-N-acetylmuramic acid kinase (EC 2.7.1.-)	bi	1	2878	fig|573.2241.peg.2878	100	Anhydro-N-acetylmuramic acid kinase (EC 2.7.1.-)
1	627	117	fig|573.1888.peg.627	Membrane-bound lysozyme inhibitor of c-type lysozyme	bi	1	1000	fig|573.2207.peg.1000	100	Membrane-bound lysozyme inhibitor of c-type lysozyme	bi	1	622	fig|573.2212.peg.622	100	Membrane-bound lysozyme inhibitor of c-type lysozyme	bi	1	4352	fig|573.2215.peg.4352	100	Membrane-bound lysozyme inhibitor of c-type lysozyme	bi	1	2877	fig|573.2241.peg.2877	100	Membrane-bound lysozyme inhibitor of c-type lysozyme
1	628	221	fig|573.1888.peg.628	Pyridoxamine 5'-phosphate oxidase (EC 1.4.3.5)	bi	1	999	fig|573.2207.peg.999	100	Pyridoxamine 5'-phosphate oxidase (EC 1.4.3.5)	bi	1	623	fig|573.2212.peg.623	100	Pyridoxamine 5'-phosphate oxidase (EC 1.4.3.5)	bi	1	4351	fig|573.2215.peg.4351	100	Pyridoxamine 5'-phosphate oxidase (EC 1.4.3.5)	bi	1	2876	fig|573.2241.peg.2876	99.55	Pyridoxamine 5'-phosphate oxidase (EC 1.4.3.5)
1	629	425	fig|573.1888.peg.629	Tyrosyl-tRNA synthetase (EC 6.1.1.1)	bi	1	998	fig|573.2207.peg.998	100	Tyrosyl-tRNA synthetase (EC 6.1.1.1)	bi	1	624	fig|573.2212.peg.624	100	Tyrosyl-tRNA synthetase (EC 6.1.1.1)	bi	1	4350	fig|573.2215.peg.4350	100	Tyrosyl-tRNA synthetase (EC 6.1.1.1)	bi	1	2875	fig|573.2241.peg.2875	100	Tyrosyl-tRNA synthetase (EC 6.1.1.1)
1	630	287	fig|573.1888.peg.630	Pyridoxal kinase (EC 2.7.1.35)	bi	1	997	fig|573.2207.peg.997	100	Pyridoxal kinase (EC 2.7.1.35)	bi	1	625	fig|573.2212.peg.625	100	Pyridoxal kinase (EC 2.7.1.35)	bi	1	4349	fig|573.2215.peg.4349	100	Pyridoxal kinase (EC 2.7.1.35)	bi	1	2874	fig|573.2241.peg.2874	100	Pyridoxal kinase (EC 2.7.1.35)
1	631	202	fig|573.1888.peg.631	Glutathione S-transferase (EC 2.5.1.18)	bi	1	996	fig|573.2207.peg.996	100	Glutathione S-transferase (EC 2.5.1.18)	bi	1	626	fig|573.2212.peg.626	100	Glutathione S-transferase (EC 2.5.1.18)	bi	1	4348	fig|573.2215.peg.4348	100	Glutathione S-transferase (EC 2.5.1.18)	bi	1	2873	fig|573.2241.peg.2873	99	Glutathione S-transferase (EC 2.5.1.18)
1	632	459	fig|573.1888.peg.632	Di/tripeptide permease DtpA	bi	1	995	fig|573.2207.peg.995	100	Di/tripeptide permease DtpA	bi	1	627	fig|573.2212.peg.627	100	Di/tripeptide permease DtpA	bi	1	4347	fig|573.2215.peg.4347	100	Di/tripeptide permease DtpA	bi	1	2872	fig|573.2241.peg.2872	100	Di/tripeptide permease DtpA
1	633	76	fig|573.1888.peg.633	hypothetical protein	bi	1	994	fig|573.2207.peg.994	100	hypothetical protein	bi	1	628	fig|573.2212.peg.628	100	hypothetical protein	bi	1	4346	fig|573.2215.peg.4346	100	hypothetical protein	bi	1	2871	fig|573.2241.peg.2871	98.11	hypothetical protein
1	634	86	fig|573.1888.peg.634	hypothetical protein	-				0		bi	1	629	fig|573.2212.peg.629	100	hypothetical protein	bi	1	4345	fig|573.2215.peg.4345	100	hypothetical protein	bi	1	2870	fig|573.2241.peg.2870	96.47	hypothetical protein
1	635	212	fig|573.1888.peg.635	Endonuclease III (EC 4.2.99.18)	bi	1	993	fig|573.2207.peg.993	100	Endonuclease III (EC 4.2.99.18)	bi	1	630	fig|573.2212.peg.630	100	Endonuclease III (EC 4.2.99.18)	bi	1	4344	fig|573.2215.peg.4344	100	Endonuclease III (EC 4.2.99.18)	bi	1	2869	fig|573.2241.peg.2869	100	Endonuclease III (EC 4.2.99.18)
1	636	233	fig|573.1888.peg.636	Electron transport complex protein RnfE	bi	1	992	fig|573.2207.peg.992	100	Electron transport complex protein RnfE	bi	1	631	fig|573.2212.peg.631	100	Electron transport complex protein RnfE	bi	1	4343	fig|573.2215.peg.4343	100	Electron transport complex protein RnfE	bi	1	2868	fig|573.2241.peg.2868	99.57	Electron transport complex protein RnfE
1	637	208	fig|573.1888.peg.637	Electron transport complex protein RnfG	bi	1	991	fig|573.2207.peg.991	100	Electron transport complex protein RnfG	bi	1	632	fig|573.2212.peg.632	100	Electron transport complex protein RnfG	bi	1	4342	fig|573.2215.peg.4342	100	Electron transport complex protein RnfG	bi	1	2867	fig|573.2241.peg.2867	100	Electron transport complex protein RnfG
1	638	351	fig|573.1888.peg.638	Electron transport complex protein RnfD	bi	1	990	fig|573.2207.peg.990	100	Electron transport complex protein RnfD	bi	1	633	fig|573.2212.peg.633	100	Electron transport complex protein RnfD	bi	1	4341	fig|573.2215.peg.4341	100	Electron transport complex protein RnfD	bi	1	2866	fig|573.2241.peg.2866	99.71	Electron transport complex protein RnfD
1	639	754	fig|573.1888.peg.639	Electron transport complex protein RnfC	bi	1	989	fig|573.2207.peg.989	100	Electron transport complex protein RnfC	bi	1	634	fig|573.2212.peg.634	100	Electron transport complex protein RnfC	bi	1	4340	fig|573.2215.peg.4340	100	Electron transport complex protein RnfC	bi	1	2865	fig|573.2241.peg.2865	98.67	Electron transport complex protein RnfC
1	640	186	fig|573.1888.peg.640	Electron transport complex protein RnfB	bi	1	988	fig|573.2207.peg.988	100	Electron transport complex protein RnfB	bi	1	635	fig|573.2212.peg.635	100	Electron transport complex protein RnfB	bi	1	4339	fig|573.2215.peg.4339	100	Electron transport complex protein RnfB	bi	1	2864	fig|573.2241.peg.2864	100	Electron transport complex protein RnfB
1	641	194	fig|573.1888.peg.641	Electron transport complex protein RnfA	bi	1	987	fig|573.2207.peg.987	100	Electron transport complex protein RnfA	bi	1	636	fig|573.2212.peg.636	100	Electron transport complex protein RnfA	bi	1	4338	fig|573.2215.peg.4338	100	Electron transport complex protein RnfA	bi	1	2863	fig|573.2241.peg.2863	100	Electron transport complex protein RnfA
1	642	147	fig|573.1888.peg.642	Putative membrane protein precursor	bi	1	986	fig|573.2207.peg.986	100	Putative membrane protein precursor	bi	1	637	fig|573.2212.peg.637	100	Putative membrane protein precursor	bi	1	4337	fig|573.2215.peg.4337	100	Putative membrane protein precursor	bi	1	2862	fig|573.2241.peg.2862	100	Putative membrane protein precursor
1	643	90	fig|573.1888.peg.643	Cnu protein	bi	1	985	fig|573.2207.peg.985	100	Cnu protein	bi	1	638	fig|573.2212.peg.638	100	Cnu protein	bi	1	4336	fig|573.2215.peg.4336	100	Cnu protein	bi	1	2861	fig|573.2241.peg.2861	100	Cnu protein
1	644	457	fig|573.1888.peg.644	Beta-glucosidase (EC 3.2.1.21); 6-phospho-beta-glucosidase (EC 3.2.1.86)	bi	1	984	fig|573.2207.peg.984	100	Beta-glucosidase (EC 3.2.1.21); 6-phospho-beta-glucosidase (EC 3.2.1.86)	bi	1	639	fig|573.2212.peg.639	99.78	Beta-glucosidase (EC 3.2.1.21); 6-phospho-beta-glucosidase (EC 3.2.1.86)	uni	1	68	fig|573.2215.peg.68	38.76	6-phospho-beta-glucosidase (EC 3.2.1.86)	bi	1	2860	fig|573.2241.peg.2860	99.56	Beta-glucosidase (EC 3.2.1.21); 6-phospho-beta-glucosidase (EC 3.2.1.86)
1	645	347	fig|573.1888.peg.645	Uncharacterized oxidoreductase ydgJ (EC 1.-.-.-)	bi	1	983	fig|573.2207.peg.983	100	Uncharacterized oxidoreductase ydgJ (EC 1.-.-.-)	bi	1	640	fig|573.2212.peg.640	100	Uncharacterized oxidoreductase ydgJ (EC 1.-.-.-)	bi	1	4335	fig|573.2215.peg.4335	100	Uncharacterized oxidoreductase ydgJ (EC 1.-.-.-)	bi	1	2859	fig|573.2241.peg.2859	99.42	Uncharacterized oxidoreductase ydgJ (EC 1.-.-.-)
1	646	334	fig|573.1888.peg.646	Adenosine deaminase (EC 3.5.4.4)	bi	1	982	fig|573.2207.peg.982	100	Adenosine deaminase (EC 3.5.4.4)	bi	1	641	fig|573.2212.peg.641	100	Adenosine deaminase (EC 3.5.4.4)	bi	1	4334	fig|573.2215.peg.4334	100	Adenosine deaminase (EC 3.5.4.4)	bi	1	2858	fig|573.2241.peg.2858	100	Adenosine deaminase (EC 3.5.4.4)
1	647	385	fig|573.1888.peg.647	MFS permease protein	bi	1	981	fig|573.2207.peg.981	99.73	MFS permease protein	bi	1	642	fig|573.2212.peg.642	99.73	MFS permease protein	bi	1	4333	fig|573.2215.peg.4333	99.73	MFS permease protein	bi	1	2857	fig|573.2241.peg.2857	98.4	MFS permease protein
1	648	155	fig|573.1888.peg.648	Transcriptional regulator, HxlR family	bi	1	980	fig|573.2207.peg.980	100	Transcriptional regulator, HxlR family	bi	1	643	fig|573.2212.peg.643	100	Transcriptional regulator, HxlR family	bi	1	4332	fig|573.2215.peg.4332	100	Transcriptional regulator, HxlR family	bi	1	2856	fig|573.2241.peg.2856	100	Transcriptional regulator, HxlR family
1	649	62	fig|573.1888.peg.649	FIG00731900: hypothetical protein	bi	1	979	fig|573.2207.peg.979	100	FIG00731900: hypothetical protein	bi	1	644	fig|573.2212.peg.644	100	FIG00731900: hypothetical protein	bi	1	4331	fig|573.2215.peg.4331	100	FIG00731900: hypothetical protein	bi	1	2855	fig|573.2241.peg.2855	100	FIG00731900: hypothetical protein
1	650	121	fig|573.1888.peg.650	FIG00731566: hypothetical protein	bi	1	978	fig|573.2207.peg.978	100	FIG00731566: hypothetical protein	bi	1	645	fig|573.2212.peg.645	100	FIG00731566: hypothetical protein	bi	1	4330	fig|573.2215.peg.4330	100	FIG00731566: hypothetical protein	bi	1	2854	fig|573.2241.peg.2854	99.17	FIG00731566: hypothetical protein
1	651	176	fig|573.1888.peg.651	Cytochrome b(561)	bi	1	977	fig|573.2207.peg.977	100	Cytochrome b(561)	bi	1	646	fig|573.2212.peg.646	100	Cytochrome b(561)	bi	1	4329	fig|573.2215.peg.4329	100	Cytochrome b(561)	bi	1	2853	fig|573.2241.peg.2853	100	Cytochrome b(561)
1	652	92	fig|573.1888.peg.652	FrmR: Negative transcriptional regulator of formaldehyde detoxification operon	bi	1	976	fig|573.2207.peg.976	100	FrmR: Negative transcriptional regulator of formaldehyde detoxification operon	bi	1	647	fig|573.2212.peg.647	100	FrmR: Negative transcriptional regulator of formaldehyde detoxification operon	bi	1	4328	fig|573.2215.peg.4328	100	FrmR: Negative transcriptional regulator of formaldehyde detoxification operon	bi	1	2852	fig|573.2241.peg.2852	100	FrmR: Negative transcriptional regulator of formaldehyde detoxification operon
1	653	373	fig|573.1888.peg.653	S-(hydroxymethyl)glutathione dehydrogenase (EC 1.1.1.284)	bi	1	975	fig|573.2207.peg.975	100	S-(hydroxymethyl)glutathione dehydrogenase (EC 1.1.1.284)	bi	1	648	fig|573.2212.peg.648	100	S-(hydroxymethyl)glutathione dehydrogenase (EC 1.1.1.284)	bi	1	4327	fig|573.2215.peg.4327	99.73	S-(hydroxymethyl)glutathione dehydrogenase (EC 1.1.1.284)	bi	1	2851	fig|573.2241.peg.2851	99.46	S-(hydroxymethyl)glutathione dehydrogenase (EC 1.1.1.284)
1	654	791	fig|573.1888.peg.654	Quinate/shikimate dehydrogenase [Pyrroloquinoline-quinone] (EC 1.1.99.25)	bi	1	974	fig|573.2207.peg.974	100	Quinate/shikimate dehydrogenase [Pyrroloquinoline-quinone] (EC 1.1.99.25)	bi	1	649	fig|573.2212.peg.649	100	Quinate/shikimate dehydrogenase [Pyrroloquinoline-quinone] (EC 1.1.99.25)	bi	1	4326	fig|573.2215.peg.4326	99.87	Quinate/shikimate dehydrogenase [Pyrroloquinoline-quinone] (EC 1.1.99.25)	bi	1	2850	fig|573.2241.peg.2850	99.62	Quinate/shikimate dehydrogenase [Pyrroloquinoline-quinone] (EC 1.1.99.25)
1	655	38	fig|573.1888.peg.655	hypothetical protein	bi	1	973	fig|573.2207.peg.973	100	hypothetical protein	-				0		-				0		-				0
1	656	308	fig|573.1888.peg.656	LysR family transcriptional regulator YdcI	bi	1	972	fig|573.2207.peg.972	100	LysR family transcriptional regulator YdcI	bi	1	650	fig|573.2212.peg.650	100	LysR family transcriptional regulator YdcI	bi	1	4325	fig|573.2215.peg.4325	100	LysR family transcriptional regulator YdcI	bi	1	2849	fig|573.2241.peg.2849	100	LysR family transcriptional regulator YdcI
1	657	207	fig|573.1888.peg.657	Protocatechuate 3,4-dioxygenase alpha chain (EC 1.13.11.3)	bi	1	971	fig|573.2207.peg.971	100	Protocatechuate 3,4-dioxygenase alpha chain (EC 1.13.11.3)	bi	1	651	fig|573.2212.peg.651	100	Protocatechuate 3,4-dioxygenase alpha chain (EC 1.13.11.3)	bi	1	4324	fig|573.2215.peg.4324	100	Protocatechuate 3,4-dioxygenase alpha chain (EC 1.13.11.3)	bi	1	2848	fig|573.2241.peg.2848	99.03	Protocatechuate 3,4-dioxygenase alpha chain (EC 1.13.11.3)
1	658	247	fig|573.1888.peg.658	Protocatechuate 3,4-dioxygenase beta chain (EC 1.13.11.3)	bi	1	970	fig|573.2207.peg.970	100	Protocatechuate 3,4-dioxygenase beta chain (EC 1.13.11.3)	bi	1	652	fig|573.2212.peg.652	100	Protocatechuate 3,4-dioxygenase beta chain (EC 1.13.11.3)	bi	1	4323	fig|573.2215.peg.4323	100	Protocatechuate 3,4-dioxygenase beta chain (EC 1.13.11.3)	bi	1	2847	fig|573.2241.peg.2847	100	Protocatechuate 3,4-dioxygenase beta chain (EC 1.13.11.3)
1	659	448	fig|573.1888.peg.659	FIG074102: hypothetical protein	bi	1	969	fig|573.2207.peg.969	100	FIG074102: hypothetical protein	bi	1	653	fig|573.2212.peg.653	100	FIG074102: hypothetical protein	bi	1	4322	fig|573.2215.peg.4322	100	FIG074102: hypothetical protein	bi	1	2846	fig|573.2241.peg.2846	99.78	FIG074102: hypothetical protein
1	660	502	fig|573.1888.peg.660	Putative esterase	bi	1	968	fig|573.2207.peg.968	100	Putative esterase	bi	1	654	fig|573.2212.peg.654	100	Putative esterase	bi	1	4321	fig|573.2215.peg.4321	99.8	Putative esterase	bi	1	2845	fig|573.2241.peg.2845	99.4	Putative esterase
1	661	363	fig|573.1888.peg.661	benzyl alcohol dehydrogenase	bi	1	967	fig|573.2207.peg.967	100	benzyl alcohol dehydrogenase	bi	1	655	fig|573.2212.peg.655	100	benzyl alcohol dehydrogenase	bi	1	4320	fig|573.2215.peg.4320	99.17	benzyl alcohol dehydrogenase	bi	1	2844	fig|573.2241.peg.2844	98.34	benzyl alcohol dehydrogenase
1	662	552	fig|573.1888.peg.662	Glucans biosynthesis protein D precursor	bi	1	966	fig|573.2207.peg.966	100	Glucans biosynthesis protein D precursor	bi	1	656	fig|573.2212.peg.656	100	Glucans biosynthesis protein D precursor	bi	1	4319	fig|573.2215.peg.4319	99.82	Glucans biosynthesis protein D precursor	bi	1	2843	fig|573.2241.peg.2843	99.82	Glucans biosynthesis protein D precursor
1	663	193	fig|573.1888.peg.663	Ribosomal-protein-L7p-serine acetyltransferase	bi	1	965	fig|573.2207.peg.965	100	Ribosomal-protein-L7p-serine acetyltransferase	bi	1	657	fig|573.2212.peg.657	100	Ribosomal-protein-L7p-serine acetyltransferase	bi	1	4318	fig|573.2215.peg.4318	98.96	Ribosomal-protein-L7p-serine acetyltransferase	bi	1	2842	fig|573.2241.peg.2842	98.44	Ribosomal-protein-L7p-serine acetyltransferase
1	664	327	fig|573.1888.peg.664	FIG005189: putative transferase clustered with tellurite resistance proteins TehA/TehB	bi	1	964	fig|573.2207.peg.964	100	FIG005189: putative transferase clustered with tellurite resistance proteins TehA/TehB	bi	1	658	fig|573.2212.peg.658	100	FIG005189: putative transferase clustered with tellurite resistance proteins TehA/TehB	bi	1	4317	fig|573.2215.peg.4317	99.08	FIG005189: putative transferase clustered with tellurite resistance proteins TehA/TehB	bi	1	2841	fig|573.2241.peg.2841	98.77	FIG005189: putative transferase clustered with tellurite resistance proteins TehA/TehB
1	665	335	fig|573.1888.peg.665	Tellurite resistance protein TehA	bi	1	963	fig|573.2207.peg.963	100	Tellurite resistance protein TehA	bi	1	659	fig|573.2212.peg.659	100	Tellurite resistance protein TehA	bi	1	4316	fig|573.2215.peg.4316	99.7	Tellurite resistance protein TehA	bi	1	2840	fig|573.2241.peg.2840	100	Tellurite resistance protein TehA
1	666	199	fig|573.1888.peg.666	Tellurite resistance protein TehB	bi	1	962	fig|573.2207.peg.962	100	Tellurite resistance protein TehB	bi	1	660	fig|573.2212.peg.660	100	Tellurite resistance protein TehB	bi	1	4315	fig|573.2215.peg.4315	98.97	Tellurite resistance protein TehB	bi	1	2839	fig|573.2241.peg.2839	99.49	Tellurite resistance protein TehB
1	667	223	fig|573.1888.peg.667	Uncharacterized membrane lipoprotein clustered with tellurite resistance proteins TehA/TehB	bi	1	961	fig|573.2207.peg.961	100	Uncharacterized membrane lipoprotein clustered with tellurite resistance proteins TehA/TehB	bi	1	662	fig|573.2212.peg.662	100	Uncharacterized membrane lipoprotein clustered with tellurite resistance proteins TehA/TehB	bi	1	4314	fig|573.2215.peg.4314	99.55	Uncharacterized membrane lipoprotein clustered with tellurite resistance proteins TehA/TehB	bi	1	2838	fig|573.2241.peg.2838	99.1	Uncharacterized membrane lipoprotein clustered with tellurite resistance proteins TehA/TehB
1	668	299	fig|573.1888.peg.668	Permease of the drug/metabolite transporter (DMT) superfamily	bi	1	960	fig|573.2207.peg.960	100	Permease of the drug/metabolite transporter (DMT) superfamily	bi	1	663	fig|573.2212.peg.663	100	Permease of the drug/metabolite transporter (DMT) superfamily	bi	1	4313	fig|573.2215.peg.4313	100	Permease of the drug/metabolite transporter (DMT) superfamily	bi	1	2837	fig|573.2241.peg.2837	99.33	Permease of the drug/metabolite transporter (DMT) superfamily
1	669	290	fig|573.1888.peg.669	Transcriptional regulator, AraC family	bi	1	959	fig|573.2207.peg.959	100	Transcriptional regulator, AraC family	bi	1	664	fig|573.2212.peg.664	100	Transcriptional regulator, AraC family	bi	1	4312	fig|573.2215.peg.4312	100	Transcriptional regulator, AraC family	bi	1	2836	fig|573.2241.peg.2836	100	Transcriptional regulator, AraC family
1	670	389	fig|573.1888.peg.670	Benzoate transport protein	bi	1	958	fig|573.2207.peg.958	100	Benzoate transport protein	bi	1	665	fig|573.2212.peg.665	100	Benzoate transport protein	bi	1	4311	fig|573.2215.peg.4311	99.48	Benzoate transport protein	bi	1	2835	fig|573.2241.peg.2835	98.97	Benzoate transport protein
1	671	190	fig|573.1888.peg.671	Transcriptional regulator yidN, Cro/CI family	bi	1	957	fig|573.2207.peg.957	100	Transcriptional regulator yidN, Cro/CI family	bi	1	666	fig|573.2212.peg.666	99.47	Transcriptional regulator yidN, Cro/CI family	bi	1	4310	fig|573.2215.peg.4310	100	Transcriptional regulator yidN, Cro/CI family	bi	1	2834	fig|573.2241.peg.2834	100	Transcriptional regulator yidN, Cro/CI family
1	672	56	fig|573.1888.peg.672	FIG00732552: hypothetical protein	bi	1	956	fig|573.2207.peg.956	100	FIG00732552: hypothetical protein	bi	1	667	fig|573.2212.peg.667	100	FIG00732552: hypothetical protein	bi	1	4309	fig|573.2215.peg.4309	98.18	FIG00732552: hypothetical protein	bi	1	2833	fig|573.2241.peg.2833	100	FIG00732552: hypothetical protein
1	673	654	fig|573.1888.peg.673	putative collagenase	bi	1	955	fig|573.2207.peg.955	100	putative collagenase	bi	1	668	fig|573.2212.peg.668	100	putative collagenase	bi	1	4308	fig|573.2215.peg.4308	100	putative collagenase	bi	1	2832	fig|573.2241.peg.2832	100	putative collagenase
1	674	77	fig|573.1888.peg.674	FIG00733009: hypothetical protein	bi	1	954	fig|573.2207.peg.954	100	FIG00733009: hypothetical protein	bi	1	669	fig|573.2212.peg.669	100	FIG00733009: hypothetical protein	bi	1	4307	fig|573.2215.peg.4307	100	FIG00733009: hypothetical protein	bi	1	2831	fig|573.2241.peg.2831	100	FIG00733009: hypothetical protein
1	675	121	fig|573.1888.peg.675	FIG00732657: hypothetical protein	bi	1	953	fig|573.2207.peg.953	100	FIG00732657: hypothetical protein	bi	1	670	fig|573.2212.peg.670	94.49	FIG00732657: hypothetical protein	bi	1	4306	fig|573.2215.peg.4306	97.22	FIG00732657: hypothetical protein	bi	1	2830	fig|573.2241.peg.2830	92.59	FIG00732657: hypothetical protein
1	676	42	fig|573.1888.peg.676	hypothetical protein	bi	1	952	fig|573.2207.peg.952	100	hypothetical protein	bi	1	671	fig|573.2212.peg.671	100	hypothetical protein	bi	1	4305	fig|573.2215.peg.4305	100	hypothetical protein	bi	1	2829	fig|573.2241.peg.2829	100	hypothetical protein
1	677	337	fig|573.1888.peg.677	putative Cytochrome bd2, subunit II	bi	1	951	fig|573.2207.peg.951	100	putative Cytochrome bd2, subunit II	bi	1	672	fig|573.2212.peg.672	100	putative Cytochrome bd2, subunit II	bi	1	4304	fig|573.2215.peg.4304	99.7	putative Cytochrome bd2, subunit II	bi	1	2828	fig|573.2241.peg.2828	99.7	putative Cytochrome bd2, subunit II
1	678	466	fig|573.1888.peg.678	putative Cytochrome bd2, subunit I	bi	1	950	fig|573.2207.peg.950	100	putative Cytochrome bd2, subunit I	bi	1	673	fig|573.2212.peg.673	98.49	putative Cytochrome bd2, subunit I	bi	1	4303	fig|573.2215.peg.4303	100	putative Cytochrome bd2, subunit I	bi	1	2827	fig|573.2241.peg.2827	100	putative Cytochrome bd2, subunit I
1	679	471	fig|573.1888.peg.679	Transcriptional regulator, GntR family domain / Aspartate aminotransferase (EC 2.6.1.1)	bi	1	949	fig|573.2207.peg.949	100	Transcriptional regulator, GntR family domain / Aspartate aminotransferase (EC 2.6.1.1)	bi	1	674	fig|573.2212.peg.674	100	Transcriptional regulator, GntR family domain / Aspartate aminotransferase (EC 2.6.1.1)	bi	1	4302	fig|573.2215.peg.4302	100	Transcriptional regulator, GntR family domain / Aspartate aminotransferase (EC 2.6.1.1)	bi	1	2826	fig|573.2241.peg.2826	100	Transcriptional regulator, GntR family domain / Aspartate aminotransferase (EC 2.6.1.1)
1	680	382	fig|573.1888.peg.680	ABC transporter, periplasmic spermidine putrescine-binding protein PotD (TC 3.A.1.11.1)	bi	1	948	fig|573.2207.peg.948	100	ABC transporter, periplasmic spermidine putrescine-binding protein PotD (TC 3.A.1.11.1)	bi	1	675	fig|573.2212.peg.675	100	ABC transporter, periplasmic spermidine putrescine-binding protein PotD (TC 3.A.1.11.1)	bi	1	4301	fig|573.2215.peg.4301	100	ABC transporter, periplasmic spermidine putrescine-binding protein PotD (TC 3.A.1.11.1)	bi	1	2825	fig|573.2241.peg.2825	100	ABC transporter, periplasmic spermidine putrescine-binding protein PotD (TC 3.A.1.11.1)
1	681	338	fig|573.1888.peg.681	Putrescine transport ATP-binding protein PotA (TC 3.A.1.11.1)	bi	1	947	fig|573.2207.peg.947	100	Putrescine transport ATP-binding protein PotA (TC 3.A.1.11.1)	bi	1	676	fig|573.2212.peg.676	100	Putrescine transport ATP-binding protein PotA (TC 3.A.1.11.1)	bi	1	4300	fig|573.2215.peg.4300	99.41	Putrescine transport ATP-binding protein PotA (TC 3.A.1.11.1)	bi	1	2824	fig|573.2241.peg.2824	99.41	Putrescine transport ATP-binding protein PotA (TC 3.A.1.11.1)
1	682	310	fig|573.1888.peg.682	Spermidine Putrescine ABC transporter permease component PotB (TC 3.A.1.11.1)	bi	1	946	fig|573.2207.peg.946	100	Spermidine Putrescine ABC transporter permease component PotB (TC 3.A.1.11.1)	bi	1	677	fig|573.2212.peg.677	100	Spermidine Putrescine ABC transporter permease component PotB (TC 3.A.1.11.1)	bi	1	4299	fig|573.2215.peg.4299	99.35	Spermidine Putrescine ABC transporter permease component PotB (TC 3.A.1.11.1)	bi	1	2823	fig|573.2241.peg.2823	99.68	Spermidine Putrescine ABC transporter permease component PotB (TC 3.A.1.11.1)
1	683	269	fig|573.1888.peg.683	Spermidine Putrescine ABC transporter permease component potC (TC_3.A.1.11.1)	bi	1	945	fig|573.2207.peg.945	100	Spermidine Putrescine ABC transporter permease component potC (TC_3.A.1.11.1)	bi	1	678	fig|573.2212.peg.678	100	Spermidine Putrescine ABC transporter permease component potC (TC_3.A.1.11.1)	bi	1	4298	fig|573.2215.peg.4298	99.63	Spermidine Putrescine ABC transporter permease component potC (TC_3.A.1.11.1)	bi	1	2822	fig|573.2241.peg.2822	99.63	Spermidine Putrescine ABC transporter permease component potC (TC_3.A.1.11.1)
1	684	482	fig|573.1888.peg.684	4-aminobutyraldehyde dehydrogenase (EC 1.2.1.19)	bi	1	944	fig|573.2207.peg.944	100	4-aminobutyraldehyde dehydrogenase (EC 1.2.1.19)	bi	1	679	fig|573.2212.peg.679	100	4-aminobutyraldehyde dehydrogenase (EC 1.2.1.19)	bi	1	4297	fig|573.2215.peg.4297	100	4-aminobutyraldehyde dehydrogenase (EC 1.2.1.19)	bi	1	2821	fig|573.2241.peg.2821	99.38	4-aminobutyraldehyde dehydrogenase (EC 1.2.1.19)
1	685	41	fig|573.1888.peg.685	hypothetical protein	bi	1	943	fig|573.2207.peg.943	100	hypothetical protein	bi	1	680	fig|573.2212.peg.680	100	hypothetical protein	bi	1	4296	fig|573.2215.peg.4296	100	hypothetical protein	bi	1	2820	fig|573.2241.peg.2820	100	hypothetical protein
1	686	84	fig|573.1888.peg.686	FIG00732056: hypothetical protein	bi	1	942	fig|573.2207.peg.942	100	FIG00732056: hypothetical protein	bi	1	681	fig|573.2212.peg.681	100	FIG00732056: hypothetical protein	bi	1	4295	fig|573.2215.peg.4295	100	FIG00732056: hypothetical protein	bi	1	2819	fig|573.2241.peg.2819	100	FIG00732056: hypothetical protein
1	687	58	fig|573.1888.peg.687	FIG00732054: hypothetical protein	bi	1	941	fig|573.2207.peg.941	100	FIG00732054: hypothetical protein	bi	1	682	fig|573.2212.peg.682	100	FIG00732054: hypothetical protein	bi	1	4294	fig|573.2215.peg.4294	100	FIG00732054: hypothetical protein	bi	1	2818	fig|573.2241.peg.2818	100	FIG00732054: hypothetical protein
1	688	250	fig|573.1888.peg.688	alpha/beta hydrolase fold	bi	1	940	fig|573.2207.peg.940	100	alpha/beta hydrolase fold	bi	1	683	fig|573.2212.peg.683	100	alpha/beta hydrolase fold	bi	1	4293	fig|573.2215.peg.4293	98.8	alpha/beta hydrolase fold	bi	1	2817	fig|573.2241.peg.2817	98.39	alpha/beta hydrolase fold
1	689	478	fig|573.1888.peg.689	4-aminobutyraldehyde dehydrogenase (EC 1.2.1.19)	bi	1	939	fig|573.2207.peg.939	100	4-aminobutyraldehyde dehydrogenase (EC 1.2.1.19)	bi	1	684	fig|573.2212.peg.684	100	4-aminobutyraldehyde dehydrogenase (EC 1.2.1.19)	bi	1	4292	fig|573.2215.peg.4292	99.79	4-aminobutyraldehyde dehydrogenase (EC 1.2.1.19)	bi	1	2816	fig|573.2241.peg.2816	99.79	4-aminobutyraldehyde dehydrogenase (EC 1.2.1.19)
1	690	42	fig|573.1888.peg.690	hypothetical protein	bi	1	938	fig|573.2207.peg.938	100	hypothetical protein	-				0		bi	1	4291	fig|573.2215.peg.4291	97.56	hypothetical protein	-				0
1	691	533	fig|573.1888.peg.691	Dipeptide-binding ABC transporter, periplasmic substrate-binding component (TC 3.A.1.5.2)	bi	1	937	fig|573.2207.peg.937	99.81	Dipeptide-binding ABC transporter, periplasmic substrate-binding component (TC 3.A.1.5.2)	bi	1	685	fig|573.2212.peg.685	100	Dipeptide-binding ABC transporter, periplasmic substrate-binding component (TC 3.A.1.5.2)	bi	1	4290	fig|573.2215.peg.4290	99.81	Dipeptide-binding ABC transporter, periplasmic substrate-binding component (TC 3.A.1.5.2)	bi	1	2815	fig|573.2241.peg.2815	100	Dipeptide-binding ABC transporter, periplasmic substrate-binding component (TC 3.A.1.5.2)
1	692	78	fig|573.1888.peg.692	FIG00731530: hypothetical protein	bi	1	936	fig|573.2207.peg.936	100	FIG00731530: hypothetical protein	bi	1	686	fig|573.2212.peg.686	100	FIG00731530: hypothetical protein	bi	1	4289	fig|573.2215.peg.4289	100	FIG00731530: hypothetical protein	bi	1	2814	fig|573.2241.peg.2814	100	FIG00731530: hypothetical protein
1	693	150	fig|573.1888.peg.693	Putative inner membrane protein	bi	1	935	fig|573.2207.peg.935	100	Putative inner membrane protein	bi	1	687	fig|573.2212.peg.687	100	Putative inner membrane protein	bi	1	4288	fig|573.2215.peg.4288	99.33	Putative inner membrane protein	bi	1	2813	fig|573.2241.peg.2813	100	Putative inner membrane protein
1	694	173	fig|573.1888.peg.694	Putative acetyltransferase	bi	1	934	fig|573.2207.peg.934	100	Putative acetyltransferase	bi	1	688	fig|573.2212.peg.688	100	Putative acetyltransferase	bi	1	4287	fig|573.2215.peg.4287	100	Putative acetyltransferase	bi	1	2812	fig|573.2241.peg.2812	100	Putative acetyltransferase
1	695	194	fig|573.1888.peg.695	Transcriptional regulator	bi	1	933	fig|573.2207.peg.933	100	Transcriptional regulator	bi	1	689	fig|573.2212.peg.689	100	Transcriptional regulator	bi	1	4286	fig|573.2215.peg.4286	99.48	Transcriptional regulator	bi	1	2811	fig|573.2241.peg.2811	99.48	Transcriptional regulator
1	696	346	fig|573.1888.peg.696	Putative oxidoreductase YncB	bi	1	932	fig|573.2207.peg.932	100	Putative oxidoreductase YncB	bi	1	690	fig|573.2212.peg.690	100	Putative oxidoreductase YncB	bi	1	4285	fig|573.2215.peg.4285	100	Putative oxidoreductase YncB	bi	1	2810	fig|573.2241.peg.2810	100	Putative oxidoreductase YncB
1	697	312	fig|573.1888.peg.697	Inosine-uridine preferring nucleoside hydrolase (EC 3.2.2.1)	bi	1	931	fig|573.2207.peg.931	100	Inosine-uridine preferring nucleoside hydrolase (EC 3.2.2.1)	bi	1	691	fig|573.2212.peg.691	100	Inosine-uridine preferring nucleoside hydrolase (EC 3.2.2.1)	bi	1	4284	fig|573.2215.peg.4284	100	Inosine-uridine preferring nucleoside hydrolase (EC 3.2.2.1)	bi	1	2809	fig|573.2241.peg.2809	100	Inosine-uridine preferring nucleoside hydrolase (EC 3.2.2.1)
1	698	77	fig|573.1888.peg.698	FIG00731545: hypothetical protein	bi	1	930	fig|573.2207.peg.930	100	FIG00731545: hypothetical protein	bi	1	692	fig|573.2212.peg.692	100	FIG00731545: hypothetical protein	bi	1	4283	fig|573.2215.peg.4283	100	FIG00731545: hypothetical protein	bi	1	2808	fig|573.2241.peg.2808	97.37	FIG00731545: hypothetical protein
1	699	100	fig|573.1888.peg.699	FIG00732191: hypothetical protein	bi	1	929	fig|573.2207.peg.929	100	FIG00732191: hypothetical protein	bi	1	693	fig|573.2212.peg.693	100	FIG00732191: hypothetical protein	bi	1	4282	fig|573.2215.peg.4282	100	FIG00732191: hypothetical protein	bi	1	2807	fig|573.2241.peg.2807	100	FIG00732191: hypothetical protein
1	700	569	fig|573.1888.peg.700	FIG00731994: hypothetical protein	bi	1	928	fig|573.2207.peg.928	99.82	FIG00731994: hypothetical protein	bi	1	694	fig|573.2212.peg.694	99.82	FIG00731994: hypothetical protein	bi	1	4281	fig|573.2215.peg.4281	99.82	FIG00731994: hypothetical protein	bi	1	2806	fig|573.2241.peg.2806	99.12	FIG00731994: hypothetical protein
1	701	702	fig|573.1888.peg.701	Probable tonB-dependent receptor yncD precursor	bi	1	927	fig|573.2207.peg.927	100	Probable tonB-dependent receptor yncD precursor	bi	1	695	fig|573.2212.peg.695	99.86	Probable tonB-dependent receptor yncD precursor	bi	1	4280	fig|573.2215.peg.4280	99.86	Probable tonB-dependent receptor yncD precursor	bi	1	2805	fig|573.2241.peg.2805	99.71	Probable tonB-dependent receptor yncD precursor
1	702	354	fig|573.1888.peg.702	FIG00731341: hypothetical protein	bi	1	926	fig|573.2207.peg.926	100	FIG00731341: hypothetical protein	bi	1	696	fig|573.2212.peg.696	100	FIG00731341: hypothetical protein	bi	1	4279	fig|573.2215.peg.4279	100	FIG00731341: hypothetical protein	bi	1	2804	fig|573.2241.peg.2804	100	FIG00731341: hypothetical protein
1	703	74	fig|573.1888.peg.703	Putative outer membrane lipoprotein	bi	1	925	fig|573.2207.peg.925	100	Putative outer membrane lipoprotein	bi	1	697	fig|573.2212.peg.697	100	Putative outer membrane lipoprotein	bi	1	4278	fig|573.2215.peg.4278	100	Putative outer membrane lipoprotein	bi	1	2803	fig|573.2241.peg.2803	98.63	Putative outer membrane lipoprotein
1	704	485	fig|573.1888.peg.704	L-asparagine permease	bi	1	924	fig|573.2207.peg.924	100	L-asparagine permease	bi	1	698	fig|573.2212.peg.698	100	L-asparagine permease	bi	1	4277	fig|573.2215.peg.4277	100	L-asparagine permease	bi	1	2802	fig|573.2241.peg.2802	100	L-asparagine permease
1	705	296	fig|573.1888.peg.705	Transcriptional regulator, LysR family	bi	1	923	fig|573.2207.peg.923	100	Transcriptional regulator, LysR family	bi	1	699	fig|573.2212.peg.699	100	Transcriptional regulator, LysR family	bi	1	4276	fig|573.2215.peg.4276	100	Transcriptional regulator, LysR family	bi	1	2801	fig|573.2241.peg.2801	99.32	Transcriptional regulator, LysR family
1	706	184	fig|573.1888.peg.706	DNA topology modulation protein	bi	1	922	fig|573.2207.peg.922	100	DNA topology modulation protein	bi	1	700	fig|573.2212.peg.700	100	DNA topology modulation protein	bi	1	4275	fig|573.2215.peg.4275	100	DNA topology modulation protein	bi	1	2800	fig|573.2241.peg.2800	99.45	DNA topology modulation protein
1	707	336	fig|573.1888.peg.707	Bacterial luciferase family protein YtmO, in cluster with L-cystine ABC transporter	bi	1	921	fig|573.2207.peg.921	100	Bacterial luciferase family protein YtmO, in cluster with L-cystine ABC transporter	bi	1	701	fig|573.2212.peg.701	100	Bacterial luciferase family protein YtmO, in cluster with L-cystine ABC transporter	bi	1	4274	fig|573.2215.peg.4274	99.7	Bacterial luciferase family protein YtmO, in cluster with L-cystine ABC transporter	bi	1	2799	fig|573.2241.peg.2799	100	Bacterial luciferase family protein YtmO, in cluster with L-cystine ABC transporter
1	708	374	fig|573.1888.peg.708	N-acetyl-L,L-diaminopimelate deacetylase homolog (EC 3.5.1.18)	bi	1	920	fig|573.2207.peg.920	100	N-acetyl-L,L-diaminopimelate deacetylase homolog (EC 3.5.1.18)	bi	1	702	fig|573.2212.peg.702	100	N-acetyl-L,L-diaminopimelate deacetylase homolog (EC 3.5.1.18)	bi	1	4273	fig|573.2215.peg.4273	100	N-acetyl-L,L-diaminopimelate deacetylase homolog (EC 3.5.1.18)	bi	1	2798	fig|573.2241.peg.2798	99.46	N-acetyl-L,L-diaminopimelate deacetylase homolog (EC 3.5.1.18)
1	709	438	fig|573.1888.peg.709	Nitrilotriacetate monooxygenase component A (EC 1.14.13.-)	bi	1	919	fig|573.2207.peg.919	100	Nitrilotriacetate monooxygenase component A (EC 1.14.13.-)	bi	1	703	fig|573.2212.peg.703	100	Nitrilotriacetate monooxygenase component A (EC 1.14.13.-)	bi	1	4272	fig|573.2215.peg.4272	100	Nitrilotriacetate monooxygenase component A (EC 1.14.13.-)	bi	1	2797	fig|573.2241.peg.2797	100	Nitrilotriacetate monooxygenase component A (EC 1.14.13.-)
1	710	311	fig|573.1888.peg.710	Periplasmic binding protein	bi	1	918	fig|573.2207.peg.918	100	Periplasmic binding protein	bi	1	704	fig|573.2212.peg.704	100	Periplasmic binding protein	bi	1	4271	fig|573.2215.peg.4271	100	Periplasmic binding protein	bi	1	2796	fig|573.2241.peg.2796	100	Periplasmic binding protein
1	711	170	fig|573.1888.peg.711	GCN5-related N-acetyltransferase	bi	1	917	fig|573.2207.peg.917	100	GCN5-related N-acetyltransferase	bi	1	705	fig|573.2212.peg.705	100	GCN5-related N-acetyltransferase	bi	1	4270	fig|573.2215.peg.4270	100	GCN5-related N-acetyltransferase	bi	1	2795	fig|573.2241.peg.2795	99.41	GCN5-related N-acetyltransferase
1	712	309	fig|573.1888.peg.712	Amino acid ABC transporter permease protein	bi	1	916	fig|573.2207.peg.916	100	Amino acid ABC transporter permease protein	bi	1	706	fig|573.2212.peg.706	100	Amino acid ABC transporter permease protein	bi	1	4269	fig|573.2215.peg.4269	100	Amino acid ABC transporter permease protein	bi	1	2794	fig|573.2241.peg.2794	99.35	Amino acid ABC transporter permease protein
1	713	260	fig|573.1888.peg.713	Amino acid ABC transporter, ATP-binding protein	bi	1	915	fig|573.2207.peg.915	100	Amino acid ABC transporter, ATP-binding protein	bi	1	707	fig|573.2212.peg.707	100	Amino acid ABC transporter, ATP-binding protein	bi	1	4268	fig|573.2215.peg.4268	100	Amino acid ABC transporter, ATP-binding protein	bi	1	2793	fig|573.2241.peg.2793	99.61	Amino acid ABC transporter, ATP-binding protein
1	714	293	fig|573.1888.peg.714	Periplasmic binding protein	bi	1	914	fig|573.2207.peg.914	100	Periplasmic binding protein	bi	1	708	fig|573.2212.peg.708	100	Periplasmic binding protein	bi	1	4267	fig|573.2215.peg.4267	100	Periplasmic binding protein	bi	1	2792	fig|573.2241.peg.2792	100	Periplasmic binding protein
1	715	206	fig|573.1888.peg.715	Glutathione S-transferase, theta (EC 2.5.1.18)	bi	1	913	fig|573.2207.peg.913	100	Glutathione S-transferase, theta (EC 2.5.1.18)	bi	1	709	fig|573.2212.peg.709	100	Glutathione S-transferase, theta (EC 2.5.1.18)	bi	1	4266	fig|573.2215.peg.4266	100	Glutathione S-transferase, theta (EC 2.5.1.18)	bi	1	2791	fig|573.2241.peg.2791	99.51	Glutathione S-transferase, theta (EC 2.5.1.18)
1	716	76	fig|573.1888.peg.716	Probable tautomerase ydcE (EC 5.3.2.-)	bi	1	912	fig|573.2207.peg.912	100	Probable tautomerase ydcE (EC 5.3.2.-)	bi	1	710	fig|573.2212.peg.710	100	Probable tautomerase ydcE (EC 5.3.2.-)	bi	1	4265	fig|573.2215.peg.4265	100	Probable tautomerase ydcE (EC 5.3.2.-)	bi	1	2790	fig|573.2241.peg.2790	97.33	Probable tautomerase ydcE (EC 5.3.2.-)
1	717	99	fig|573.1888.peg.717	FIG00637861: hypothetical protein	bi	1	911	fig|573.2207.peg.911	100	FIG00637861: hypothetical protein	bi	1	711	fig|573.2212.peg.711	100	FIG00637861: hypothetical protein	bi	1	4264	fig|573.2215.peg.4264	100	FIG00637861: hypothetical protein	bi	1	2789	fig|573.2241.peg.2789	98.98	FIG00637861: hypothetical protein
1	718	539	fig|573.1888.peg.718	Maltoporin (maltose/maltodextrin high-affinity receptor, phage lambda receptor protein)	bi	1	910	fig|573.2207.peg.910	100	Maltoporin (maltose/maltodextrin high-affinity receptor, phage lambda receptor protein)	bi	1	712	fig|573.2212.peg.712	100	Maltoporin (maltose/maltodextrin high-affinity receptor, phage lambda receptor protein)	bi	1	4263	fig|573.2215.peg.4263	99.81	Maltoporin (maltose/maltodextrin high-affinity receptor, phage lambda receptor protein)	bi	1	2788	fig|573.2241.peg.2788	99.63	Maltoporin (maltose/maltodextrin high-affinity receptor, phage lambda receptor protein)
1	719	461	fig|573.1888.peg.719	Xyloside transporter XynT	bi	1	909	fig|573.2207.peg.909	100	Xyloside transporter XynT	bi	1	713	fig|573.2212.peg.713	100	Xyloside transporter XynT	bi	1	4262	fig|573.2215.peg.4262	100	Xyloside transporter XynT	bi	1	2787	fig|573.2241.peg.2787	99.57	Xyloside transporter XynT
1	720	523	fig|573.1888.peg.720	Alfa-L-rhamnosidase (EC 3.2.1.40)	bi	1	908	fig|573.2207.peg.908	100	Alfa-L-rhamnosidase (EC 3.2.1.40)	bi	1	715	fig|573.2212.peg.715	100	Alfa-L-rhamnosidase (EC 3.2.1.40)	bi	1	4261	fig|573.2215.peg.4261	99.81	Alfa-L-rhamnosidase (EC 3.2.1.40)	bi	1	2786	fig|573.2241.peg.2786	99.23	Alfa-L-rhamnosidase (EC 3.2.1.40)
1	721	275	fig|573.1888.peg.721	L-rhamnose operon regulatory protein RhaS	bi	1	907	fig|573.2207.peg.907	100	L-rhamnose operon regulatory protein RhaS	bi	1	716	fig|573.2212.peg.716	100	L-rhamnose operon regulatory protein RhaS	bi	1	4260	fig|573.2215.peg.4260	100	L-rhamnose operon regulatory protein RhaS	bi	1	2785	fig|573.2241.peg.2785	99.64	L-rhamnose operon regulatory protein RhaS
1	722	194	fig|573.1888.peg.722	NAD(P)H-flavin oxidoreductase	bi	1	906	fig|573.2207.peg.906	100	NAD(P)H-flavin oxidoreductase	bi	1	717	fig|573.2212.peg.717	100	NAD(P)H-flavin oxidoreductase	bi	1	4259	fig|573.2215.peg.4259	100	NAD(P)H-flavin oxidoreductase	bi	1	2784	fig|573.2241.peg.2784	100	NAD(P)H-flavin oxidoreductase
1	723	235	fig|573.1888.peg.723	Ferric iron ABC transporter, ATP-binding protein	bi	1	905	fig|573.2207.peg.905	100	Ferric iron ABC transporter, ATP-binding protein	bi	1	718	fig|573.2212.peg.718	100	Ferric iron ABC transporter, ATP-binding protein	bi	1	4258	fig|573.2215.peg.4258	100	Ferric iron ABC transporter, ATP-binding protein	bi	1	2783	fig|573.2241.peg.2783	99.15	Ferric iron ABC transporter, ATP-binding protein
1	724	323	fig|573.1888.peg.724	Ferric iron ABC transporter, iron-binding protein	bi	1	904	fig|573.2207.peg.904	100	Ferric iron ABC transporter, iron-binding protein	bi	1	719	fig|573.2212.peg.719	99.68	Ferric iron ABC transporter, iron-binding protein	bi	1	4257	fig|573.2215.peg.4257	99.35	Ferric iron ABC transporter, iron-binding protein	bi	1	2782	fig|573.2241.peg.2782	99.03	Ferric iron ABC transporter, iron-binding protein
1	725	552	fig|573.1888.peg.725	Ferric iron ABC transporter, permease protein	bi	1	903	fig|573.2207.peg.903	100	Ferric iron ABC transporter, permease protein	bi	1	720	fig|573.2212.peg.720	99.82	Ferric iron ABC transporter, permease protein	bi	1	4256	fig|573.2215.peg.4256	99.82	Ferric iron ABC transporter, permease protein	bi	1	2781	fig|573.2241.peg.2781	99.27	Ferric iron ABC transporter, permease protein
1	726	282	fig|573.1888.peg.726	N-hydroxyarylamine O-acetyltransferase (EC 2.3.1.118)	bi	1	902	fig|573.2207.peg.902	100	N-hydroxyarylamine O-acetyltransferase (EC 2.3.1.118)	bi	1	721	fig|573.2212.peg.721	100	N-hydroxyarylamine O-acetyltransferase (EC 2.3.1.118)	bi	1	4255	fig|573.2215.peg.4255	99.64	N-hydroxyarylamine O-acetyltransferase (EC 2.3.1.118)	bi	1	2780	fig|573.2241.peg.2780	99.64	N-hydroxyarylamine O-acetyltransferase (EC 2.3.1.118)
1	727	227	fig|573.1888.peg.727	Respiratory nitrate reductase gamma chain (EC 1.7.99.4)	bi	1	901	fig|573.2207.peg.901	100	Respiratory nitrate reductase gamma chain (EC 1.7.99.4)	bi	1	722	fig|573.2212.peg.722	100	Respiratory nitrate reductase gamma chain (EC 1.7.99.4)	bi	1	4254	fig|573.2215.peg.4254	100	Respiratory nitrate reductase gamma chain (EC 1.7.99.4)	bi	1	2779	fig|573.2241.peg.2779	99.12	Respiratory nitrate reductase gamma chain (EC 1.7.99.4)
1	728	232	fig|573.1888.peg.728	Respiratory nitrate reductase delta chain (EC 1.7.99.4)	bi	1	900	fig|573.2207.peg.900	100	Respiratory nitrate reductase delta chain (EC 1.7.99.4)	bi	1	723	fig|573.2212.peg.723	100	Respiratory nitrate reductase delta chain (EC 1.7.99.4)	bi	1	4253	fig|573.2215.peg.4253	100	Respiratory nitrate reductase delta chain (EC 1.7.99.4)	bi	1	2778	fig|573.2241.peg.2778	99.13	Respiratory nitrate reductase delta chain (EC 1.7.99.4)
1	729	515	fig|573.1888.peg.729	Respiratory nitrate reductase beta chain (EC 1.7.99.4)	bi	1	899	fig|573.2207.peg.899	100	Respiratory nitrate reductase beta chain (EC 1.7.99.4)	bi	1	724	fig|573.2212.peg.724	100	Respiratory nitrate reductase beta chain (EC 1.7.99.4)	bi	1	4252	fig|573.2215.peg.4252	100	Respiratory nitrate reductase beta chain (EC 1.7.99.4)	bi	1	2777	fig|573.2241.peg.2777	99.61	Respiratory nitrate reductase beta chain (EC 1.7.99.4)
1	730	1247	fig|573.1888.peg.730	Respiratory nitrate reductase alpha chain (EC 1.7.99.4)	bi	1	898	fig|573.2207.peg.898	100	Respiratory nitrate reductase alpha chain (EC 1.7.99.4)	bi	1	725	fig|573.2212.peg.725	99.92	Respiratory nitrate reductase alpha chain (EC 1.7.99.4)	bi	1	4251	fig|573.2215.peg.4251	99.92	Respiratory nitrate reductase alpha chain (EC 1.7.99.4)	bi	1	2776	fig|573.2241.peg.2776	99.76	Respiratory nitrate reductase alpha chain (EC 1.7.99.4)
1	731	461	fig|573.1888.peg.731	Nitrate/nitrite transporter NarK	bi	1	897	fig|573.2207.peg.897	100	Nitrate/nitrite transporter NarK	bi	1	726	fig|573.2212.peg.726	99.76	Nitrate/nitrite transporter NarK	bi	1	4250	fig|573.2215.peg.4250	100	Nitrate/nitrite transporter NarK	bi	1	2775	fig|573.2241.peg.2775	99.76	Nitrate/nitrite transporter NarK
1	732	192	fig|573.1888.peg.732	Transcriptional regulator, TetR family	bi	1	896	fig|573.2207.peg.896	100	Transcriptional regulator, TetR family	bi	1	727	fig|573.2212.peg.727	100	Transcriptional regulator, TetR family	bi	1	4249	fig|573.2215.peg.4249	100	Transcriptional regulator, TetR family	bi	1	2774	fig|573.2241.peg.2774	99.48	Transcriptional regulator, TetR family
1	733	500	fig|573.1888.peg.733	Methyl viologen resistance protein smvA	bi	1	895	fig|573.2207.peg.895	100	Methyl viologen resistance protein smvA	bi	1	728	fig|573.2212.peg.728	100	Methyl viologen resistance protein smvA	bi	1	4248	fig|573.2215.peg.4248	100	Methyl viologen resistance protein smvA	bi	1	2773	fig|573.2241.peg.2773	100	Methyl viologen resistance protein smvA
1	734	299	fig|573.1888.peg.734	Pca regulon regulatory protein PcaR	bi	1	894	fig|573.2207.peg.894	100	Pca regulon regulatory protein PcaR	bi	1	729	fig|573.2212.peg.729	100	Pca regulon regulatory protein PcaR	bi	1	4247	fig|573.2215.peg.4247	99.66	Pca regulon regulatory protein PcaR	bi	1	2772	fig|573.2241.peg.2772	99.62	Pca regulon regulatory protein PcaR
1	735	373	fig|573.1888.peg.735	Muconate cycloisomerase (EC 5.5.1.1)	bi	1	893	fig|573.2207.peg.893	100	Muconate cycloisomerase (EC 5.5.1.1)	bi	1	730	fig|573.2212.peg.730	100	Muconate cycloisomerase (EC 5.5.1.1)	bi	1	4246	fig|573.2215.peg.4246	98.92	Muconate cycloisomerase (EC 5.5.1.1)	bi	1	2771	fig|573.2241.peg.2771	99.46	Muconate cycloisomerase (EC 5.5.1.1)
1	736	97	fig|573.1888.peg.736	Muconolactone isomerase (EC 5.3.3.4)	bi	1	892	fig|573.2207.peg.892	100	Muconolactone isomerase (EC 5.3.3.4)	bi	1	731	fig|573.2212.peg.731	100	Muconolactone isomerase (EC 5.3.3.4)	bi	1	4245	fig|573.2215.peg.4245	98.96	Muconolactone isomerase (EC 5.3.3.4)	bi	1	2770	fig|573.2241.peg.2770	98.96	Muconolactone isomerase (EC 5.3.3.4)
1	737	309	fig|573.1888.peg.737	Catechol 1,2-dioxygenase (EC 1.13.11.1)	bi	1	891	fig|573.2207.peg.891	100	Catechol 1,2-dioxygenase (EC 1.13.11.1)	bi	1	732	fig|573.2212.peg.732	100	Catechol 1,2-dioxygenase (EC 1.13.11.1)	bi	1	4244	fig|573.2215.peg.4244	100	Catechol 1,2-dioxygenase (EC 1.13.11.1)	bi	1	2769	fig|573.2241.peg.2769	100	Catechol 1,2-dioxygenase (EC 1.13.11.1)
1	738	461	fig|573.1888.peg.738	Benzoate 1,2-dioxygenase alpha subunit (EC 1.14.12.10)	bi	1	890	fig|573.2207.peg.890	100	Benzoate 1,2-dioxygenase alpha subunit (EC 1.14.12.10)	bi	1	733	fig|573.2212.peg.733	100	Benzoate 1,2-dioxygenase alpha subunit (EC 1.14.12.10)	bi	1	4243	fig|573.2215.peg.4243	98.48	Benzoate 1,2-dioxygenase alpha subunit (EC 1.14.12.10)	bi	1	2768	fig|573.2241.peg.2768	96.74	Benzoate 1,2-dioxygenase alpha subunit (EC 1.14.12.10)
1	739	162	fig|573.1888.peg.739	Benzoate 1,2-dioxygenase beta subunit (EC 1.14.12.10)	bi	1	889	fig|573.2207.peg.889	100	Benzoate 1,2-dioxygenase beta subunit (EC 1.14.12.10)	bi	1	734	fig|573.2212.peg.734	100	Benzoate 1,2-dioxygenase beta subunit (EC 1.14.12.10)	bi	1	4242	fig|573.2215.peg.4242	99.38	Benzoate 1,2-dioxygenase beta subunit (EC 1.14.12.10)	bi	1	2767	fig|573.2241.peg.2767	99.38	Benzoate 1,2-dioxygenase beta subunit (EC 1.14.12.10)
1	740	339	fig|573.1888.peg.740	benzoate dioxygenase, ferredoxin reductase component	bi	1	888	fig|573.2207.peg.888	100	benzoate dioxygenase, ferredoxin reductase component	bi	1	735	fig|573.2212.peg.735	99.7	benzoate dioxygenase, ferredoxin reductase component	bi	1	4241	fig|573.2215.peg.4241	98.82	benzoate dioxygenase, ferredoxin reductase component	bi	1	2766	fig|573.2241.peg.2766	98.52	benzoate dioxygenase, ferredoxin reductase component
1	741	258	fig|573.1888.peg.741	1,2-dihydroxycyclohexa-3,5-diene-1-carboxylate dehydrogenase (EC 1.3.1.25)	bi	1	887	fig|573.2207.peg.887	100	1,2-dihydroxycyclohexa-3,5-diene-1-carboxylate dehydrogenase (EC 1.3.1.25)	bi	1	736	fig|573.2212.peg.736	100	1,2-dihydroxycyclohexa-3,5-diene-1-carboxylate dehydrogenase (EC 1.3.1.25)	bi	1	4240	fig|573.2215.peg.4240	99.61	1,2-dihydroxycyclohexa-3,5-diene-1-carboxylate dehydrogenase (EC 1.3.1.25)	bi	1	2765	fig|573.2241.peg.2765	99.61	1,2-dihydroxycyclohexa-3,5-diene-1-carboxylate dehydrogenase (EC 1.3.1.25)
1	742	293	fig|573.1888.peg.742	Permease of the drug/metabolite transporter (DMT) superfamily	bi	1	886	fig|573.2207.peg.886	100	Permease of the drug/metabolite transporter (DMT) superfamily	bi	1	737	fig|573.2212.peg.737	100	Permease of the drug/metabolite transporter (DMT) superfamily	bi	1	4239	fig|573.2215.peg.4239	99.32	Permease of the drug/metabolite transporter (DMT) superfamily	bi	1	2764	fig|573.2241.peg.2764	99.66	Permease of the drug/metabolite transporter (DMT) superfamily
1	743	1026	fig|573.1888.peg.743	Formate dehydrogenase N alpha subunit (EC 1.2.1.2) @ selenocysteine-containing	bi	1	884	fig|573.2207.peg.884	99.9	Formate dehydrogenase N alpha subunit (EC 1.2.1.2) @ selenocysteine-containing	bi	1	738	fig|573.2212.peg.738	99.9	Formate dehydrogenase N alpha subunit (EC 1.2.1.2) @ selenocysteine-containing	bi	1	4237	fig|573.2215.peg.4237	99.61	Formate dehydrogenase N alpha subunit (EC 1.2.1.2) @ selenocysteine-containing	bi	1	2763	fig|573.2241.peg.2763	99.71	Formate dehydrogenase N alpha subunit (EC 1.2.1.2) @ selenocysteine-containing
1	744	295	fig|573.1888.peg.744	Formate dehydrogenase N beta subunit (EC 1.2.1.2)	bi	1	882	fig|573.2207.peg.882	100	Formate dehydrogenase N beta subunit (EC 1.2.1.2)	bi	1	741	fig|573.2212.peg.741	100	Formate dehydrogenase N beta subunit (EC 1.2.1.2)	bi	1	4235	fig|573.2215.peg.4235	100	Formate dehydrogenase N beta subunit (EC 1.2.1.2)	bi	1	2762	fig|573.2241.peg.2762	100	Formate dehydrogenase N beta subunit (EC 1.2.1.2)
1	745	220	fig|573.1888.peg.745	Formate dehydrogenase N gamma subunit (EC 1.2.1.2)	bi	1	881	fig|573.2207.peg.881	100	Formate dehydrogenase N gamma subunit (EC 1.2.1.2)	bi	1	742	fig|573.2212.peg.742	100	Formate dehydrogenase N gamma subunit (EC 1.2.1.2)	bi	1	4234	fig|573.2215.peg.4234	98.17	Formate dehydrogenase N gamma subunit (EC 1.2.1.2)	bi	1	2761	fig|573.2241.peg.2761	98.62	Formate dehydrogenase N gamma subunit (EC 1.2.1.2)
1	746	273	fig|573.1888.peg.746	FIG00732265: hypothetical protein	bi	1	880	fig|573.2207.peg.880	100	FIG00732265: hypothetical protein	bi	1	744	fig|573.2212.peg.744	100	FIG00732265: hypothetical protein	bi	1	4232	fig|573.2215.peg.4232	100	FIG00732265: hypothetical protein	bi	1	2759	fig|573.2241.peg.2759	99.63	FIG00732265: hypothetical protein
1	747	147	fig|573.1888.peg.747	Glyoxalase/bleomycin resistance protein/dioxygenase	bi	1	879	fig|573.2207.peg.879	100	Glyoxalase/bleomycin resistance protein/dioxygenase	bi	1	745	fig|573.2212.peg.745	100	Glyoxalase/bleomycin resistance protein/dioxygenase	bi	1	4231	fig|573.2215.peg.4231	100	Glyoxalase/bleomycin resistance protein/dioxygenase	bi	1	2758	fig|573.2241.peg.2758	100	Glyoxalase/bleomycin resistance protein/dioxygenase
1	748	385	fig|573.1888.peg.748	Protein AraJ precursor	bi	1	878	fig|573.2207.peg.878	100	Protein AraJ precursor	bi	1	746	fig|573.2212.peg.746	100	Protein AraJ precursor	bi	1	4230	fig|573.2215.peg.4230	99.48	Protein AraJ precursor	bi	1	2757	fig|573.2241.peg.2757	99.74	Protein AraJ precursor
1	749	364	fig|573.1888.peg.749	Alkylhydroperoxidase AhpD domain protein	bi	1	877	fig|573.2207.peg.877	100	Alkylhydroperoxidase AhpD domain protein	bi	1	747	fig|573.2212.peg.747	100	Alkylhydroperoxidase AhpD domain protein	bi	1	4229	fig|573.2215.peg.4229	99.17	Alkylhydroperoxidase AhpD domain protein	bi	1	2756	fig|573.2241.peg.2756	99.17	Alkylhydroperoxidase AhpD domain protein
1	750	329	fig|573.1888.peg.750	Alkanal monooxygenase alpha chain (EC 1.14.14.3)	bi	1	876	fig|573.2207.peg.876	100	Alkanal monooxygenase alpha chain (EC 1.14.14.3)	bi	1	748	fig|573.2212.peg.748	100	Alkanal monooxygenase alpha chain (EC 1.14.14.3)	bi	1	4228	fig|573.2215.peg.4228	99.09	Alkanal monooxygenase alpha chain (EC 1.14.14.3)	bi	1	2755	fig|573.2241.peg.2755	99.39	Alkanal monooxygenase alpha chain (EC 1.14.14.3)
1	751	539	fig|573.1888.peg.751	ABC transporter ATP-binding protein	bi	1	875	fig|573.2207.peg.875	100	ABC transporter ATP-binding protein	bi	1	749	fig|573.2212.peg.749	100	ABC transporter ATP-binding protein	bi	1	4227	fig|573.2215.peg.4227	99.26	ABC transporter ATP-binding protein	bi	1	2754	fig|573.2241.peg.2754	99.63	ABC transporter ATP-binding protein
1	752	283	fig|573.1888.peg.752	Dipeptide transport system permease protein DppC (TC 3.A.1.5.2)	bi	1	874	fig|573.2207.peg.874	100	Dipeptide transport system permease protein DppC (TC 3.A.1.5.2)	bi	1	750	fig|573.2212.peg.750	100	Dipeptide transport system permease protein DppC (TC 3.A.1.5.2)	bi	1	4226	fig|573.2215.peg.4226	99.65	Dipeptide transport system permease protein DppC (TC 3.A.1.5.2)	bi	1	2753	fig|573.2241.peg.2753	98.58	Dipeptide transport system permease protein DppC (TC 3.A.1.5.2)
1	753	315	fig|573.1888.peg.753	Dipeptide transport system permease protein DppB (TC 3.A.1.5.2)	bi	1	873	fig|573.2207.peg.873	100	Dipeptide transport system permease protein DppB (TC 3.A.1.5.2)	bi	1	751	fig|573.2212.peg.751	100	Dipeptide transport system permease protein DppB (TC 3.A.1.5.2)	bi	1	4225	fig|573.2215.peg.4225	100	Dipeptide transport system permease protein DppB (TC 3.A.1.5.2)	bi	1	2752	fig|573.2241.peg.2752	100	Dipeptide transport system permease protein DppB (TC 3.A.1.5.2)
1	754	541	fig|573.1888.peg.754	ABC-type dipeptide transport system, periplasmic component	bi	1	872	fig|573.2207.peg.872	100	ABC-type dipeptide transport system, periplasmic component	bi	1	752	fig|573.2212.peg.752	100	ABC-type dipeptide transport system, periplasmic component	bi	1	4224	fig|573.2215.peg.4224	99.63	ABC-type dipeptide transport system, periplasmic component	bi	1	2751	fig|573.2241.peg.2751	100	ABC-type dipeptide transport system, periplasmic component
1	755	337	fig|573.1888.peg.755	Alcohol dehydrogenase (EC 1.1.1.1)	bi	1	871	fig|573.2207.peg.871	100	Alcohol dehydrogenase (EC 1.1.1.1)	bi	1	753	fig|573.2212.peg.753	100	Alcohol dehydrogenase (EC 1.1.1.1)	bi	1	4223	fig|573.2215.peg.4223	100	Alcohol dehydrogenase (EC 1.1.1.1)	bi	1	2750	fig|573.2241.peg.2750	100	Alcohol dehydrogenase (EC 1.1.1.1)
1	756	200	fig|573.1888.peg.756	Inorganic pyrophosphatase (EC 3.6.1.1)	bi	1	870	fig|573.2207.peg.870	100	Inorganic pyrophosphatase (EC 3.6.1.1)	bi	1	754	fig|573.2212.peg.754	100	Inorganic pyrophosphatase (EC 3.6.1.1)	bi	1	4222	fig|573.2215.peg.4222	99.5	Inorganic pyrophosphatase (EC 3.6.1.1)	bi	1	2748	fig|573.2241.peg.2748	99.5	Inorganic pyrophosphatase (EC 3.6.1.1)
1	757	318	fig|573.1888.peg.757	Transcriptional regulator, MarR family / Acetyltransferase (GNAT)	bi	1	869	fig|573.2207.peg.869	100	Transcriptional regulator, MarR family / Acetyltransferase (GNAT)	bi	1	755	fig|573.2212.peg.755	100	Transcriptional regulator, MarR family / Acetyltransferase (GNAT)	bi	1	4221	fig|573.2215.peg.4221	99.68	Transcriptional regulator, MarR family / Acetyltransferase (GNAT)	bi	1	2747	fig|573.2241.peg.2747	99.05	Transcriptional regulator, MarR family / Acetyltransferase (GNAT)
1	758	561	fig|573.1888.peg.758	Glutathione-regulated potassium-efflux system ATP-binding protein	bi	1	868	fig|573.2207.peg.868	100	Glutathione-regulated potassium-efflux system ATP-binding protein	bi	1	756	fig|573.2212.peg.756	100	Glutathione-regulated potassium-efflux system ATP-binding protein	bi	1	4220	fig|573.2215.peg.4220	98.93	Glutathione-regulated potassium-efflux system ATP-binding protein	bi	1	2746	fig|573.2241.peg.2746	99.11	Glutathione-regulated potassium-efflux system ATP-binding protein
1	759	236	fig|573.1888.peg.759	putative glycosyltransferase	bi	1	867	fig|573.2207.peg.867	100	putative glycosyltransferase	bi	1	757	fig|573.2212.peg.757	100	putative glycosyltransferase	bi	1	4219	fig|573.2215.peg.4219	92.34	putative glycosyltransferase	bi	1	2744	fig|573.2241.peg.2744	84.28	putative glycosyltransferase
1	760	566	fig|573.1888.peg.760	NAD-dependent malic enzyme (EC 1.1.1.38)	bi	1	866	fig|573.2207.peg.866	100	NAD-dependent malic enzyme (EC 1.1.1.38)	bi	1	758	fig|573.2212.peg.758	99.82	NAD-dependent malic enzyme (EC 1.1.1.38)	bi	1	4218	fig|573.2215.peg.4218	100	NAD-dependent malic enzyme (EC 1.1.1.38)	bi	1	2743	fig|573.2241.peg.2743	99.82	NAD-dependent malic enzyme (EC 1.1.1.38)
1	761	43	fig|573.1888.peg.761	hypothetical protein	bi	1	865	fig|573.2207.peg.865	100	hypothetical protein	bi	1	759	fig|573.2212.peg.759	100	hypothetical protein	bi	1	4217	fig|573.2215.peg.4217	100	hypothetical protein	bi	1	2742	fig|573.2241.peg.2742	100	hypothetical protein
1	762	47	fig|573.1888.peg.762	hypothetical protein	bi	1	864	fig|573.2207.peg.864	100	hypothetical protein	bi	1	760	fig|573.2212.peg.760	100	hypothetical protein	bi	1	4216	fig|573.2215.peg.4216	100	hypothetical protein	bi	1	2741	fig|573.2241.peg.2741	100	hypothetical protein
1	763	284	fig|573.1888.peg.763	Metallo-beta-lactamase superfamily protein PA0057	bi	1	863	fig|573.2207.peg.863	100	Metallo-beta-lactamase superfamily protein PA0057	bi	1	761	fig|573.2212.peg.761	99.65	Metallo-beta-lactamase superfamily protein PA0057	bi	1	4215	fig|573.2215.peg.4215	98.94	Metallo-beta-lactamase superfamily protein PA0057	bi	1	2740	fig|573.2241.peg.2740	98.23	Metallo-beta-lactamase superfamily protein PA0057
1	764	298	fig|573.1888.peg.764	LysR-family transcriptional regulator clustered with PA0057	bi	1	862	fig|573.2207.peg.862	100	LysR-family transcriptional regulator clustered with PA0057	bi	1	762	fig|573.2212.peg.762	99.66	LysR-family transcriptional regulator clustered with PA0057	bi	1	4214	fig|573.2215.peg.4214	98.99	LysR-family transcriptional regulator clustered with PA0057	bi	1	2739	fig|573.2241.peg.2739	98.99	LysR-family transcriptional regulator clustered with PA0057
1	765	82	fig|573.1888.peg.765	FIG00731964: hypothetical protein	bi	1	861	fig|573.2207.peg.861	100	FIG00731964: hypothetical protein	bi	1	763	fig|573.2212.peg.763	100	FIG00731964: hypothetical protein	bi	1	4213	fig|573.2215.peg.4213	98.77	FIG00731964: hypothetical protein	bi	1	2738	fig|573.2241.peg.2738	100	FIG00731964: hypothetical protein
1	766	305	fig|573.1888.peg.766	Oxidoreductase	bi	1	860	fig|573.2207.peg.860	100	Oxidoreductase	bi	1	764	fig|573.2212.peg.764	99.67	Oxidoreductase	bi	1	4212	fig|573.2215.peg.4212	99.67	Oxidoreductase	bi	1	2737	fig|573.2241.peg.2737	99.67	Oxidoreductase
1	767	62	fig|573.1888.peg.767	Conidiation-specific protein 10	bi	1	859	fig|573.2207.peg.859	100	Conidiation-specific protein 10	bi	1	765	fig|573.2212.peg.765	100	Conidiation-specific protein 10	bi	1	4211	fig|573.2215.peg.4211	100	Conidiation-specific protein 10	bi	1	2736	fig|573.2241.peg.2736	100	Conidiation-specific protein 10
1	768	72	fig|573.1888.peg.768	FIG00732017: hypothetical protein	bi	1	858	fig|573.2207.peg.858	100	FIG00732017: hypothetical protein	bi	1	766	fig|573.2212.peg.766	100	FIG00732017: hypothetical protein	bi	1	4210	fig|573.2215.peg.4210	100	FIG00732017: hypothetical protein	bi	1	2735	fig|573.2241.peg.2735	100	FIG00732017: hypothetical protein
1	769	171	fig|573.1888.peg.769	Protein yciE	bi	1	857	fig|573.2207.peg.857	100	Protein yciE	bi	1	767	fig|573.2212.peg.767	100	Protein yciE	bi	1	4209	fig|573.2215.peg.4209	98.81	Protein yciE	bi	1	2734	fig|573.2241.peg.2734	99.4	Protein yciE
1	770	61	fig|573.1888.peg.770	PTS family enzyme IIBC component, cellobiose/salicin/arbutin-specific	bi	1	856	fig|573.2207.peg.856	100	PTS family enzyme IIBC component, cellobiose/salicin/arbutin-specific	bi	1	768	fig|573.2212.peg.768	100	PTS family enzyme IIBC component, cellobiose/salicin/arbutin-specific	bi	1	4208	fig|573.2215.peg.4208	98.33	PTS family enzyme IIBC component, cellobiose/salicin/arbutin-specific	bi	1	2733	fig|573.2241.peg.2733	100	PTS family enzyme IIBC component, cellobiose/salicin/arbutin-specific
1	771	542	fig|573.1888.peg.771	Trehalose synthase (EC 5.4.99.16)	bi	1	855	fig|573.2207.peg.855	100	Trehalose synthase (EC 5.4.99.16)	bi	1	769	fig|573.2212.peg.769	100	Trehalose synthase (EC 5.4.99.16)	bi	1	4207	fig|573.2215.peg.4207	99.82	Trehalose synthase (EC 5.4.99.16)	bi	1	2732	fig|573.2241.peg.2732	99.82	Trehalose synthase (EC 5.4.99.16)
1	772	332	fig|573.1888.peg.772	Short-chain dehydrogenase/reductase SDR	bi	1	854	fig|573.2207.peg.854	100	Short-chain dehydrogenase/reductase SDR	bi	1	770	fig|573.2212.peg.770	100	Short-chain dehydrogenase/reductase SDR	bi	1	4206	fig|573.2215.peg.4206	100	Short-chain dehydrogenase/reductase SDR	bi	1	2731	fig|573.2241.peg.2731	100	Short-chain dehydrogenase/reductase SDR
1	773	149	fig|573.1888.peg.773	FIG00732141: hypothetical protein	bi	1	853	fig|573.2207.peg.853	100	FIG00732141: hypothetical protein	bi	1	771	fig|573.2212.peg.771	100	FIG00732141: hypothetical protein	bi	1	4205	fig|573.2215.peg.4205	100	FIG00732141: hypothetical protein	bi	1	2730	fig|573.2241.peg.2730	100	FIG00732141: hypothetical protein
1	774	168	fig|573.1888.peg.774	FIG00732927: hypothetical protein	bi	1	852	fig|573.2207.peg.852	100	FIG00732927: hypothetical protein	bi	1	772	fig|573.2212.peg.772	100	FIG00732927: hypothetical protein	bi	1	4204	fig|573.2215.peg.4204	100	FIG00732927: hypothetical protein	bi	1	2729	fig|573.2241.peg.2729	98.8	FIG00732927: hypothetical protein
1	775	135	fig|573.1888.peg.775	FIG00638667: hypothetical protein	bi	1	851	fig|573.2207.peg.851	100	FIG00638667: hypothetical protein	bi	1	773	fig|573.2212.peg.773	100	FIG00638667: hypothetical protein	bi	1	4203	fig|573.2215.peg.4203	100	FIG00638667: hypothetical protein	bi	1	2728	fig|573.2241.peg.2728	100	FIG00638667: hypothetical protein
1	776	49	fig|573.1888.peg.776	hypothetical protein	bi	1	850	fig|573.2207.peg.850	100	hypothetical protein	bi	1	774	fig|573.2212.peg.774	100	hypothetical protein	bi	1	4202	fig|573.2215.peg.4202	100	hypothetical protein	bi	1	2727	fig|573.2241.peg.2727	100	hypothetical protein
1	777	144	fig|573.1888.peg.777	Osmotically inducible protein C	bi	1	849	fig|573.2207.peg.849	100	Osmotically inducible protein C	bi	1	775	fig|573.2212.peg.775	100	Osmotically inducible protein C	bi	1	4201	fig|573.2215.peg.4201	100	Osmotically inducible protein C	bi	1	2726	fig|573.2241.peg.2726	100	Osmotically inducible protein C
1	778	290	fig|573.1888.peg.778	FIG00731482: hypothetical protein	bi	1	848	fig|573.2207.peg.848	100	FIG00731482: hypothetical protein	bi	1	776	fig|573.2212.peg.776	100	FIG00731482: hypothetical protein	bi	1	4200	fig|573.2215.peg.4200	100	FIG00731482: hypothetical protein	bi	1	2725	fig|573.2241.peg.2725	99.31	FIG00731482: hypothetical protein
1	779	229	fig|573.1888.peg.779	probable extracellular solute-binding protein	bi	1	847	fig|573.2207.peg.847	100	probable extracellular solute-binding protein	bi	1	777	fig|573.2212.peg.777	100	probable extracellular solute-binding protein	bi	1	4199	fig|573.2215.peg.4199	100	probable extracellular solute-binding protein	bi	1	2724	fig|573.2241.peg.2724	99.12	probable extracellular solute-binding protein
1	780	308	fig|573.1888.peg.780	Cobalt-zinc-cadmium resistance protein	bi	1	846	fig|573.2207.peg.846	100	Cobalt-zinc-cadmium resistance protein	bi	1	778	fig|573.2212.peg.778	100	Cobalt-zinc-cadmium resistance protein	bi	1	4198	fig|573.2215.peg.4198	100	Cobalt-zinc-cadmium resistance protein	bi	1	2723	fig|573.2241.peg.2723	98.05	Cobalt-zinc-cadmium resistance protein
1	781	47	fig|573.1888.peg.781	hypothetical protein	bi	1	845	fig|573.2207.peg.845	100	hypothetical protein	bi	1	779	fig|573.2212.peg.779	100	hypothetical protein	bi	1	4197	fig|573.2215.peg.4197	100	hypothetical protein	-				0
1	782	306	fig|573.1888.peg.782	FIG00732527: hypothetical protein	bi	1	844	fig|573.2207.peg.844	100	FIG00732527: hypothetical protein	bi	1	780	fig|573.2212.peg.780	100	FIG00732527: hypothetical protein	bi	1	4196	fig|573.2215.peg.4196	100	FIG00732527: hypothetical protein	bi	1	2722	fig|573.2241.peg.2722	99.67	FIG00732527: hypothetical protein
1	783	767	fig|573.1888.peg.783	Putative formate dehydrogenase oxidoreductase protein	bi	1	843	fig|573.2207.peg.843	100	Putative formate dehydrogenase oxidoreductase protein	bi	1	781	fig|573.2212.peg.781	99.87	Putative formate dehydrogenase oxidoreductase protein	bi	1	4195	fig|573.2215.peg.4195	99.87	Putative formate dehydrogenase oxidoreductase protein	bi	1	2721	fig|573.2241.peg.2721	99.48	Putative formate dehydrogenase oxidoreductase protein
1	784	294	fig|573.1888.peg.784	Transcriptional regulator, LysR family	bi	1	842	fig|573.2207.peg.842	100	Transcriptional regulator, LysR family	bi	1	782	fig|573.2212.peg.782	100	Transcriptional regulator, LysR family	bi	1	4194	fig|573.2215.peg.4194	100	Transcriptional regulator, LysR family	bi	1	2720	fig|573.2241.peg.2720	99.66	Transcriptional regulator, LysR family
1	785	412	fig|573.1888.peg.785	PTS system, cellobiose-specific IIC component (EC 2.7.1.69)	bi	1	841	fig|573.2207.peg.841	100	PTS system, cellobiose-specific IIC component (EC 2.7.1.69)	bi	1	783	fig|573.2212.peg.783	100	PTS system, cellobiose-specific IIC component (EC 2.7.1.69)	bi	1	4193	fig|573.2215.peg.4193	100	PTS system, cellobiose-specific IIC component (EC 2.7.1.69)	bi	1	2719	fig|573.2241.peg.2719	99.51	PTS system, cellobiose-specific IIC component (EC 2.7.1.69)
1	786	871	fig|573.1888.peg.786	Alfa-L-rhamnosidase (EC 3.2.1.40)	bi	1	840	fig|573.2207.peg.840	100	Alfa-L-rhamnosidase (EC 3.2.1.40)	bi	1	784	fig|573.2212.peg.784	99.89	Alfa-L-rhamnosidase (EC 3.2.1.40)	bi	1	4192	fig|573.2215.peg.4192	99.89	Alfa-L-rhamnosidase (EC 3.2.1.40)	bi	1	2718	fig|573.2241.peg.2718	98.85	Alfa-L-rhamnosidase (EC 3.2.1.40)
1	787	315	fig|573.1888.peg.787	Transcriptional regulator of rhamnose utilization, AraC family	bi	1	839	fig|573.2207.peg.839	100	Transcriptional regulator of rhamnose utilization, AraC family	bi	1	785	fig|573.2212.peg.785	100	Transcriptional regulator of rhamnose utilization, AraC family	bi	1	4191	fig|573.2215.peg.4191	100	Transcriptional regulator of rhamnose utilization, AraC family	bi	1	2717	fig|573.2241.peg.2717	100	Transcriptional regulator of rhamnose utilization, AraC family
1	788	359	fig|573.1888.peg.788	hypothetical protein	bi	1	838	fig|573.2207.peg.838	100	hypothetical protein	bi	1	786	fig|573.2212.peg.786	100	hypothetical protein	bi	1	4190	fig|573.2215.peg.4190	100	hypothetical protein	bi	1	2715	fig|573.2241.peg.2715	100	hypothetical protein
1	789	322	fig|573.1888.peg.789	FIG01201305: hypothetical protein	bi	1	837	fig|573.2207.peg.837	100	FIG01201305: hypothetical protein	bi	1	787	fig|573.2212.peg.787	100	FIG01201305: hypothetical protein	bi	1	4189	fig|573.2215.peg.4189	100	FIG01201305: hypothetical protein	bi	1	2714	fig|573.2241.peg.2714	99.69	FIG01201305: hypothetical protein
1	790	108	fig|573.1888.peg.790	PTS system, cellobiose-specific IIB component (EC 2.7.1.69)	bi	1	836	fig|573.2207.peg.836	100	PTS system, cellobiose-specific IIB component (EC 2.7.1.69)	bi	1	788	fig|573.2212.peg.788	100	PTS system, cellobiose-specific IIB component (EC 2.7.1.69)	bi	1	4188	fig|573.2215.peg.4188	100	PTS system, cellobiose-specific IIB component (EC 2.7.1.69)	bi	1	2713	fig|573.2241.peg.2713	100	PTS system, cellobiose-specific IIB component (EC 2.7.1.69)
1	791	105	fig|573.1888.peg.791	PTS system, cellobiose-specific IIA component (EC 2.7.1.69)	bi	1	835	fig|573.2207.peg.835	100	PTS system, cellobiose-specific IIA component (EC 2.7.1.69)	bi	1	789	fig|573.2212.peg.789	100	PTS system, cellobiose-specific IIA component (EC 2.7.1.69)	bi	1	4187	fig|573.2215.peg.4187	100	PTS system, cellobiose-specific IIA component (EC 2.7.1.69)	bi	1	2712	fig|573.2241.peg.2712	100	PTS system, cellobiose-specific IIA component (EC 2.7.1.69)
1	792	469	fig|573.1888.peg.792	Transporter, MFS superfamily	bi	1	834	fig|573.2207.peg.834	100	Transporter, MFS superfamily	bi	1	790	fig|573.2212.peg.790	100	Transporter, MFS superfamily	bi	1	4186	fig|573.2215.peg.4186	100	Transporter, MFS superfamily	bi	1	2711	fig|573.2241.peg.2711	99.79	Transporter, MFS superfamily
1	793	227	fig|573.1888.peg.793	Mg(2+) transport ATPase protein C	bi	1	833	fig|573.2207.peg.833	100	Mg(2+) transport ATPase protein C	bi	1	791	fig|573.2212.peg.791	100	Mg(2+) transport ATPase protein C	bi	1	4185	fig|573.2215.peg.4185	100	Mg(2+) transport ATPase protein C	bi	1	2710	fig|573.2241.peg.2710	99.56	Mg(2+) transport ATPase protein C
1	794	339	fig|573.1888.peg.794	ATPase component BioM of energizing module of biotin ECF transporter	bi	1	832	fig|573.2207.peg.832	100	ATPase component BioM of energizing module of biotin ECF transporter	bi	1	792	fig|573.2212.peg.792	99.7	ATPase component BioM of energizing module of biotin ECF transporter	bi	1	4184	fig|573.2215.peg.4184	99.7	ATPase component BioM of energizing module of biotin ECF transporter	bi	1	2709	fig|573.2241.peg.2709	99.11	ATPase component BioM of energizing module of biotin ECF transporter
1	795	726	fig|573.1888.peg.795	Catalase (EC 1.11.1.6) / Peroxidase (EC 1.11.1.7)	bi	1	831	fig|573.2207.peg.831	100	Catalase (EC 1.11.1.6) / Peroxidase (EC 1.11.1.7)	bi	1	793	fig|573.2212.peg.793	100	Catalase (EC 1.11.1.6) / Peroxidase (EC 1.11.1.7)	bi	1	4183	fig|573.2215.peg.4183	100	Catalase (EC 1.11.1.6) / Peroxidase (EC 1.11.1.7)	bi	1	2708	fig|573.2241.peg.2708	99.86	Catalase (EC 1.11.1.6) / Peroxidase (EC 1.11.1.7)
1	796	211	fig|573.1888.peg.796	Putative threonine efflux protein	bi	1	830	fig|573.2207.peg.830	100	Putative threonine efflux protein	bi	1	794	fig|573.2212.peg.794	100	Putative threonine efflux protein	bi	1	4182	fig|573.2215.peg.4182	100	Putative threonine efflux protein	uni	1	2628	fig|573.2241.peg.2628	32.39	Putative threonine efflux protein
1	797	637	fig|573.1888.peg.797	Cell division protein FtsI [Peptidoglycan synthetase] (EC 2.4.1.129)	bi	1	829	fig|573.2207.peg.829	100	Cell division protein FtsI [Peptidoglycan synthetase] (EC 2.4.1.129)	bi	1	795	fig|573.2212.peg.795	100	Cell division protein FtsI [Peptidoglycan synthetase] (EC 2.4.1.129)	bi	1	4181	fig|573.2215.peg.4181	100	Cell division protein FtsI [Peptidoglycan synthetase] (EC 2.4.1.129)	bi	1	2704	fig|573.2241.peg.2704	99.68	Cell division protein FtsI [Peptidoglycan synthetase] (EC 2.4.1.129)
1	798	246	fig|573.1888.peg.798	GMP synthase [glutamine-hydrolyzing] (EC 6.3.5.2)	bi	1	828	fig|573.2207.peg.828	100	GMP synthase [glutamine-hydrolyzing] (EC 6.3.5.2)	bi	1	796	fig|573.2212.peg.796	100	GMP synthase [glutamine-hydrolyzing] (EC 6.3.5.2)	bi	1	4180	fig|573.2215.peg.4180	100	GMP synthase [glutamine-hydrolyzing] (EC 6.3.5.2)	bi	1	2703	fig|573.2241.peg.2703	98.78	GMP synthase [glutamine-hydrolyzing] (EC 6.3.5.2)
1	799	762	fig|573.1888.peg.799	Coenzyme PQQ synthesis protein F	bi	1	827	fig|573.2207.peg.827	100	Coenzyme PQQ synthesis protein F	bi	1	797	fig|573.2212.peg.797	100	Coenzyme PQQ synthesis protein F	bi	1	4179	fig|573.2215.peg.4179	100	Coenzyme PQQ synthesis protein F	bi	1	2702	fig|573.2241.peg.2702	98.95	Coenzyme PQQ synthesis protein F
1	800	381	fig|573.1888.peg.800	Coenzyme PQQ synthesis protein E	bi	1	826	fig|573.2207.peg.826	100	Coenzyme PQQ synthesis protein E	bi	1	798	fig|573.2212.peg.798	100	Coenzyme PQQ synthesis protein E	bi	1	4178	fig|573.2215.peg.4178	100	Coenzyme PQQ synthesis protein E	bi	1	2701	fig|573.2241.peg.2701	98.95	Coenzyme PQQ synthesis protein E
1	801	93	fig|573.1888.peg.801	Coenzyme PQQ synthesis protein D	bi	1	825	fig|573.2207.peg.825	100	Coenzyme PQQ synthesis protein D	bi	1	799	fig|573.2212.peg.799	100	Coenzyme PQQ synthesis protein D	bi	1	4177	fig|573.2215.peg.4177	100	Coenzyme PQQ synthesis protein D	bi	1	2700	fig|573.2241.peg.2700	100	Coenzyme PQQ synthesis protein D
1	802	252	fig|573.1888.peg.802	Coenzyme PQQ synthesis protein C	bi	1	824	fig|573.2207.peg.824	100	Coenzyme PQQ synthesis protein C	bi	1	800	fig|573.2212.peg.800	100	Coenzyme PQQ synthesis protein C	bi	1	4176	fig|573.2215.peg.4176	100	Coenzyme PQQ synthesis protein C	bi	1	2699	fig|573.2241.peg.2699	100	Coenzyme PQQ synthesis protein C
1	803	309	fig|573.1888.peg.803	Coenzyme PQQ synthesis protein B	bi	1	823	fig|573.2207.peg.823	100	Coenzyme PQQ synthesis protein B	bi	1	801	fig|573.2212.peg.801	99.68	Coenzyme PQQ synthesis protein B	bi	1	4175	fig|573.2215.peg.4175	99.68	Coenzyme PQQ synthesis protein B	bi	1	2698	fig|573.2241.peg.2698	99.35	Coenzyme PQQ synthesis protein B
1	804	340	fig|573.1888.peg.804	Microsomal dipeptidase (EC 3.4.13.19)	bi	1	822	fig|573.2207.peg.822	100	Microsomal dipeptidase (EC 3.4.13.19)	bi	1	802	fig|573.2212.peg.802	100	Microsomal dipeptidase (EC 3.4.13.19)	bi	1	4174	fig|573.2215.peg.4174	100	Microsomal dipeptidase (EC 3.4.13.19)	bi	1	2697	fig|573.2241.peg.2697	97.94	Microsomal dipeptidase (EC 3.4.13.19)
1	805	331	fig|573.1888.peg.805	Epoxide hydrolase (EC 3.3.2.9)	bi	1	821	fig|573.2207.peg.821	100	Epoxide hydrolase (EC 3.3.2.9)	bi	1	803	fig|573.2212.peg.803	100	Epoxide hydrolase (EC 3.3.2.9)	bi	1	4173	fig|573.2215.peg.4173	100	Epoxide hydrolase (EC 3.3.2.9)	bi	1	2696	fig|573.2241.peg.2696	100	Epoxide hydrolase (EC 3.3.2.9)
1	806	247	fig|573.1888.peg.806	putative two-component response regulator transcriptional regulatory protein	bi	1	820	fig|573.2207.peg.820	100	putative two-component response regulator transcriptional regulatory protein	bi	1	804	fig|573.2212.peg.804	100	putative two-component response regulator transcriptional regulatory protein	bi	1	4172	fig|573.2215.peg.4172	100	putative two-component response regulator transcriptional regulatory protein	bi	1	2695	fig|573.2241.peg.2695	99.59	putative two-component response regulator transcriptional regulatory protein
1	807	448	fig|573.1888.peg.807	sensor histidine kinase	bi	1	819	fig|573.2207.peg.819	100	sensor histidine kinase	bi	1	805	fig|573.2212.peg.805	100	sensor histidine kinase	bi	1	4171	fig|573.2215.peg.4171	100	sensor histidine kinase	bi	1	2694	fig|573.2241.peg.2694	99.33	sensor histidine kinase
1	808	397	fig|573.1888.peg.808	FIG00731668: hypothetical protein	bi	1	818	fig|573.2207.peg.818	100	FIG00731668: hypothetical protein	bi	1	806	fig|573.2212.peg.806	99.75	FIG00731668: hypothetical protein	bi	1	4170	fig|573.2215.peg.4170	99.75	FIG00731668: hypothetical protein	bi	1	2693	fig|573.2241.peg.2693	99.24	FIG00731668: hypothetical protein
1	809	298	fig|573.1888.peg.809	Transcriptional regulator	bi	1	817	fig|573.2207.peg.817	100	Transcriptional regulator	bi	1	807	fig|573.2212.peg.807	100	Transcriptional regulator	bi	1	4169	fig|573.2215.peg.4169	100	Transcriptional regulator	bi	1	2692	fig|573.2241.peg.2692	98.32	Transcriptional regulator
1	810	494	fig|573.1888.peg.810	L-2,4-diaminobutyrate decarboxylase (EC 4.1.1.86)	bi	1	816	fig|573.2207.peg.816	100	L-2,4-diaminobutyrate decarboxylase (EC 4.1.1.86)	bi	1	808	fig|573.2212.peg.808	100	L-2,4-diaminobutyrate decarboxylase (EC 4.1.1.86)	bi	1	4168	fig|573.2215.peg.4168	100	L-2,4-diaminobutyrate decarboxylase (EC 4.1.1.86)	bi	1	2691	fig|573.2241.peg.2691	100	L-2,4-diaminobutyrate decarboxylase (EC 4.1.1.86)
1	811	462	fig|573.1888.peg.811	Diaminobutyrate--2-oxoglutarate aminotransferase (EC 2.6.1.76)	bi	1	815	fig|573.2207.peg.815	100	Diaminobutyrate--2-oxoglutarate aminotransferase (EC 2.6.1.76)	bi	1	809	fig|573.2212.peg.809	100	Diaminobutyrate--2-oxoglutarate aminotransferase (EC 2.6.1.76)	bi	1	4167	fig|573.2215.peg.4167	100	Diaminobutyrate--2-oxoglutarate aminotransferase (EC 2.6.1.76)	bi	1	2690	fig|573.2241.peg.2690	99.78	Diaminobutyrate--2-oxoglutarate aminotransferase (EC 2.6.1.76)
1	812	312	fig|573.1888.peg.812	Hydroxymethylpyrimidine ABC transporter, substrate-binding component	bi	1	814	fig|573.2207.peg.814	100	Hydroxymethylpyrimidine ABC transporter, substrate-binding component	bi	1	810	fig|573.2212.peg.810	100	Hydroxymethylpyrimidine ABC transporter, substrate-binding component	bi	1	4166	fig|573.2215.peg.4166	100	Hydroxymethylpyrimidine ABC transporter, substrate-binding component	bi	1	2689	fig|573.2241.peg.2689	99.68	Hydroxymethylpyrimidine ABC transporter, substrate-binding component
1	813	247	fig|573.1888.peg.813	Hydroxymethylpyrimidine ABC transporter, transmembrane component	bi	1	813	fig|573.2207.peg.813	100	Hydroxymethylpyrimidine ABC transporter, transmembrane component	bi	1	811	fig|573.2212.peg.811	100	Hydroxymethylpyrimidine ABC transporter, transmembrane component	bi	1	4165	fig|573.2215.peg.4165	100	Hydroxymethylpyrimidine ABC transporter, transmembrane component	bi	1	2688	fig|573.2241.peg.2688	99.59	Hydroxymethylpyrimidine ABC transporter, transmembrane component
1	814	243	fig|573.1888.peg.814	ABC transporter ATP-binding protein	bi	1	812	fig|573.2207.peg.812	100	ABC transporter ATP-binding protein	bi	1	812	fig|573.2212.peg.812	100	ABC transporter ATP-binding protein	bi	1	4164	fig|573.2215.peg.4164	100	ABC transporter ATP-binding protein	bi	1	2687	fig|573.2241.peg.2687	100	ABC transporter ATP-binding protein
1	815	232	fig|573.1888.peg.815	Thiaminase II (EC 3.5.99.2)	bi	1	811	fig|573.2207.peg.811	100	Thiaminase II (EC 3.5.99.2)	bi	1	813	fig|573.2212.peg.813	99.57	Thiaminase II (EC 3.5.99.2)	bi	1	4163	fig|573.2215.peg.4163	100	Thiaminase II (EC 3.5.99.2)	bi	1	2686	fig|573.2241.peg.2686	98.7	Thiaminase II (EC 3.5.99.2)
1	816	369	fig|573.1888.peg.816	corresponds to STY3950 from Accession AL513382: Salmonella typhi CT18	bi	1	810	fig|573.2207.peg.810	100	corresponds to STY3950 from Accession AL513382: Salmonella typhi CT18	bi	1	814	fig|573.2212.peg.814	100	corresponds to STY3950 from Accession AL513382: Salmonella typhi CT18	bi	1	4162	fig|573.2215.peg.4162	99.73	corresponds to STY3950 from Accession AL513382: Salmonella typhi CT18	bi	1	2685	fig|573.2241.peg.2685	99.43	corresponds to STY3950 from Accession AL513382: Salmonella typhi CT18
1	817	391	fig|573.1888.peg.817	Nucleoside-diphosphate-sugar epimerases	bi	1	809	fig|573.2207.peg.809	100	Nucleoside-diphosphate-sugar epimerases	bi	1	815	fig|573.2212.peg.815	100	Nucleoside-diphosphate-sugar epimerases	bi	1	4161	fig|573.2215.peg.4161	100	Nucleoside-diphosphate-sugar epimerases	bi	1	2684	fig|573.2241.peg.2684	98.21	Nucleoside-diphosphate-sugar epimerases
1	818	308	fig|573.1888.peg.818	Inosose dehydratase (EC 4.2.1.44)	bi	1	808	fig|573.2207.peg.808	100	Inosose dehydratase (EC 4.2.1.44)	bi	1	816	fig|573.2212.peg.816	100	Inosose dehydratase (EC 4.2.1.44)	bi	1	4160	fig|573.2215.peg.4160	100	Inosose dehydratase (EC 4.2.1.44)	bi	1	2683	fig|573.2241.peg.2683	98.7	Inosose dehydratase (EC 4.2.1.44)
1	819	347	fig|573.1888.peg.819	Ribose operon repressor	bi	1	807	fig|573.2207.peg.807	100	Ribose operon repressor	bi	1	817	fig|573.2212.peg.817	100	Ribose operon repressor	bi	1	4159	fig|573.2215.peg.4159	100	Ribose operon repressor	bi	1	2682	fig|573.2241.peg.2682	99.42	Ribose operon repressor
1	820	419	fig|573.1888.peg.820	GGDEF family protein	bi	1	806	fig|573.2207.peg.806	100	GGDEF family protein	bi	1	818	fig|573.2212.peg.818	99.76	GGDEF family protein	bi	1	4158	fig|573.2215.peg.4158	99.76	GGDEF family protein	bi	1	2681	fig|573.2241.peg.2681	99.04	GGDEF family protein
1	821	437	fig|573.1888.peg.821	Guanine deaminase (EC 3.5.4.3)	bi	1	805	fig|573.2207.peg.805	100	Guanine deaminase (EC 3.5.4.3)	bi	1	819	fig|573.2212.peg.819	100	Guanine deaminase (EC 3.5.4.3)	bi	1	4157	fig|573.2215.peg.4157	100	Guanine deaminase (EC 3.5.4.3)	bi	1	2680	fig|573.2241.peg.2680	99.31	Guanine deaminase (EC 3.5.4.3)
1	822	499	fig|573.1888.peg.822	Cytosine/purine/uracil/thiamine/allantoin permease family protein	bi	1	804	fig|573.2207.peg.804	100	Cytosine/purine/uracil/thiamine/allantoin permease family protein	bi	1	820	fig|573.2212.peg.820	100	Cytosine/purine/uracil/thiamine/allantoin permease family protein	bi	1	4156	fig|573.2215.peg.4156	100	Cytosine/purine/uracil/thiamine/allantoin permease family protein	bi	1	2679	fig|573.2241.peg.2679	99	Cytosine/purine/uracil/thiamine/allantoin permease family protein
1	823	239	fig|573.1888.peg.823	Transcriptional regulator, GntR family	bi	1	803	fig|573.2207.peg.803	100	Transcriptional regulator, GntR family	bi	1	821	fig|573.2212.peg.821	100	Transcriptional regulator, GntR family	bi	1	4155	fig|573.2215.peg.4155	100	Transcriptional regulator, GntR family	bi	1	2678	fig|573.2241.peg.2678	100	Transcriptional regulator, GntR family
1	824	248	fig|573.1888.peg.824	Allantoin racemase (EC 5.1.99.3)	bi	1	802	fig|573.2207.peg.802	100	Allantoin racemase (EC 5.1.99.3)	bi	1	822	fig|573.2212.peg.822	100	Allantoin racemase (EC 5.1.99.3)	bi	1	4154	fig|573.2215.peg.4154	100	Allantoin racemase (EC 5.1.99.3)	bi	1	2677	fig|573.2241.peg.2677	99.6	Allantoin racemase (EC 5.1.99.3)
1	825	311	fig|573.1888.peg.825	Uricase (urate oxidase) (EC 1.7.3.3)	bi	1	801	fig|573.2207.peg.801	100	Uricase (urate oxidase) (EC 1.7.3.3)	bi	1	823	fig|573.2212.peg.823	100	Uricase (urate oxidase) (EC 1.7.3.3)	bi	1	4153	fig|573.2215.peg.4153	100	Uricase (urate oxidase) (EC 1.7.3.3)	bi	1	2676	fig|573.2241.peg.2676	99.28	Uricase (urate oxidase) (EC 1.7.3.3)
1	826	264	fig|573.1888.peg.826	Integral membrane protein	bi	1	800	fig|573.2207.peg.800	100	Integral membrane protein	bi	1	824	fig|573.2212.peg.824	100	Integral membrane protein	bi	1	4152	fig|573.2215.peg.4152	100	Integral membrane protein	bi	1	2675	fig|573.2241.peg.2675	99.62	Integral membrane protein
1	827	256	fig|573.1888.peg.827	Transcriptional regulator, AraC family	bi	1	799	fig|573.2207.peg.799	100	Transcriptional regulator, AraC family	bi	1	825	fig|573.2212.peg.825	99.39	Transcriptional regulator, AraC family	bi	1	4151	fig|573.2215.peg.4151	100	Transcriptional regulator, AraC family	bi	1	2674	fig|573.2241.peg.2674	99.61	Transcriptional regulator, AraC family
1	828	75	fig|573.1888.peg.828	FIG00732296: hypothetical protein	bi	1	798	fig|573.2207.peg.798	100	FIG00732296: hypothetical protein	bi	1	826	fig|573.2212.peg.826	100	FIG00732296: hypothetical protein	bi	1	4150	fig|573.2215.peg.4150	100	FIG00732296: hypothetical protein	bi	1	2673	fig|573.2241.peg.2673	94.59	FIG00732296: hypothetical protein
1	829	242	fig|573.1888.peg.829	putative glutamine amidotransferase class-I	bi	1	796	fig|573.2207.peg.796	100	putative glutamine amidotransferase class-I	bi	1	827	fig|573.2212.peg.827	100	putative glutamine amidotransferase class-I	bi	1	4149	fig|573.2215.peg.4149	100	putative glutamine amidotransferase class-I	bi	1	2669	fig|573.2241.peg.2669	98.34	putative glutamine amidotransferase class-I
1	830	59	fig|573.1888.peg.830	FIG00732621: hypothetical protein	bi	1	795	fig|573.2207.peg.795	100	FIG00732621: hypothetical protein	bi	1	828	fig|573.2212.peg.828	100	FIG00732621: hypothetical protein	bi	1	4147	fig|573.2215.peg.4147	100	FIG00732621: hypothetical protein	bi	1	2667	fig|573.2241.peg.2667	100	FIG00732621: hypothetical protein
1	831	48	fig|573.1888.peg.831	hypothetical protein	bi	1	794	fig|573.2207.peg.794	100	hypothetical protein	bi	1	829	fig|573.2212.peg.829	100	hypothetical protein	bi	1	4146	fig|573.2215.peg.4146	100	hypothetical protein	bi	1	2666	fig|573.2241.peg.2666	100	hypothetical protein
1	832	56	fig|573.1888.peg.832	FIG123062: hypothetical protein	bi	1	793	fig|573.2207.peg.793	100	FIG123062: hypothetical protein	bi	1	830	fig|573.2212.peg.830	100	FIG123062: hypothetical protein	bi	1	4145	fig|573.2215.peg.4145	100	FIG123062: hypothetical protein	bi	1	2665	fig|573.2241.peg.2665	100	FIG123062: hypothetical protein
1	833	425	fig|573.1888.peg.833	3-oxoacyl-[acyl-carrier-protein] synthase, KASII (EC 2.3.1.179)	bi	1	792	fig|573.2207.peg.792	100	3-oxoacyl-[acyl-carrier-protein] synthase, KASII (EC 2.3.1.179)	bi	1	831	fig|573.2212.peg.831	100	3-oxoacyl-[acyl-carrier-protein] synthase, KASII (EC 2.3.1.179)	bi	1	4144	fig|573.2215.peg.4144	100	3-oxoacyl-[acyl-carrier-protein] synthase, KASII (EC 2.3.1.179)	bi	1	2664	fig|573.2241.peg.2664	99.29	3-oxoacyl-[acyl-carrier-protein] synthase, KASII (EC 2.3.1.179)
1	834	521	fig|573.1888.peg.834	Inner membrane component of tripartite multidrug resistance system	bi	1	791	fig|573.2207.peg.791	100	Inner membrane component of tripartite multidrug resistance system	bi	1	832	fig|573.2212.peg.832	100	Inner membrane component of tripartite multidrug resistance system	bi	1	4143	fig|573.2215.peg.4143	100	Inner membrane component of tripartite multidrug resistance system	bi	1	2663	fig|573.2241.peg.2663	99.62	Inner membrane component of tripartite multidrug resistance system
1	835	348	fig|573.1888.peg.835	Membrane fusion component of tripartite multidrug resistance system	bi	1	790	fig|573.2207.peg.790	100	Membrane fusion component of tripartite multidrug resistance system	bi	1	833	fig|573.2212.peg.833	100	Membrane fusion component of tripartite multidrug resistance system	bi	1	4142	fig|573.2215.peg.4142	100	Membrane fusion component of tripartite multidrug resistance system	bi	1	2662	fig|573.2241.peg.2662	99.42	Membrane fusion component of tripartite multidrug resistance system
1	836	186	fig|573.1888.peg.836	Transcriptional regulator, HxlR family	bi	1	789	fig|573.2207.peg.789	100	Transcriptional regulator, HxlR family	bi	1	834	fig|573.2212.peg.834	100	Transcriptional regulator, HxlR family	bi	1	4141	fig|573.2215.peg.4141	100	Transcriptional regulator, HxlR family	bi	1	2661	fig|573.2241.peg.2661	99.46	Transcriptional regulator, HxlR family
1	837	373	fig|573.1888.peg.837	Aspartate-semialdehyde dehydrogenase (EC 1.2.1.11)	bi	1	788	fig|573.2207.peg.788	100	Aspartate-semialdehyde dehydrogenase (EC 1.2.1.11)	bi	1	835	fig|573.2212.peg.835	100	Aspartate-semialdehyde dehydrogenase (EC 1.2.1.11)	bi	1	4140	fig|573.2215.peg.4140	99.37	Aspartate-semialdehyde dehydrogenase (EC 1.2.1.11)	bi	1	2660	fig|573.2241.peg.2660	97.31	Aspartate-semialdehyde dehydrogenase (EC 1.2.1.11)
1	838	141	fig|573.1888.peg.838	PhnO protein	bi	1	787	fig|573.2207.peg.787	100	PhnO protein	bi	1	836	fig|573.2212.peg.836	100	PhnO protein	bi	1	4136	fig|573.2215.peg.4136	100	PhnO protein	bi	1	2659	fig|573.2241.peg.2659	99.29	PhnO protein
1	839	129	fig|573.1888.peg.839	FIG00441296: hypothetical protein	bi	1	786	fig|573.2207.peg.786	100	FIG00441296: hypothetical protein	bi	1	837	fig|573.2212.peg.837	100	FIG00441296: hypothetical protein	bi	1	4135	fig|573.2215.peg.4135	100	FIG00441296: hypothetical protein	bi	1	2658	fig|573.2241.peg.2658	100	FIG00441296: hypothetical protein
1	840	466	fig|573.1888.peg.840	Asp-tRNAAsn/Glu-tRNAGln amidotransferase A subunit and related amidases	bi	1	785	fig|573.2207.peg.785	100	Asp-tRNAAsn/Glu-tRNAGln amidotransferase A subunit and related amidases	bi	1	838	fig|573.2212.peg.838	100	Asp-tRNAAsn/Glu-tRNAGln amidotransferase A subunit and related amidases	bi	1	4134	fig|573.2215.peg.4134	100	Asp-tRNAAsn/Glu-tRNAGln amidotransferase A subunit and related amidases	bi	1	2657	fig|573.2241.peg.2657	99.78	Asp-tRNAAsn/Glu-tRNAGln amidotransferase A subunit and related amidases
1	841	62	fig|573.1888.peg.841	FIG00731385: hypothetical protein	bi	1	784	fig|573.2207.peg.784	100	FIG00731385: hypothetical protein	bi	1	839	fig|573.2212.peg.839	100	FIG00731385: hypothetical protein	bi	1	4133	fig|573.2215.peg.4133	100	FIG00731385: hypothetical protein	bi	1	2656	fig|573.2241.peg.2656	98.36	FIG00731385: hypothetical protein
1	842	529	fig|573.1888.peg.842	Gamma-glutamyltranspeptidase (EC 2.3.2.2)	bi	1	783	fig|573.2207.peg.783	100	Gamma-glutamyltranspeptidase (EC 2.3.2.2)	bi	1	840	fig|573.2212.peg.840	100	Gamma-glutamyltranspeptidase (EC 2.3.2.2)	bi	1	4132	fig|573.2215.peg.4132	100	Gamma-glutamyltranspeptidase (EC 2.3.2.2)	bi	1	2655	fig|573.2241.peg.2655	98.48	Gamma-glutamyltranspeptidase (EC 2.3.2.2)
1	843	280	fig|573.1888.peg.843	Putative rpiR-family transcriptional regulatory protein	bi	1	782	fig|573.2207.peg.782	100	Putative rpiR-family transcriptional regulatory protein	bi	1	841	fig|573.2212.peg.841	100	Putative rpiR-family transcriptional regulatory protein	bi	1	4131	fig|573.2215.peg.4131	100	Putative rpiR-family transcriptional regulatory protein	bi	1	2654	fig|573.2241.peg.2654	99.64	Putative rpiR-family transcriptional regulatory protein
1	844	262	fig|573.1888.peg.844	ABC-type amino acid transport/signal transduction systems, periplasmic component/domain	bi	1	781	fig|573.2207.peg.781	100	ABC-type amino acid transport/signal transduction systems, periplasmic component/domain	bi	1	842	fig|573.2212.peg.842	100	ABC-type amino acid transport/signal transduction systems, periplasmic component/domain	bi	1	4130	fig|573.2215.peg.4130	100	ABC-type amino acid transport/signal transduction systems, periplasmic component/domain	bi	1	2653	fig|573.2241.peg.2653	100	ABC-type amino acid transport/signal transduction systems, periplasmic component/domain
1	845	222	fig|573.1888.peg.845	amino acid ABC transporter, permease protein	bi	1	780	fig|573.2207.peg.780	100	amino acid ABC transporter, permease protein	bi	1	843	fig|573.2212.peg.843	100	amino acid ABC transporter, permease protein	bi	1	4129	fig|573.2215.peg.4129	100	amino acid ABC transporter, permease protein	bi	1	2652	fig|573.2241.peg.2652	100	amino acid ABC transporter, permease protein
1	846	219	fig|573.1888.peg.846	Putative amino acid ABC transporter, permease protein	bi	1	779	fig|573.2207.peg.779	100	Putative amino acid ABC transporter, permease protein	bi	1	844	fig|573.2212.peg.844	100	Putative amino acid ABC transporter, permease protein	bi	1	4128	fig|573.2215.peg.4128	100	Putative amino acid ABC transporter, permease protein	bi	1	2651	fig|573.2241.peg.2651	99.54	Putative amino acid ABC transporter, permease protein
1	847	246	fig|573.1888.peg.847	Glutamate transport ATP-binding protein	bi	1	778	fig|573.2207.peg.778	100	Glutamate transport ATP-binding protein	bi	1	845	fig|573.2212.peg.845	100	Glutamate transport ATP-binding protein	bi	1	4127	fig|573.2215.peg.4127	100	Glutamate transport ATP-binding protein	bi	1	2650	fig|573.2241.peg.2650	99.59	Glutamate transport ATP-binding protein
1	848	414	fig|573.1888.peg.848	Serine--pyruvate aminotransferase (EC 2.6.1.51) / L-alanine:glyoxylate aminotransferase (EC 2.6.1.44)	bi	1	777	fig|573.2207.peg.777	100	Serine--pyruvate aminotransferase (EC 2.6.1.51) / L-alanine:glyoxylate aminotransferase (EC 2.6.1.44)	bi	1	846	fig|573.2212.peg.846	99.76	Serine--pyruvate aminotransferase (EC 2.6.1.51) / L-alanine:glyoxylate aminotransferase (EC 2.6.1.44)	bi	1	4126	fig|573.2215.peg.4126	100	Serine--pyruvate aminotransferase (EC 2.6.1.51) / L-alanine:glyoxylate aminotransferase (EC 2.6.1.44)	bi	1	2649	fig|573.2241.peg.2649	100	Serine--pyruvate aminotransferase (EC 2.6.1.51) / L-alanine:glyoxylate aminotransferase (EC 2.6.1.44)
1	849	420	fig|573.1888.peg.849	N-carbamoyl-L-amino acid hydrolase (EC 3.5.1.87)	bi	1	776	fig|573.2207.peg.776	100	N-carbamoyl-L-amino acid hydrolase (EC 3.5.1.87)	bi	1	847	fig|573.2212.peg.847	100	N-carbamoyl-L-amino acid hydrolase (EC 3.5.1.87)	bi	1	4125	fig|573.2215.peg.4125	100	N-carbamoyl-L-amino acid hydrolase (EC 3.5.1.87)	bi	1	2648	fig|573.2241.peg.2648	99.05	N-carbamoyl-L-amino acid hydrolase (EC 3.5.1.87)
1	850	326	fig|573.1888.peg.850	putative dehydrogenase	bi	1	775	fig|573.2207.peg.775	100	putative dehydrogenase	bi	1	848	fig|573.2212.peg.848	100	putative dehydrogenase	bi	1	4124	fig|573.2215.peg.4124	100	putative dehydrogenase	bi	1	2647	fig|573.2241.peg.2647	99.38	putative dehydrogenase
1	851	299	fig|573.1888.peg.851	Chromosome initiation inhibitor	bi	1	774	fig|573.2207.peg.774	100	Chromosome initiation inhibitor	bi	1	849	fig|573.2212.peg.849	100	Chromosome initiation inhibitor	bi	1	4123	fig|573.2215.peg.4123	100	Chromosome initiation inhibitor	bi	1	2646	fig|573.2241.peg.2646	100	Chromosome initiation inhibitor
1	852	178	fig|573.1888.peg.852	FIG00732920: hypothetical protein	bi	1	773	fig|573.2207.peg.773	100	FIG00732920: hypothetical protein	bi	1	850	fig|573.2212.peg.850	100	FIG00732920: hypothetical protein	bi	1	4122	fig|573.2215.peg.4122	100	FIG00732920: hypothetical protein	bi	1	2645	fig|573.2241.peg.2645	100	FIG00732920: hypothetical protein
1	853	367	fig|573.1888.peg.853	FMN oxidoreductase	bi	1	772	fig|573.2207.peg.772	100	FMN oxidoreductase	bi	1	851	fig|573.2212.peg.851	100	FMN oxidoreductase	bi	1	4121	fig|573.2215.peg.4121	99.73	FMN oxidoreductase	bi	1	2644	fig|573.2241.peg.2644	99.18	FMN oxidoreductase
1	854	536	fig|573.1888.peg.854	Acyl-CoA dehydrogenase; probable dibenzothiophene desulfurization enzyme	bi	1	771	fig|573.2207.peg.771	100	Acyl-CoA dehydrogenase; probable dibenzothiophene desulfurization enzyme	bi	1	852	fig|573.2212.peg.852	100	Acyl-CoA dehydrogenase; probable dibenzothiophene desulfurization enzyme	bi	1	4120	fig|573.2215.peg.4120	99.81	Acyl-CoA dehydrogenase; probable dibenzothiophene desulfurization enzyme	bi	1	2643	fig|573.2241.peg.2643	99.44	Acyl-CoA dehydrogenase; probable dibenzothiophene desulfurization enzyme
1	855	411	fig|573.1888.peg.855	Putative metabolite transport protein	bi	1	770	fig|573.2207.peg.770	100	Putative metabolite transport protein	bi	1	853	fig|573.2212.peg.853	100	Putative metabolite transport protein	bi	1	4119	fig|573.2215.peg.4119	100	Putative metabolite transport protein	bi	1	2642	fig|573.2241.peg.2642	99.51	Putative metabolite transport protein
1	856	305	fig|573.1888.peg.856	Permease of the drug/metabolite transporter (DMT) superfamily	bi	1	769	fig|573.2207.peg.769	100	Permease of the drug/metabolite transporter (DMT) superfamily	bi	1	854	fig|573.2212.peg.854	100	Permease of the drug/metabolite transporter (DMT) superfamily	bi	1	4118	fig|573.2215.peg.4118	100	Permease of the drug/metabolite transporter (DMT) superfamily	bi	1	2641	fig|573.2241.peg.2641	98.32	Permease of the drug/metabolite transporter (DMT) superfamily
1	857	367	fig|573.1888.peg.857	FIG00732415: hypothetical protein	bi	1	768	fig|573.2207.peg.768	100	FIG00732415: hypothetical protein	bi	1	855	fig|573.2212.peg.855	100	FIG00732415: hypothetical protein	bi	1	4117	fig|573.2215.peg.4117	100	FIG00732415: hypothetical protein	bi	1	2640	fig|573.2241.peg.2640	99.73	FIG00732415: hypothetical protein
1	858	193	fig|573.1888.peg.858	Transcriptional regulator, TetR family	bi	1	767	fig|573.2207.peg.767	100	Transcriptional regulator, TetR family	bi	1	856	fig|573.2212.peg.856	100	Transcriptional regulator, TetR family	bi	1	4116	fig|573.2215.peg.4116	100	Transcriptional regulator, TetR family	bi	1	2639	fig|573.2241.peg.2639	99.48	Transcriptional regulator, TetR family
1	859	193	fig|573.1888.peg.859	Ribosomal-protein-serine acetyltransferase (EC 2.3.1.-)	bi	1	766	fig|573.2207.peg.766	100	Ribosomal-protein-serine acetyltransferase (EC 2.3.1.-)	bi	1	857	fig|573.2212.peg.857	100	Ribosomal-protein-serine acetyltransferase (EC 2.3.1.-)	bi	1	4115	fig|573.2215.peg.4115	100	Ribosomal-protein-serine acetyltransferase (EC 2.3.1.-)	bi	1	2638	fig|573.2241.peg.2638	98.86	Ribosomal-protein-serine acetyltransferase (EC 2.3.1.-)
1	860	433	fig|573.1888.peg.860	FIG00732331: hypothetical protein	bi	1	765	fig|573.2207.peg.765	100	FIG00732331: hypothetical protein	bi	1	858	fig|573.2212.peg.858	100	FIG00732331: hypothetical protein	bi	1	4114	fig|573.2215.peg.4114	100	FIG00732331: hypothetical protein	bi	1	2637	fig|573.2241.peg.2637	98.61	FIG00732331: hypothetical protein
1	861	351	fig|573.1888.peg.861	Transcriptional regulator, LacI family	bi	1	764	fig|573.2207.peg.764	99.71	Transcriptional regulator, LacI family	bi	1	859	fig|573.2212.peg.859	100	Transcriptional regulator, LacI family	bi	1	4113	fig|573.2215.peg.4113	99.71	Transcriptional regulator, LacI family	bi	1	2636	fig|573.2241.peg.2636	99.71	Transcriptional regulator, LacI family
1	862	146	fig|573.1888.peg.862	PTS system, IIA component	bi	1	763	fig|573.2207.peg.763	100	PTS system, IIA component	bi	1	860	fig|573.2212.peg.860	100	PTS system, IIA component	bi	1	4112	fig|573.2215.peg.4112	100	PTS system, IIA component	bi	1	2635	fig|573.2241.peg.2635	97.24	PTS system, IIA component
1	863	89	fig|573.1888.peg.863	FIG01225319: hypothetical protein	bi	1	762	fig|573.2207.peg.762	100	FIG01225319: hypothetical protein	bi	1	861	fig|573.2212.peg.861	100	FIG01225319: hypothetical protein	bi	1	4111	fig|573.2215.peg.4111	100	FIG01225319: hypothetical protein	bi	1	2634	fig|573.2241.peg.2634	100	FIG01225319: hypothetical protein
1	864	421	fig|573.1888.peg.864	FIG00732228: membrane protein	bi	1	761	fig|573.2207.peg.761	100	FIG00732228: membrane protein	bi	1	862	fig|573.2212.peg.862	100	FIG00732228: membrane protein	bi	1	4110	fig|573.2215.peg.4110	100	FIG00732228: membrane protein	bi	1	2633	fig|573.2241.peg.2633	100	FIG00732228: membrane protein
1	865	227	fig|573.1888.peg.865	Ribulose-phosphate 3-epimerase (EC 5.1.3.1)	bi	1	760	fig|573.2207.peg.760	100	Ribulose-phosphate 3-epimerase (EC 5.1.3.1)	bi	1	863	fig|573.2212.peg.863	100	Ribulose-phosphate 3-epimerase (EC 5.1.3.1)	bi	1	4109	fig|573.2215.peg.4109	100	Ribulose-phosphate 3-epimerase (EC 5.1.3.1)	bi	1	2632	fig|573.2241.peg.2632	99.56	Ribulose-phosphate 3-epimerase (EC 5.1.3.1)
1	866	157	fig|573.1888.peg.866	PTS system, fructose-specific IIA component (EC 2.7.1.69)	bi	1	759	fig|573.2207.peg.759	100	PTS system, fructose-specific IIA component (EC 2.7.1.69)	bi	1	864	fig|573.2212.peg.864	100	PTS system, fructose-specific IIA component (EC 2.7.1.69)	bi	1	4108	fig|573.2215.peg.4108	100	PTS system, fructose-specific IIA component (EC 2.7.1.69)	bi	1	2631	fig|573.2241.peg.2631	100	PTS system, fructose-specific IIA component (EC 2.7.1.69)
1	867	104	fig|573.1888.peg.867	PTS system, fructose-specific IIA component / PTS system, fructose-specific IIB component (EC 2.7.1.69) / PTS system, fructose-specific IIC component	bi	1	758	fig|573.2207.peg.758	100	PTS system, fructose-specific IIA component / PTS system, fructose-specific IIB component (EC 2.7.1.69) / PTS system, fructose-specific IIC component	bi	1	865	fig|573.2212.peg.865	100	PTS system, fructose-specific IIA component / PTS system, fructose-specific IIB component (EC 2.7.1.69) / PTS system, fructose-specific IIC component	bi	1	4107	fig|573.2215.peg.4107	100	PTS system, fructose-specific IIA component / PTS system, fructose-specific IIB component (EC 2.7.1.69) / PTS system, fructose-specific IIC component	bi	1	2630	fig|573.2241.peg.2630	97.09	PTS system, fructose-specific IIA component (EC 2.7.1.69) / PTS system, fructose-specific IIB component (EC 2.7.1.69) / PTS system, fructose-specific IIC component (EC 2.7.1.69)
1	868	369	fig|573.1888.peg.868	PTS system, fructose-specific IIBC component (EC 2.7.1.69)	bi	1	757	fig|573.2207.peg.757	100	PTS system, fructose-specific IIBC component (EC 2.7.1.69)	bi	1	866	fig|573.2212.peg.866	100	PTS system, fructose-specific IIBC component (EC 2.7.1.69)	bi	1	4106	fig|573.2215.peg.4106	100	PTS system, fructose-specific IIBC component (EC 2.7.1.69)	bi	1	2629	fig|573.2241.peg.2629	99.73	PTS system, fructose-specific IIBC component (EC 2.7.1.69)
1	869	207	fig|573.1888.peg.869	Putative threonine efflux protein	bi	1	756	fig|573.2207.peg.756	100	Putative threonine efflux protein	bi	1	867	fig|573.2212.peg.867	100	Putative threonine efflux protein	bi	1	4105	fig|573.2215.peg.4105	100	Putative threonine efflux protein	bi	1	2628	fig|573.2241.peg.2628	97.57	Putative threonine efflux protein
1	870	403	fig|573.1888.peg.870	MxcK	bi	1	755	fig|573.2207.peg.755	100	MxcK	bi	1	868	fig|573.2212.peg.868	99.5	MxcK	bi	1	4104	fig|573.2215.peg.4104	99.5	MxcK	bi	1	2627	fig|573.2241.peg.2627	99.25	MxcK
1	871	301	fig|573.1888.peg.871	putative transcriptional regulator, LysR family	bi	1	754	fig|573.2207.peg.754	100	putative transcriptional regulator, LysR family	bi	1	869	fig|573.2212.peg.869	100	putative transcriptional regulator, LysR family	bi	1	4103	fig|573.2215.peg.4103	100	putative transcriptional regulator, LysR family	bi	1	2626	fig|573.2241.peg.2626	98.67	putative transcriptional regulator, LysR family
1	872	296	fig|573.1888.peg.872	FIG00731420: hypothetical protein	bi	1	753	fig|573.2207.peg.753	100	FIG00731420: hypothetical protein	bi	1	870	fig|573.2212.peg.870	100	FIG00731420: hypothetical protein	bi	1	4102	fig|573.2215.peg.4102	100	FIG00731420: hypothetical protein	bi	1	2625	fig|573.2241.peg.2625	99.32	FIG00731420: hypothetical protein
1	873	265	fig|573.1888.peg.873	N-acyl homoserine lactone hydrolase	bi	1	752	fig|573.2207.peg.752	100	N-acyl homoserine lactone hydrolase	bi	1	871	fig|573.2212.peg.871	100	N-acyl homoserine lactone hydrolase	bi	1	4101	fig|573.2215.peg.4101	99.22	N-acyl homoserine lactone hydrolase	bi	1	2624	fig|573.2241.peg.2624	99.59	N-acyl homoserine lactone hydrolase
1	874	39	fig|573.1888.peg.874	hypothetical protein	-				0		-				0		uni	1	4101	fig|573.2215.peg.4101	97.3	N-acyl homoserine lactone hydrolase	-				0
1	875	143	fig|573.1888.peg.875	TolA protein	bi	1	751	fig|573.2207.peg.751	100	TolA protein	bi	1	872	fig|573.2212.peg.872	100	TolA protein	bi	1	4100	fig|573.2215.peg.4100	100	TolA protein	bi	1	2623	fig|573.2241.peg.2623	100	TolA protein
1	876	381	fig|573.1888.peg.876	Acetylornithine deacetylase (EC 3.5.1.16)	bi	1	750	fig|573.2207.peg.750	100	Acetylornithine deacetylase (EC 3.5.1.16)	bi	1	873	fig|573.2212.peg.873	100	Acetylornithine deacetylase (EC 3.5.1.16)	bi	1	4099	fig|573.2215.peg.4099	100	Acetylornithine deacetylase (EC 3.5.1.16)	bi	1	2622	fig|573.2241.peg.2622	99.74	Acetylornithine deacetylase (EC 3.5.1.16)
1	877	252	fig|573.1888.peg.877	FIG074102: hypothetical protein	bi	1	749	fig|573.2207.peg.749	100	FIG074102: hypothetical protein	bi	1	874	fig|573.2212.peg.874	100	FIG074102: hypothetical protein	bi	1	4098	fig|573.2215.peg.4098	100	FIG074102: hypothetical protein	bi	1	2621	fig|573.2241.peg.2621	98.8	FIG074102: hypothetical protein
1	878	360	fig|573.1888.peg.878	resiniferatoxin-binding, phosphotriesterase-related protein	bi	1	748	fig|573.2207.peg.748	100	resiniferatoxin-binding, phosphotriesterase-related protein	bi	1	875	fig|573.2212.peg.875	100	resiniferatoxin-binding, phosphotriesterase-related protein	bi	1	4097	fig|573.2215.peg.4097	100	resiniferatoxin-binding, phosphotriesterase-related protein	bi	1	2620	fig|573.2241.peg.2620	100	resiniferatoxin-binding, phosphotriesterase-related protein
1	879	334	fig|573.1888.peg.879	Ribose ABC transport system, permease protein RbsC (TC 3.A.1.2.1)	bi	1	747	fig|573.2207.peg.747	100	Ribose ABC transport system, permease protein RbsC (TC 3.A.1.2.1)	bi	1	876	fig|573.2212.peg.876	100	Ribose ABC transport system, permease protein RbsC (TC 3.A.1.2.1)	bi	1	4096	fig|573.2215.peg.4096	100	Ribose ABC transport system, permease protein RbsC (TC 3.A.1.2.1)	bi	1	2619	fig|573.2241.peg.2619	100	Ribose ABC transport system, permease protein RbsC (TC 3.A.1.2.1)
1	880	249	fig|573.1888.peg.880	ABC transporter, ATP-binding protein	bi	1	746	fig|573.2207.peg.746	100	ABC transporter, ATP-binding protein	bi	1	877	fig|573.2212.peg.877	100	ABC transporter, ATP-binding protein	bi	1	4095	fig|573.2215.peg.4095	100	ABC transporter, ATP-binding protein	bi	1	2618	fig|573.2241.peg.2618	100	ABC transporter, ATP-binding protein
1	881	341	fig|573.1888.peg.881	regulatory protein, LacI:Periplasmic binding protein/LacI transcriptional regulator	bi	1	745	fig|573.2207.peg.745	100	regulatory protein, LacI:Periplasmic binding protein/LacI transcriptional regulator	bi	1	878	fig|573.2212.peg.878	100	regulatory protein, LacI:Periplasmic binding protein/LacI transcriptional regulator	bi	1	4094	fig|573.2215.peg.4094	100	regulatory protein, LacI:Periplasmic binding protein/LacI transcriptional regulator	bi	1	2617	fig|573.2241.peg.2617	100	regulatory protein, LacI:Periplasmic binding protein/LacI transcriptional regulator
1	882	45	fig|573.1888.peg.882	hypothetical protein	bi	1	744	fig|573.2207.peg.744	100	hypothetical protein	-				0		-				0		bi	1	2616	fig|573.2241.peg.2616	100	hypothetical protein
1	883	318	fig|573.1888.peg.883	Ribose ABC transporter, periplasmic ribose-binding protein RbsB (TC 3.A.1.2.1)	bi	1	743	fig|573.2207.peg.743	100	Ribose ABC transporter, periplasmic ribose-binding protein RbsB (TC 3.A.1.2.1)	bi	1	879	fig|573.2212.peg.879	99.68	Ribose ABC transporter, periplasmic ribose-binding protein RbsB (TC 3.A.1.2.1)	bi	1	4093	fig|573.2215.peg.4093	100	Ribose ABC transporter, periplasmic ribose-binding protein RbsB (TC 3.A.1.2.1)	bi	1	2615	fig|573.2241.peg.2615	100	Ribose ABC transporter, periplasmic ribose-binding protein RbsB (TC 3.A.1.2.1)
1	884	291	fig|573.1888.peg.884	Ribokinase (EC 2.7.1.15)	bi	1	742	fig|573.2207.peg.742	100	Ribokinase (EC 2.7.1.15)	bi	1	880	fig|573.2212.peg.880	99.66	Ribokinase (EC 2.7.1.15)	bi	1	4092	fig|573.2215.peg.4092	100	Ribokinase (EC 2.7.1.15)	bi	1	2614	fig|573.2241.peg.2614	100	Ribokinase (EC 2.7.1.15)
1	885	282	fig|573.1888.peg.885	FIG00984300: hypothetical protein	bi	1	741	fig|573.2207.peg.741	100	FIG00984300: hypothetical protein	bi	1	881	fig|573.2212.peg.881	99.64	FIG00984300: hypothetical protein	bi	1	4091	fig|573.2215.peg.4091	100	FIG00984300: hypothetical protein	bi	1	2613	fig|573.2241.peg.2613	99.29	FIG00984300: hypothetical protein
1	886	215	fig|573.1888.peg.886	Thiaminase II (EC 3.5.99.2)	bi	1	740	fig|573.2207.peg.740	100	Thiaminase II (EC 3.5.99.2)	bi	1	882	fig|573.2212.peg.882	100	Thiaminase II (EC 3.5.99.2)	bi	1	4090	fig|573.2215.peg.4090	100	Thiaminase II (EC 3.5.99.2)	bi	1	2612	fig|573.2241.peg.2612	99.53	Thiaminase II (EC 3.5.99.2)
1	887	126	fig|573.1888.peg.887	Hydrolases of the alpha/beta superfamily	bi	1	739	fig|573.2207.peg.739	100	Hydrolases of the alpha/beta superfamily	bi	1	883	fig|573.2212.peg.883	100	Hydrolases of the alpha/beta superfamily	bi	1	4089	fig|573.2215.peg.4089	100	Hydrolases of the alpha/beta superfamily	bi	1	2611	fig|573.2241.peg.2611	100	Hydrolases of the alpha/beta superfamily
1	888	150	fig|573.1888.peg.888	FIG00731387: hypothetical protein	bi	1	738	fig|573.2207.peg.738	100	FIG00731387: hypothetical protein	bi	1	884	fig|573.2212.peg.884	100	FIG00731387: hypothetical protein	bi	1	4088	fig|573.2215.peg.4088	100	FIG00731387: hypothetical protein	bi	1	2610	fig|573.2241.peg.2610	98.66	FIG00731387: hypothetical protein
1	889	464	fig|573.1888.peg.889	Phosphoglycerate transporter protein PgtP	bi	1	737	fig|573.2207.peg.737	100	Phosphoglycerate transporter protein PgtP	bi	1	885	fig|573.2212.peg.885	100	Phosphoglycerate transporter protein PgtP	bi	1	4087	fig|573.2215.peg.4087	100	Phosphoglycerate transporter protein PgtP	bi	1	2606	fig|573.2241.peg.2606	100	Phosphoglycerate transporter protein PgtP
1	890	407	fig|573.1888.peg.890	Phosphoglycerate transport regulatory protein PgtC	bi	1	736	fig|573.2207.peg.736	100	Phosphoglycerate transport regulatory protein PgtC	bi	1	886	fig|573.2212.peg.886	100	Phosphoglycerate transport regulatory protein PgtC	bi	1	4086	fig|573.2215.peg.4086	100	Phosphoglycerate transport regulatory protein PgtC	bi	1	2605	fig|573.2241.peg.2605	97.78	Phosphoglycerate transport regulatory protein PgtC
1	891	665	fig|573.1888.peg.891	Phosphoglycerate transport system sensor protein PgtB (EC 2.7.3.-)	bi	1	735	fig|573.2207.peg.735	100	Phosphoglycerate transport system sensor protein PgtB (EC 2.7.3.-)	bi	1	887	fig|573.2212.peg.887	100	Phosphoglycerate transport system sensor protein PgtB (EC 2.7.3.-)	bi	1	4084	fig|573.2215.peg.4084	100	Phosphoglycerate transport system sensor protein PgtB (EC 2.7.3.-)	bi	1	2604	fig|573.2241.peg.2604	100	Phosphoglycerate transport system sensor protein PgtB (EC 2.7.3.-)
1	892	417	fig|573.1888.peg.892	Phosphoglycerate transport system transcriptional regulatory protein PgtA	bi	1	734	fig|573.2207.peg.734	100	Phosphoglycerate transport system transcriptional regulatory protein PgtA	bi	1	888	fig|573.2212.peg.888	100	Phosphoglycerate transport system transcriptional regulatory protein PgtA	bi	1	4083	fig|573.2215.peg.4083	100	Phosphoglycerate transport system transcriptional regulatory protein PgtA	bi	1	2603	fig|573.2241.peg.2603	99.52	Phosphoglycerate transport system transcriptional regulatory protein PgtA
1	893	40	fig|573.1888.peg.893	hypothetical protein	bi	1	733	fig|573.2207.peg.733	100	hypothetical protein	bi	1	889	fig|573.2212.peg.889	100	hypothetical protein	bi	1	4082	fig|573.2215.peg.4082	100	hypothetical protein	bi	1	2602	fig|573.2241.peg.2602	97.44	Uncharacterised protein family UPF0157 (COG2320)
1	894	303	fig|573.1888.peg.894	Transcriptional regulator	bi	1	732	fig|573.2207.peg.732	100	Transcriptional regulator	bi	1	890	fig|573.2212.peg.890	100	Transcriptional regulator	bi	1	4081	fig|573.2215.peg.4081	100	Transcriptional regulator	bi	1	2601	fig|573.2241.peg.2601	99.67	Transcriptional regulator
1	895	329	fig|573.1888.peg.895	sugar-phosphate dehydrogenase	bi	1	731	fig|573.2207.peg.731	100	sugar-phosphate dehydrogenase	bi	1	891	fig|573.2212.peg.891	100	sugar-phosphate dehydrogenase	bi	1	4080	fig|573.2215.peg.4080	100	sugar-phosphate dehydrogenase	bi	1	2600	fig|573.2241.peg.2600	99.39	sugar-phosphate dehydrogenase
1	896	394	fig|573.1888.peg.896	Aldo-keto reductase	bi	1	730	fig|573.2207.peg.730	100	Aldo-keto reductase	bi	1	892	fig|573.2212.peg.892	100	Aldo-keto reductase	bi	1	4079	fig|573.2215.peg.4079	98.13	Aldo-keto reductase	bi	1	2599	fig|573.2241.peg.2599	98.47	Aldo-keto reductase
1	897	328	fig|573.1888.peg.897	hypothetical protein	bi	1	729	fig|573.2207.peg.729	100	hypothetical protein	bi	1	893	fig|573.2212.peg.893	100	hypothetical protein	bi	1	4078	fig|573.2215.peg.4078	100	hypothetical protein	bi	1	2597	fig|573.2241.peg.2597	98.72	Lactonase Drp35 (EC 3.1.1.-)
1	898	346	fig|573.1888.peg.898	L-fuco-beta-pyranose dehydrogenase (EC 1.1.1.122)	bi	1	728	fig|573.2207.peg.728	100	L-fuco-beta-pyranose dehydrogenase (EC 1.1.1.122)	bi	1	894	fig|573.2212.peg.894	100	L-fuco-beta-pyranose dehydrogenase (EC 1.1.1.122)	bi	1	4077	fig|573.2215.peg.4077	100	L-fuco-beta-pyranose dehydrogenase (EC 1.1.1.122)	bi	1	2596	fig|573.2241.peg.2596	100	L-fuco-beta-pyranose dehydrogenase (EC 1.1.1.122)
1	899	38	fig|573.1888.peg.899	hypothetical protein	bi	1	726	fig|573.2207.peg.726	100	hypothetical protein	bi	1	920	fig|573.2212.peg.920	100	hypothetical protein	-				0		-				0
1	900	304	fig|573.1888.peg.900	Transcriptional activator MetR	bi	1	725	fig|573.2207.peg.725	100	Transcriptional activator MetR	bi	1	921	fig|573.2212.peg.921	100	Transcriptional activator MetR	bi	1	4073	fig|573.2215.peg.4073	100	Transcriptional activator MetR	uni	1	118	fig|573.2241.peg.118	31.33	HTH-type transcriptional regulator IlvY
1	901	402	fig|573.1888.peg.901	Cystathionine beta-lyase (EC 4.4.1.8)	bi	1	724	fig|573.2207.peg.724	100	Cystathionine beta-lyase (EC 4.4.1.8)	bi	1	922	fig|573.2212.peg.922	100	Cystathionine beta-lyase (EC 4.4.1.8)	bi	1	4072	fig|573.2215.peg.4072	100	Cystathionine beta-lyase (EC 4.4.1.8)	uni	1	4491	fig|573.2241.peg.4491	41.04	Cystathionine beta-lyase (EC 4.4.1.8)
1	902	395	fig|573.1888.peg.902	Transcriptional regulator, GntR family domain	bi	1	723	fig|573.2207.peg.723	100	Transcriptional regulator, GntR family domain	bi	1	923	fig|573.2212.peg.923	100	Transcriptional regulator, GntR family domain	bi	1	4071	fig|573.2215.peg.4071	100	Transcriptional regulator, GntR family domain	uni	1	4478	fig|573.2241.peg.4478	58.52	Transcriptional regulator, GntR family domain
1	903	427	fig|573.1888.peg.903	Serine transporter	bi	1	722	fig|573.2207.peg.722	100	Serine transporter	bi	1	924	fig|573.2212.peg.924	100	Serine transporter	bi	1	4070	fig|573.2215.peg.4070	100	Serine transporter	uni	1	1787	fig|573.2241.peg.1787	26.53	Serine transporter
1	904	313	fig|573.1888.peg.904	Transcriptional regulator, LysR family	bi	1	721	fig|573.2207.peg.721	100	Transcriptional regulator, LysR family	bi	1	925	fig|573.2212.peg.925	100	Transcriptional regulator, LysR family	bi	1	4069	fig|573.2215.peg.4069	100	Transcriptional regulator, LysR family	uni	1	928	fig|573.2241.peg.928	31.06	LysR family transcriptional regulator YafC
1	905	335	fig|573.1888.peg.905	putative Cytochrome bd2, subunit II	bi	1	720	fig|573.2207.peg.720	100	putative Cytochrome bd2, subunit II	bi	1	926	fig|573.2212.peg.926	100	putative Cytochrome bd2, subunit II	bi	1	4068	fig|573.2215.peg.4068	100	putative Cytochrome bd2, subunit II	uni	1	2828	fig|573.2241.peg.2828	68.86	putative Cytochrome bd2, subunit II
1	906	473	fig|573.1888.peg.906	putative Cytochrome bd2, subunit I	bi	1	719	fig|573.2207.peg.719	100	putative Cytochrome bd2, subunit I	bi	1	927	fig|573.2212.peg.927	100	putative Cytochrome bd2, subunit I	bi	1	4067	fig|573.2215.peg.4067	99.72	putative Cytochrome bd2, subunit I	uni	1	2827	fig|573.2241.peg.2827	76.08	putative Cytochrome bd2, subunit I
1	907	152	fig|573.1888.peg.907	Uncharacterized conserved protein	bi	1	718	fig|573.2207.peg.718	100	Uncharacterized conserved protein	bi	1	928	fig|573.2212.peg.928	100	Uncharacterized conserved protein	bi	1	4066	fig|573.2215.peg.4066	100	Uncharacterized conserved protein	-				0
1	908	50	fig|573.1888.peg.908	hypothetical protein	bi	1	717	fig|573.2207.peg.717	100	hypothetical protein	bi	1	929	fig|573.2212.peg.929	97.96	Thioredoxin	bi	1	4065	fig|573.2215.peg.4065	100	hypothetical protein	-				0
1	909	342	fig|573.1888.peg.909	Alcohol dehydrogenase (EC 1.1.1.1)	bi	1	716	fig|573.2207.peg.716	100	Alcohol dehydrogenase (EC 1.1.1.1)	bi	1	930	fig|573.2212.peg.930	100	Alcohol dehydrogenase (EC 1.1.1.1)	bi	1	4064	fig|573.2215.peg.4064	100	Alcohol dehydrogenase (EC 1.1.1.1)	uni	1	2750	fig|573.2241.peg.2750	31.94	Alcohol dehydrogenase (EC 1.1.1.1)
1	910	358	fig|573.1888.peg.910	Possible monoamine oxidase	bi	1	715	fig|573.2207.peg.715	100	Possible monoamine oxidase	bi	1	931	fig|573.2212.peg.931	100	Possible monoamine oxidase	bi	1	4063	fig|573.2215.peg.4063	100	Possible monoamine oxidase	-				0
1	911	194	fig|573.1888.peg.911	hypothetical protein	bi	1	714	fig|573.2207.peg.714	100	hypothetical protein	bi	1	932	fig|573.2212.peg.932	100	hypothetical protein	bi	1	4062	fig|573.2215.peg.4062	100	hypothetical protein	-				0
1	912	94	fig|573.1888.peg.912	FIG00454495: hypothetical protein	bi	1	713	fig|573.2207.peg.713	100	FIG00454495: hypothetical protein	bi	1	933	fig|573.2212.peg.933	100	FIG00454495: hypothetical protein	bi	1	4061	fig|573.2215.peg.4061	100	FIG00454495: hypothetical protein	-				0
1	913	41	fig|573.1888.peg.913	hypothetical protein	-				0		-				0		-				0		-				0
1	914	321	fig|573.1888.peg.914	Glycine cleavage system transcriptional activator GcvA	bi	1	712	fig|573.2207.peg.712	100	Glycine cleavage system transcriptional activator GcvA	bi	1	934	fig|573.2212.peg.934	100	Glycine cleavage system transcriptional activator GcvA	bi	1	4060	fig|573.2215.peg.4060	100	Glycine cleavage system transcriptional activator GcvA	uni	1	4181	fig|573.2241.peg.4181	37	Glycine cleavage system transcriptional activator GcvA
1	915	519	fig|573.1888.peg.915	Long-chain-fatty-acid--CoA ligase (EC 6.2.1.3)	bi	1	711	fig|573.2207.peg.711	100	Long-chain-fatty-acid--CoA ligase (EC 6.2.1.3)	bi	1	935	fig|573.2212.peg.935	100	Long-chain-fatty-acid--CoA ligase (EC 6.2.1.3)	bi	1	4059	fig|573.2215.peg.4059	100	Long-chain-fatty-acid--CoA ligase (EC 6.2.1.3)	bi	1	2580	fig|573.2241.peg.2580	99.61	Long-chain-fatty-acid--CoA ligase (EC 6.2.1.3)
1	916	531	fig|573.1888.peg.916	Acetyl-CoA:acetoacetyl-CoA transferase, alpha subunit (EC 2.8.3.8)	bi	1	710	fig|573.2207.peg.710	100	Acetyl-CoA:acetoacetyl-CoA transferase, alpha subunit (EC 2.8.3.8)	bi	1	936	fig|573.2212.peg.936	99.81	Acetyl-CoA:acetoacetyl-CoA transferase, alpha subunit (EC 2.8.3.8)	bi	1	4058	fig|573.2215.peg.4058	99.81	Acetyl-CoA:acetoacetyl-CoA transferase, alpha subunit (EC 2.8.3.8)	bi	1	2579	fig|573.2241.peg.2579	99.62	Acetyl-CoA:acetoacetyl-CoA transferase, alpha subunit (EC 2.8.3.8)
1	917	245	fig|573.1888.peg.917	3-oxoacyl-[acyl-carrier protein] reductase (EC 1.1.1.100)	bi	1	709	fig|573.2207.peg.709	100	3-oxoacyl-[acyl-carrier protein] reductase (EC 1.1.1.100)	bi	1	937	fig|573.2212.peg.937	100	3-oxoacyl-[acyl-carrier protein] reductase (EC 1.1.1.100)	bi	1	4057	fig|573.2215.peg.4057	100	3-oxoacyl-[acyl-carrier protein] reductase (EC 1.1.1.100)	bi	1	2578	fig|573.2241.peg.2578	99.18	3-oxoacyl-[acyl-carrier protein] reductase (EC 1.1.1.100)
1	918	397	fig|573.1888.peg.918	3-ketoacyl-CoA thiolase (EC 2.3.1.16); Acetyl-CoA acetyltransferase (EC 2.3.1.9)	bi	1	708	fig|573.2207.peg.708	100	3-ketoacyl-CoA thiolase (EC 2.3.1.16); Acetyl-CoA acetyltransferase (EC 2.3.1.9)	bi	1	938	fig|573.2212.peg.938	100	3-ketoacyl-CoA thiolase (EC 2.3.1.16); Acetyl-CoA acetyltransferase (EC 2.3.1.9)	bi	1	4056	fig|573.2215.peg.4056	100	3-ketoacyl-CoA thiolase (EC 2.3.1.16); Acetyl-CoA acetyltransferase (EC 2.3.1.9)	bi	1	2577	fig|573.2241.peg.2577	100	3-ketoacyl-CoA thiolase (EC 2.3.1.16); Acetyl-CoA acetyltransferase (EC 2.3.1.9)
1	919	446	fig|573.1888.peg.919	Nitrate/nitrite transporter	bi	1	707	fig|573.2207.peg.707	100	Nitrate/nitrite transporter	bi	1	939	fig|573.2212.peg.939	100	Nitrate/nitrite transporter	bi	1	4055	fig|573.2215.peg.4055	100	Nitrate/nitrite transporter	bi	1	2576	fig|573.2241.peg.2576	99.33	Nitrate/nitrite transporter
1	920	293	fig|573.1888.peg.920	Senescence marker protein-30	bi	1	706	fig|573.2207.peg.706	100	Senescence marker protein-30	bi	1	940	fig|573.2212.peg.940	100	Senescence marker protein-30	bi	1	4054	fig|573.2215.peg.4054	100	Senescence marker protein-30	bi	1	2575	fig|573.2241.peg.2575	99.32	Senescence marker protein-30
1	921	446	fig|573.1888.peg.921	Permeases of the major facilitator superfamily	bi	1	705	fig|573.2207.peg.705	100	Permeases of the major facilitator superfamily	bi	1	941	fig|573.2212.peg.941	100	Permeases of the major facilitator superfamily	bi	1	4053	fig|573.2215.peg.4053	100	Permeases of the major facilitator superfamily	bi	1	2574	fig|573.2241.peg.2574	100	Permeases of the major facilitator superfamily
1	922	392	fig|573.1888.peg.922	Glycerate kinase (EC 2.7.1.31)	bi	1	704	fig|573.2207.peg.704	100	Glycerate kinase (EC 2.7.1.31)	bi	1	942	fig|573.2212.peg.942	100	Glycerate kinase (EC 2.7.1.31)	bi	1	4052	fig|573.2215.peg.4052	99.74	Glycerate kinase (EC 2.7.1.31)	bi	1	2573	fig|573.2241.peg.2573	99.23	Glycerate kinase (EC 2.7.1.31)
1	923	386	fig|573.1888.peg.923	Sugar diacid utilization regulator SdaR	bi	1	703	fig|573.2207.peg.703	100	Sugar diacid utilization regulator SdaR	bi	1	943	fig|573.2212.peg.943	100	Sugar diacid utilization regulator SdaR	bi	1	4051	fig|573.2215.peg.4051	100	Sugar diacid utilization regulator SdaR	bi	1	2572	fig|573.2241.peg.2572	100	Sugar diacid utilization regulator SdaR
1	924	292	fig|573.1888.peg.924	2-hydroxy-3-oxopropionate reductase (EC 1.1.1.60)	bi	1	702	fig|573.2207.peg.702	100	2-hydroxy-3-oxopropionate reductase (EC 1.1.1.60)	bi	1	944	fig|573.2212.peg.944	100	2-hydroxy-3-oxopropionate reductase (EC 1.1.1.60)	bi	1	4050	fig|573.2215.peg.4050	100	2-hydroxy-3-oxopropionate reductase (EC 1.1.1.60)	bi	1	2571	fig|573.2241.peg.2571	98.97	2-hydroxy-3-oxopropionate reductase (EC 1.1.1.60)
1	925	295	fig|573.1888.peg.925	putative bacterial regulatory protein, LysR	bi	1	701	fig|573.2207.peg.701	100	putative bacterial regulatory protein, LysR	bi	1	945	fig|573.2212.peg.945	100	putative bacterial regulatory protein, LysR	bi	1	4049	fig|573.2215.peg.4049	90.14	putative bacterial regulatory protein, LysR	bi	1	2570	fig|573.2241.peg.2570	99.66	putative bacterial regulatory protein, LysR
1	926	257	fig|573.1888.peg.926	HTH-type transcriptional regulator YidP	bi	1	699	fig|573.2207.peg.699	100	HTH-type transcriptional regulator YidP	bi	1	947	fig|573.2212.peg.947	100	HTH-type transcriptional regulator YidP	bi	1	4047	fig|573.2215.peg.4047	100	HTH-type transcriptional regulator YidP	bi	1	2569	fig|573.2241.peg.2569	100	HTH-type transcriptional regulator YidP
1	927	511	fig|573.1888.peg.927	PTS system, maltose and glucose-specific IIC component (EC 2.7.1.69) / PTS system, maltose and glucose-specific IIB component (EC 2.7.1.69)	bi	1	698	fig|573.2207.peg.698	100	PTS system, maltose and glucose-specific IIC component (EC 2.7.1.69) / PTS system, maltose and glucose-specific IIB component (EC 2.7.1.69)	bi	1	948	fig|573.2212.peg.948	99.8	PTS system, maltose and glucose-specific IIC component (EC 2.7.1.69) / PTS system, maltose and glucose-specific IIB component (EC 2.7.1.69)	bi	1	4046	fig|573.2215.peg.4046	100	PTS system, maltose and glucose-specific IIC component (EC 2.7.1.69) / PTS system, maltose and glucose-specific IIB component (EC 2.7.1.69)	bi	1	2568	fig|573.2241.peg.2568	99.41	PTS system, maltose and glucose-specific IIC component (EC 2.7.1.69) / PTS system, maltose and glucose-specific IIB component (EC 2.7.1.69)
1	928	443	fig|573.1888.peg.928	Maltose-6'-phosphate glucosidase (EC 3.2.1.122)	bi	1	697	fig|573.2207.peg.697	100	Maltose-6'-phosphate glucosidase (EC 3.2.1.122)	bi	1	949	fig|573.2212.peg.949	100	Maltose-6'-phosphate glucosidase (EC 3.2.1.122)	bi	1	4045	fig|573.2215.peg.4045	100	Maltose-6'-phosphate glucosidase (EC 3.2.1.122)	bi	1	2567	fig|573.2241.peg.2567	99.77	Maltose-6'-phosphate glucosidase (EC 3.2.1.122)
1	929	38	fig|573.1888.peg.929	hypothetical protein	bi	1	696	fig|573.2207.peg.696	100	hypothetical protein	bi	1	950	fig|573.2212.peg.950	100	hypothetical protein	bi	1	4044	fig|573.2215.peg.4044	100	hypothetical protein	bi	1	2566	fig|573.2241.peg.2566	100	hypothetical protein
1	930	482	fig|573.1888.peg.930	Arabinose-proton symporter	bi	1	695	fig|573.2207.peg.695	100	Arabinose-proton symporter	bi	1	951	fig|573.2212.peg.951	100	Arabinose-proton symporter	bi	1	4043	fig|573.2215.peg.4043	100	Arabinose-proton symporter	bi	1	2565	fig|573.2241.peg.2565	100	Arabinose-proton symporter
1	931	134	fig|573.1888.peg.931	Fructose-specific phosphocarrier protein HPr (EC 2.7.1.69) / PTS system, fructose-specific IIA component (EC 2.7.1.69)	bi	1	694	fig|573.2207.peg.694	100	Fructose-specific phosphocarrier protein HPr (EC 2.7.1.69) / PTS system, fructose-specific IIA component (EC 2.7.1.69)	bi	1	952	fig|573.2212.peg.952	100	Fructose-specific phosphocarrier protein HPr (EC 2.7.1.69) / PTS system, fructose-specific IIA component (EC 2.7.1.69)	bi	1	4042	fig|573.2215.peg.4042	100	Fructose-specific phosphocarrier protein HPr (EC 2.7.1.69) / PTS system, fructose-specific IIA component (EC 2.7.1.69)	bi	1	2564	fig|573.2241.peg.2564	100	Fructose-specific phosphocarrier protein HPr (EC 2.7.1.69) / PTS system, fructose-specific IIA component (EC 2.7.1.69)
1	932	201	fig|573.1888.peg.932	Mobile element protein	uni	1	1108	fig|573.2207.peg.1108	100	Mobile element protein	uni	1	1753	fig|573.2212.peg.1753	100	Mobile element protein	uni	1	763	fig|573.2215.peg.763	100	Mobile element protein	-				0
1	933	80	fig|573.1888.peg.933	FIG00732047: hypothetical protein	bi	1	692	fig|573.2207.peg.692	100	FIG00732047: hypothetical protein	bi	1	953	fig|573.2212.peg.953	100	FIG00732047: hypothetical protein	bi	1	4041	fig|573.2215.peg.4041	100	FIG00732047: hypothetical protein	bi	1	2562	fig|573.2241.peg.2562	98.73	FIG00732047: hypothetical protein
1	934	47	fig|573.1888.peg.934	hypothetical protein	bi	1	691	fig|573.2207.peg.691	100	hypothetical protein	bi	1	954	fig|573.2212.peg.954	100	hypothetical protein	bi	1	4040	fig|573.2215.peg.4040	100	hypothetical protein	bi	1	2561	fig|573.2241.peg.2561	100	hypothetical protein
1	935	310	fig|573.1888.peg.935	Periplasmic esterase IroE	bi	1	690	fig|573.2207.peg.690	100	Periplasmic esterase IroE	bi	1	955	fig|573.2212.peg.955	100	Periplasmic esterase IroE	bi	1	4039	fig|573.2215.peg.4039	100	Periplasmic esterase IroE	bi	1	2560	fig|573.2241.peg.2560	99.68	Periplasmic esterase IroE
1	936	552	fig|573.1888.peg.936	Sensory box/GGDEF family protein	bi	1	689	fig|573.2207.peg.689	100	Sensory box/GGDEF family protein	bi	1	956	fig|573.2212.peg.956	99.82	Sensory box/GGDEF family protein	bi	1	4038	fig|573.2215.peg.4038	100	Sensory box/GGDEF family protein	bi	1	2559	fig|573.2241.peg.2559	99.82	Sensory box/GGDEF family protein
1	937	83	fig|573.1888.peg.937	FIG00732736: hypothetical protein	bi	1	688	fig|573.2207.peg.688	100	FIG00732736: hypothetical protein	bi	1	957	fig|573.2212.peg.957	100	FIG00732736: hypothetical protein	bi	1	4037	fig|573.2215.peg.4037	100	FIG00732736: hypothetical protein	bi	1	2558	fig|573.2241.peg.2558	98.78	FIG00732736: hypothetical protein
1	938	73	fig|573.1888.peg.938	hypothetical protein	bi	1	687	fig|573.2207.peg.687	100	hypothetical protein	bi	1	958	fig|573.2212.peg.958	100	hypothetical protein	bi	1	4036	fig|573.2215.peg.4036	100	hypothetical protein	bi	1	2557	fig|573.2241.peg.2557	100	hypothetical protein
1	939	261	fig|573.1888.peg.939	Methionine aminopeptidase (EC 3.4.11.18)	bi	1	686	fig|573.2207.peg.686	100	Methionine aminopeptidase (EC 3.4.11.18)	bi	1	959	fig|573.2212.peg.959	100	Methionine aminopeptidase (EC 3.4.11.18)	bi	1	4035	fig|573.2215.peg.4035	100	Methionine aminopeptidase (EC 3.4.11.18)	bi	1	2556	fig|573.2241.peg.2556	99.62	Methionine aminopeptidase (EC 3.4.11.18)
1	940	96	fig|573.1888.peg.940	FIG00732192: hypothetical protein	bi	1	685	fig|573.2207.peg.685	100	FIG00732192: hypothetical protein	bi	1	960	fig|573.2212.peg.960	100	FIG00732192: hypothetical protein	bi	1	4034	fig|573.2215.peg.4034	100	FIG00732192: hypothetical protein	bi	1	2555	fig|573.2241.peg.2555	98.95	FIG00732192: hypothetical protein
1	941	188	fig|573.1888.peg.941	type 1 fimbriae protein FimI, unknown function	bi	1	684	fig|573.2207.peg.684	100	type 1 fimbriae protein FimI, unknown function	bi	1	961	fig|573.2212.peg.961	100	type 1 fimbriae protein FimI, unknown function	bi	1	4033	fig|573.2215.peg.4033	100	type 1 fimbriae protein FimI, unknown function	bi	1	2554	fig|573.2241.peg.2554	98.4	type 1 fimbriae protein FimI, unknown function
1	942	232	fig|573.1888.peg.942	putative fimbrial chaperone	bi	1	683	fig|573.2207.peg.683	100	putative fimbrial chaperone	bi	1	962	fig|573.2212.peg.962	100	putative fimbrial chaperone	bi	1	4032	fig|573.2215.peg.4032	100	putative fimbrial chaperone	bi	1	2553	fig|573.2241.peg.2553	98.27	putative fimbrial chaperone
1	943	834	fig|573.1888.peg.943	type 1 fimbriae anchoring protein FimD	bi	1	682	fig|573.2207.peg.682	100	type 1 fimbriae anchoring protein FimD	bi	1	963	fig|573.2212.peg.963	100	type 1 fimbriae anchoring protein FimD	bi	1	4031	fig|573.2215.peg.4031	99.64	type 1 fimbriae anchoring protein FimD	bi	1	2552	fig|573.2241.peg.2552	99.4	type 1 fimbriae anchoring protein FimD
1	944	335	fig|573.1888.peg.944	Fimbrial adhesin precursor	bi	1	681	fig|573.2207.peg.681	100	Fimbrial adhesin precursor	bi	1	964	fig|573.2212.peg.964	100	Fimbrial adhesin precursor	bi	1	4030	fig|573.2215.peg.4030	100	Fimbrial adhesin precursor	bi	1	2551	fig|573.2241.peg.2551	97.6	Fimbrial adhesin precursor
1	945	431	fig|573.1888.peg.945	COG1649 predicted glycoside hydrolase	bi	1	680	fig|573.2207.peg.680	100	COG1649 predicted glycoside hydrolase	bi	1	965	fig|573.2212.peg.965	100	COG1649 predicted glycoside hydrolase	bi	1	4029	fig|573.2215.peg.4029	100	COG1649 predicted glycoside hydrolase	bi	1	2550	fig|573.2241.peg.2550	100	COG1649 predicted glycoside hydrolase
1	946	441	fig|573.1888.peg.946	HipA protein	bi	1	679	fig|573.2207.peg.679	100	HipA protein	bi	1	966	fig|573.2212.peg.966	100	HipA protein	bi	1	4028	fig|573.2215.peg.4028	100	HipA protein	bi	1	2549	fig|573.2241.peg.2549	99.55	HipA protein
1	947	89	fig|573.1888.peg.947	HipB protein	bi	1	678	fig|573.2207.peg.678	100	HipB protein	bi	1	967	fig|573.2212.peg.967	100	HipB protein	bi	1	4027	fig|573.2215.peg.4027	100	HipB protein	bi	1	2548	fig|573.2241.peg.2548	98.86	HipB protein
1	948	109	fig|573.1888.peg.948	5-Hydroxyisourate Hydrolase (HIUase) (EC 3.5.2.17)	bi	1	677	fig|573.2207.peg.677	100	5-Hydroxyisourate Hydrolase (HIUase) (EC 3.5.2.17)	bi	1	968	fig|573.2212.peg.968	100	5-Hydroxyisourate Hydrolase (HIUase) (EC 3.5.2.17)	bi	1	4026	fig|573.2215.peg.4026	100	5-Hydroxyisourate Hydrolase (HIUase) (EC 3.5.2.17)	bi	1	2547	fig|573.2241.peg.2547	100	5-Hydroxyisourate Hydrolase (HIUase) (EC 3.5.2.17)
1	949	167	fig|573.1888.peg.949	Uricase (EC 1.7.3.3)	bi	1	676	fig|573.2207.peg.676	100	Uricase (EC 1.7.3.3)	bi	1	969	fig|573.2212.peg.969	100	Uricase (EC 1.7.3.3)	bi	1	4025	fig|573.2215.peg.4025	100	Uricase (EC 1.7.3.3)	bi	1	2546	fig|573.2241.peg.2546	96.99	Uricase (EC 1.7.3.3)
1	950	460	fig|573.1888.peg.950	Xanthine permease	bi	1	675	fig|573.2207.peg.675	100	Xanthine permease	bi	1	970	fig|573.2212.peg.970	100	Xanthine permease	bi	1	4024	fig|573.2215.peg.4024	100	Xanthine permease	bi	1	2545	fig|573.2241.peg.2545	99.56	Xanthine permease
1	951	385	fig|573.1888.peg.951	Salicylate hydroxylase (EC 1.14.13.1)	bi	1	674	fig|573.2207.peg.674	100	Salicylate hydroxylase (EC 1.14.13.1)	bi	1	971	fig|573.2212.peg.971	99.74	Salicylate hydroxylase (EC 1.14.13.1)	bi	1	4023	fig|573.2215.peg.4023	100	Salicylate hydroxylase (EC 1.14.13.1)	bi	1	2544	fig|573.2241.peg.2544	100	Salicylate hydroxylase (EC 1.14.13.1)
1	952	308	fig|573.1888.peg.952	LysR family regulatory protein CidR	bi	1	673	fig|573.2207.peg.673	100	LysR family regulatory protein CidR	bi	1	972	fig|573.2212.peg.972	100	LysR family regulatory protein CidR	bi	1	4022	fig|573.2215.peg.4022	100	LysR family regulatory protein CidR	bi	1	2543	fig|573.2241.peg.2543	99.02	LysR family regulatory protein CidR
1	953	346	fig|573.1888.peg.953	Vanillate O-demethylase oxygenase subunit (EC 1.14.13.82)	bi	1	672	fig|573.2207.peg.672	100	Vanillate O-demethylase oxygenase subunit (EC 1.14.13.82)	bi	1	973	fig|573.2212.peg.973	100	Vanillate O-demethylase oxygenase subunit (EC 1.14.13.82)	bi	1	4021	fig|573.2215.peg.4021	100	Vanillate O-demethylase oxygenase subunit (EC 1.14.13.82)	bi	1	2542	fig|573.2241.peg.2542	99.42	Vanillate O-demethylase oxygenase subunit (EC 1.14.13.82)
1	954	325	fig|573.1888.peg.954	Flavodoxin reductases (ferredoxin-NADPH reductases) family 1; Vanillate O-demethylase oxidoreductase (EC 1.14.13.-)	bi	1	671	fig|573.2207.peg.671	100	Flavodoxin reductases (ferredoxin-NADPH reductases) family 1; Vanillate O-demethylase oxidoreductase (EC 1.14.13.-)	bi	1	974	fig|573.2212.peg.974	100	Flavodoxin reductases (ferredoxin-NADPH reductases) family 1; Vanillate O-demethylase oxidoreductase (EC 1.14.13.-)	bi	1	4020	fig|573.2215.peg.4020	100	Flavodoxin reductases (ferredoxin-NADPH reductases) family 1; Vanillate O-demethylase oxidoreductase (EC 1.14.13.-)	bi	1	2541	fig|573.2241.peg.2541	98.15	Flavodoxin reductases (ferredoxin-NADPH reductases) family 1; Vanillate O-demethylase oxidoreductase (EC 1.14.13.-)
1	955	413	fig|573.1888.peg.955	Transcription regulatory protein opdE	bi	1	670	fig|573.2207.peg.670	100	Transcription regulatory protein opdE	bi	1	975	fig|573.2212.peg.975	100	Transcription regulatory protein opdE	bi	1	4019	fig|573.2215.peg.4019	100	Transcription regulatory protein opdE	bi	1	2540	fig|573.2241.peg.2540	99.27	Transcription regulatory protein opdE
1	956	315	fig|573.1888.peg.956	Transcriptional regulator, AraC family	bi	1	669	fig|573.2207.peg.669	100	Transcriptional regulator, AraC family	bi	1	976	fig|573.2212.peg.976	100	Transcriptional regulator, AraC family	bi	1	4018	fig|573.2215.peg.4018	100	Transcriptional regulator, AraC family	bi	1	2539	fig|573.2241.peg.2539	99.04	Transcriptional regulator, AraC family
1	957	252	fig|573.1888.peg.957	Glutamate synthase [NADPH] large chain (EC 1.4.1.13)	bi	1	668	fig|573.2207.peg.668	100	Glutamate synthase [NADPH] large chain (EC 1.4.1.13)	bi	1	977	fig|573.2212.peg.977	100	Glutamate synthase [NADPH] large chain (EC 1.4.1.13)	bi	1	4017	fig|573.2215.peg.4017	100	Glutamate synthase [NADPH] large chain (EC 1.4.1.13)	bi	1	2538	fig|573.2241.peg.2538	98.8	Glutamate synthase [NADPH] large chain (EC 1.4.1.13)
1	958	104	fig|573.1888.peg.958	Mannose-6-phosphate isomerase (EC 5.3.1.8)	bi	1	667	fig|573.2207.peg.667	100	Mannose-6-phosphate isomerase (EC 5.3.1.8)	bi	1	978	fig|573.2212.peg.978	100	Mannose-6-phosphate isomerase (EC 5.3.1.8)	bi	1	4016	fig|573.2215.peg.4016	99.03	Mannose-6-phosphate isomerase (EC 5.3.1.8)	bi	1	2537	fig|573.2241.peg.2537	100	Mannose-6-phosphate isomerase (EC 5.3.1.8)
1	959	88	fig|573.1888.peg.959	FIG00732260: hypothetical protein	bi	1	666	fig|573.2207.peg.666	100	FIG00732260: hypothetical protein	bi	1	979	fig|573.2212.peg.979	100	FIG00732260: hypothetical protein	bi	1	4015	fig|573.2215.peg.4015	100	FIG00732260: hypothetical protein	bi	1	2536	fig|573.2241.peg.2536	100	FIG00732260: hypothetical protein
1	960	343	fig|573.1888.peg.960	2-Oxobutyrate oxidase, putative	bi	1	665	fig|573.2207.peg.665	100	2-Oxobutyrate oxidase, putative	bi	1	980	fig|573.2212.peg.980	100	2-Oxobutyrate oxidase, putative	bi	1	4014	fig|573.2215.peg.4014	100	2-Oxobutyrate oxidase, putative	bi	1	2535	fig|573.2241.peg.2535	99.71	2-Oxobutyrate oxidase, putative
1	961	269	fig|573.1888.peg.961	Methionine ABC transporter substrate-binding protein	bi	1	664	fig|573.2207.peg.664	100	Methionine ABC transporter substrate-binding protein	bi	1	981	fig|573.2212.peg.981	100	Methionine ABC transporter substrate-binding protein	bi	1	4013	fig|573.2215.peg.4013	100	Methionine ABC transporter substrate-binding protein	bi	1	2534	fig|573.2241.peg.2534	99.25	Methionine ABC transporter substrate-binding protein
1	962	264	fig|573.1888.peg.962	Methionine ABC transporter ATP-binding protein	bi	1	663	fig|573.2207.peg.663	100	Methionine ABC transporter ATP-binding protein	bi	1	982	fig|573.2212.peg.982	100	Methionine ABC transporter ATP-binding protein	bi	1	4012	fig|573.2215.peg.4012	100	Methionine ABC transporter ATP-binding protein	bi	1	2533	fig|573.2241.peg.2533	99.62	Methionine ABC transporter ATP-binding protein
1	963	224	fig|573.1888.peg.963	Methionine ABC transporter permease protein	bi	1	662	fig|573.2207.peg.662	100	Methionine ABC transporter permease protein	bi	1	983	fig|573.2212.peg.983	100	Methionine ABC transporter permease protein	bi	1	4011	fig|573.2215.peg.4011	100	Methionine ABC transporter permease protein	bi	1	2532	fig|573.2241.peg.2532	100	Methionine ABC transporter permease protein
1	964	388	fig|573.1888.peg.964	Enoyl-[acyl-carrier-protein] reductase [FMN] (EC 1.3.1.9)	bi	1	661	fig|573.2207.peg.661	100	Enoyl-[acyl-carrier-protein] reductase [FMN] (EC 1.3.1.9)	bi	1	984	fig|573.2212.peg.984	100	Enoyl-[acyl-carrier-protein] reductase [FMN] (EC 1.3.1.9)	bi	1	4010	fig|573.2215.peg.4010	100	Enoyl-[acyl-carrier-protein] reductase [FMN] (EC 1.3.1.9)	bi	1	2531	fig|573.2241.peg.2531	99.74	Enoyl-[acyl-carrier-protein] reductase [FMN] (EC 1.3.1.9)
1	965	282	fig|573.1888.peg.965	Chromosome initiation inhibitor	bi	1	660	fig|573.2207.peg.660	100	Chromosome initiation inhibitor	bi	1	985	fig|573.2212.peg.985	100	Chromosome initiation inhibitor	bi	1	4009	fig|573.2215.peg.4009	100	Chromosome initiation inhibitor	bi	1	2530	fig|573.2241.peg.2530	100	Chromosome initiation inhibitor
1	966	386	fig|573.1888.peg.966	Putative transport protein	bi	1	659	fig|573.2207.peg.659	100	Putative transport protein	bi	1	986	fig|573.2212.peg.986	100	Putative transport protein	bi	1	4008	fig|573.2215.peg.4008	99.74	Putative transport protein	bi	1	2529	fig|573.2241.peg.2529	99.22	Putative transport protein
1	967	141	fig|573.1888.peg.967	Prolyl endopeptidase (EC 3.4.21.26)	bi	1	658	fig|573.2207.peg.658	100	Prolyl endopeptidase (EC 3.4.21.26)	bi	1	987	fig|573.2212.peg.987	100	Prolyl endopeptidase (EC 3.4.21.26)	bi	1	4007	fig|573.2215.peg.4007	100	Prolyl endopeptidase (EC 3.4.21.26)	bi	1	2528	fig|573.2241.peg.2528	98.57	Prolyl endopeptidase (EC 3.4.21.26)
1	968	396	fig|573.1888.peg.968	Transporter, putative	bi	1	657	fig|573.2207.peg.657	100	Transporter, putative	bi	1	988	fig|573.2212.peg.988	100	Transporter, putative	bi	1	4006	fig|573.2215.peg.4006	100	Transporter, putative	bi	1	2527	fig|573.2241.peg.2527	99.48	Transporter, putative
1	969	97	fig|573.1888.peg.969	FIG00731804: hypothetical protein	bi	1	656	fig|573.2207.peg.656	100	FIG00731804: hypothetical protein	bi	1	989	fig|573.2212.peg.989	100	FIG00731804: hypothetical protein	bi	1	4005	fig|573.2215.peg.4005	100	FIG00731804: hypothetical protein	bi	1	2526	fig|573.2241.peg.2526	100	FIG00731804: hypothetical protein
1	970	254	fig|573.1888.peg.970	Trans-aconitate 2-methyltransferase (EC 2.1.1.144)	bi	1	655	fig|573.2207.peg.655	100	Trans-aconitate 2-methyltransferase (EC 2.1.1.144)	bi	1	990	fig|573.2212.peg.990	100	Trans-aconitate 2-methyltransferase (EC 2.1.1.144)	bi	1	4004	fig|573.2215.peg.4004	100	Trans-aconitate 2-methyltransferase (EC 2.1.1.144)	bi	1	2525	fig|573.2241.peg.2525	99.21	Trans-aconitate 2-methyltransferase (EC 2.1.1.144)
1	971	107	fig|573.1888.peg.971	4-carboxymuconolactone decarboxylase (EC 4.1.1.44)	bi	1	654	fig|573.2207.peg.654	100	4-carboxymuconolactone decarboxylase (EC 4.1.1.44)	bi	1	991	fig|573.2212.peg.991	100	4-carboxymuconolactone decarboxylase (EC 4.1.1.44)	bi	1	4003	fig|573.2215.peg.4003	100	4-carboxymuconolactone decarboxylase (EC 4.1.1.44)	bi	1	2524	fig|573.2241.peg.2524	100	4-carboxymuconolactone decarboxylase (EC 4.1.1.44)
1	972	127	fig|573.1888.peg.972	probable tautomerase	bi	1	653	fig|573.2207.peg.653	100	probable tautomerase	bi	1	992	fig|573.2212.peg.992	100	probable tautomerase	bi	1	4002	fig|573.2215.peg.4002	100	probable tautomerase	bi	1	2523	fig|573.2241.peg.2523	100	probable tautomerase
1	973	65	fig|573.1888.peg.973	hypothetical protein	bi	1	652	fig|573.2207.peg.652	100	hypothetical protein	bi	1	993	fig|573.2212.peg.993	100	hypothetical protein	bi	1	4001	fig|573.2215.peg.4001	100	hypothetical protein	bi	1	2522	fig|573.2241.peg.2522	100	hypothetical protein
1	974	60	fig|573.1888.peg.974	probable tautomerase	bi	1	651	fig|573.2207.peg.651	100	probable tautomerase	bi	1	994	fig|573.2212.peg.994	100	probable tautomerase	bi	1	4000	fig|573.2215.peg.4000	100	probable tautomerase	uni	1	2523	fig|573.2241.peg.2523	98.31	probable tautomerase
1	975	149	fig|573.1888.peg.975	GCN5-related N-acetyltransferase	bi	1	650	fig|573.2207.peg.650	100	GCN5-related N-acetyltransferase	bi	1	995	fig|573.2212.peg.995	100	GCN5-related N-acetyltransferase	bi	1	3999	fig|573.2215.peg.3999	100	GCN5-related N-acetyltransferase	bi	1	2519	fig|573.2241.peg.2519	100	GCN5-related N-acetyltransferase
1	976	484	fig|573.1888.peg.976	Altronate oxidoreductase (EC 1.1.1.58)	bi	1	649	fig|573.2207.peg.649	100	Altronate oxidoreductase (EC 1.1.1.58)	bi	1	996	fig|573.2212.peg.996	100	Altronate oxidoreductase (EC 1.1.1.58)	bi	1	3998	fig|573.2215.peg.3998	100	Altronate oxidoreductase (EC 1.1.1.58)	bi	1	2518	fig|573.2241.peg.2518	99.79	Altronate oxidoreductase (EC 1.1.1.58)
1	977	177	fig|573.1888.peg.977	GCN5-related N-acetyltransferase	bi	1	648	fig|573.2207.peg.648	100	GCN5-related N-acetyltransferase	bi	1	997	fig|573.2212.peg.997	99.43	GCN5-related N-acetyltransferase	bi	1	3997	fig|573.2215.peg.3997	100	GCN5-related N-acetyltransferase	bi	1	2517	fig|573.2241.peg.2517	99.43	GCN5-related N-acetyltransferase
1	978	475	fig|573.1888.peg.978	FIG00731729: hypothetical protein	bi	1	647	fig|573.2207.peg.647	100	FIG00731729: hypothetical protein	bi	1	998	fig|573.2212.peg.998	100	FIG00731729: hypothetical protein	bi	1	3996	fig|573.2215.peg.3996	100	FIG00731729: hypothetical protein	bi	1	2516	fig|573.2241.peg.2516	99.79	FIG00731729: hypothetical protein
1	979	123	fig|573.1888.peg.979	FIG00732015: hypothetical protein	bi	1	646	fig|573.2207.peg.646	100	FIG00732015: hypothetical protein	bi	1	999	fig|573.2212.peg.999	100	FIG00732015: hypothetical protein	bi	1	3995	fig|573.2215.peg.3995	100	FIG00732015: hypothetical protein	bi	1	2515	fig|573.2241.peg.2515	100	FIG00732015: hypothetical protein
1	980	309	fig|573.1888.peg.980	Glutaminase (EC 3.5.1.2)	bi	1	645	fig|573.2207.peg.645	100	Glutaminase (EC 3.5.1.2)	bi	1	1000	fig|573.2212.peg.1000	100	Glutaminase (EC 3.5.1.2)	bi	1	3994	fig|573.2215.peg.3994	100	Glutaminase (EC 3.5.1.2)	bi	1	2514	fig|573.2241.peg.2514	99.35	Glutaminase (EC 3.5.1.2)
1	981	463	fig|573.1888.peg.981	Succinate-semialdehyde dehydrogenase [NAD] (EC 1.2.1.24); Succinate-semialdehyde dehydrogenase [NAD(P)+] (EC 1.2.1.16)	bi	1	644	fig|573.2207.peg.644	100	Succinate-semialdehyde dehydrogenase [NAD] (EC 1.2.1.24); Succinate-semialdehyde dehydrogenase [NAD(P)+] (EC 1.2.1.16)	bi	1	1001	fig|573.2212.peg.1001	100	Succinate-semialdehyde dehydrogenase [NAD] (EC 1.2.1.24); Succinate-semialdehyde dehydrogenase [NAD(P)+] (EC 1.2.1.16)	bi	1	3993	fig|573.2215.peg.3993	100	Succinate-semialdehyde dehydrogenase [NAD] (EC 1.2.1.24); Succinate-semialdehyde dehydrogenase [NAD(P)+] (EC 1.2.1.16)	bi	1	2513	fig|573.2241.peg.2513	99.78	Succinate-semialdehyde dehydrogenase [NAD] (EC 1.2.1.24); Succinate-semialdehyde dehydrogenase [NAD(P)+] (EC 1.2.1.16)
1	982	293	fig|573.1888.peg.982	LysR family transcriptional regulator YneJ	bi	1	643	fig|573.2207.peg.643	100	LysR family transcriptional regulator YneJ	bi	1	1002	fig|573.2212.peg.1002	100	LysR family transcriptional regulator YneJ	bi	1	3992	fig|573.2215.peg.3992	100	LysR family transcriptional regulator YneJ	bi	1	2512	fig|573.2241.peg.2512	99.66	LysR family transcriptional regulator YneJ
1	983	161	fig|573.1888.peg.983	GCN5-related N-acetyltransferase	bi	1	642	fig|573.2207.peg.642	100	GCN5-related N-acetyltransferase	bi	1	1003	fig|573.2212.peg.1003	100	GCN5-related N-acetyltransferase	bi	1	3991	fig|573.2215.peg.3991	99.38	GCN5-related N-acetyltransferase	bi	1	2511	fig|573.2241.peg.2511	99.38	GCN5-related N-acetyltransferase
1	984	315	fig|573.1888.peg.984	L-lactate dehydrogenase (EC 1.1.1.27)	bi	1	641	fig|573.2207.peg.641	100	L-lactate dehydrogenase (EC 1.1.1.27)	bi	1	1004	fig|573.2212.peg.1004	100	L-lactate dehydrogenase (EC 1.1.1.27)	bi	1	3990	fig|573.2215.peg.3990	100	L-lactate dehydrogenase (EC 1.1.1.27)	bi	1	2510	fig|573.2241.peg.2510	100	L-lactate dehydrogenase (EC 1.1.1.27)
1	985	254	fig|573.1888.peg.985	Glycerol-3-phosphate regulon repressor	bi	1	640	fig|573.2207.peg.640	100	Glycerol-3-phosphate regulon repressor	bi	1	1005	fig|573.2212.peg.1005	100	Glycerol-3-phosphate regulon repressor	bi	1	3989	fig|573.2215.peg.3989	100	Glycerol-3-phosphate regulon repressor	bi	1	2509	fig|573.2241.peg.2509	100	Glycerol-3-phosphate regulon repressor
1	986	329	fig|573.1888.peg.986	4-hydroxythreonine-4-phosphate dehydrogenase (EC 1.1.1.262)	bi	1	639	fig|573.2207.peg.639	100	4-hydroxythreonine-4-phosphate dehydrogenase (EC 1.1.1.262)	bi	1	1006	fig|573.2212.peg.1006	100	4-hydroxythreonine-4-phosphate dehydrogenase (EC 1.1.1.262)	bi	1	3988	fig|573.2215.peg.3988	100	4-hydroxythreonine-4-phosphate dehydrogenase (EC 1.1.1.262)	bi	1	2508	fig|573.2241.peg.2508	100	4-hydroxythreonine-4-phosphate dehydrogenase (EC 1.1.1.262)
1	987	412	fig|573.1888.peg.987	Candidate type III effector Hop protein	bi	1	638	fig|573.2207.peg.638	100	Candidate type III effector Hop protein	bi	1	1007	fig|573.2212.peg.1007	100	Candidate type III effector Hop protein	bi	1	3987	fig|573.2215.peg.3987	100	Candidate type III effector Hop protein	bi	1	2507	fig|573.2241.peg.2507	97.81	Candidate type III effector Hop protein
1	988	383	fig|573.1888.peg.988	Alcohol dehydrogenase (EC 1.1.1.1)	bi	1	637	fig|573.2207.peg.637	100	Alcohol dehydrogenase (EC 1.1.1.1)	bi	1	1008	fig|573.2212.peg.1008	99.74	Alcohol dehydrogenase (EC 1.1.1.1)	bi	1	3986	fig|573.2215.peg.3986	100	Alcohol dehydrogenase (EC 1.1.1.1)	bi	1	2506	fig|573.2241.peg.2506	99.48	Alcohol dehydrogenase (EC 1.1.1.1)
1	989	295	fig|573.1888.peg.989	4-hydroxy-tetrahydrodipicolinate synthase (EC 4.3.3.7)	bi	1	636	fig|573.2207.peg.636	100	4-hydroxy-tetrahydrodipicolinate synthase (EC 4.3.3.7)	bi	1	1009	fig|573.2212.peg.1009	100	4-hydroxy-tetrahydrodipicolinate synthase (EC 4.3.3.7)	bi	1	3985	fig|573.2215.peg.3985	100	4-hydroxy-tetrahydrodipicolinate synthase (EC 4.3.3.7)	bi	1	2505	fig|573.2241.peg.2505	98.63	4-hydroxy-tetrahydrodipicolinate synthase (EC 4.3.3.7)
1	990	317	fig|573.1888.peg.990	D-3-phosphoglycerate dehydrogenase (EC 1.1.1.95)	bi	1	635	fig|573.2207.peg.635	100	D-3-phosphoglycerate dehydrogenase (EC 1.1.1.95)	bi	1	1010	fig|573.2212.peg.1010	100	D-3-phosphoglycerate dehydrogenase (EC 1.1.1.95)	bi	1	3984	fig|573.2215.peg.3984	100	D-3-phosphoglycerate dehydrogenase (EC 1.1.1.95)	uni	1	4354	fig|573.2241.peg.4354	38.11	D-3-phosphoglycerate dehydrogenase (EC 1.1.1.95)
1	991	423	fig|573.1888.peg.991	Hexuronate transporter	bi	1	634	fig|573.2207.peg.634	100	Hexuronate transporter	bi	1	1011	fig|573.2212.peg.1011	100	Hexuronate transporter	bi	1	3983	fig|573.2215.peg.3983	100	Hexuronate transporter	uni	1	3024	fig|573.2241.peg.3024	37.38	4-hydroxyphenylpyruvate dioxygenase (EC 1.13.11.27)
1	992	265	fig|573.1888.peg.992	Phenazine biosynthesis protein PhzF	bi	1	633	fig|573.2207.peg.633	100	Phenazine biosynthesis protein PhzF	bi	1	1012	fig|573.2212.peg.1012	100	Phenazine biosynthesis protein PhzF	bi	1	3982	fig|573.2215.peg.3982	100	Phenazine biosynthesis protein PhzF	bi	1	2500	fig|573.2241.peg.2500	99.24	Phenazine biosynthesis protein PhzF
1	993	385	fig|573.1888.peg.993	Sugar efflux transporter SotB	bi	1	632	fig|573.2207.peg.632	100	Sugar efflux transporter SotB	bi	1	1013	fig|573.2212.peg.1013	100	Sugar efflux transporter SotB	bi	1	3981	fig|573.2215.peg.3981	100	Sugar efflux transporter SotB	bi	1	2499	fig|573.2241.peg.2499	100	Sugar efflux transporter SotB
1	994	223	fig|573.1888.peg.994	Multiple antibiotic resistance protein MarC	bi	1	631	fig|573.2207.peg.631	100	Multiple antibiotic resistance protein MarC	bi	1	1014	fig|573.2212.peg.1014	100	Multiple antibiotic resistance protein MarC	bi	1	3980	fig|573.2215.peg.3980	100	Multiple antibiotic resistance protein MarC	bi	1	2498	fig|573.2241.peg.2498	100	Multiple antibiotic resistance protein MarC
1	995	43	fig|573.1888.peg.995	hypothetical protein	bi	1	630	fig|573.2207.peg.630	100	hypothetical protein	bi	1	1015	fig|573.2212.peg.1015	100	hypothetical protein	bi	1	3979	fig|573.2215.peg.3979	100	hypothetical protein	bi	1	2497	fig|573.2241.peg.2497	100	hypothetical protein
1	996	145	fig|573.1888.peg.996	Multiple antibiotic resistance protein MarR	bi	1	629	fig|573.2207.peg.629	100	Multiple antibiotic resistance protein MarR	bi	1	1016	fig|573.2212.peg.1016	100	Multiple antibiotic resistance protein MarR	bi	1	3978	fig|573.2215.peg.3978	100	Multiple antibiotic resistance protein MarR	bi	1	2496	fig|573.2241.peg.2496	99.31	Multiple antibiotic resistance protein MarR
1	997	125	fig|573.1888.peg.997	Multiple antibiotic resistance protein MarA	bi	1	628	fig|573.2207.peg.628	100	Multiple antibiotic resistance protein MarA	bi	1	1017	fig|573.2212.peg.1017	100	Multiple antibiotic resistance protein MarA	bi	1	3977	fig|573.2215.peg.3977	100	Multiple antibiotic resistance protein MarA	bi	1	2495	fig|573.2241.peg.2495	100	Multiple antibiotic resistance protein MarA
1	998	73	fig|573.1888.peg.998	Multiple antibiotic resistance protein MarB	bi	1	627	fig|573.2207.peg.627	100	Multiple antibiotic resistance protein MarB	bi	1	1018	fig|573.2212.peg.1018	100	Multiple antibiotic resistance protein MarB	bi	1	3976	fig|573.2215.peg.3976	100	Multiple antibiotic resistance protein MarB	bi	1	2494	fig|573.2241.peg.2494	100	Multiple antibiotic resistance protein MarB
1	999	300	fig|573.1888.peg.999	Permease of the drug/metabolite transporter (DMT) superfamily	bi	1	626	fig|573.2207.peg.626	100	Permease of the drug/metabolite transporter (DMT) superfamily	bi	1	1019	fig|573.2212.peg.1019	100	Permease of the drug/metabolite transporter (DMT) superfamily	bi	1	3975	fig|573.2215.peg.3975	100	Permease of the drug/metabolite transporter (DMT) superfamily	bi	1	2493	fig|573.2241.peg.2493	99.33	Permease of the drug/metabolite transporter (DMT) superfamily
1	1000	399	fig|573.1888.peg.1000	Putative transport protein	bi	1	625	fig|573.2207.peg.625	100	Putative transport protein	bi	1	1020	fig|573.2212.peg.1020	100	Putative transport protein	bi	1	3974	fig|573.2215.peg.3974	100	Putative transport protein	bi	1	2492	fig|573.2241.peg.2492	100	Putative transport protein
1	1001	161	fig|573.1888.peg.1001	FIG00731432: hypothetical protein	bi	1	624	fig|573.2207.peg.624	99.38	FIG00731432: hypothetical protein	bi	1	1021	fig|573.2212.peg.1021	99.38	FIG00731432: hypothetical protein	bi	1	3973	fig|573.2215.peg.3973	99.38	FIG00731432: hypothetical protein	bi	1	2491	fig|573.2241.peg.2491	99.38	FIG00731432: hypothetical protein
1	1002	233	fig|573.1888.peg.1002	Urea ABC transporter, ATPase protein UrtE	bi	1	623	fig|573.2207.peg.623	100	Urea ABC transporter, ATPase protein UrtE	bi	1	1022	fig|573.2212.peg.1022	99.57	Urea ABC transporter, ATPase protein UrtE	bi	1	3972	fig|573.2215.peg.3972	100	Urea ABC transporter, ATPase protein UrtE	bi	1	2490	fig|573.2241.peg.2490	99.14	Urea ABC transporter, ATPase protein UrtE
1	1003	266	fig|573.1888.peg.1003	Urea ABC transporter, ATPase protein UrtD	bi	1	622	fig|573.2207.peg.622	100	Urea ABC transporter, ATPase protein UrtD	bi	1	1023	fig|573.2212.peg.1023	100	Urea ABC transporter, ATPase protein UrtD	bi	1	3971	fig|573.2215.peg.3971	100	Urea ABC transporter, ATPase protein UrtD	bi	1	2489	fig|573.2241.peg.2489	100	Urea ABC transporter, ATPase protein UrtD
1	1004	358	fig|573.1888.peg.1004	Urea ABC transporter, permease protein UrtC	bi	1	621	fig|573.2207.peg.621	100	Urea ABC transporter, permease protein UrtC	bi	1	1024	fig|573.2212.peg.1024	100	Urea ABC transporter, permease protein UrtC	bi	1	3970	fig|573.2215.peg.3970	100	Urea ABC transporter, permease protein UrtC	bi	1	2488	fig|573.2241.peg.2488	99.72	Urea ABC transporter, permease protein UrtC
1	1005	525	fig|573.1888.peg.1005	Urea ABC transporter, permease protein UrtB	bi	1	620	fig|573.2207.peg.620	100	Urea ABC transporter, permease protein UrtB	bi	1	1025	fig|573.2212.peg.1025	100	Urea ABC transporter, permease protein UrtB	bi	1	3969	fig|573.2215.peg.3969	100	Urea ABC transporter, permease protein UrtB	bi	1	2487	fig|573.2241.peg.2487	99.24	Urea ABC transporter, permease protein UrtB
1	1006	424	fig|573.1888.peg.1006	Urea ABC transporter, substrate binding protein UrtA	bi	1	619	fig|573.2207.peg.619	99.76	Urea ABC transporter, substrate binding protein UrtA	bi	1	1026	fig|573.2212.peg.1026	99.76	Urea ABC transporter, substrate binding protein UrtA	bi	1	3968	fig|573.2215.peg.3968	99.76	Urea ABC transporter, substrate binding protein UrtA	bi	1	2486	fig|573.2241.peg.2486	99.29	Urea ABC transporter, substrate binding protein UrtA
1	1007	368	fig|573.1888.peg.1007	Methionine synthase II (cobalamin-independent)	bi	1	618	fig|573.2207.peg.618	100	Methionine synthase II (cobalamin-independent)	bi	1	1027	fig|573.2212.peg.1027	99.73	Methionine synthase II (cobalamin-independent)	bi	1	3967	fig|573.2215.peg.3967	99.73	Methionine synthase II (cobalamin-independent)	bi	1	2485	fig|573.2241.peg.2485	99.73	Methionine synthase II (cobalamin-independent)
1	1008	133	fig|573.1888.peg.1008	Rhodanese-related sulfurtransferase	bi	1	617	fig|573.2207.peg.617	100	Rhodanese-related sulfurtransferase	bi	1	1028	fig|573.2212.peg.1028	100	Rhodanese-related sulfurtransferase	bi	1	3966	fig|573.2215.peg.3966	100	Rhodanese-related sulfurtransferase	bi	1	2484	fig|573.2241.peg.2484	100	Rhodanese-related sulfurtransferase
1	1009	366	fig|573.1888.peg.1009	Transcriptional regulator, AraC family	bi	1	616	fig|573.2207.peg.616	100	Transcriptional regulator, AraC family	bi	1	1029	fig|573.2212.peg.1029	99.72	Transcriptional regulator, AraC family	bi	1	3965	fig|573.2215.peg.3965	100	Transcriptional regulator, AraC family	bi	1	2483	fig|573.2241.peg.2483	99.73	Transcriptional regulator, AraC family
1	1010	73	fig|573.1888.peg.1010	FIG00731987: hypothetical protein	bi	1	615	fig|573.2207.peg.615	100	FIG00731987: hypothetical protein	bi	1	1030	fig|573.2212.peg.1030	100	FIG00731987: hypothetical protein	bi	1	3964	fig|573.2215.peg.3964	100	FIG00731987: hypothetical protein	bi	1	2482	fig|573.2241.peg.2482	100	FIG00731987: hypothetical protein
1	1011	147	fig|573.1888.peg.1011	FIG00731600: hypothetical protein	bi	1	614	fig|573.2207.peg.614	100	FIG00731600: hypothetical protein	bi	1	1031	fig|573.2212.peg.1031	100	FIG00731600: hypothetical protein	bi	1	3963	fig|573.2215.peg.3963	100	FIG00731600: hypothetical protein	bi	1	2481	fig|573.2241.peg.2481	99.32	FIG00731600: hypothetical protein
1	1012	55	fig|573.1888.peg.1012	hypothetical protein	-				0		-				0		bi	1	3962	fig|573.2215.peg.3962	100	hypothetical protein	bi	1	2480	fig|573.2241.peg.2480	100	hypothetical protein
1	1013	355	fig|573.1888.peg.1013	Transcriptional repressor of the lac operon	bi	1	613	fig|573.2207.peg.613	100	Transcriptional repressor of the lac operon	bi	1	1032	fig|573.2212.peg.1032	100	Transcriptional repressor of the lac operon	bi	1	3960	fig|573.2215.peg.3960	100	Transcriptional repressor of the lac operon	bi	1	2479	fig|573.2241.peg.2479	99.44	Transcriptional repressor of the lac operon
1	1014	1036	fig|573.1888.peg.1014	Beta-galactosidase (EC 3.2.1.23)	bi	1	612	fig|573.2207.peg.612	100	Beta-galactosidase (EC 3.2.1.23)	bi	1	1033	fig|573.2212.peg.1033	100	Beta-galactosidase (EC 3.2.1.23)	bi	1	3959	fig|573.2215.peg.3959	100	Beta-galactosidase (EC 3.2.1.23)	bi	1	2478	fig|573.2241.peg.2478	99.81	Beta-galactosidase (EC 3.2.1.23)
1	1015	422	fig|573.1888.peg.1015	Lactose permease	bi	1	611	fig|573.2207.peg.611	100	Lactose permease	uni	1	3302	fig|573.2212.peg.3302	59.95	Lactose permease	bi	1	3958	fig|573.2215.peg.3958	100	Lactose permease	bi	1	2477	fig|573.2241.peg.2477	99.76	Lactose permease
1	1016	363	fig|573.1888.peg.1016	putative RecF protein	bi	1	610	fig|573.2207.peg.610	100	putative RecF protein	-				0		bi	1	3957	fig|573.2215.peg.3957	100	putative RecF protein	bi	1	2476	fig|573.2241.peg.2476	99.72	putative RecF protein
1	1017	87	fig|573.1888.peg.1017	FIG00732096: hypothetical protein	bi	1	609	fig|573.2207.peg.609	100	FIG00732096: hypothetical protein	-				0		bi	1	3956	fig|573.2215.peg.3956	100	FIG00732096: hypothetical protein	bi	1	2475	fig|573.2241.peg.2475	98.84	FIG00732096: hypothetical protein
1	1018	287	fig|573.1888.peg.1018	Beta-lactamase (EC 3.5.2.6)	bi	1	608	fig|573.2207.peg.608	100	Beta-lactamase (EC 3.5.2.6)	bi	1	1034	fig|573.2212.peg.1034	100	Beta-lactamase (EC 3.5.2.6)	bi	1	3955	fig|573.2215.peg.3955	100	Beta-lactamase (EC 3.5.2.6)	bi	1	2474	fig|573.2241.peg.2474	99.3	Beta-lactamase (EC 3.5.2.6)
1	1019	254	fig|573.1888.peg.1019	Glycerol-3-phosphate regulon repressor, DeoR family	bi	1	607	fig|573.2207.peg.607	100	Glycerol-3-phosphate regulon repressor, DeoR family	bi	1	1035	fig|573.2212.peg.1035	100	Glycerol-3-phosphate regulon repressor, DeoR family	bi	1	3954	fig|573.2215.peg.3954	100	Glycerol-3-phosphate regulon repressor, DeoR family	bi	1	2473	fig|573.2241.peg.2473	100	Glycerol-3-phosphate regulon repressor, DeoR family
1	1020	301	fig|573.1888.peg.1020	D-beta-hydroxybutyrate dehydrogenase (EC 1.1.1.30)	bi	1	606	fig|573.2207.peg.606	100	D-beta-hydroxybutyrate dehydrogenase (EC 1.1.1.30)	bi	1	1036	fig|573.2212.peg.1036	100	D-beta-hydroxybutyrate dehydrogenase (EC 1.1.1.30)	bi	1	3953	fig|573.2215.peg.3953	100	D-beta-hydroxybutyrate dehydrogenase (EC 1.1.1.30)	bi	1	2472	fig|573.2241.peg.2472	99.67	D-beta-hydroxybutyrate dehydrogenase (EC 1.1.1.30)
1	1021	220	fig|573.1888.peg.1021	FIG00641944: hypothetical protein	bi	1	605	fig|573.2207.peg.605	100	FIG00641944: hypothetical protein	bi	1	1037	fig|573.2212.peg.1037	100	FIG00641944: hypothetical protein	bi	1	3952	fig|573.2215.peg.3952	100	FIG00641944: hypothetical protein	bi	1	2471	fig|573.2241.peg.2471	99.09	FIG00641944: hypothetical protein
1	1022	207	fig|573.1888.peg.1022	Ribulose-5-phosphate 4-epimerase and related epimerases and aldolases	bi	1	604	fig|573.2207.peg.604	100	Ribulose-5-phosphate 4-epimerase and related epimerases and aldolases	bi	1	1038	fig|573.2212.peg.1038	99.51	Ribulose-5-phosphate 4-epimerase and related epimerases and aldolases	bi	1	3951	fig|573.2215.peg.3951	99.51	Ribulose-5-phosphate 4-epimerase and related epimerases and aldolases	bi	1	2470	fig|573.2241.peg.2470	99.51	Ribulose-5-phosphate 4-epimerase and related epimerases and aldolases
1	1023	261	fig|573.1888.peg.1023	Hydroxypyruvate isomerase (EC 5.3.1.22)	bi	1	603	fig|573.2207.peg.603	100	Hydroxypyruvate isomerase (EC 5.3.1.22)	bi	1	1039	fig|573.2212.peg.1039	100	Hydroxypyruvate isomerase (EC 5.3.1.22)	bi	1	3950	fig|573.2215.peg.3950	100	Hydroxypyruvate isomerase (EC 5.3.1.22)	bi	1	2469	fig|573.2241.peg.2469	99.23	Hydroxypyruvate isomerase (EC 5.3.1.22)
1	1024	455	fig|573.1888.peg.1024	Gluconate permease	bi	1	602	fig|573.2207.peg.602	100	Gluconate permease	bi	1	1040	fig|573.2212.peg.1040	100	Gluconate permease	bi	1	3949	fig|573.2215.peg.3949	100	Gluconate permease	bi	1	2468	fig|573.2241.peg.2468	100	Gluconate permease
1	1025	309	fig|573.1888.peg.1025	Right origin-binding protein	bi	1	601	fig|573.2207.peg.601	100	Right origin-binding protein	bi	1	1041	fig|573.2212.peg.1041	100	Right origin-binding protein	bi	1	3948	fig|573.2215.peg.3948	100	Right origin-binding protein	bi	1	2467	fig|573.2241.peg.2467	99.03	Right origin-binding protein
1	1026	204	fig|573.1888.peg.1026	putative 2-component transcriptional regulator	bi	1	600	fig|573.2207.peg.600	100	putative 2-component transcriptional regulator	bi	1	1042	fig|573.2212.peg.1042	100	putative 2-component transcriptional regulator	bi	1	3947	fig|573.2215.peg.3947	100	putative 2-component transcriptional regulator	bi	1	2466	fig|573.2241.peg.2466	99.51	putative 2-component transcriptional regulator
1	1027	406	fig|573.1888.peg.1027	Diguanylate cyclase/phosphodiesterase domain 2 (EAL)	bi	1	599	fig|573.2207.peg.599	100	Diguanylate cyclase/phosphodiesterase domain 2 (EAL)	bi	1	1043	fig|573.2212.peg.1043	100	Diguanylate cyclase/phosphodiesterase domain 2 (EAL)	bi	1	3946	fig|573.2215.peg.3946	100	Diguanylate cyclase/phosphodiesterase domain 2 (EAL)	bi	1	2465	fig|573.2241.peg.2465	99.75	Diguanylate cyclase/phosphodiesterase domain 2 (EAL)
1	1028	171	fig|573.1888.peg.1028	C-terminal domain of CinA paralog, YdeJ	bi	1	598	fig|573.2207.peg.598	100	C-terminal domain of CinA paralog, YdeJ	bi	1	1044	fig|573.2212.peg.1044	100	C-terminal domain of CinA paralog, YdeJ	bi	1	3945	fig|573.2215.peg.3945	100	C-terminal domain of CinA paralog, YdeJ	bi	1	2464	fig|573.2241.peg.2464	98.82	C-terminal domain of CinA paralog, YdeJ
1	1029	158	fig|573.1888.peg.1029	Small heat shock protein	bi	1	597	fig|573.2207.peg.597	100	Small heat shock protein	bi	1	1045	fig|573.2212.peg.1045	100	Small heat shock protein	bi	1	3944	fig|573.2215.peg.3944	100	Small heat shock protein	bi	1	2463	fig|573.2241.peg.2463	100	Small heat shock protein
1	1030	45	fig|573.1888.peg.1030	hypothetical protein	bi	1	596	fig|573.2207.peg.596	100	hypothetical protein	bi	1	1046	fig|573.2212.peg.1046	100	hypothetical protein	bi	1	3943	fig|573.2215.peg.3943	100	hypothetical protein	-				0
1	1031	212	fig|573.1888.peg.1031	putative 2-component transcriptional regulator	bi	1	595	fig|573.2207.peg.595	100	putative 2-component transcriptional regulator	bi	1	1047	fig|573.2212.peg.1047	100	putative 2-component transcriptional regulator	bi	1	3942	fig|573.2215.peg.3942	100	putative 2-component transcriptional regulator	bi	1	2462	fig|573.2241.peg.2462	97.63	putative 2-component transcriptional regulator
1	1032	225	fig|573.1888.peg.1032	Gifsy-2 prophage protein	bi	1	594	fig|573.2207.peg.594	100	Gifsy-2 prophage protein	bi	1	1048	fig|573.2212.peg.1048	99.55	Gifsy-2 prophage protein	bi	1	3939	fig|573.2215.peg.3939	99.55	Gifsy-2 prophage protein	bi	1	2459	fig|573.2241.peg.2459	97.32	Gifsy-2 prophage protein
1	1033	39	fig|573.1888.peg.1033	hypothetical protein	bi	1	593	fig|573.2207.peg.593	100	hypothetical protein	bi	1	1050	fig|573.2212.peg.1050	100	hypothetical protein	bi	1	3938	fig|573.2215.peg.3938	100	hypothetical protein	bi	1	2458	fig|573.2241.peg.2458	97.37	hypothetical protein
1	1034	682	fig|573.1888.peg.1034	Dipeptidyl carboxypeptidase Dcp (EC 3.4.15.5)	bi	1	592	fig|573.2207.peg.592	100	Dipeptidyl carboxypeptidase Dcp (EC 3.4.15.5)	bi	1	1051	fig|573.2212.peg.1051	99.85	Dipeptidyl carboxypeptidase Dcp (EC 3.4.15.5)	bi	1	3937	fig|573.2215.peg.3937	99.85	Dipeptidyl carboxypeptidase Dcp (EC 3.4.15.5)	bi	1	2457	fig|573.2241.peg.2457	99.56	Dipeptidyl carboxypeptidase Dcp (EC 3.4.15.5)
1	1035	250	fig|573.1888.peg.1035	3-hydroxypropionate dehydrogenase (EC 1.1.1.298)	bi	1	591	fig|573.2207.peg.591	100	3-hydroxypropionate dehydrogenase (EC 1.1.1.298)	bi	1	1052	fig|573.2212.peg.1052	100	3-hydroxypropionate dehydrogenase (EC 1.1.1.298)	bi	1	3936	fig|573.2215.peg.3936	100	3-hydroxypropionate dehydrogenase (EC 1.1.1.298)	bi	1	2456	fig|573.2241.peg.2456	100	3-hydroxypropionate dehydrogenase (EC 1.1.1.298)
1	1036	229	fig|573.1888.peg.1036	Transcriptional regulator, GntR family	bi	1	590	fig|573.2207.peg.590	100	Transcriptional regulator, GntR family	bi	1	1053	fig|573.2212.peg.1053	100	Transcriptional regulator, GntR family	bi	1	3935	fig|573.2215.peg.3935	100	Transcriptional regulator, GntR family	bi	1	2455	fig|573.2241.peg.2455	100	Transcriptional regulator, GntR family
1	1037	144	fig|573.1888.peg.1037	Universal stress protein G	bi	1	589	fig|573.2207.peg.589	100	Universal stress protein G	bi	1	1054	fig|573.2212.peg.1054	100	Universal stress protein G	bi	1	3934	fig|573.2215.peg.3934	100	Universal stress protein G	bi	1	2454	fig|573.2241.peg.2454	100	Universal stress protein G
1	1038	488	fig|573.1888.peg.1038	D-mannonate oxidoreductase (EC 1.1.1.57)	bi	1	588	fig|573.2207.peg.588	100	D-mannonate oxidoreductase (EC 1.1.1.57)	bi	1	1055	fig|573.2212.peg.1055	100	D-mannonate oxidoreductase (EC 1.1.1.57)	bi	1	3933	fig|573.2215.peg.3933	100	D-mannonate oxidoreductase (EC 1.1.1.57)	bi	1	2453	fig|573.2241.peg.2453	99.38	D-mannonate oxidoreductase (EC 1.1.1.57)
1	1039	428	fig|573.1888.peg.1039	D-galactonate transporter	bi	1	587	fig|573.2207.peg.587	100	D-galactonate transporter	bi	1	1056	fig|573.2212.peg.1056	100	D-galactonate transporter	bi	1	3932	fig|573.2215.peg.3932	100	D-galactonate transporter	bi	1	2452	fig|573.2241.peg.2452	99.77	D-galactonate transporter
1	1040	129	fig|573.1888.peg.1040	Protein of unknown function UPF0060	bi	1	585	fig|573.2207.peg.585	100	Protein of unknown function UPF0060	bi	1	1058	fig|573.2212.peg.1058	100	Protein of unknown function UPF0060	bi	1	3930	fig|573.2215.peg.3930	100	Protein of unknown function UPF0060	bi	1	2451	fig|573.2241.peg.2451	97.5	Protein of unknown function UPF0060
1	1041	114	fig|573.1888.peg.1041	putative secreted protein	bi	1	584	fig|573.2207.peg.584	100	putative secreted protein	bi	1	1059	fig|573.2212.peg.1059	100	putative secreted protein	bi	1	3929	fig|573.2215.peg.3929	100	putative secreted protein	bi	1	2450	fig|573.2241.peg.2450	100	putative secreted protein
1	1042	187	fig|573.1888.peg.1042	Spermidine N1-acetyltransferase (EC 2.3.1.57)	bi	1	583	fig|573.2207.peg.583	100	Spermidine N1-acetyltransferase (EC 2.3.1.57)	bi	1	1064	fig|573.2212.peg.1064	100	Spermidine N1-acetyltransferase (EC 2.3.1.57)	bi	1	3928	fig|573.2215.peg.3928	100	Spermidine N1-acetyltransferase (EC 2.3.1.57)	bi	1	2449	fig|573.2241.peg.2449	99.46	Spermidine N1-acetyltransferase (EC 2.3.1.57)
1	1043	237	fig|573.1888.peg.1043	Hypothetical UPF0257 lipoprotein ynfC precursor	bi	1	582	fig|573.2207.peg.582	100	Hypothetical UPF0257 lipoprotein ynfC precursor	bi	1	1065	fig|573.2212.peg.1065	100	Hypothetical UPF0257 lipoprotein ynfC precursor	bi	1	3927	fig|573.2215.peg.3927	100	Hypothetical UPF0257 lipoprotein ynfC precursor	bi	1	2448	fig|573.2241.peg.2448	98.73	Hypothetical UPF0257 lipoprotein ynfC precursor
1	1044	90	fig|573.1888.peg.1044	Uncharacterized protein YnfE	bi	1	581	fig|573.2207.peg.581	100	Uncharacterized protein YnfE	bi	1	1066	fig|573.2212.peg.1066	100	Uncharacterized protein YnfE	bi	1	3926	fig|573.2215.peg.3926	100	Uncharacterized protein YnfE	bi	1	2447	fig|573.2241.peg.2447	100	Uncharacterized protein YnfE
1	1045	812	fig|573.1888.peg.1045	Anaerobic dimethyl sulfoxide reductase chain A (EC 1.8.99.-)	bi	1	580	fig|573.2207.peg.580	100	Anaerobic dimethyl sulfoxide reductase chain A (EC 1.8.99.-)	bi	1	1067	fig|573.2212.peg.1067	99.88	Anaerobic dimethyl sulfoxide reductase chain A (EC 1.8.99.-)	bi	1	3925	fig|573.2215.peg.3925	100	Anaerobic dimethyl sulfoxide reductase chain A (EC 1.8.99.-)	bi	1	2446	fig|573.2241.peg.2446	99.88	Anaerobic dimethyl sulfoxide reductase chain A (EC 1.8.99.-)
1	1046	206	fig|573.1888.peg.1046	Anaerobic dimethyl sulfoxide reductase chain B (EC 1.8.99.-)	uni	1	1693	fig|573.2207.peg.1693	99.51	Anaerobic dimethyl sulfoxide reductase chain B (EC 1.8.99.-)	bi	1	1068	fig|573.2212.peg.1068	100	Anaerobic dimethyl sulfoxide reductase chain B (EC 1.8.99.-)	bi	1	3924	fig|573.2215.peg.3924	100	Anaerobic dimethyl sulfoxide reductase chain B (EC 1.8.99.-)	bi	1	2445	fig|573.2241.peg.2445	100	Anaerobic dimethyl sulfoxide reductase chain B (EC 1.8.99.-)
1	1047	286	fig|573.1888.peg.1047	Anaerobic dimethyl sulfoxide reductase chain C (EC 1.8.99.-)	bi	1	578	fig|573.2207.peg.578	100	Anaerobic dimethyl sulfoxide reductase chain C (EC 1.8.99.-)	bi	1	1069	fig|573.2212.peg.1069	100	Anaerobic dimethyl sulfoxide reductase chain C (EC 1.8.99.-)	bi	1	3923	fig|573.2215.peg.3923	100	Anaerobic dimethyl sulfoxide reductase chain C (EC 1.8.99.-)	bi	1	2444	fig|573.2241.peg.2444	100	Anaerobic dimethyl sulfoxide reductase chain C (EC 1.8.99.-)
1	1048	203	fig|573.1888.peg.1048	Anaerobic dimethyl sulfoxide reductase chaperone DmsD	bi	1	577	fig|573.2207.peg.577	100	Anaerobic dimethyl sulfoxide reductase chaperone DmsD	bi	1	1070	fig|573.2212.peg.1070	100	Anaerobic dimethyl sulfoxide reductase chaperone DmsD	bi	1	3922	fig|573.2215.peg.3922	100	Anaerobic dimethyl sulfoxide reductase chaperone DmsD	bi	1	2443	fig|573.2241.peg.2443	99.01	Anaerobic dimethyl sulfoxide reductase chaperone DmsD
1	1049	432	fig|573.1888.peg.1049	FIG00509904: hypothetical protein	bi	1	576	fig|573.2207.peg.576	100	FIG00509904: hypothetical protein	bi	1	1071	fig|573.2212.peg.1071	100	FIG00509904: hypothetical protein	bi	1	3921	fig|573.2215.peg.3921	100	FIG00509904: hypothetical protein	bi	1	2442	fig|573.2241.peg.2442	100	FIG00509904: hypothetical protein
1	1050	199	fig|573.1888.peg.1050	Dethiobiotin synthetase (EC 6.3.3.3)	bi	1	575	fig|573.2207.peg.575	100	Dethiobiotin synthetase (EC 6.3.3.3)	bi	1	1072	fig|573.2212.peg.1072	100	Dethiobiotin synthetase (EC 6.3.3.3)	bi	1	3920	fig|573.2215.peg.3920	100	Dethiobiotin synthetase (EC 6.3.3.3)	bi	1	2441	fig|573.2241.peg.2441	100	Dethiobiotin synthetase (EC 6.3.3.3)
1	1051	408	fig|573.1888.peg.1051	Mlc, transcriptional repressor of MalT (the transcriptional activator of maltose regulon) and manXYZ operon	bi	1	574	fig|573.2207.peg.574	100	Mlc, transcriptional repressor of MalT (the transcriptional activator of maltose regulon) and manXYZ operon	bi	1	1073	fig|573.2212.peg.1073	100	Mlc, transcriptional repressor of MalT (the transcriptional activator of maltose regulon) and manXYZ operon	bi	1	3919	fig|573.2215.peg.3919	100	Mlc, transcriptional repressor of MalT (the transcriptional activator of maltose regulon) and manXYZ operon	bi	1	2440	fig|573.2241.peg.2440	100	Mlc, transcriptional repressor of MalT (the transcriptional activator of maltose regulon) and manXYZ operon
1	1052	301	fig|573.1888.peg.1052	LysR family transcriptional regulator YnfL	bi	1	573	fig|573.2207.peg.573	100	LysR family transcriptional regulator YnfL	bi	1	1074	fig|573.2212.peg.1074	100	LysR family transcriptional regulator YnfL	bi	1	3918	fig|573.2215.peg.3918	100	LysR family transcriptional regulator YnfL	bi	1	2439	fig|573.2241.peg.2439	100	LysR family transcriptional regulator YnfL
1	1053	417	fig|573.1888.peg.1053	Permeases of the major facilitator superfamily	bi	1	572	fig|573.2207.peg.572	100	Permeases of the major facilitator superfamily	bi	1	1075	fig|573.2212.peg.1075	100	Permeases of the major facilitator superfamily	bi	1	3917	fig|573.2215.peg.3917	100	Permeases of the major facilitator superfamily	bi	1	2438	fig|573.2241.peg.2438	100	Permeases of the major facilitator superfamily
1	1054	44	fig|573.1888.peg.1054	hypothetical protein	bi	1	571	fig|573.2207.peg.571	100	hypothetical protein	bi	1	1076	fig|573.2212.peg.1076	100	hypothetical protein	bi	1	3916	fig|573.2215.peg.3916	100	hypothetical protein	-				0
1	1055	496	fig|573.1888.peg.1055	Thermostable carboxypeptidase 1 (EC 3.4.17.19)	bi	1	570	fig|573.2207.peg.570	100	Thermostable carboxypeptidase 1 (EC 3.4.17.19)	bi	1	1077	fig|573.2212.peg.1077	100	Thermostable carboxypeptidase 1 (EC 3.4.17.19)	bi	1	3915	fig|573.2215.peg.3915	100	Thermostable carboxypeptidase 1 (EC 3.4.17.19)	bi	1	2437	fig|573.2241.peg.2437	100	Thermostable carboxypeptidase 1 (EC 3.4.17.19)
1	1056	140	fig|573.1888.peg.1056	Acid shock protein precursor	bi	1	569	fig|573.2207.peg.569	100	Acid shock protein precursor	bi	1	1078	fig|573.2212.peg.1078	100	Acid shock protein precursor	bi	1	3914	fig|573.2215.peg.3914	100	Acid shock protein precursor	bi	1	2436	fig|573.2241.peg.2436	100	Acid shock protein precursor
1	1057	48	fig|573.1888.peg.1057	hypothetical protein	bi	1	568	fig|573.2207.peg.568	100	hypothetical protein	bi	1	1079	fig|573.2212.peg.1079	100	hypothetical protein	bi	1	3913	fig|573.2215.peg.3913	100	hypothetical protein	bi	1	2435	fig|573.2241.peg.2435	97.87	hypothetical protein
1	1058	271	fig|573.1888.peg.1058	FIG00634494: possible peptidase	bi	1	567	fig|573.2207.peg.567	100	FIG00634494: possible peptidase	bi	1	1080	fig|573.2212.peg.1080	100	FIG00634494: possible peptidase	bi	1	3912	fig|573.2215.peg.3912	100	FIG00634494: possible peptidase	bi	1	2434	fig|573.2241.peg.2434	99.63	FIG00634494: possible peptidase
1	1059	39	fig|573.1888.peg.1059	hypothetical protein	bi	1	566	fig|573.2207.peg.566	100	hypothetical protein	bi	1	1081	fig|573.2212.peg.1081	100	hypothetical protein	bi	1	3911	fig|573.2215.peg.3911	100	hypothetical protein	bi	1	2433	fig|573.2241.peg.2433	97.37	hypothetical protein
1	1060	110	fig|573.1888.peg.1060	Spermidine export protein MdtI	bi	1	565	fig|573.2207.peg.565	100	Spermidine export protein MdtI	bi	1	1082	fig|573.2212.peg.1082	100	Spermidine export protein MdtI	bi	1	3910	fig|573.2215.peg.3910	100	Spermidine export protein MdtI	bi	1	2432	fig|573.2241.peg.2432	100	Spermidine export protein MdtI
1	1061	121	fig|573.1888.peg.1061	Spermidine export protein MdtJ	bi	1	564	fig|573.2207.peg.564	100	Spermidine export protein MdtJ	bi	1	1083	fig|573.2212.peg.1083	100	Spermidine export protein MdtJ	bi	1	3909	fig|573.2215.peg.3909	100	Spermidine export protein MdtJ	bi	1	2431	fig|573.2241.peg.2431	99.17	Spermidine export protein MdtJ
[truncated: 3,961 more rows]
